# Supplementary material for: Copper/silver co-mediated three-component bicyclization for accessing indeno[1,2-c]azepine-3,6-diones
Source: Royal Society of Chemistry journal article supplement (doi:10.1039/d1cc02973h), 2021-01-01
Supplement: d1cc02973h1.pdf [file d1cc02973h1.pdf]

# Supporting Information

## Copper/silver co-mediated three-component bicyclization for accessing indeno[1,2-*c*]azepine-3,6-diones

Shi-Chao Wang, Peng-Yu Liu, Yi-Xin Chen, Zheng-Jia Shen, Wen-Juan Hao,\* Shu-Jiang Tu,\* and Bo Jiang\*

<sup>a</sup>School of Chemistry & Materials Science, Jiangsu Key Laboratory of Green Synthetic Chemistry for Functional Materials, Jiangsu Normal University, Xuzhou 221116, P. R. China; email jiangchem@jsnu.edu.cn (B.J.); wjhao@jsnu.edu.cn (W.J.H.), laotu@jsnu.edu.cn (S.J.T.)

### Context

|                                                                                                                           |          |
|---------------------------------------------------------------------------------------------------------------------------|----------|
| General Information.....                                                                                                  | S2       |
| X-Ray Structures of Products <b>3f</b> .....                                                                              | S2       |
| Control Experiments .....                                                                                                 | S2       |
| Radical-Trapping Experiment.....                                                                                          | S3       |
| Intermediate Detection.....                                                                                               | S4       |
| General Procedure for the Synthesis of Products <b>3a</b> .....                                                           | S5       |
| Scale-up transformation of <b>3a</b> .....                                                                                | S5       |
| Lithium Aluminum Hydride Reduction of Compound <b>3a</b> .....                                                            | S5       |
| Characterization Data of Compounds <b>3a-3aa</b> and <b>5a</b> .....                                                      | S6-S16   |
| Copies of <sup>1</sup> H, <sup>13</sup> C and <sup>19</sup> F NMR Spectra for Compounds <b>3a-3aa</b> and <b>5a</b> ..... | S16-S100 |

## General Information

$^1\text{H}$  NMR ( $^{13}\text{C}$  NMR) spectra were measured on a Bruker DPX 400 MHz spectrometer in  $\text{CDCl}_3$  ( $\text{DMSO}-d_6$ ) with chemical shift ( $\delta$ ) given in ppm relative to TMS as internal standard [(s = singlet, d = doublet, t = triplet, brs = broad singlet, m = multiplet), coupling constant (Hz)]. HRMS (APCI and ESI) was determined by using microTOF-QII HRMS/MS instrument (BRUKER). X-Ray crystallographic analysis was performed with a Siemens SMART CCD and a Siemens P4 diffractometer. The melting points were measured with digital melting point detector.

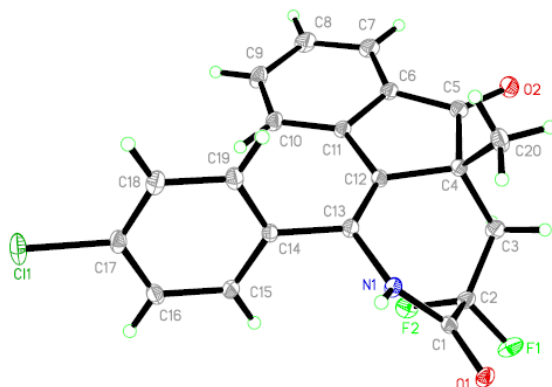

Figure S1. X-Ray Structure of **3f** (CCDC 2088124)

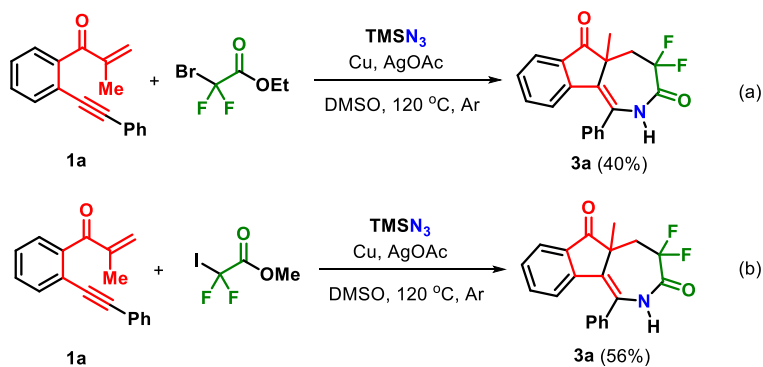

Scheme S1. Control experiments

To gain the influence of halogenated esters into this reaction, two controlled experiments were conducted. When  $\text{BrCF}_2\text{CO}_2\text{Et}$  as the halogenation reagent was added into the reaction system under the standard conditions, the reaction can proceed normally, and product **3a** is obtained with a yield of 40%. Meantime, when  $\text{ICF}_2\text{CO}_2\text{Me}$  was used in the reaction, product **3a** is obtained with a yield of 56%.

## Radical-Trapping Experiment:

TEMPO as the radical trapping reagent — General procedure

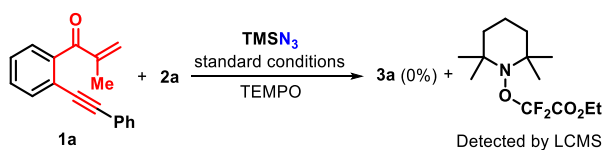

To a 25-mL Schlenk tube under Ar conditions, 1,6-enyne **1a** (0.2 mmol, 49 mg), Cu powder (0.5 mmol, 33mg), AgOAc (0.4 mmol, 67 mg), TMSN<sub>3</sub> (0.4 mmol, 46 mg), ethyl difluoroiodoacetate **2** (0.3 mmol, 75 mg) and TEMPO (0.6 mmol, 94 mg) in DMSO (2.0 mL) was stirred at 120 °C for 12 hours. After completion of the reaction, the solution was detected by LC-MS analysis (Figure S2).

Operator:MSQ Timebase:LCMS Sequence:SJ201606132

Page 1-1  
1/12/2021 11:16 AM

## Overlay of Samples and Spectra from Integration View

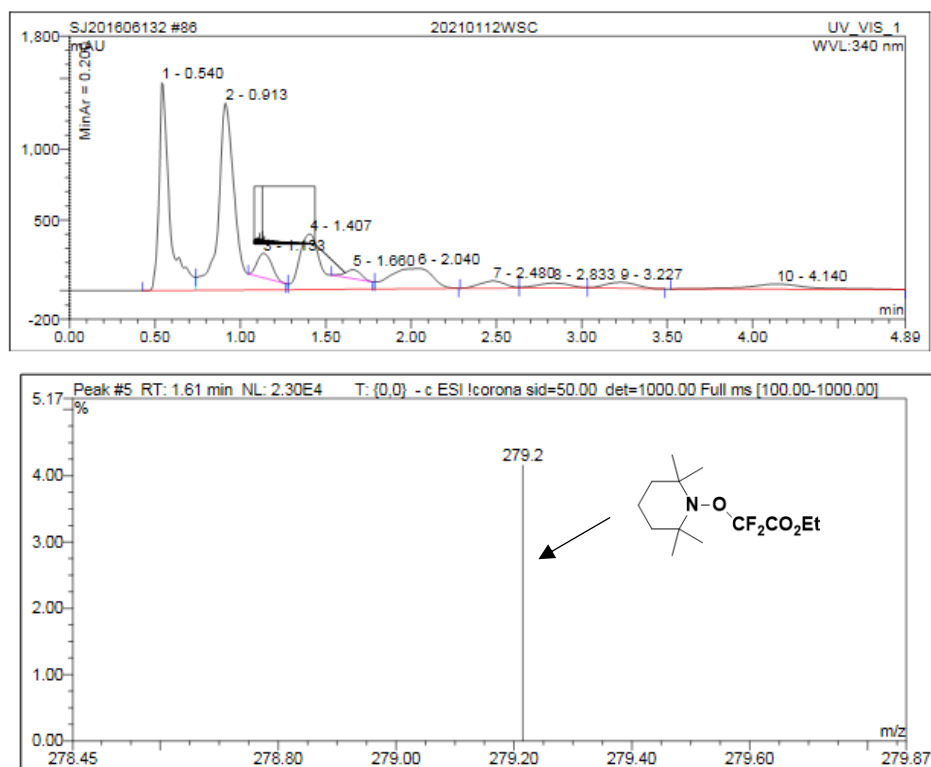

Figure S2. Copy of LC-MS Spectrum of TEMPO-S adduct

## Intermediate Detection

To a 25-mL Schlenk tube under Ar conditions, 1,6-enyne **1a** (0.2 mmol, 49 mg), Cu powder (0.5 mmol, 33mg), AgOAc (0.4 mmol, 67 mg), TMSN<sub>3</sub> (0.4 mmol, 46 mg) and ethyl difluoroiodoacetate **2** (0.3 mmol, 75 mg) in DMSO (2.0 mL) was stirred at 120 °C for 2 hours until complete consumption of **1a** as monitored by TLC analysis. Then the reaction system was directly measured by HR-MS analysis. The key intermediates **E**, **F** (or **H**) and **I** (or **J**) were detected by HR-MS (Figures S3-S5).

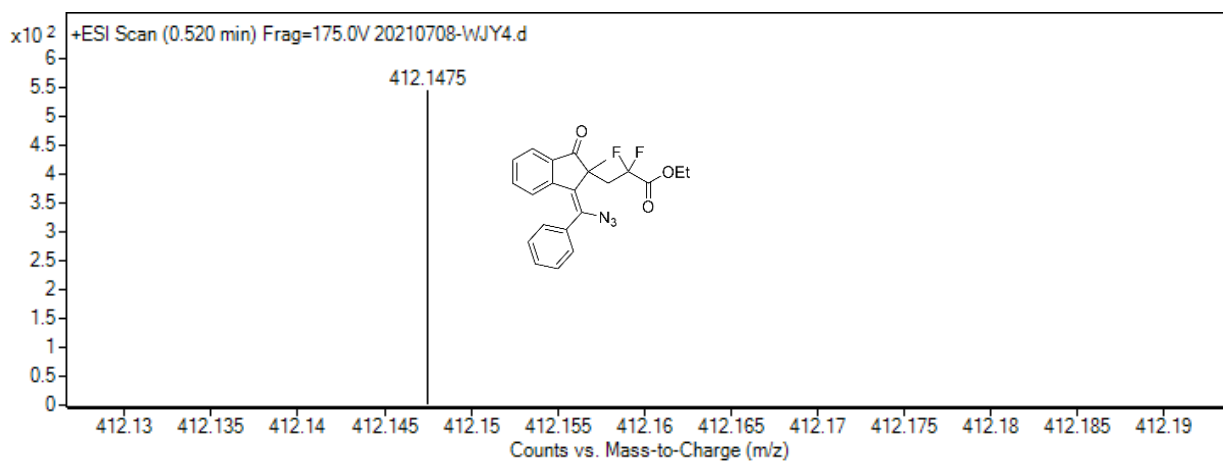

Figure S3. Copy of HR-MS Spectrum of Intermediate E

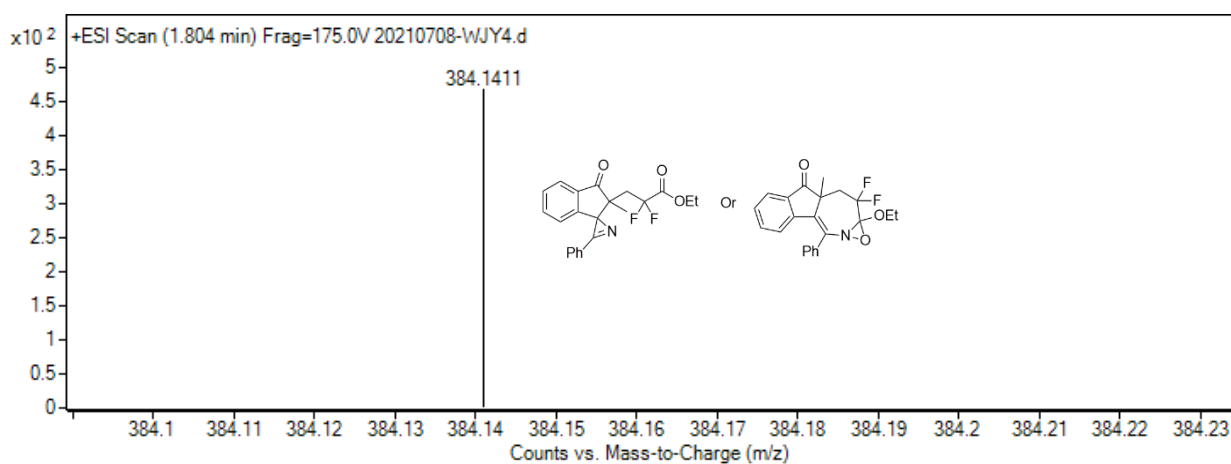

Figure S4. Copy of HR-MS Spectrum of Intermediate F or H

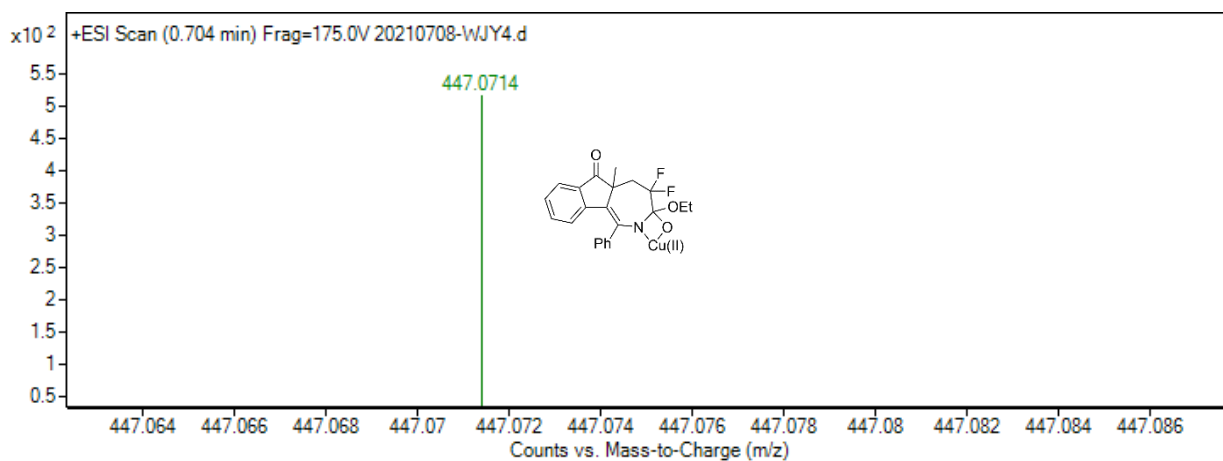

Figure S5. Copy of HR-MS Spectrum of Intermediate I or J



### General Procedure for the Synthesis of Products 3a

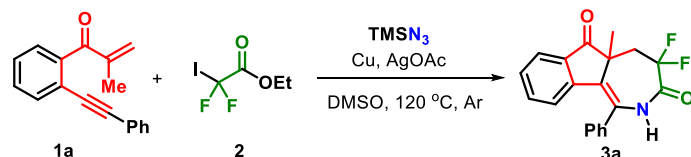

To a 10 mL-Schlenk tube, 1,6-enyne **1a** (0.2 mmol, 49 mg), Cu powder (0.5 mmol, 33 mg), AgOAc (0.4 mmol, 67 mg), TMSN<sub>3</sub> (0.4 mmol, 46 mg), ethyl difluoroiodoacetate **2** (0.3 mmol, 75 mg) and DMSO (2.0 mL) were sequentially added under the protection with argon. The resulting mixture was stirring at 120 °C in metal bath for 12 h. After the reaction was complete (by TLC), the reaction mixture was cooled to room temperature and washed with H<sub>2</sub>O (20 ml) and extracted with ethyl acetate (3 ×15 mL). The combined organic layer was dried over Na<sub>2</sub>SO<sub>4</sub>, filtered, and concentrated under reduced pressure. The resulting residue was purified by column chromatography on silica gel (eluent, petroleum ether/ethyl acetate = 10:1 v/v) to afford the desired product **3a** as white solid in 71% yield.

### Scale-up transformation of 3a

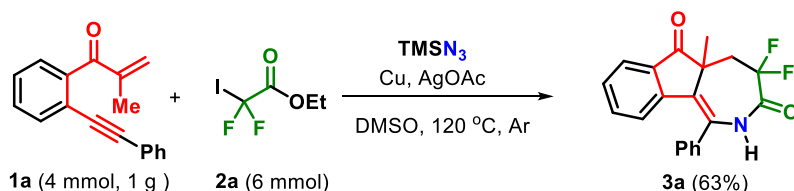

To a 50 mL-Schlenk flask, 1,6-enyne **1a** (4 mmol, 1.00 g), Cu powder (10 mmol, 0.66 g), AgOAc (8 mmol, 1.34 g), TMSN<sub>3</sub> (8 mmol, 0.92 g), ethyl difluoroiodoacetate **2** (6 mmol, 1.5 g) and DMSO (20 mL) were sequentially added under the protection with argon. The resulting mixture was stirring at 120 °C in metal bath for 12h. After the reaction was complete (by TLC), the reaction mixture was cooled to room temperature and washed with H<sub>2</sub>O (50 ml) and extracted with ethyl acetate (3 ×45 mL). The combined organic layer was dried over Na<sub>2</sub>SO<sub>4</sub>, filtered, and concentrated under reduced pressure. The resulting residue was purified by column chromatography on silica gel (eluent, petroleum ether/ethyl acetate = 10:1 v/v) to afford the desired product **3a** as white solid in 63% yield.

### Lithium aluminum hydride reduction of compound 3a

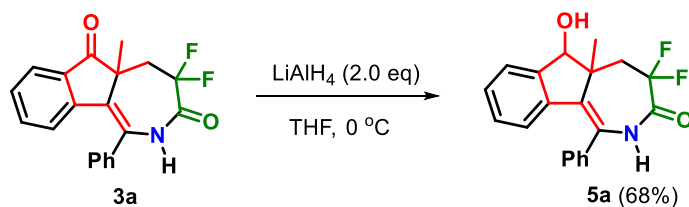

To a solution of **3a** (0.2 mmol, 0.0678g) in THF (2.0 mL) was added LiAlH<sub>4</sub> (1.0 M in THF, 2.5 equiv.) at 0 °C. The reaction mixture stirred for 30 minutes. After completion of the reaction, the residue was quenched with saturated NH<sub>4</sub>Cl solution, extracted with ethyl acetate and dried on MgSO<sub>4</sub>. The solvent was evaporated under reduced pressure and the products were purified through preparative thin layer chromatography to get desired products **5a**.

**4,4-difluoro-5a-methyl-1-phenyl-2,4,5,5a-tetrahydroindeno[1,2-c]azepine-3,6-dione (3a)**

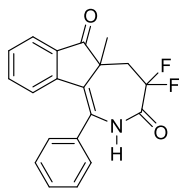

Isolation by column chromatography (petroleum ether/ ethyl acetate = 10/1 v/v) White solid, 48 mg, 71%; mp 215-217 °C  
<sup>1</sup>H NMR (400 MHz, CDCl<sub>3</sub>) (δ, ppm) 7.81 - 7.79 (m, 1H), 7.66 - 7.54 (m, 3H), 7.44 (d, *J* = 6.8 Hz, 2H), 7.36 - 7.29 (m, 2H), 6.86 (s, 1H), 6.65 (d, *J* = 7.2 Hz, 1H), 2.85 - 2.67 (m, 2H), 1.66 (s, 3H). <sup>13</sup>C NMR (100 MHz, CDCl<sub>3</sub>) (δ, ppm) 204.6, 164.4 (t, <sup>2</sup>*J*<sub>CF</sub> = 30.0 Hz), 146.5, 135.4, 135.0, 133.9, 132.1, 130.6, 130.3, 129.4, 129.2, 129.0, 128.8, 124.9, 124.3, 114.9, (t, <sup>1</sup>*J*<sub>CF</sub> = 248.0 Hz), 46.8, 46.7, (t, <sup>3</sup>*J*<sub>CF</sub> = 25.0 Hz), 46.6, 21.8. <sup>19</sup>F NMR (376 MHz, CDCl<sub>3</sub>) (δ, ppm) -97.0 (d, *J* = 251.9 Hz, 1F), -98.9 (d, *J* = 251.9 Hz, 1F). IR (KBr, ν, cm<sup>-1</sup>) 3244, 1715, 1694, 1473, 1336, 1249, 1172, 1022, 860, 768. HR-MS (ESI) *m/z* calcd for C<sub>20</sub>H<sub>14</sub>F<sub>2</sub>NO<sub>2</sub> [M-H]<sup>-</sup> 338.0993, found 338.0985.

**4,4-difluoro-5a-methyl-1-(*p*-tolyl)-2,4,5,5a-tetrahydroindeno[1,2-c]azepine-3,6-dione (3b)**

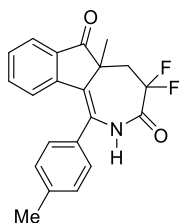

Isolation by column chromatography (petroleum ether/ ethyl acetate = 10/1 v/v) White solid, 25 mg, 35%; mp 230-231 °C  
<sup>1</sup>H NMR (400 MHz, CDCl<sub>3</sub>) (δ, ppm) 7.79 - 7.77 (m, 1H), 7.41 (s, 2H), 7.34 - 7.30 (m, 3H), 7.23 (d, *J* = 7.2 Hz, 1H), 7.09 - 6.98 (m, 1H), 6.73 - 6.71 (m, 1H), 2.78 - 2.60 (m, 2H), 2.47 (s, 3H), 1.63 (s, 3H). <sup>13</sup>C NMR (100 MHz, CDCl<sub>3</sub>) (δ, ppm) 204.8, 164.7 (t, <sup>2</sup>*J*<sub>CF</sub> = 30.0 Hz), 146.8, 141.0, 135.4, 133.9, 132.4 (t, <sup>4</sup>*J*<sub>CF</sub> = 3.0 Hz), 132.1, 131.0, 129.9, 129.4, 128.9, 128.5, 124.9, 124.5, 115.0 (t, <sup>1</sup>*J*<sub>CF</sub> = 248.0 Hz), 46.8 (t, <sup>3</sup>*J*<sub>CF</sub> = 23.0 Hz), 46.8, 46.5, 21.8, 21.7. <sup>19</sup>F NMR (376 MHz, CDCl<sub>3</sub>) (δ, ppm) -97.0 (d, *J* = 251.9 Hz, 1F), -99.0 (d, *J* = 251.9 Hz, 1F). IR (KBr, ν, cm<sup>-1</sup>) 3217, 3121, 1714, 1702, 1467, 1326, 1244, 1164, 1023, 826, 773. HR-MS (ESI) *m/z* calcd for C<sub>21</sub>H<sub>16</sub>F<sub>2</sub>NO<sub>2</sub> [M-H]<sup>-</sup> 352.1149, found 352.1139.

**4,4-difluoro-5a-methyl-1-(*m*-tolyl)-2,4,5,5a-tetrahydroindeno[1,2-c]azepine-3,6-dione (3c)**

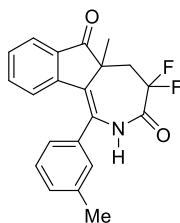

Isolation by column chromatography (petroleum ether/ ethyl acetate = 10/1 v/v) White solid, 30 mg, 42%; mp 168-169 °C  
<sup>1</sup>H NMR (400 MHz, DMSO-*d*<sub>6</sub>) (δ, ppm) 10.33 (s, 1H), 7.73 (d, *J* = 7.2 Hz, 1H), 7.60 - 7.37 (m, 4H), 7.27 - 7.23 (m, 2H), 6.53 - 6.47 (m, 1H), 2.75 - 2.66 (m, 2H), 2.38 (d, *J* = 43.2 Hz, 3H), 1.54 (s, 3H). <sup>13</sup>C NMR (100 MHz, DMSO-*d*<sub>6</sub>) (δ, ppm) 203.6, 164.8 (t, <sup>2</sup>*J*<sub>CF</sub> = 30.0 Hz), 145.8, 135.8, 135.6, 135.4, 133.9, 130.8, 130.5 (t, <sup>5</sup>*J*<sub>CF</sub> = 3.0 Hz), 130.2, 129.5, 129.0, 127.0, 125.6, 124.3, 115.8 (t, <sup>1</sup>*J*<sub>CF</sub> = 248.0 Hz), 100.0, 46.9 (d, <sup>4</sup>*J*<sub>CF</sub> = 10.0 Hz), 46.5 (t, <sup>3</sup>*J*<sub>CF</sub> = 24.0 Hz), 21.5, 21.5. <sup>19</sup>F NMR (376 MHz, DMSO-*d*<sub>6</sub>) (δ, ppm) -95.4 (d, *J* = 251.9 Hz, 1F), -98.1 (d, *J* = 251.9 Hz, 1F). IR (KBr, ν, cm<sup>-1</sup>) 3247,

3136, 1713, 1697, 1473, 1334, 1255, 1170, 1034, 963, 797. HR-MS (ESI)  $m/z$  calcd for  $C_{21}H_{16}F_2NO_2$   $[M-H]^-$  352.1149, found 352.1149.

**4,4-difluoro-1-(4-methoxyphenyl)-5a-methyl-2,4,5,5a-tetrahydroindeno[1,2-c]azepine-3,6-dione (3d)**

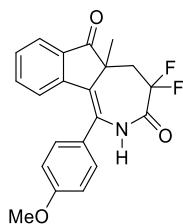

Isolation by column chromatography (petroleum ether/ ethyl acetate = 10/1 v/v) Yellow solid, 25 mg, 34%; mp 211-212 °C  $^1H$  NMR (400 MHz,  $CDCl_3$ ) ( $\delta$ , ppm) 7.80 - 7.76 (m, 1H), 7.41 (s, 2H), 7.34 - 7.30 (m, 3H), 7.23 (d,  $J = 6.4$  Hz, 1H), 7.04 (s, 1H), 6.74 - 6.71 (m, 1H), 2.79 - 2.63 (m, 2H), 2.47 (s, 3H), 1.64 (s, 3H).  $^{13}C$  NMR (100 MHz,  $CDCl_3$ ) ( $\delta$ , ppm) 204.82, 164.67 (t,  $^2J_{CF} = 30.0$  Hz), 161.43, 146.96, 135.42, 133.92, 132.14 (t,  $^5J_{CF} = 3.0$  Hz), 131.18, 130.45, 128.87, 128.26, 127.07, 124.95, 124.38, 115.05 (t,  $^1J_{CF} = 249.0$  Hz), 100.00, 55.61, 46.89 (t,  $^3J_{CF} = 23.0$  Hz), 46.65 (d,  $^4J_{CF} = 9.0$  Hz), 29.82, 21.80. -97.1 (d,  $J = 251.9$  Hz, 1F), -99.2 (d,  $J = 251.9$  Hz, 1F). HR-MS (ESI)  $m/z$  calcd for  $C_{21}H_{16}F_2NO_3$   $[M-H]^-$  368.1098, found 368.1098.

**4,4-difluoro-1-(4-fluorophenyl)-5a-methyl-2,4,5,5a-tetrahydroindeno[1,2-c]azepine-3,6-dione (3e)**

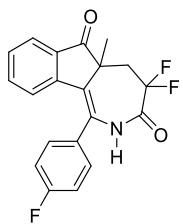

Isolation by column chromatography (petroleum ether/ ethyl acetate = 10/1 v/v) Yellow solid, 43 mg, 60%; mp 216-217 °C  $^1H$  NMR (400 MHz,  $CDCl_3$ ) ( $\delta$ , ppm) 7.82 - 7.80 (m, 1H), 7.55 (s, 1H), 7.42 (d,  $J = 5.6$  Hz, 1H), 7.38 - 7.34 (m, 2H), 7.33 - 7.30 (m, 1H), 7.17 - 7.13 (m, 1H), 7.04 (d,  $J = 3.2$  Hz, 1H), 6.68 - 6.65 (m, 1H), 2.80 - 2.62 (m, 2H), 1.65 (s, 3H).  $^{13}C$  NMR (100 MHz,  $CDCl_3$ ) ( $\delta$ , ppm) 204.4, 164.6 (t,  $^3J_{CF} = 30.0$  Hz), 164.0 (d,  $^1J_{CF} = 251.0$  Hz), 160.2, 146.3, 135.5, 134.0, 131.6 (t,  $^8J_{CF} = 8.0$  Hz), 131.3, 131.1 (t,  $^9J_{CF} = 3.0$  Hz), 129.2, 125.1, 124.2, 117.6 (d,  $^6J_{CF} = 22.0$  Hz), 116.5 (d,  $^5J_{CF} = 22.0$  Hz), 115.0 (t,  $^2J_{CF} = 248.0$  Hz), 100.0, 46.8 (t,  $^4J_{CF} = 24.0$  Hz), 46.6 (d,  $^7J_{CF} = 9.0$  Hz), 21.8.  $^{19}F$  NMR (376 MHz,  $CDCl_3$ ) ( $\delta$ , ppm) -97.1 (d,  $J = 251.9$  Hz, 1F), -99.1 (d,  $J = 251.9$  Hz, 1F), -108.8. IR (KBr,  $\nu$ ,  $cm^{-1}$ ) 3232, 3137, 1715, 1697, 1603, 1511, 1337, 1226, 1159, 1018, 845, 768 HR-MS (ESI)  $m/z$  calcd for  $C_{20}H_{13}F_3NO_2$   $[M-H]^-$  356.0898, found 356.0903.

**1-(4-chlorophenyl)-4,4-difluoro-5a-methyl-2,4,5,5a-tetrahydroindeno[1,2-c]azepine-3,6-dione (3f)**

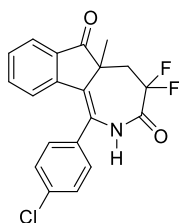

Isolation by column chromatography (petroleum ether/ ethyl acetate = 10/1 v/v) White solid, 52 mg, 70%; mp 231-233 °C  
<sup>1</sup>H NMR (400 MHz, CDCl<sub>3</sub>) (δ, ppm) 7.82 - 7.80 (m, 1H), 7.61 (d, *J* = 8.0 Hz, 1H), 7.50 (d, *J* = 8.0 Hz, 1H), 7.43 (d, *J* = 7.6 Hz, 1H), 7.40 - 7.36 (m, 3H), 6.94 (s, 1H), 6.72 - 6.70 (m, 1H), 2.80 - 2.62 (m, 2H), 1.65 (s, 3H). <sup>13</sup>C NMR (100 MHz, CDCl<sub>3</sub>) (δ, ppm) 204.3, 164.5 (t, <sup>2</sup>*J*<sub>CF</sub> = 30.0 Hz), 146.1, 136.8, 135.5, 134.1, 133.4, 130.9 (d, <sup>6</sup>*J*<sub>CF</sub> = 3.0 Hz), 130.8 (t, <sup>4</sup>*J*<sub>CF</sub> = 21.0 Hz), 129.6, 129.5, 129.3, 125.1, 124.2, 114.9 (t, <sup>1</sup>*J*<sub>CF</sub> = 248.0 Hz), 46.8 (t, <sup>3</sup>*J*<sub>CF</sub> = 24.0 Hz), 46.6 (d, <sup>5</sup>*J*<sub>CF</sub> = 9.0 Hz), 21.8. <sup>19</sup>F NMR (376 MHz, CDCl<sub>3</sub>) (δ, ppm) -97.1 (d, *J* = 251.9 Hz, 1F), -99.1 (d, *J* = 251.9 Hz, 1F). IR (KBr, ν, cm<sup>-1</sup>) 3235, 3137, 1716, 1692, 1597, 1473, 1340, 1299, 1172, 1019, 840, 768 HR-MS (ESI) m/z calcd for C<sub>20</sub>H<sub>13</sub>ClF<sub>2</sub>NO<sub>2</sub> [M-H]<sup>-</sup> 372.0603, found 372.0616.

**1-(4-bromophenyl)-4,4-difluoro-5a-methyl-2,4,5,5a-tetrahydroindeno[1,2-c]azepine-3,6-dione (3g)**

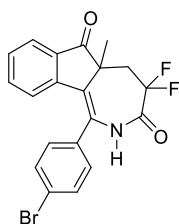

Isolation by column chromatography (petroleum ether/ ethyl acetate = 10/1 v/v) White solid, 53 mg, 64%; mp 208-209 °C  
<sup>1</sup>H NMR (400 MHz, CDCl<sub>3</sub>) (δ, ppm) 7.82 - 7.75 (m, 2H), 7.59 (d, *J* = 7.6 Hz, 1H), 7.43 (d, *J* = 7.6 Hz, 1H), 7.39 - 7.37 (m, 2H), 7.33 (d, *J* = 8.0 Hz, 1H), 6.97 (s, 1H), 6.73 - 6.71 (m, 1H), 2.80 - 2.62 (m, 2H), 1.64 (s, 3H). <sup>13</sup>C NMR (100 MHz, CDCl<sub>3</sub>) (δ, ppm) 204.2, 164.5 (t, <sup>2</sup>*J*<sub>CF</sub> = 30.0 Hz), 146.0, 135.5, 133.8 (t, <sup>4</sup>*J*<sub>CF</sub> = 18.0 Hz), 132.5, 131.1, 130.9 (d, <sup>6</sup>*J*<sub>CF</sub> = 3.0 Hz), 130.7, 129.5, 129.3, 125.1, 124.2, 114.9 (t, <sup>1</sup>*J*<sub>CF</sub> = 248.0 Hz), 46.8 (t, <sup>3</sup>*J*<sub>CF</sub> = 24.0 Hz), 46.6 (d, <sup>5</sup>*J*<sub>CF</sub> = 9.0 Hz), 21.7. <sup>19</sup>F NMR (376 MHz, CDCl<sub>3</sub>) (δ, ppm) -97.1 (d, *J* = 251.9 Hz, 1F), -99.1 (d, *J* = 251.9 Hz, 1F). IR (KBr, ν, cm<sup>-1</sup>) 3233, 3131, 1716, 1693, 1472, 1341, 1299, 1172, 1015, 840, 768 HR-MS (ESI) m/z calcd for C<sub>20</sub>H<sub>13</sub>BrF<sub>2</sub>NO<sub>2</sub> [M-H]<sup>-</sup> 416.0098, found 416.0100.

**4,4-difluoro-5a-methyl-1-(thiophen-2-yl)-2,4,5,5a-tetrahydroindeno[1,2-c]azepine-3,6-dione (3h)**

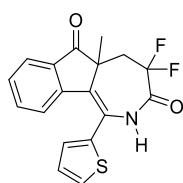

Isolation by column chromatography (petroleum ether/ ethyl acetate = 10/1 v/v) White solid, 56 mg, 65%; mp 219-220 °C  
<sup>1</sup>H NMR (400 MHz, DMSO-*d*<sub>6</sub>) (δ, ppm) 10.51 (s, 1H), 7.90 - 7.88 (m, 1H), 7.75 (d, *J* = 7.6 Hz, 1H), 7.55 - 7.50 (m, 1H), 7.46 - 7.43 (m, 1H), 7.33 - 7.32 (m, 1H), 7.25 - 7.23 (m, 1H), 6.75 (d, *J* = 8.0 Hz, 1H), 2.76 - 2.66 (m, 2H), 1.53 (s, 3H). <sup>13</sup>C NMR (100 MHz, DMSO-*d*<sub>6</sub>) (δ, ppm) 204.2, 164.1 (t, <sup>2</sup>*J*<sub>CF</sub> = 30.0 Hz), 146.6, 136.6, 136.1, 133.8, 130.1 (t, <sup>4</sup>*J*<sub>CF</sub> = 21.0 Hz), 129.7, 128.5, 126.9 (d, <sup>6</sup>*J*<sub>CF</sub> = 3.0 Hz), 124.9, 124.1, 115.7 (t, <sup>1</sup>*J*<sub>CF</sub> = 248.0 Hz), 60.2, 46.6 (d, <sup>5</sup>*J*<sub>CF</sub> = 9.0 Hz), 46.5 (t, <sup>3</sup>*J*<sub>CF</sub> = 24.0 Hz), 45.4, 21.3. <sup>19</sup>F NMR (376 MHz, DMSO-*d*<sub>6</sub>) (δ, ppm) -95.7 (d, *J* = 251.9 Hz, 1F), -98.8 (d, *J* = 251.9 Hz, 1F). IR (KBr, ν, cm<sup>-1</sup>) 3213, 3113, 1717, 1640, 1468, 1328, 1296, 1241, 1164, 1112, 965, 773 HR-MS (ESI) m/z calcd for C<sub>18</sub>H<sub>12</sub>F<sub>2</sub>NO<sub>2</sub>S [M-H]<sup>-</sup> 344.0557, found 344.0552.

**4,4,8-trifluoro-5a-methyl-1-phenyl-2,4,5,5a-tetrahydroindeno[1,2-c]azepine-3,6-dione (3i)**

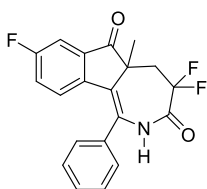

Isolation by column chromatography (petroleum ether/ ethyl acetate = 10/1 v/v) White solid, 40 mg, 56%; mp 235-236 °C <sup>1</sup>H NMR (400 MHz, CDCl<sub>3</sub>) (δ, ppm) 7.63 - 7.53 (m, 3H), 7.46 - 7.39 (m, 3H), 7.06 - 7.01 (m, 1H), 6.86 (s, 1H), 6.63 - 6.58 (m, 1H), 2.81 - 2.67 (m, 2H), 1.66 (s, 3H). <sup>13</sup>C NMR (100 MHz, DMSO-*d*<sub>6</sub>) (δ, ppm) 203.8, 164.4 (t, <sup>3</sup>J<sub>CF</sub> = 28.0 Hz), 162.4 (d, <sup>1</sup>J<sub>CF</sub> = 248.0 Hz), 143.6, 135.7, 133.9 (t, <sup>8</sup>J<sub>CF</sub> = 3.0 Hz), 130.6, 130.4, 130.1, 129.6, 129.0, 127.1, 126.0 (d, <sup>7</sup>J<sub>CF</sub> = 8.0 Hz), 124.0, 123.8, 115.8 (t, <sup>1</sup>J<sub>CF</sub> = 248.0 Hz), 110.4 (d, <sup>5</sup>J<sub>CF</sub> = 22.0 Hz), 47.0 (d, <sup>6</sup>J<sub>CF</sub> = 9.0 Hz), 46.4 (t, <sup>4</sup>J<sub>CF</sub> = 25.0 Hz), 21.6. <sup>19</sup>F NMR (376 MHz, DMSO-*d*<sub>6</sub>) (δ, ppm) -97.1 (d, *J* = 251.9 Hz, 1F), -99.1 (d, *J* = 251.9 Hz, 1F), -110.4. IR (KBr, ν, cm<sup>-1</sup>) 3240, 3131, 1716, 1697, 1486, 1341, 1272, 1148, 1029, 882, 721 HR-MS (ESI) *m/z* calcd for C<sub>20</sub>H<sub>13</sub>F<sub>3</sub>NO<sub>2</sub> [M-H]<sup>-</sup> 356.0898, found 356.0887.

**4,4,8-trifluoro-5a-methyl-1-(p-tolyl)-2,4,5,5a-tetrahydroindeno[1,2-c]azepine-3,6-dione (3j)**

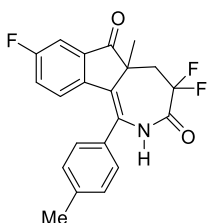

Isolation by column chromatography (petroleum ether/ ethyl acetate = 10/1 v/v) White solid, 46 mg, 62%; mp 249-250 °C <sup>1</sup>H NMR (400 MHz, CDCl<sub>3</sub>) (δ, ppm) 7.41 - 7.39 (m, 3H), 7.29 (s, 1H), 7.24 (d, *J* = 7.6 Hz, 1H), 7.07 - 7.01 (m, 1H), 6.89 (s, 1H), 6.70 - 6.67 (m, 1H), 2.78 - 2.65 (m, 2H), 2.47 (s, 3H), 1.64 (s, 3H). <sup>13</sup>C NMR (100 MHz, DMSO-*d*<sub>6</sub>) (δ, ppm) 204.0, 164.5 (t, <sup>3</sup>J<sub>CF</sub> = 28.0 Hz), 162.5 (d, <sup>1</sup>J<sub>CF</sub> = 248.0 Hz), 143.8, 143.8, 140.3, 135.7, 134.0 (t, <sup>8</sup>J<sub>CF</sub> = 3.0 Hz), 132.8, 131.0, 130.0, 129.0, 126.8, 126.1 (d, <sup>7</sup>J<sub>CF</sub> = 8.0 Hz), 124.1, 123.9, 115.8 (t, <sup>1</sup>J<sub>CF</sub> = 248.0 Hz), 110.4 (d, <sup>5</sup>J<sub>CF</sub> = 22.0 Hz), 47.1 (d, <sup>6</sup>J<sub>CF</sub> = 9.0 Hz), 46.5 (t, <sup>4</sup>J<sub>CF</sub> = 24.0 Hz), 21.6. <sup>19</sup>F NMR (376 MHz, CDCl<sub>3</sub>) (δ, ppm) -97.2 (d, *J* = 251.9 Hz, 1F), -99.2 (d, *J* = 251.9 Hz, 1F), -110.7. IR (KBr, ν, cm<sup>-1</sup>) 3248, 3135, 1716, 1698, 1482, 1343, 1271, 1148, 1027, 885, 758 HR-MS (ESI) *m/z* calcd for C<sub>21</sub>H<sub>15</sub>F<sub>3</sub>NO<sub>2</sub> [M-H]<sup>-</sup> 370.1055, found 370.1055.

**1-(4-ethylphenyl)-4,4,8-trifluoro-5a-methyl-2,4,5,5a-tetrahydroindeno[1,2-c]azepine-3,6-dione (3k)**

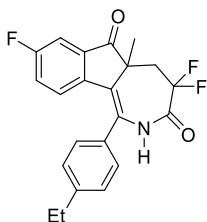

Isolation by column chromatography (petroleum ether/ ethyl acetate = 10/1 v/v) Yellow solid, 39 mg, 51%; mp 215-216 °C <sup>1</sup>H NMR (400 MHz, CDCl<sub>3</sub>) (δ, ppm) 7.44 - 7.40 (m, 3H), 7.31 (d, *J* = 7.2 Hz, 1H), 7.25 (s, 1H), 7.07 - 7.02 (m, 1H), 6.85 (s, 1H), 6.70 - 6.67 (m, 1H), 2.80 - 2.76 (m, 2H), 2.74 - 2.65 (m, 2H), 1.64 (s, 3H), 1.32 (t, *J* = 7.6 Hz, 3H). <sup>13</sup>C NMR (100 MHz, DMSO-*d*<sub>6</sub>) (δ, ppm) 203.9, 164.4 (t, <sup>3</sup>J<sub>CF</sub> = 28.0 Hz), 161.4 (d, <sup>1</sup>J<sub>CF</sub> = 248.0 Hz), 146.5, 143.7, 135.6 (d, <sup>8</sup>J<sub>CF</sub> = 8.0 Hz), 134.0 (t, <sup>9</sup>J<sub>CF</sub> = 3.0 Hz), 133.0, 130.1, 129.8, 128.8, 126.8, 126.0 (d, <sup>6</sup>J<sub>CF</sub> = 9.0 Hz), 124.0, 123.8, 115.8 (t, <sup>1</sup>J<sub>CF</sub> = 248.0 Hz), 110.3 (d, <sup>5</sup>J<sub>CF</sub> = 22.0 Hz), 47.0 (d, <sup>6</sup>J<sub>CF</sub> = 9.0 Hz), 46.4 (t, <sup>4</sup>J<sub>CF</sub> = 24.0 Hz), 28.6, 21.5, 15.9. <sup>19</sup>F NMR (376 MHz,

DMSO-*d*<sub>6</sub>) ( $\delta$ , ppm) -95.5 (d,  $J$  = 251.9 Hz, 1F), -98.4 (d,  $J$  = 251.9 Hz, 1F), -111.9. IR (KBr,  $\nu$ , cm<sup>-1</sup>) 3256, 3136, 1717, 1694, 1483, 1341, 1270, 1147, 1026, 838, 748 HR-MS (ESI)  $m/z$  calcd for C<sub>22</sub>H<sub>17</sub>F<sub>3</sub>NO<sub>2</sub> [M-H]<sup>-</sup> 384.1211, found 384.1208.

**1-(4-(*tert*-butyl)phenyl)-4,4,8-trifluoro-5a-methyl-2,4,5,5a-tetrahydroindeno[1,2-*c*]azepine-3,6-dione (3l)**

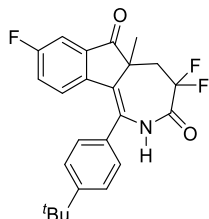

Isolation by column chromatography (petroleum ether/ ethyl acetate = 10/1 v/v) Yellow solid, 43 mg, 52%; mp 180-181 °C <sup>1</sup>H NMR (400 MHz, DMSO-*d*<sub>6</sub>) ( $\delta$ , ppm) 10.29 (d,  $J$  = 3.6 Hz, 1H), 7.67 (s, 1H), 7.51 - 7.48 (m, 2H), 7.39 - 7.32 (m, 3H), 6.54 - 6.51 (m, 1H), 2.76 - 2.66 (m, 2H), 1.54 (s, 3H), 1.36 (s, 9H). <sup>13</sup>C NMR (100 MHz, DMSO-*d*<sub>6</sub>) ( $\delta$ , ppm) 203.9, 164.4 (t, <sup>3</sup> $J_{CF}$  = 28.0 Hz), 162.5 (d, <sup>1</sup> $J_{CF}$  = 248.0 Hz), 153.4, 143.8, 135.7 (d, <sup>7</sup> $J_{CF}$  = 8.0 Hz), 134.0 (t, <sup>9</sup> $J_{CF}$  = 3.0 Hz), 132.9, 129.9, 128.8, 127.3, 126.9, 126.0 (d, <sup>7</sup> $J_{CF}$  = 8.0 Hz), 123.9, 115.8 (t, <sup>1</sup> $J_{CF}$  = 248.0 Hz), 110.5 (d, <sup>5</sup> $J_{CF}$  = 22.0 Hz), 65.5, 47.1 (d, <sup>6</sup> $J_{CF}$  = 9.0 Hz), 46.5 (t, <sup>4</sup> $J_{CF}$  = 24.0 Hz), 35.2, 31.6, 21.5, 15.7. <sup>19</sup>F NMR (376 MHz, DMSO-*d*<sub>6</sub>) ( $\delta$ , ppm) -97.2 (d,  $J$  = 251.9 Hz, 1F), -99.2 (d,  $J$  = 251.9 Hz, 1F), -110.7. IR (KBr,  $\nu$ , cm<sup>-1</sup>) 3252, 3072, 1717, 1608, 1584, 1380, 1270, 1148, 1104, 1027, 852, 785 HR-MS (ESI)  $m/z$  calcd for C<sub>24</sub>H<sub>21</sub>F<sub>3</sub>NO<sub>2</sub> [M-H]<sup>-</sup> 412.1524, found 412.1526.

**8-chloro-4,4-difluoro-5a-methyl-1-phenyl-2,4,5,5a-tetrahydroindeno[1,2-*c*]azepine-3,6-dione (3m)**

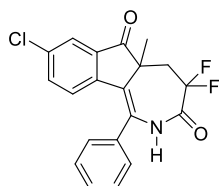

Isolation by column chromatography (petroleum ether/ ethyl acetate = 10/1 v/v) White solid, 45 mg, 60%; mp 232-234 °C <sup>1</sup>H NMR (400 MHz, DMSO-*d*<sub>6</sub>) ( $\delta$ , ppm) 10.42 (s, 1H), 7.73 - 7.72 (m, 1H), 7.64 - 7.58 (m, 1H), 7.55 - 7.45 (m, 4H), 6.52 - 6.42 (m, 1H), 2.82 - 2.67 (m, 2H), 1.55 (s, 3H). <sup>13</sup>C NMR (100 MHz, DMSO-*d*<sub>6</sub>) ( $\delta$ , ppm) 203.9, 164.4 (t, <sup>4</sup> $J_{CF}$  = 28.0 Hz), 161.4 (d, <sup>1</sup> $J_{CF}$  = 248.0 Hz), 146.4, 143.7, 135.6 (d, <sup>7</sup> $J_{CF}$  = 8.0 Hz), 134.0, 133.0, 129.9 (d, <sup>3</sup> $J_{CF}$  = 30.0 Hz), 129.0, 126.8, 126.0, 124.0, 115.8 (t, <sup>1</sup> $J_{CF}$  = 248.0 Hz), 110.5, 47.0 (d, <sup>6</sup> $J_{CF}$  = 10.0 Hz), 46.4 (t, <sup>5</sup> $J_{CF}$  = 24.0 Hz), 28.6, 21.5, 15.9. <sup>19</sup>F NMR (376 MHz, DMSO-*d*<sub>6</sub>) ( $\delta$ , ppm) -95.4 (d,  $J$  = 251.9 Hz, 1F), -98.2 (d,  $J$  = 251.9 Hz, 1F), -110.4. IR (KBr,  $\nu$ , cm<sup>-1</sup>) 3222, 3125, 1719, 1698, 1468, 1340, 1246, 1171, 1030, 847, 787 HR-MS (ESI)  $m/z$  calcd for C<sub>20</sub>H<sub>13</sub>ClF<sub>2</sub>NO<sub>2</sub> [M-H]<sup>-</sup> 372.0603, found 372.0613.

**8-chloro-4,4-difluoro-5a-methyl-1-(*p*-tolyl)-2,4,5,5a-tetrahydroindeno[1,2-*c*]azepine-3,6-dione (3n)**

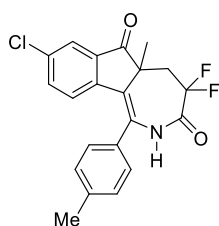

Isolation by column chromatography (petroleum ether/ ethyl acetate = 10/1 v/v) White solid, 42 mg, 54%; mp 221-222 °C

<sup>1</sup>H NMR (400 MHz, DMSO-*d*<sub>6</sub>) (δ, ppm) 10.36 (s, 1H), 7.72 (d, *J* = 2.0 Hz, 1H), 7.53 - 7.50 (m, 1H), 7.46 (d, *J* = 7.2 Hz, 1H), 7.34 (d, *J* = 8.0 Hz, 2H), 7.28 (d, *J* = 7.6 Hz, 1H), 6.55 (d, *J* = 8.8 Hz, 1H), 2.77 - 2.66 (m, 2H), 2.42 (s, 3H), 1.53 (s, 3H). <sup>13</sup>C NMR (100 MHz, DMSO-*d*<sub>6</sub>) (δ, ppm) 203.6, 164.5 (t, <sup>2</sup>*J*<sub>CF</sub> = 30.0 Hz), 146.0, 140.4, 135.8, 135.2, 135.0 (d, <sup>5</sup>*J*<sub>CF</sub> = 3.0 Hz), 133.7, 132.6, 131.0 (t, <sup>5</sup>*J*<sub>CF</sub> = 3.0 Hz), 130.1, 128.9, 126.5, 125.6, 124.2, 115.8 (t, <sup>1</sup>*J*<sub>CF</sub> = 247.0 Hz), 46.9 (d, <sup>4</sup>*J*<sub>CF</sub> = 10.0 Hz), 46.5 (t, <sup>3</sup>*J*<sub>CF</sub> = 24.0 Hz), 43.8, 21.6, 21.4. <sup>19</sup>F NMR (376 MHz, DMSO-*d*<sub>6</sub>) (δ, ppm) -95.5 (d, *J* = 251.9 Hz, 1F), -98.4 (d, *J* = 251.9 Hz, 1F). IR (KBr, ν, cm<sup>-1</sup>) 3239, 3131, 1719, 1692, 1469, 1377, 1245, 1168, 1028, 830, 780 HR-MS (ESI) *m/z* calcd for C<sub>21</sub>H<sub>15</sub>ClF<sub>2</sub>NO<sub>2</sub> [M-H]<sup>-</sup> 386.0759, found 386.0759.

**8-chloro-1-(4-ethylphenyl)-4,4-difluoro-5a-methyl-2,4,5,5a-tetrahydroindeno[1,2-*c*]azepine-3,6-dione (3o)**

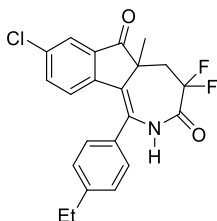

Isolation by column chromatography (petroleum ether/ ethyl acetate = 10/1 v/v) White solid, 47 mg, 59%; mp 177-178 °C <sup>1</sup>H NMR (400 MHz, CDCl<sub>3</sub>) (δ, ppm) 7.73 (d, *J* = 2.4 Hz, 1H), 7.44 (s, 2H), 7.31 - 7.27 (m, 2H), 7.25 (d, *J* = 2.4 Hz, 1H), 6.98 (d, *J* = 3.6 Hz, 1H), 6.63 (d, *J* = 8.8 Hz, 1H), 2.79 - 2.76 (m, 2H), 2.74 - 2.64 (m, 2H), 1.63 (s, 3H), 1.31 (t, *J* = 7.6 Hz, 3H). <sup>13</sup>C NMR (100 MHz, CDCl<sub>3</sub>) (δ, ppm) 203.6, 164.5 (t, <sup>2</sup>*J*<sub>CF</sub> = 30.0 Hz), 147.5, 145.1, 135.5, 135.1, 132.9 (d, <sup>5</sup>*J*<sub>CF</sub> = 3.0 Hz), 132.0, 129.9, 129.4, 128.9, 128.7, 127.5, 125.5, 124.4, 114.9 (t, <sup>1</sup>*J*<sub>CF</sub> = 248.0 Hz), 100.0, 46.0 (d, <sup>4</sup>*J*<sub>CF</sub> = 9.0 Hz), 46.7 (t, <sup>3</sup>*J*<sub>CF</sub> = 24.0 Hz), 28.9, 21.9, 15.4. <sup>19</sup>F NMR (376 MHz, CDCl<sub>3</sub>) (δ, ppm) -97.1 (d, *J* = 251.9 Hz, 1F), -99.2 (d, *J* = 251.9 Hz, 1F). IR (KBr, ν, cm<sup>-1</sup>) 3265, 3137, 1719, 1694, 1469, 1340, 1244, 1124, 1027, 839, 794 HR-MS (ESI) *m/z* calcd for C<sub>22</sub>H<sub>17</sub>ClF<sub>2</sub>NO<sub>2</sub> [M-H]<sup>-</sup> 400.0916, found 400.0930.

**8-chloro-4,4-difluoro-5a-methyl-1-(4-propylphenyl)-2,4,5,5a-tetrahydroindeno[1,2-*c*]azepine-3,6-dione (3p)**

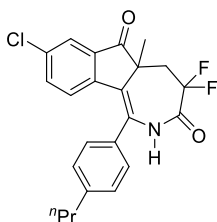

Isolation by column chromatography (petroleum ether/ ethyl acetate = 10/1 v/v) Yellow solid, 52 mg, 63%; mp 140-142 °C <sup>1</sup>H NMR (400 MHz, DMSO-*d*<sub>6</sub>) (δ, ppm) 10.37 (s, 1H), 7.71 (d, *J* = 2.0 Hz, 1H), 7.49 - 7.46 (m, 2H), 7.36 (d, *J* = 8.8 Hz, 2H), 7.29 (d, *J* = 7.6 Hz, 1H), 6.49 (d, *J* = 8.4 Hz, 1H), 2.77 - 2.65 (m, 4H), 1.68 - 1.63 (m, 2H), 1.53 (s, 3H), 0.95 (t, *J* = 7.2 Hz, 3H). <sup>13</sup>C NMR (100 MHz, DMSO-*d*<sub>6</sub>) (δ, ppm) 203.5, 164.5 (t, <sup>2</sup>*J*<sub>CF</sub> = 30.0 Hz), 146.0, 145.0, 135.7, 135.2, 135.1, 133.7, 132.9, 130.4, 129.9, 129.4, 128.9, 126.6, 125.5, 124.2, 115.8 (t, <sup>1</sup>*J*<sub>CF</sub> = 247.0 Hz), 46.9 (d, <sup>4</sup>*J*<sub>CF</sub> = 9.0 Hz), 46.5 (t, <sup>3</sup>*J*<sub>CF</sub> = 24.0 Hz), 37.6, 24.5, 21.4, 14.1. <sup>19</sup>F NMR (376 MHz, DMSO-*d*<sub>6</sub>) (δ, ppm) -95.4 (d, *J* = 251.9 Hz, 1F), -98.4 (d, *J* = 251.9 Hz, 1F). IR (KBr, ν, cm<sup>-1</sup>) 3244, 3157, 1718, 1699, 1466, 1325, 1250, 1166, 1032, 837, 728 HR-MS (ESI) *m/z* calcd for C<sub>23</sub>H<sub>19</sub>ClF<sub>2</sub>NO<sub>2</sub> [M-H]<sup>-</sup> 414.1072, found 414.1065.

**1-(4-*tert*-butylphenyl)-8-chloro-4,4-difluoro-5a-methyl-2,4,5,5a-tetrahydroindeno[1,2-*c*]azepine-3,6-dione (3q)**

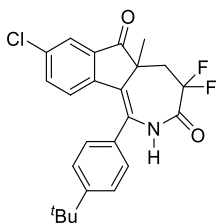

Isolation by column chromatography (petroleum ether/ ethyl acetate = 10/1 v/v) Yellow solid, 55 mg, 64%; mp 194-195 °C  $^1\text{H}$  NMR (400 MHz,  $\text{DMSO-}d_6$ ) ( $\delta$ , ppm) 10.34 (s, 1H), 7.72 - 7.67 (m, 2H), 7.51 - 7.48 (m, 2H), 7.38 (d,  $J = 8.8$  Hz, 2H), 6.49 (d,  $J = 8.8$  Hz, 1H), 2.76 - 2.66 (m, 2H), 1.53 (s, 3H), 1.36 (s, 9H).  $^{13}\text{C}$  NMR (100 MHz,  $\text{CDCl}_3$ ) ( $\delta$ , ppm) 203.5, 164.4 (t,  $^2J_{\text{CF}} = 30.0$  Hz), 154.5, 145.1, 135.5, 135.1 (d,  $^5J_{\text{CF}} = 3.0$  Hz), 132.7 (d,  $^5J_{\text{CF}} = 3.0$  Hz), 131.7, 129.1, 128.6, 127.4, 127.4, 126.1, 125.5, 124.4, 114.8 (t,  $^1J_{\text{CF}} = 248.0$  Hz), 47.0 (d,  $^4J_{\text{CF}} = 8.0$  Hz), 46.7 (t,  $^3J_{\text{CF}} = 24.0$  Hz), 35.1, 31.3, 21.8.  $^{19}\text{F}$  NMR (376 MHz,  $\text{DMSO-}d_6$ ) ( $\delta$ , ppm) -95.5 (d,  $J = 251.9$  Hz, 1F), -98.4 (d,  $J = 251.9$  Hz, 1F). IR (KBr,  $\nu$ ,  $\text{cm}^{-1}$ ) 3244, 3153, 1721, 1703, 1465, 1328, 1251, 1192, 1034, 828, 777 HR-MS (ESI)  $m/z$  calcd for  $\text{C}_{24}\text{H}_{21}\text{ClF}_2\text{NO}_2$  [ $\text{M-H}$ ] $^-$  428.1229, found 428.1229.

**8-chloro-4,4-difluoro-1-(4-methoxyphenyl)-5a-methyl-2,4,5,5a-tetrahydroindeno[1,2-c]azepine-3,6-dione (3r)**

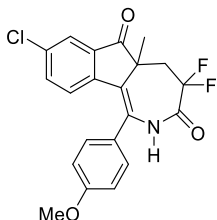

Isolation by column chromatography (petroleum ether/ ethyl acetate = 10/1 v/v) White solid, 56 mg, 65%; mp 216-218 °C  $^1\text{H}$  NMR (400 MHz,  $\text{DMSO-}d_6$ ) ( $\delta$ , ppm) 10.33 (d,  $J = 4.0$  Hz, 1H), 7.70 (d,  $J = 1.6$  Hz, 1H), 7.53 - 7.50 (m, 1H), 7.38 (d,  $J = 8.8$  Hz, 2H), 7.18 (d,  $J = 7.2$  Hz, 1H), 7.01 (d,  $J = 8.4$  Hz, 1H), 6.60 (d,  $J = 8.8$  Hz, 1H), 3.84 (s, 3H), 2.74 - 2.64 (m, 2H), 1.52 (s, 3H).  $^{13}\text{C}$  NMR (100 MHz,  $\text{DMSO-}d_6$ ) ( $\delta$ , ppm) 203.6, 164.6 (t,  $^2J_{\text{CF}} = 30.0$  Hz), 161.1, 146.2, 135.7, 135.2, 134.9 (d,  $^5J_{\text{CF}} = 3.0$  Hz), 133.5, 131.8, 130.5, 129.0, 127.4, 126.2, 125.6, 124.1, 115.8 (t,  $^1J_{\text{CF}} = 248.0$  Hz), 55.8, 46.9 (d,  $^4J_{\text{CF}} = 9.0$  Hz), 46.5 (t,  $^3J_{\text{CF}} = 24.0$  Hz), 21.4.  $^{19}\text{F}$  NMR (376 MHz,  $\text{DMSO-}d_6$ ) ( $\delta$ , ppm) -95.5 (d,  $J = 251.9$  Hz, 1F), -98.6 (d,  $J = 251.9$  Hz, 1F). IR (KBr,  $\nu$ ,  $\text{cm}^{-1}$ ) 3230, 3133, 1720, 1695, 1514, 1469, 1346, 1248, 1166, 1028, 843, 780 HR-MS (ESI)  $m/z$  calcd for  $\text{C}_{21}\text{H}_{15}\text{ClF}_2\text{NO}_3$  [ $\text{M-H}$ ] $^-$  402.0709, found 402.0709.

**8-chloro-4,4-difluoro-1-(4-fluorophenyl)-5a-methyl-2,4,5,5a-tetrahydroindeno[1,2-c]azepine-3,6-dione (3s)**

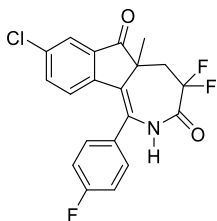

Isolation by column chromatography (petroleum ether/ ethyl acetate = 10/1 v/v) White solid, 51 mg, 65%; mp 227-229 °C  $^1\text{H}$  NMR (400 MHz,  $\text{DMSO-}d_6$ ) ( $\delta$ , ppm) 10.42 (d,  $J = 4.4$  Hz, 1H), 8.33 (s, 1H), 7.73 (d,  $J = 2.4$  Hz, 1H), 7.55 - 7.47 (m, 4H), 7.32 (t,  $J = 8.4$  Hz, 1H), 6.51 (d,  $J = 8.4$  Hz, 1H), 2.78 - 2.67 (m, 2H), 1.54 (s, 3H).  $^{13}\text{C}$  NMR (100 MHz,  $\text{DMSO-}d_6$ ) ( $\delta$ , ppm) 203.4, 164.5 (t,  $^2J_{\text{CF}} = 28.0$  Hz), 162.3, 145.7, 135.9, 135.4, 133.8 (d,  $^9J_{\text{CF}} = 3.0$  Hz), 132.6 (d,  $^6J_{\text{CF}} = 9.0$  Hz), 131.8 (d,  $^9J_{\text{CF}} = 3.0$  Hz), 131.5 (d,  $^6J_{\text{CF}} = 9.0$  Hz), 127.1, 125.6, 124.3, 117.5 (d,  $^4J_{\text{CF}} = 22.0$  Hz), 116.6 (d,  $^4J_{\text{CF}} = 22.0$  Hz),



115.8 (t,  $^1J_{CF} = 247.0$  Hz), 79.7, 46.9 (d,  $^6J_{CF} = 9.0$  Hz), 46.4 (t,  $^3J_{CF} = 24.0$  Hz), 21.4.  $^{19}\text{F}$  NMR (376 MHz, DMSO- $d_6$ ) ( $\delta$ , ppm) -95.5 (d,  $J = 251.9$  Hz, 1F), -98.4 (d,  $J = 251.9$  Hz, 1F), -110.4. IR (KBr,  $\nu$ ,  $\text{cm}^{-1}$ ) 3219, 3125, 1720, 1701, 1511, 1468, 1341, 1248, 1170, 1030, 849, 789 HR-MS (ESI)  $m/z$  calcd for  $\text{C}_{20}\text{H}_{12}\text{ClF}_3\text{NO}_2$   $[\text{M}-\text{H}]^-$  390.0509, found 390.0507.

**1-(4-chlorophenyl)-4,4-difluoro-5a,8-dimethyl-2,4,5,5a-tetrahydroindeno[1,2-c]azepine-3,6-dione (3t)**

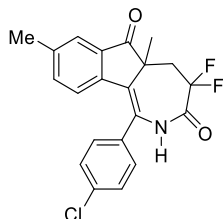

Isolation by column chromatography (petroleum ether/ ethyl acetate = 10/1 v/v) White solid, 45 mg, 43%; mp 227-229 °C  $^1\text{H}$  NMR (400 MHz,  $\text{CDCl}_3$ ) ( $\delta$ , ppm) 7.70 (d,  $J = 8.0$  Hz, 1H), 7.60 (s, 1H), 7.53 - 7.36 (m, 3H), 7.19 (d,  $J = 8.0$  Hz, 1H), 6.95 (d,  $J = 3.6$  Hz, 1H), 6.49 (s, 1H), 2.79 - 2.59 (m, 2H), 2.20 (s, 3H), 1.63 (s, 3H).  $^{13}\text{C}$  NMR (100 MHz,  $\text{CDCl}_3$ ) ( $\delta$ , ppm) 203.6, 164.5 (t,  $^2J_{CF} = 30.0$  Hz), 146.7, 146.4, 136.7, 133.5, 131.9, 131.0, 130.7, 130.6 (d,  $^5J_{CF} = 3.0$  Hz), 129.6, 129.3, 127.4, 124.9, 124.4, 114.9 (t,  $^1J_{CF} = 248.0$  Hz), 46.9 (t,  $^3J_{CF} = 24.0$  Hz), 46.8 (d,  $^4J_{CF} = 9.0$  Hz), 22.4, 21.7.  $^{19}\text{F}$  NMR (376 MHz,  $\text{CDCl}_3$ ) ( $\delta$ , ppm) -97.1 (d,  $J = 251.9$  Hz, 1F), -99.1 (d,  $J = 251.9$  Hz, 1F). IR (KBr,  $\nu$ ,  $\text{cm}^{-1}$ ) 3253, 3083 1716, 1599, 1456, 1332, 1171, 1014, 970, 820, 799 HR-MS (ESI)  $m/z$  calcd for  $\text{C}_{21}\text{H}_{15}\text{ClF}_2\text{NO}_2$   $[\text{M}-\text{H}]^-$  386.0759, found 386.0758.

**1-(4-chlorophenyl)-4,4-difluoro-8-methoxy-5a-methyl-2,4,5,5a-tetrahydroindeno[1,2-c]azepine-3,6-dione (3u)**

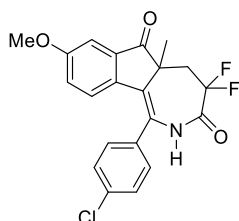

Isolation by column chromatography (petroleum ether/ ethyl acetate = 10/1 v/v) White solid, 48 mg, 60%; mp 237-238 °C  $^1\text{H}$  NMR (400 MHz, DMSO- $d_6$ ) ( $\delta$ , ppm) 10.26 (d,  $J = 4.0$  Hz, 1H), 7.69 - 7.47 (m, 5H), 7.18 (d,  $J = 2.4$  Hz, 1H), 7.14 - 7.11 (m, 1H), 6.50 (d,  $J = 8.8$  Hz, 1H), 3.80 (s, 3H), 2.75 - 2.65 (m, 2H), 1.53 (s, 3H).  $^{13}\text{C}$  NMR (100 MHz,  $\text{CDCl}_3$ ) ( $\delta$ , ppm) 204.2, 164.5 (t,  $^2J_{CF} = 30.0$  Hz), 160.8, 139.5, 136.5, 135.7, 133.5, 131.0, 130.6, 129.5, 129.4, 128.4 (d,  $^5J_{CF} = 30.0$  Hz), 125.3, 125.2, 114.9 (t,  $^1J_{CF} = 248.0$  Hz), 105.6, 55.8, 47.2 (d,  $^4J_{CF} = 9.0$  Hz), 46.6 (t,  $^3J_{CF} = 24.0$  Hz), 21.8.  $^{19}\text{F}$  NMR (376 MHz, DMSO- $d_6$ ) ( $\delta$ , ppm) -95.6 (d,  $J = 251.9$  Hz, 1F), -98.6 (d,  $J = 251.9$  Hz, 1F). IR (KBr,  $\nu$ ,  $\text{cm}^{-1}$ ) 3237, 3130, 1719, 1693, 1489, 1338, 1288, 1157, 1030, 939 850, 764 HR-MS (ESI)  $m/z$  calcd for  $\text{C}_{21}\text{H}_{15}\text{ClF}_2\text{NO}_3$   $[\text{M}-\text{H}]^-$  402.0709, found 402.0709.

**9-chloro-4,4-difluoro-5a-methyl-1-phenyl-2,4,5,5a-tetrahydroindeno[1,2-c]azepine-3,6-dione (3v)**

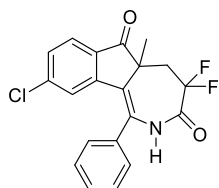

Isolation by column chromatography (petroleum ether/ ethyl acetate = 10/1 v/v) White solid, 51 mg, 68%; mp 230-232 °C

$^1\text{H}$  NMR (400 MHz,  $\text{CDCl}_3$ ) ( $\delta$ , ppm) 7.72 (d,  $J = 8.0$  Hz, 1H), 7.66 - 7.59 (m, 2H), 7.55 - 7.47 (m, 2H), 7.41 (d,  $J = 7.6$  Hz, 1H), 7.31 - 7.29 (m, 1H), 6.92 (d,  $J = 2.4$  Hz, 1H), 6.53 (d,  $J = 1.6$  Hz, 1H), 2.81 - 2.68 (m, 2H), 1.65 (s, 3H).  $^{13}\text{C}$  NMR (100 MHz,  $\text{CDCl}_3$ ) ( $\delta$ , ppm) 203.3, 164.3 (t,  $^2J_{\text{CF}} = 30.0$  Hz), 147.9, 142.1, 134.3, 133.5 (d,  $^5J_{\text{CF}} = 3.0$  Hz), 132.1, 131.1, 130.5, 129.5, 129.3, 129.2, 128.9, 127.5, 125.9, 124.4, 114.8 (t,  $^1J_{\text{CF}} = 248.0$  Hz), 46.8 (d,  $^4J_{\text{CF}} = 9.0$  Hz), 46.7 (t,  $^3J_{\text{CF}} = 24.0$  Hz), 21.9.  $^{19}\text{F}$  NMR (376 MHz,  $\text{CDCl}_3$ ) ( $\delta$ , ppm) -97.0 (d,  $J = 251.9$  Hz, 1F), -98.9 (d,  $J = 251.9$  Hz, 1F). IR (KBr,  $\nu$ ,  $\text{cm}^{-1}$ ) 3247, 1702, 1600, 1490, 1397, 1290, 1167, 1106, 1016, 835, 797 HR-MS (ESI)  $m/z$  calcd for  $\text{C}_{20}\text{H}_{13}\text{ClF}_2\text{NO}_2$   $[\text{M-H}]^-$  372.0603, found 372.0603.

**9-chloro-4,4-difluoro-5a-methyl-1-(*m*-tolyl)-2,4,5,5a-tetrahydroindeno[1,2-*c*]azepine-3,6-dione (3w)**

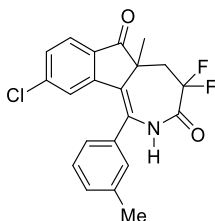

Isolation by column chromatography (petroleum ether/ ethyl acetate = 10/1 v/v) White solid, 33 mg, 43%; mp 214-216 °C  $^1\text{H}$  NMR (400 MHz,  $\text{CDCl}_3$ ) ( $\delta$ , ppm) 7.70 (d,  $J = 8.4$  Hz, 1H), 7.44 - 7.39 (m, 2H), 7.29 - 7.25 (m, 3H), 7.12 (d,  $J = 3.6$  Hz, 1H), 6.63 (d,  $J = 1.2$  Hz, 1H), 2.75 - 2.62 (m, 2H), 2.48 (s, 3H), 1.61 (s, 3H).  $^{13}\text{C}$  NMR (100 MHz,  $\text{DMSO-}d_6$ ) ( $\delta$ , ppm) 203.5, 164.5 (t,  $^2J_{\text{CF}} = 29.0$  Hz), 146.0, 140.4, 135.7, 135.2, 135.0 (d,  $^6J_{\text{CF}} = 3.0$  Hz), 133.7, 132.6, 131.0, 130.0 (d,  $^4J_{\text{CF}} = 9.0$  Hz), 128.9, 127.5, 126.5, 125.6, 124.2, 115.8 (t,  $^1J_{\text{CF}} = 248.0$  Hz), 46.9 (d,  $^4J_{\text{CF}} = 9.0$  Hz), 46.5 (t,  $^3J_{\text{CF}} = 25.0$  Hz), 21.5, 21.4.  $^{19}\text{F}$  NMR (376 MHz,  $\text{CDCl}_3$ ) ( $\delta$ , ppm) -97.1 (d,  $J = 251.9$  Hz, 1F), -99.0 (d,  $J = 251.9$  Hz, 1F). IR (KBr,  $\nu$ ,  $\text{cm}^{-1}$ ) 3255, 3150, 1704, 1651, 1591, 1395, 1269, 1165, 1031, 973, 824, 790 HR-MS (ESI)  $m/z$  calcd for  $\text{C}_{21}\text{H}_{15}\text{ClF}_2\text{NO}_2$   $[\text{M-H}]^-$  386.0759, found 386.0732.

**9-chloro-1-(4-ethylphenyl)-4,4-difluoro-5a-methyl-2,4,5,5a-tetrahydroindeno[1,2-*c*]azepine-3,6-dione (3x)**

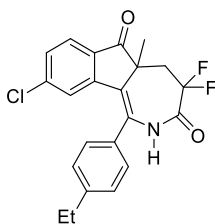

Isolation by column chromatography (petroleum ether/ ethyl acetate = 10/1 v/v) White solid, 45 mg, 56%; mp 159-160 °C  $^1\text{H}$  NMR (400 MHz,  $\text{CDCl}_3$ ) ( $\delta$ , ppm) 7.70 (d,  $J = 8.0$  Hz, 1H), 7.44 (s, 2H), 7.30 - 7.29 (m, 3H), 6.99 (s, 1H), 6.56 (d,  $J = 1.6$  Hz, 1H), 2.80 - 2.77 (m, 2H), 2.75 - 2.70 (m, 1H), 2.67 - 2.64 (m, 1H), 1.63 (s, 3H), 1.32 (t,  $J = 7.6$  Hz, 3H).  $^{13}\text{C}$  NMR (100 MHz,  $\text{CDCl}_3$ ) ( $\delta$ , ppm) 203.4, 164.4 (t,  $^2J_{\text{CF}} = 30.0$  Hz), 148.1, 147.8, 142.1, 133.7 (d,  $^5J_{\text{CF}} = 3.0$  Hz), 132.0, 131.6, 130.0, 129.3, 129.3, 129.0, 128.8, 127.2, 125.8, 124.4, 114.8 (t,  $^1J_{\text{CF}} = 248.0$  Hz), 46.8(7) (d,  $^4J_{\text{CF}} = 9.0$  Hz), 46.8(6) (t,  $^3J_{\text{CF}} = 24.0$  Hz), 28.9, 21.8, 15.6.  $^{19}\text{F}$  NMR (376 MHz,  $\text{CDCl}_3$ ) ( $\delta$ , ppm) -96.9 (d,  $J = 251.9$  Hz, 1F), -98.9 (d,  $J = 251.9$  Hz, 1F). IR (KBr,  $\nu$ ,  $\text{cm}^{-1}$ ) 3247, 1702, 1600, 1490, 1397, 1290, 1167, 1106, 1016, 835, 797 HR-MS (ESI)  $m/z$  calcd for  $\text{C}_{22}\text{H}_{17}\text{ClF}_2\text{NO}_2$   $[\text{M-H}]^-$  400.0916, found 400.0910.

**1-(4-*tert*-butylphenyl)-4,4-difluoro-5a,9-dimethyl-2,4,5,5a-tetrahydroindeno[1,2-*c*]azepine-3,6-dione (3y)**

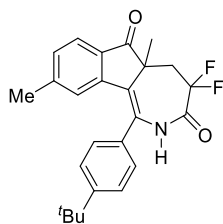

Isolation by column chromatography (petroleum ether/ ethyl acetate = 10/1 v/v) White solid, 35 mg, 43%; mp 242-244 °C <sup>1</sup>H NMR (400 MHz, CDCl<sub>3</sub>) (δ, ppm) 7.68 - 7.63 (m, 2H), 7.45 (d, *J* = 7.2 Hz, 2H), 7.34 (d, *J* = 7.2 Hz, 1H), 7.14 (d, *J* = 7.6 Hz, 1H), 6.93 (s, 1H), 6.32 (s, 1H), 2.78 - 2.64 (m, 2H), 2.12 (s, 3H), 1.63 (s, 3H), 1.40 (s, 9H). <sup>13</sup>C NMR (100 MHz, CDCl<sub>3</sub>) (δ, ppm) 204.3, 164.7 (t, <sup>2</sup>*J*<sub>CF</sub> = 30.0 Hz), 154.3, 147.2, 146.5, 132.2, 132.0, 131.8, 130.3, 129.4, 128.8, 128.7, 127.1, 126.0, 124.8, 124.7, 115.1 (t, <sup>1</sup>*J*<sub>CF</sub> = 248.0 Hz), 46.9 (t, <sup>3</sup>*J*<sub>CF</sub> = 22.0 Hz), 46.8, 35.1, 31.4, 22.4, 21.9. <sup>19</sup>F NMR (376 MHz, CDCl<sub>3</sub>) (δ, ppm) -96.9 (d, *J* = 251.9 Hz, 1F), -99.0 (d, *J* = 251.9 Hz, 1F). IR (KBr, ν, cm<sup>-1</sup>) 3231, 3138, 1716, 1697, 1599, 1397, 1331, 1257, 1168, 1105, 1033, 831, 796 HR-MS (ESI) *m/z* calcd for C<sub>25</sub>H<sub>24</sub>F<sub>2</sub>NO<sub>2</sub> [M-H]<sup>-</sup> 408.1775, found 408.1770.

**4,4-difluoro-5a-methyl-1-(p-tolyl)-8-(trifluoromethyl)-2,4,5,5a-tetrahydroindeno[1,2-c]azepine-3,6-dione (3z)**

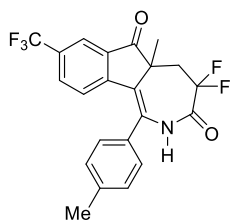

Isolation by column chromatography (petroleum ether/ ethyl acetate = 10/1 v/v) White solid, 52 mg, 62%; mp 199-201 °C <sup>1</sup>H NMR (400 MHz, CDCl<sub>3</sub>) (δ, ppm) 8.03 (s, 1H), 7.54 (d, *J* = 8.4 Hz, 1H), 7.43 (s, 2H), 7.30 - 7.28 (m, 1H), 7.24 (s, 1H), 7.07 (s, 1H), 6.79 (d, *J* = 8.4 Hz, 1H), 2.83 - 2.62 (m, 2H), 2.48 (s, 3H), 1.65 (s, 3H). <sup>13</sup>C NMR (100 MHz, CDCl<sub>3</sub>) (δ, ppm) 203.70, 164.43 (t, <sup>4</sup>*J*<sub>CF</sub> = 30.0 Hz), 149.62, 141.57, 134.91 (d, <sup>8</sup>*J*<sub>CF</sub> = 3.0 Hz), 133.85, 131.68 (dd, <sup>8</sup>*J*<sub>CF</sub> = 3.0 Hz), 131.43 (t, <sup>5</sup>*J*<sub>CF</sub> = 25.0 Hz), 130.90 (t, <sup>3</sup>*J*<sub>CF</sub> = 33.0 Hz), 130.04, 129.24, 128.68, 127.52 (t, <sup>1</sup>*J*<sub>CF</sub> = 272.0 Hz), 127.02, 124.92, 124.80, 122.06 (dd, <sup>7</sup>*J*<sub>CF</sub> = 4.0 Hz), 114.75 (t, <sup>2</sup>*J*<sub>CF</sub> = 248.0 Hz), 47.01, 46.67 (t, <sup>6</sup>*J*<sub>CF</sub> = 24.0 Hz), 21.79, 21.60. <sup>19</sup>F NMR (376 MHz, CDCl<sub>3</sub>) (δ, ppm) -62.88, -97.0 (d, *J* = 251.9 Hz, 1F), -99.1 (d, *J* = 251.9 Hz, 1F). IR (KBr, ν, cm<sup>-1</sup>) 3227, 3132, 1725, 1697, 1618, 1513, 1405, 1337, 1243, 1170, 1127, 1028, 918, 829, 760. HR-MS (ESI) *m/z* calcd for C<sub>22</sub>H<sub>17</sub>F<sub>5</sub>NO<sub>2</sub> [M+H]<sup>+</sup> 422.1179, found 422.1164.

**4,4-difluoro-5a-methyl-3,6-dioxo-1-(p-tolyl)-2,3,4,5,5a,6-hexahydroindeno[1,2-c]azepine-8-carbonitrile (3aa)**

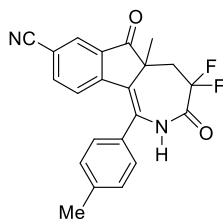

Isolation by column chromatography (petroleum ether/ ethyl acetate = 10/1 v/v) Yellow solid, 45 mg, 60%; mp 263-265 °C <sup>1</sup>H NMR (400 MHz, CDCl<sub>3</sub>) (δ, ppm) 8.04 (s, 1H), 7.51 (d, *J* = 8.4 Hz, 1H), 7.48 - 7.40 (m, 2H), 7.26 (s, 2H), 7.01 (d, *J* = 2.8 Hz, 1H), 6.77 (d, *J* = 8.4 Hz, 1H), 2.82 - 2.61 (m, 2H), 2.49 (s, 3H), 1.65 (s, 3H). <sup>13</sup>C NMR (100 MHz, CDCl<sub>3</sub>) (δ,

ppm) 203.0, 164.3 (t,  $^2J_{CF} = 30.0$  Hz), 150.1, 141.9, 137.5, 136.2 (t,  $^5J_{CF} = 3.0$  Hz), 133.9, 131.3, 131.1, 130.1, 129.2, 129.1, 128.7, 126.6, 125.1, 117.7, 114.7 (t,  $^1J_{CF} = 248.0$  Hz), 112.0, 46.9 (t,  $^4J_{CF} = 8.0$  Hz), 46.7 (t,  $^3J_{CF} = 24.0$  Hz), 21.8, 21.6.  $^{19}\text{F}$  NMR (376 MHz,  $\text{CDCl}_3$ ) ( $\delta$ , ppm) -97.0 (d,  $J = 255.7$  Hz, 1F), -99.0 (d,  $J = 255.7$  Hz, 1F). IR (KBr,  $\nu$ ,  $\text{cm}^{-1}$ ) 3237, 3137, 2232, 1724, 1698, 1604, 1401, 1345, 1249, 1177, 1031, 915, 828. HR-MS (ESI)  $m/z$  calcd for  $\text{C}_{22}\text{H}_{16}\text{F}_2\text{N}_2\text{NaO}_2$   $[\text{M}+\text{Na}]^+$  401.1078, found 401.1070.

**4,4-difluoro-6-hydroxy-5a-methyl-1-phenyl-4,5,5a,6-tetrahydroindeno[1,2-c]azepin-3(2H)-one (5a)**

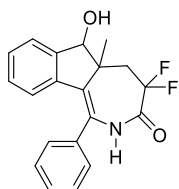

Isolation by column chromatography (petroleum ether/ ethyl acetate = 5/1 v/v) White solid, 47 mg, 68%; mp 120-122 °C  $^1\text{H}$  NMR (400 MHz,  $\text{CDCl}_3$ ) ( $\delta$ , ppm) 7.52 - 7.44 (m, 4H), 7.37 (d,  $J = 7.6$  Hz, 1H), 7.23 - 7.19 (m, 1H), 6.98 - 6.94 (m, 1H), 6.69 (s, 1H), 6.44 (d,  $J = 8.0$  Hz, 1H), 5.07 (s, 1H), 3.10 - 3.04 (m, 1H), 2.53 - 2.46 (m, 1H), 1.73 (s, 3H).  $^{13}\text{C}$  NMR (100 MHz,  $\text{CDCl}_3$ ) ( $\delta$ , ppm) 165.36 (t,  $^2J_{CF} = 30.0$  Hz), 144.39, 136.73, 135.68, 134.16, 130.42, 130.39, 130.04, 128.77, 128.76, 124.49, 123.66, 115.69 (t,  $^1J_{CF} = 248.0$  Hz), 83.10, 48.18 (t,  $^4J_{CF} = 9.0$  Hz), 47.89 (t,  $^3J_{CF} = 24.0$  Hz), 29.74, 25.43.  $^{19}\text{F}$  NMR (376 MHz,  $\text{CDCl}_3$ ) ( $\delta$ , ppm) -95.5 (d,  $J = 251.9$  Hz, 1F), -98.0 (d,  $J = 251.9$  Hz, 1F). IR (KBr,  $\nu$ ,  $\text{cm}^{-1}$ ) 3227, 2925, 1693, 1598, 1461, 1324, 1168, 1115, 1056, 913, 770. HR-MS (ESI)  $m/z$  calcd for  $\text{C}_{20}\text{H}_{17}\text{F}_2\text{NNaO}_2$   $[\text{M}+\text{Na}]^+$  364.1125, found 364.1122.

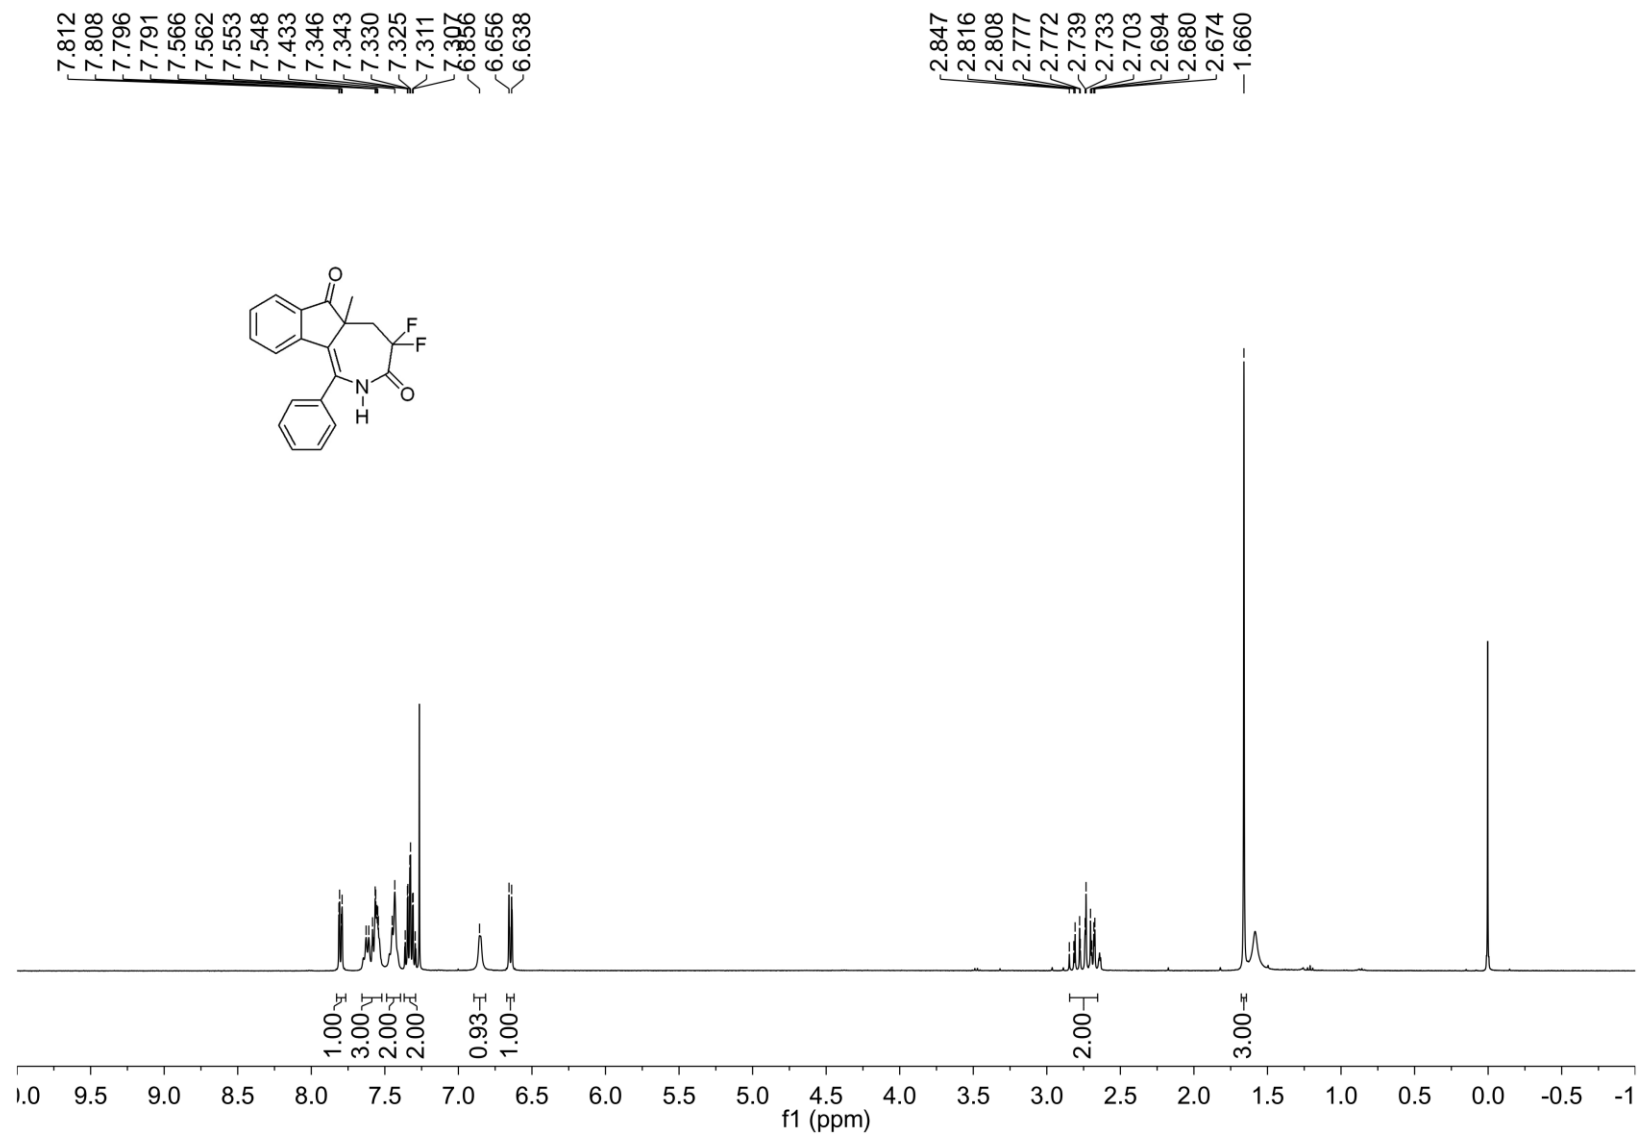

<sup>1</sup>H NMR Spectrum of Compound 3a

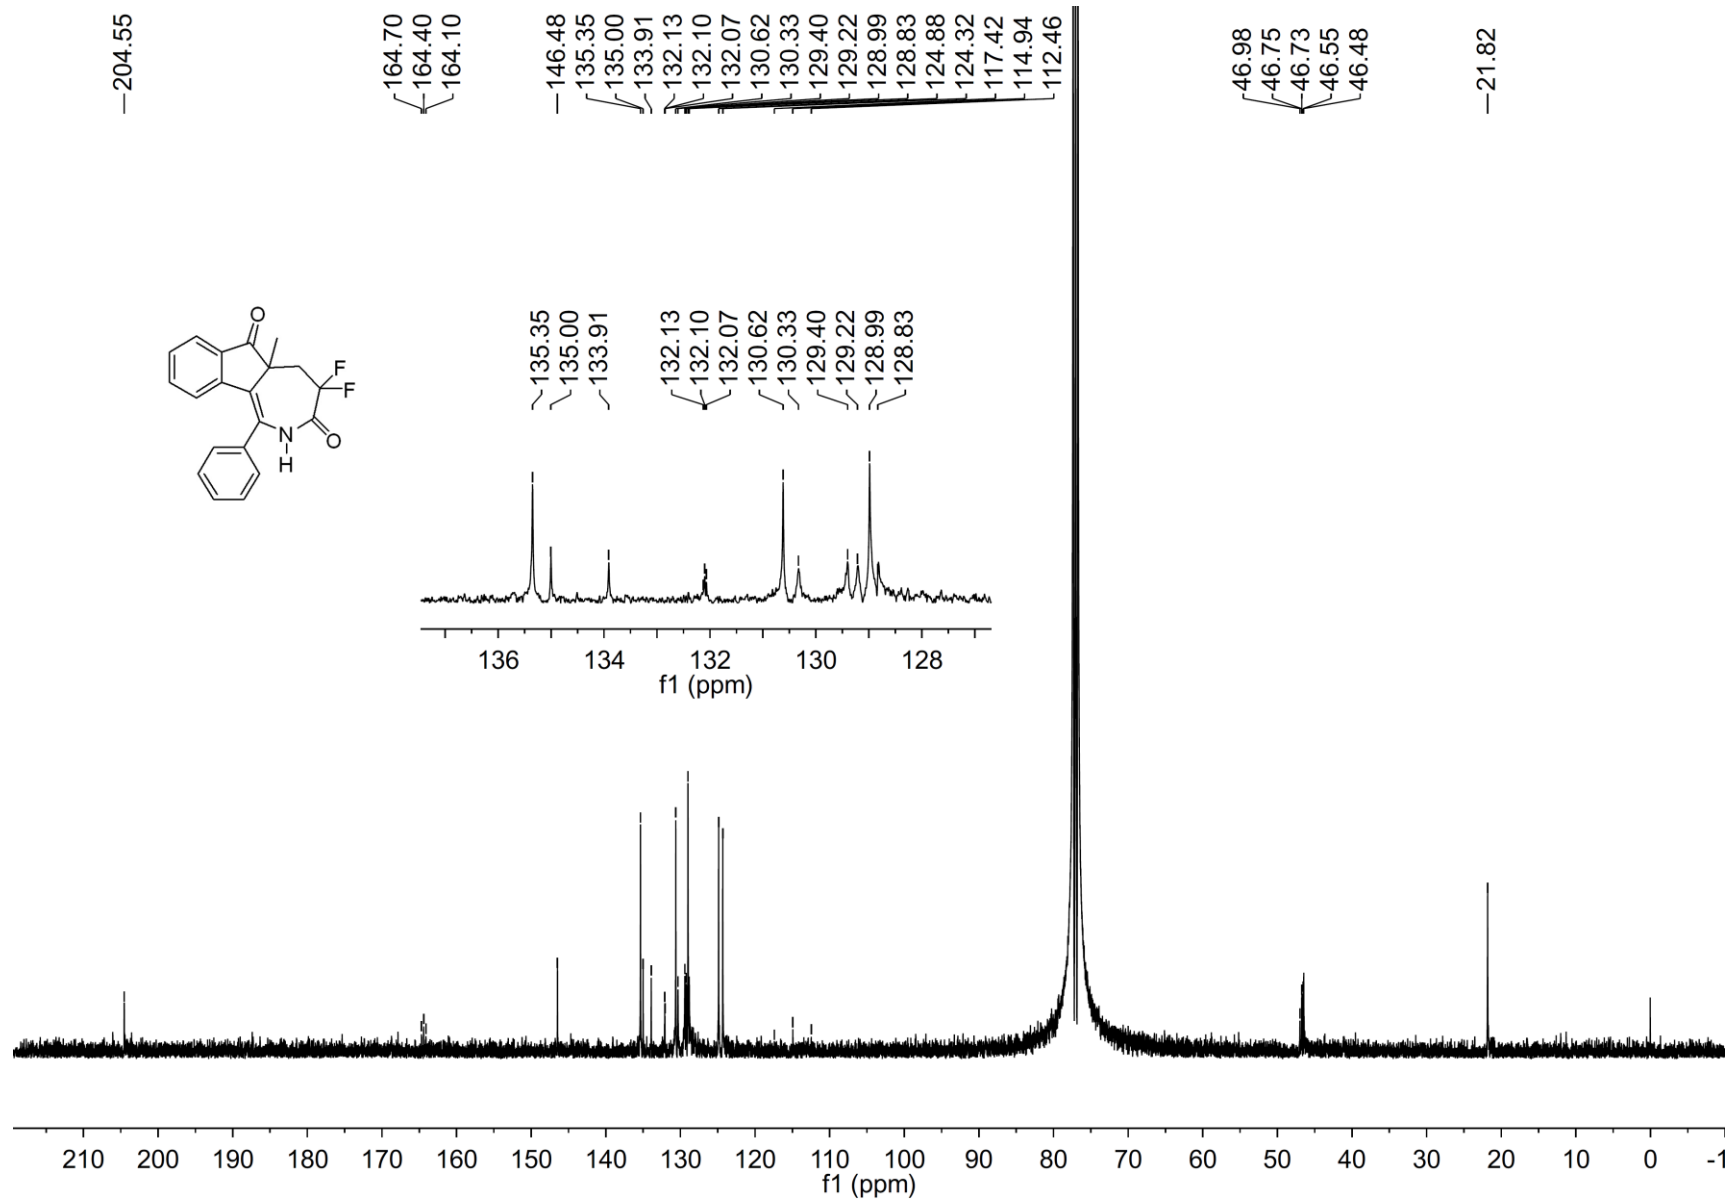

**<sup>13</sup>C NMR Spectrum of Compound 3a**

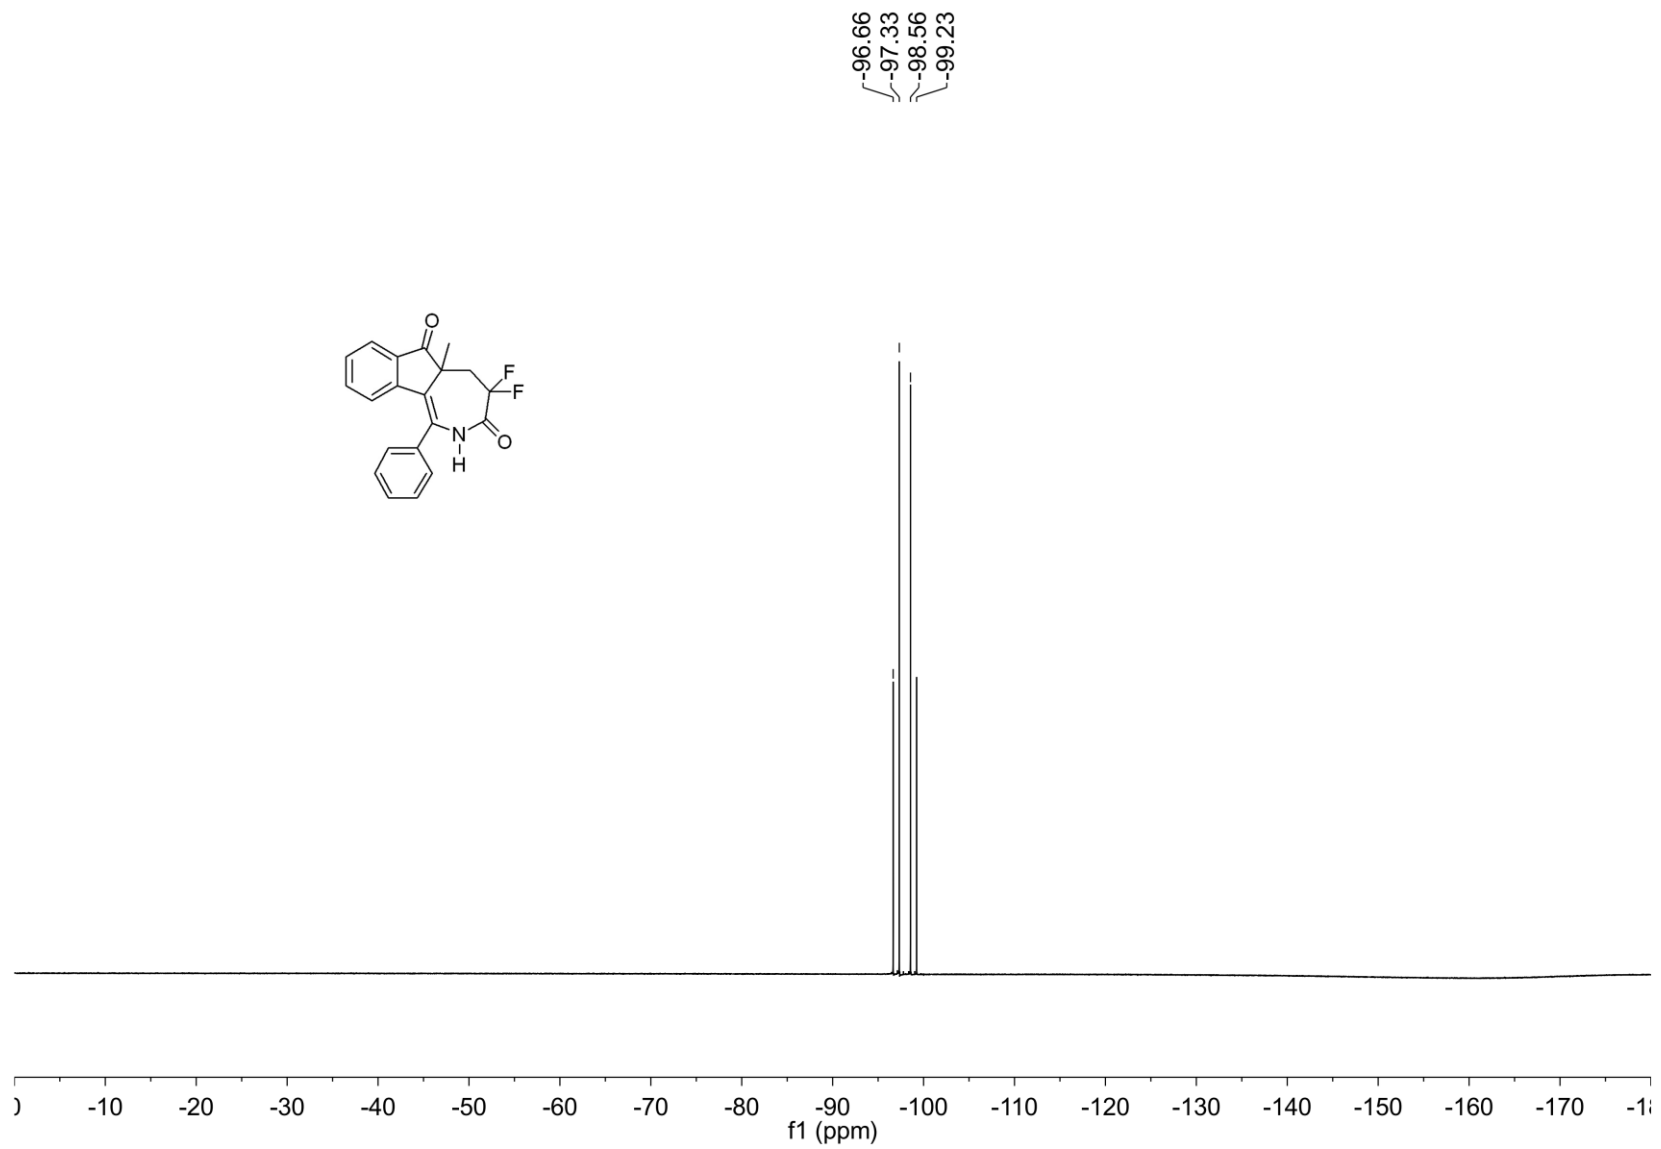

$^{19}\text{F}$  NMR Spectrum of Compound 3a

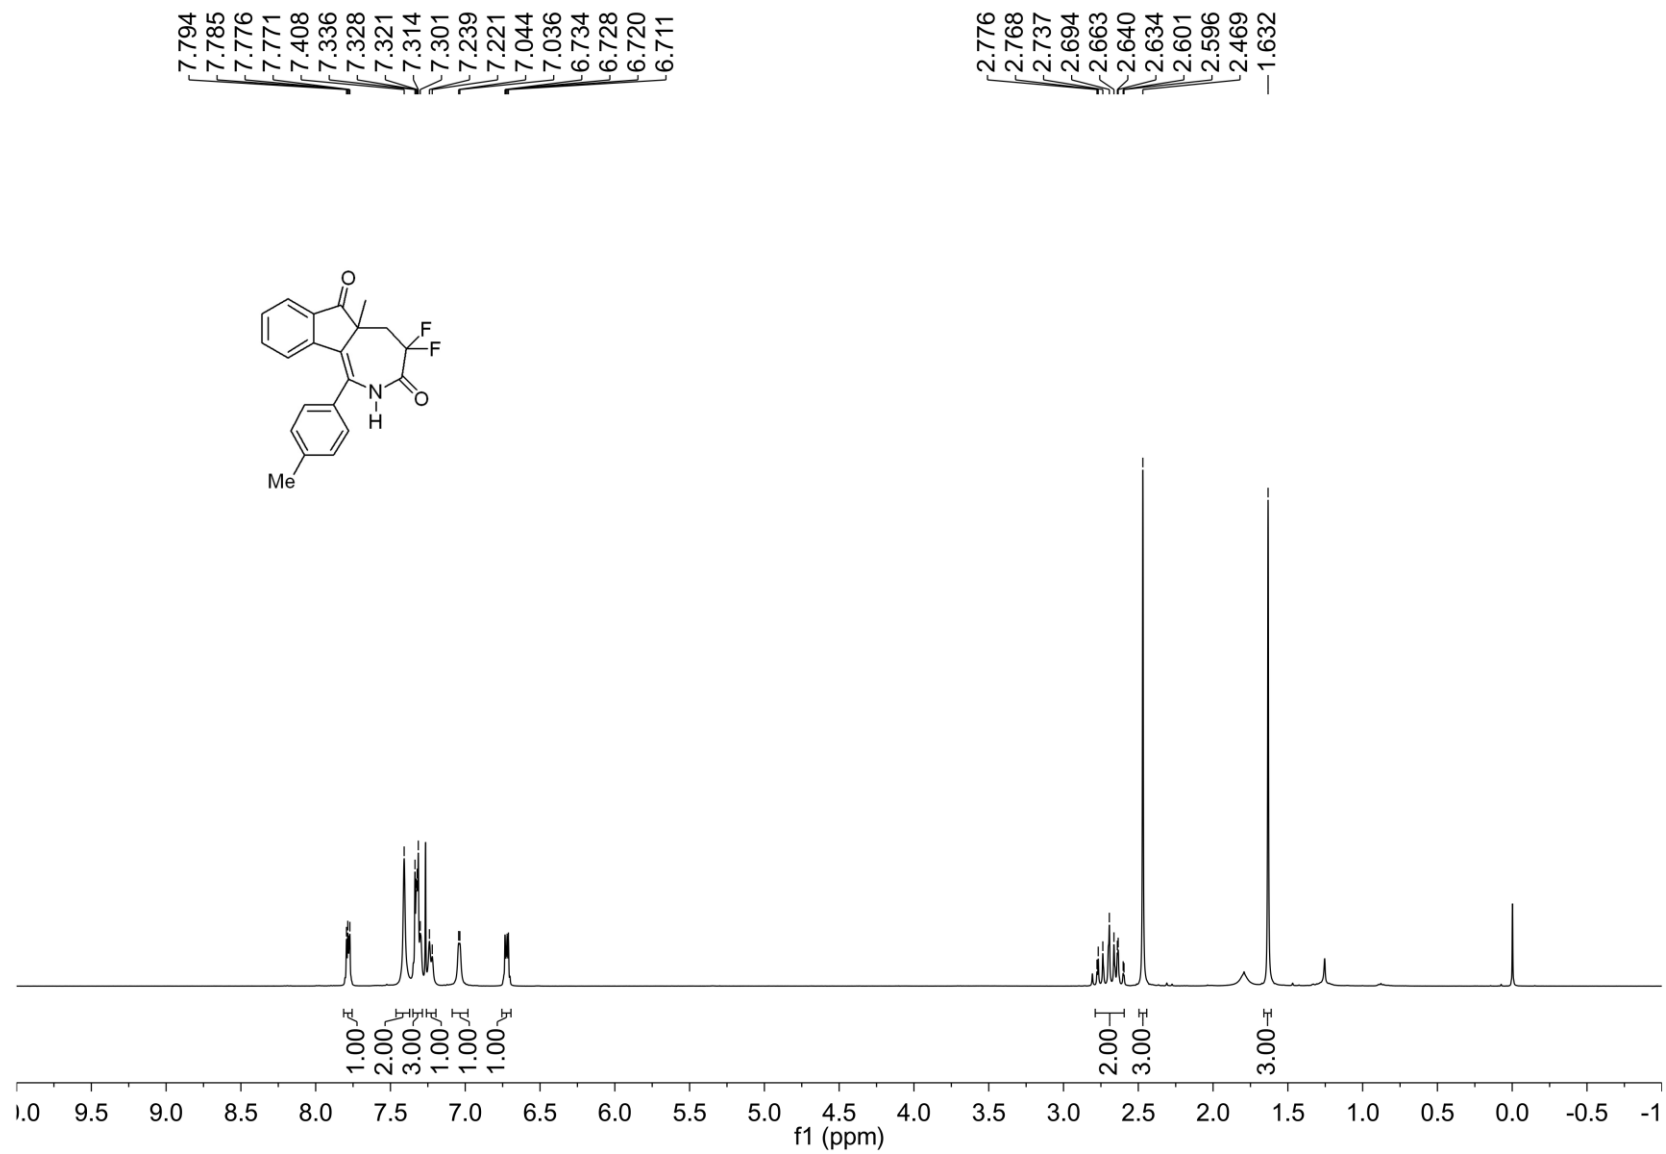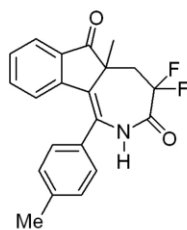

<sup>1</sup>H NMR Spectrum of Compound 3b



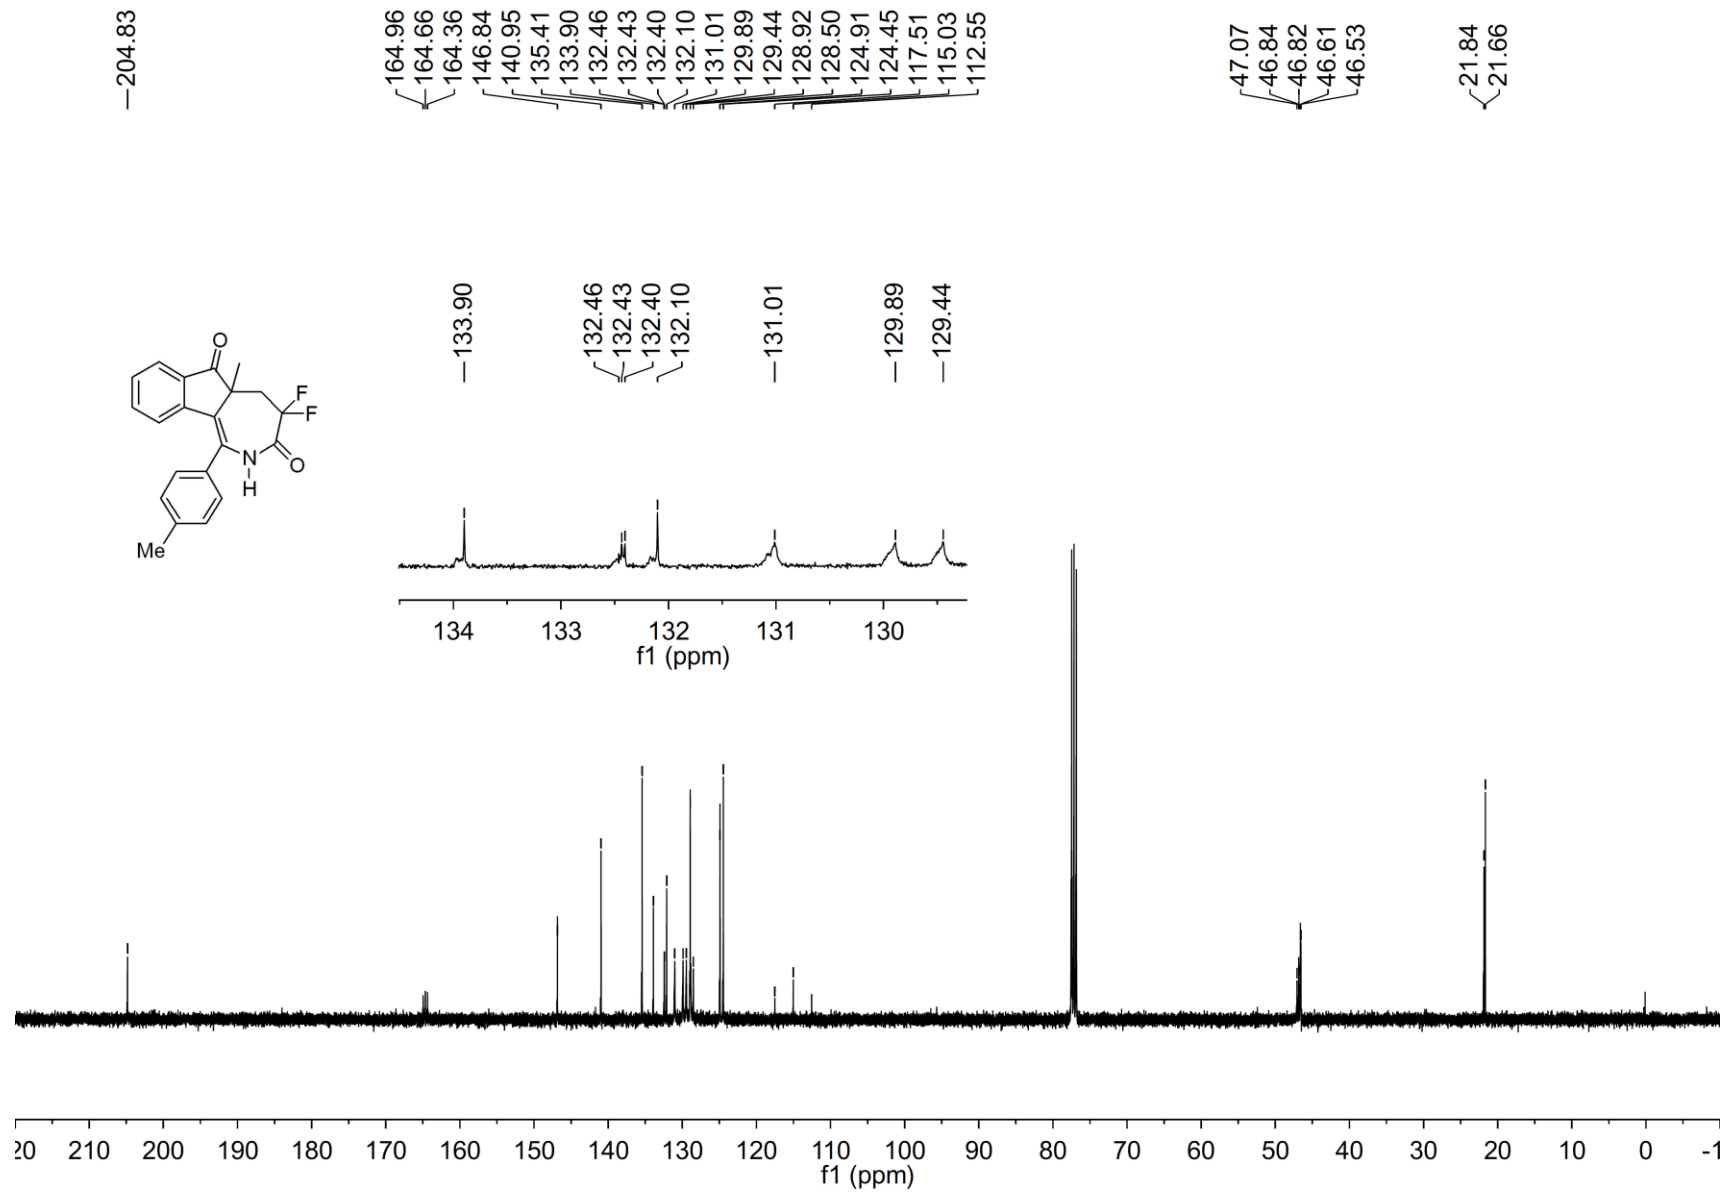

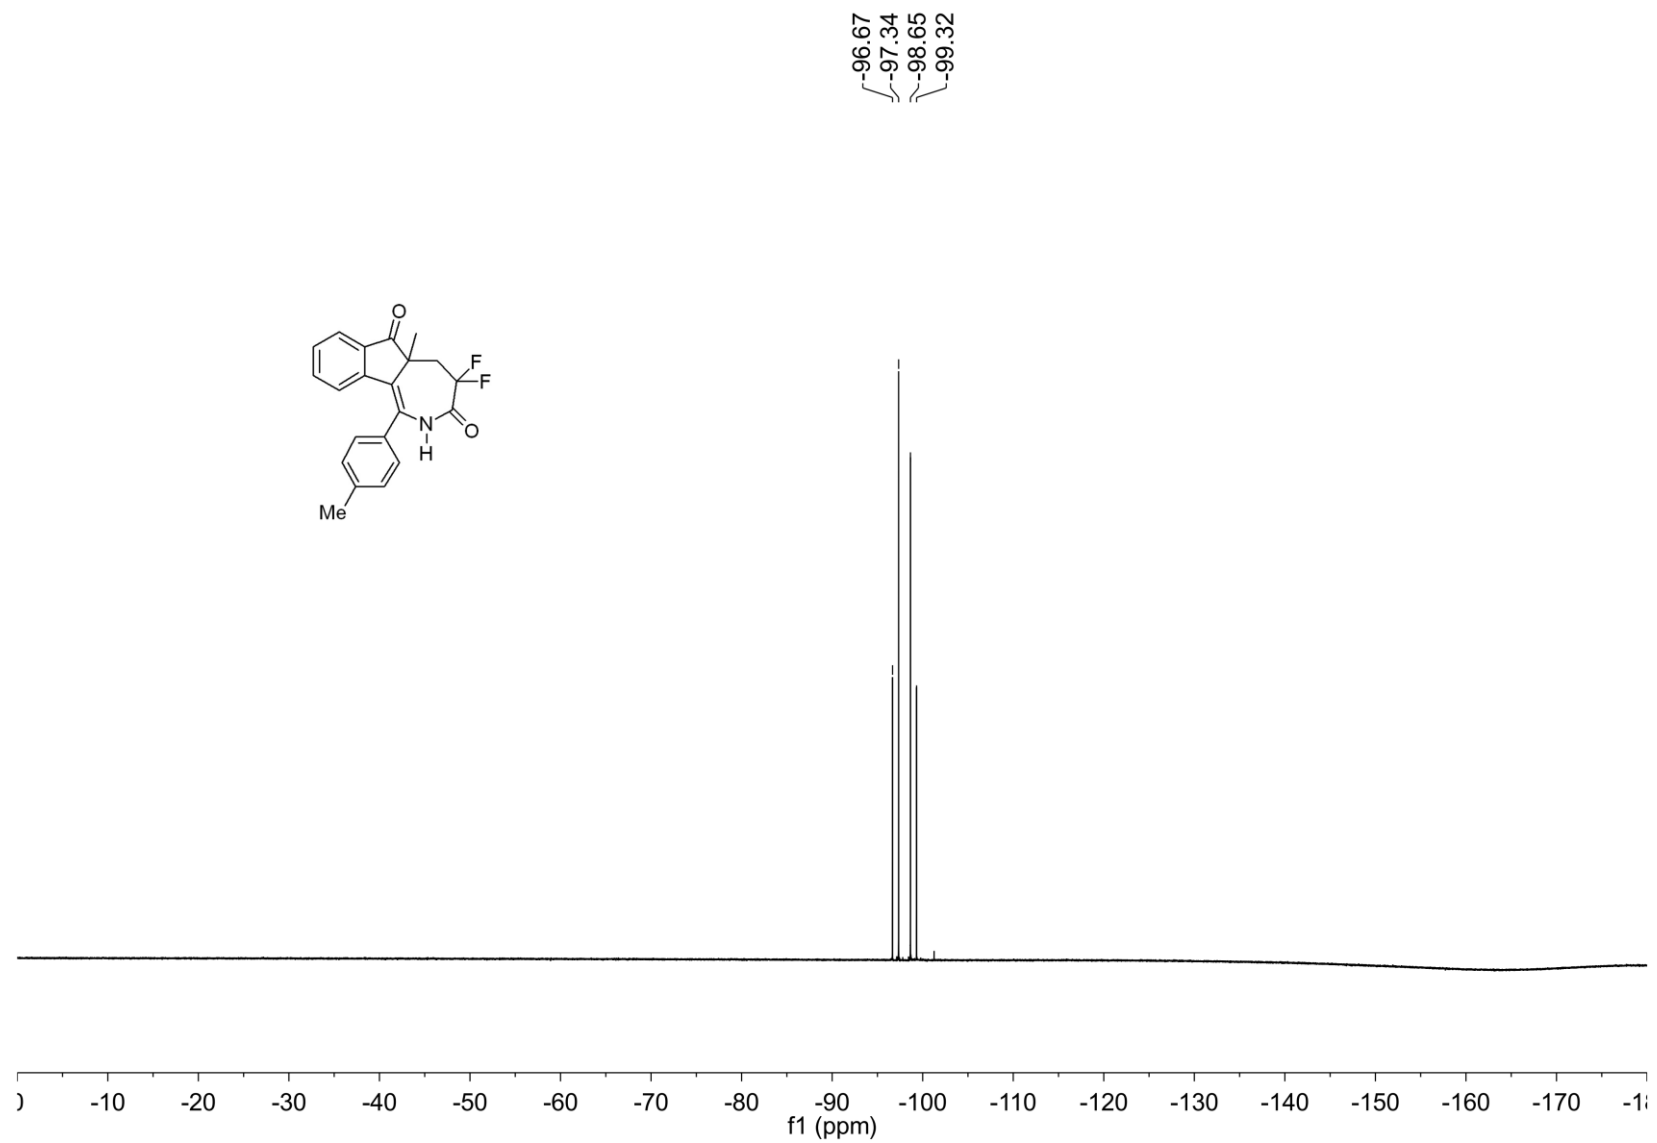

$^{19}\text{F}$  NMR Spectrum of Compound 3b

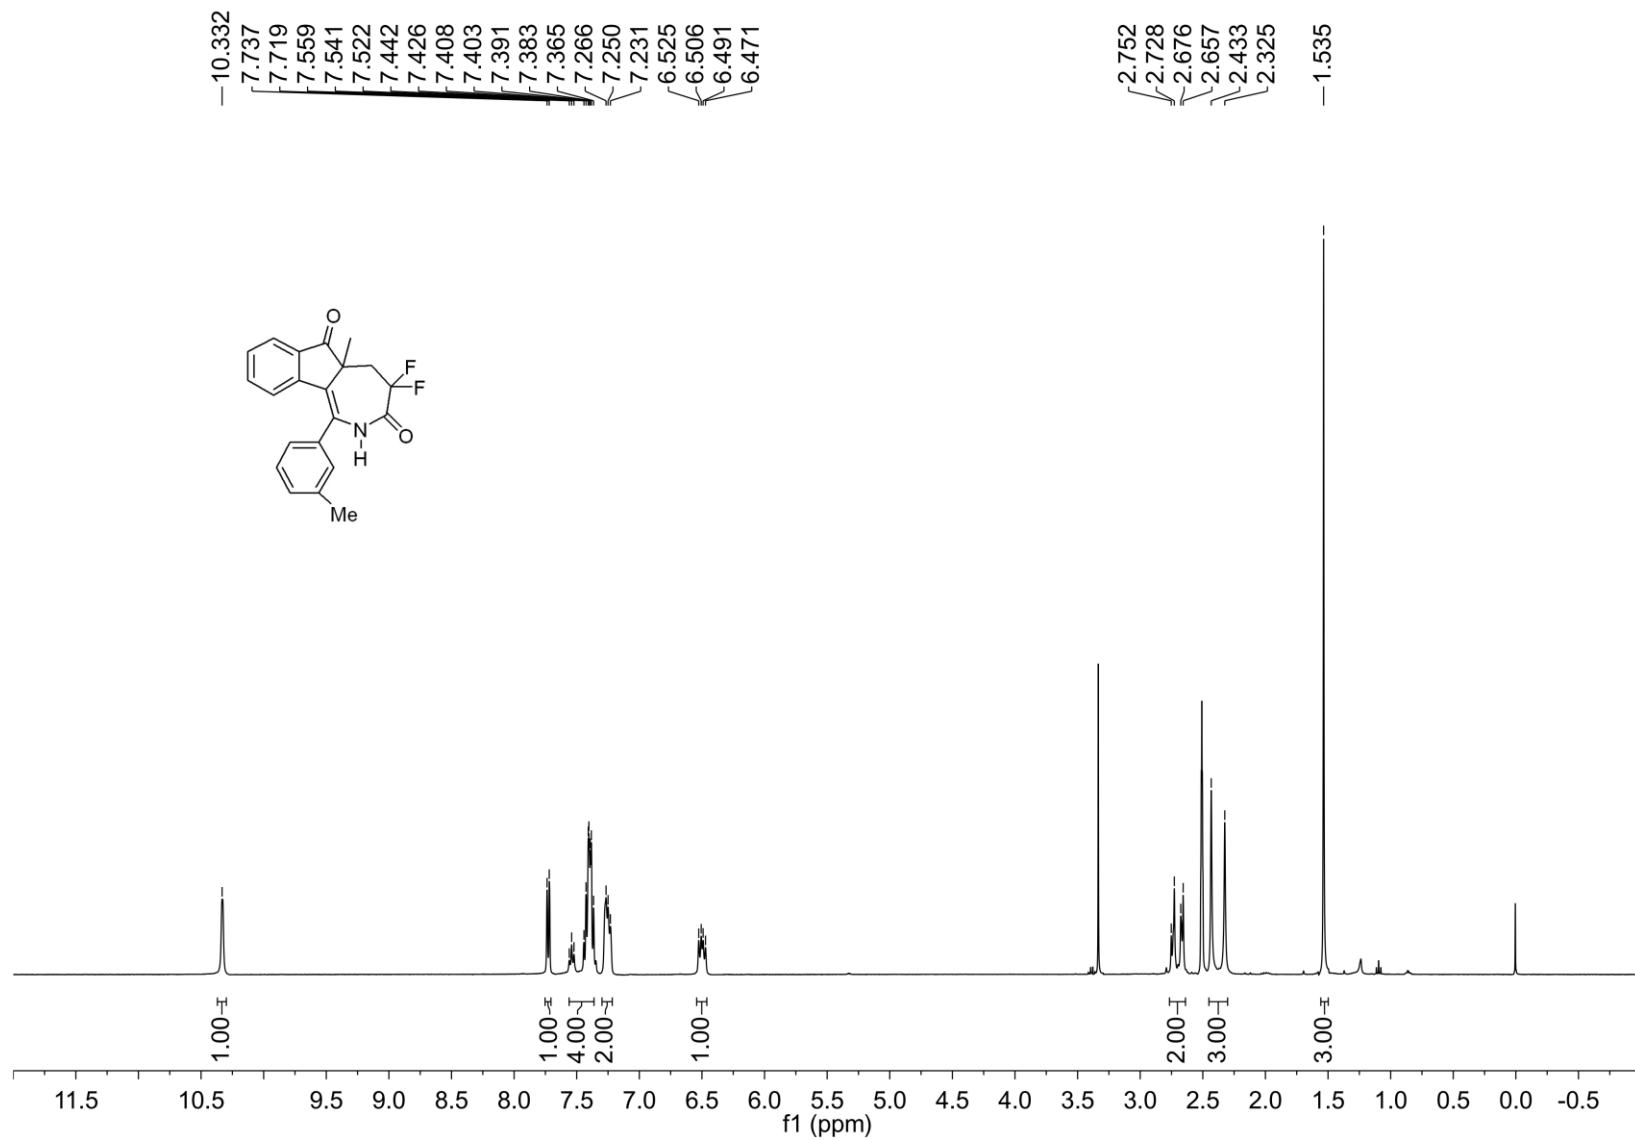

<sup>1</sup>H NMR Spectrum of Compound 3c

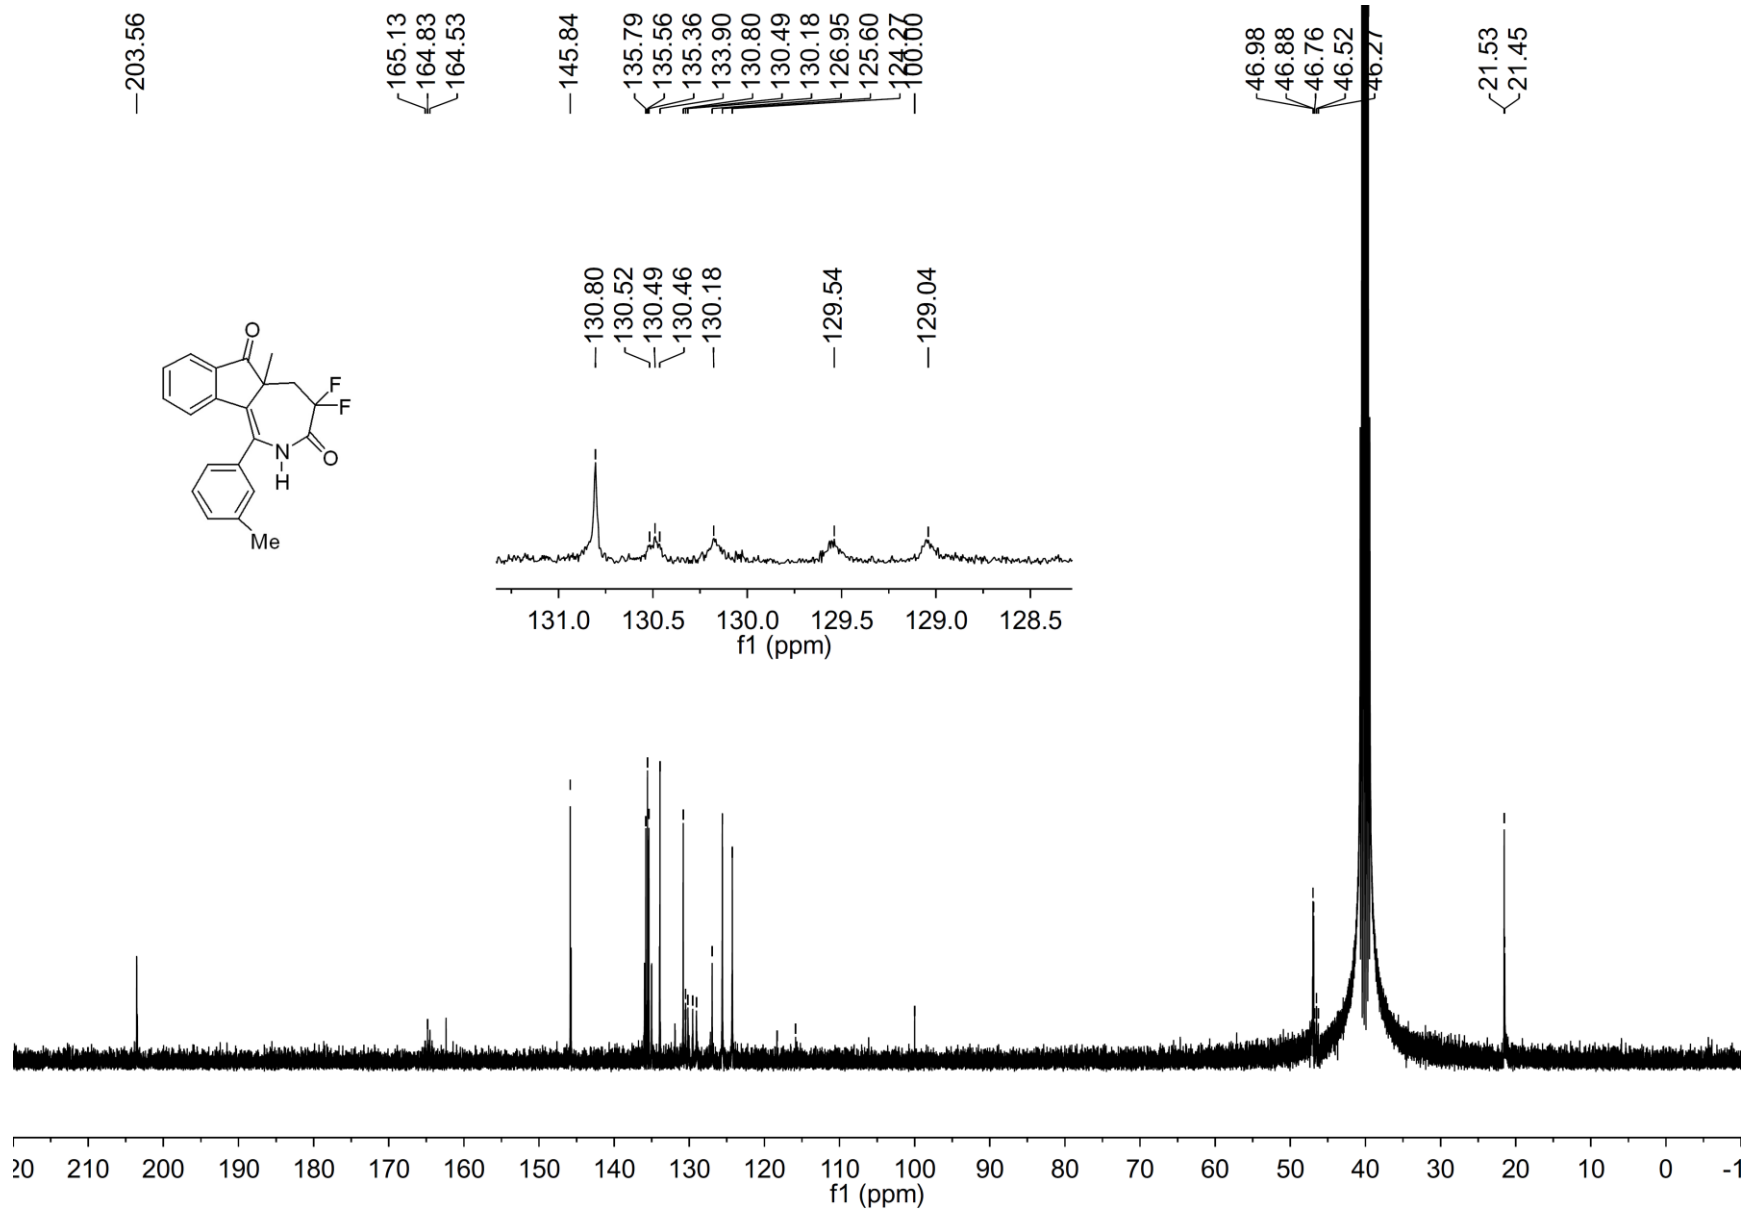

<sup>13</sup>C NMR Spectrum of Compound 3c

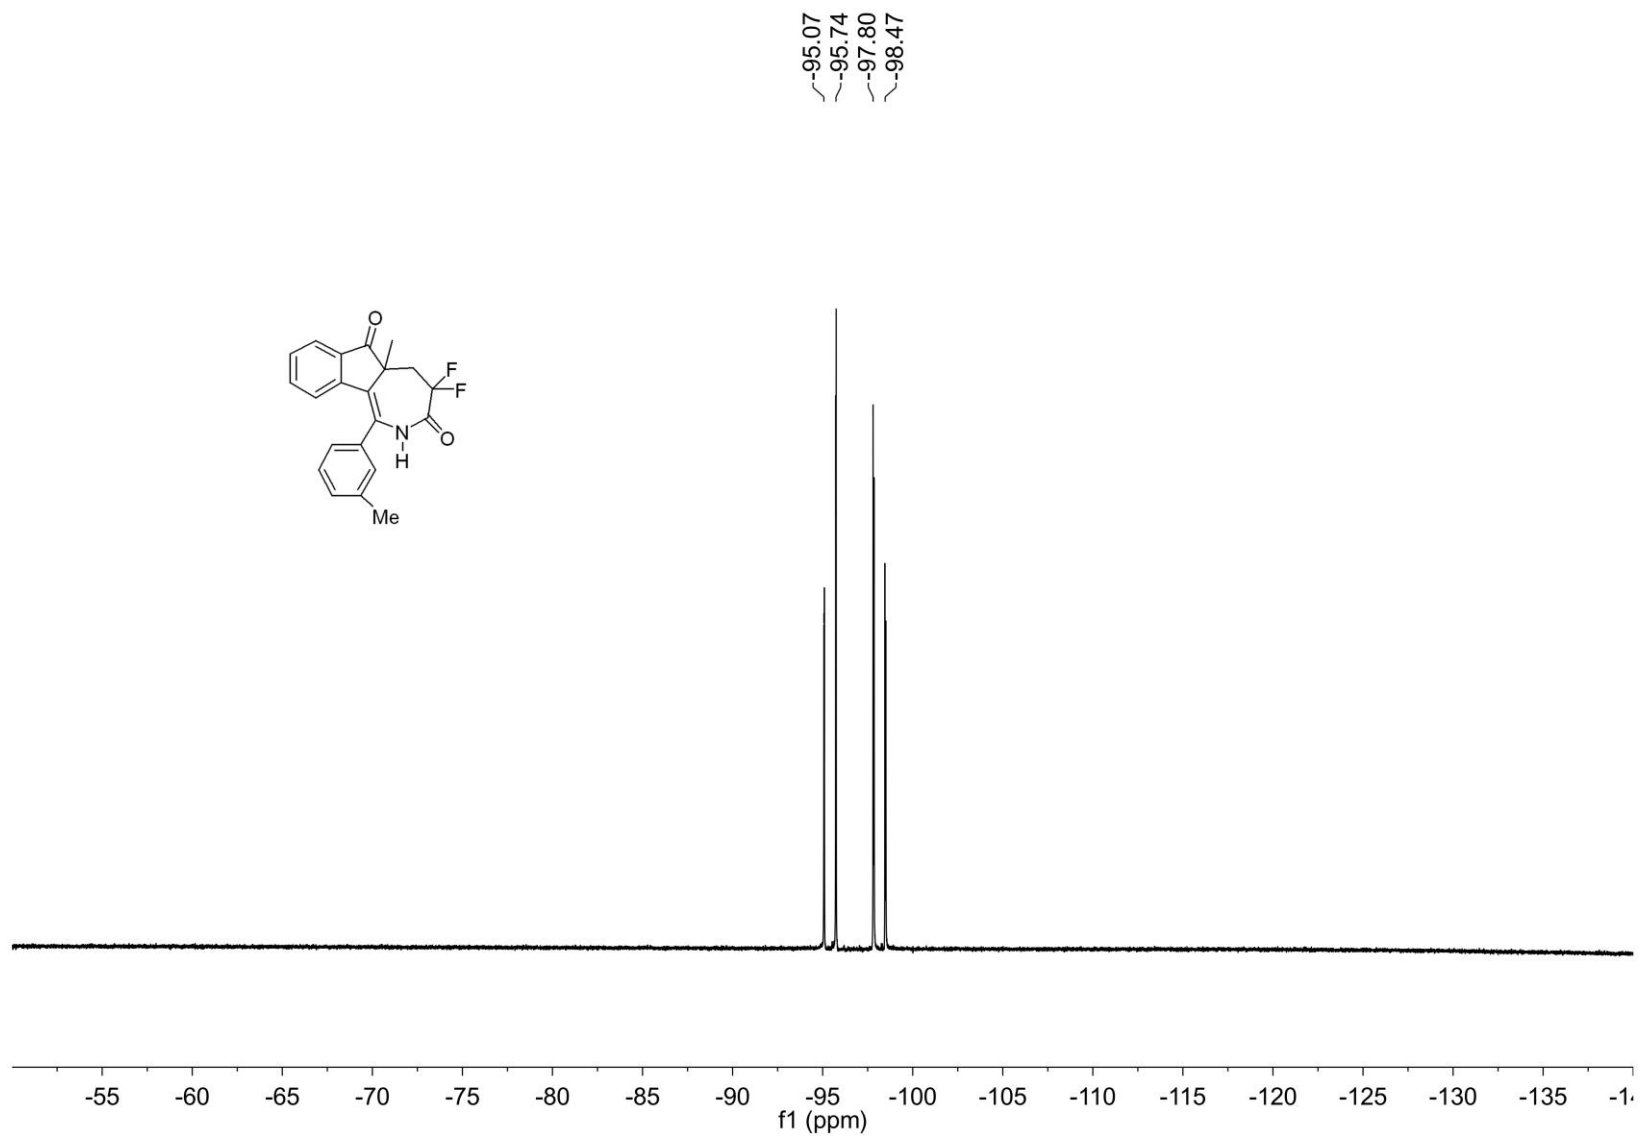

$^{19}\text{F}$  NMR Spectrum of Compound 3c

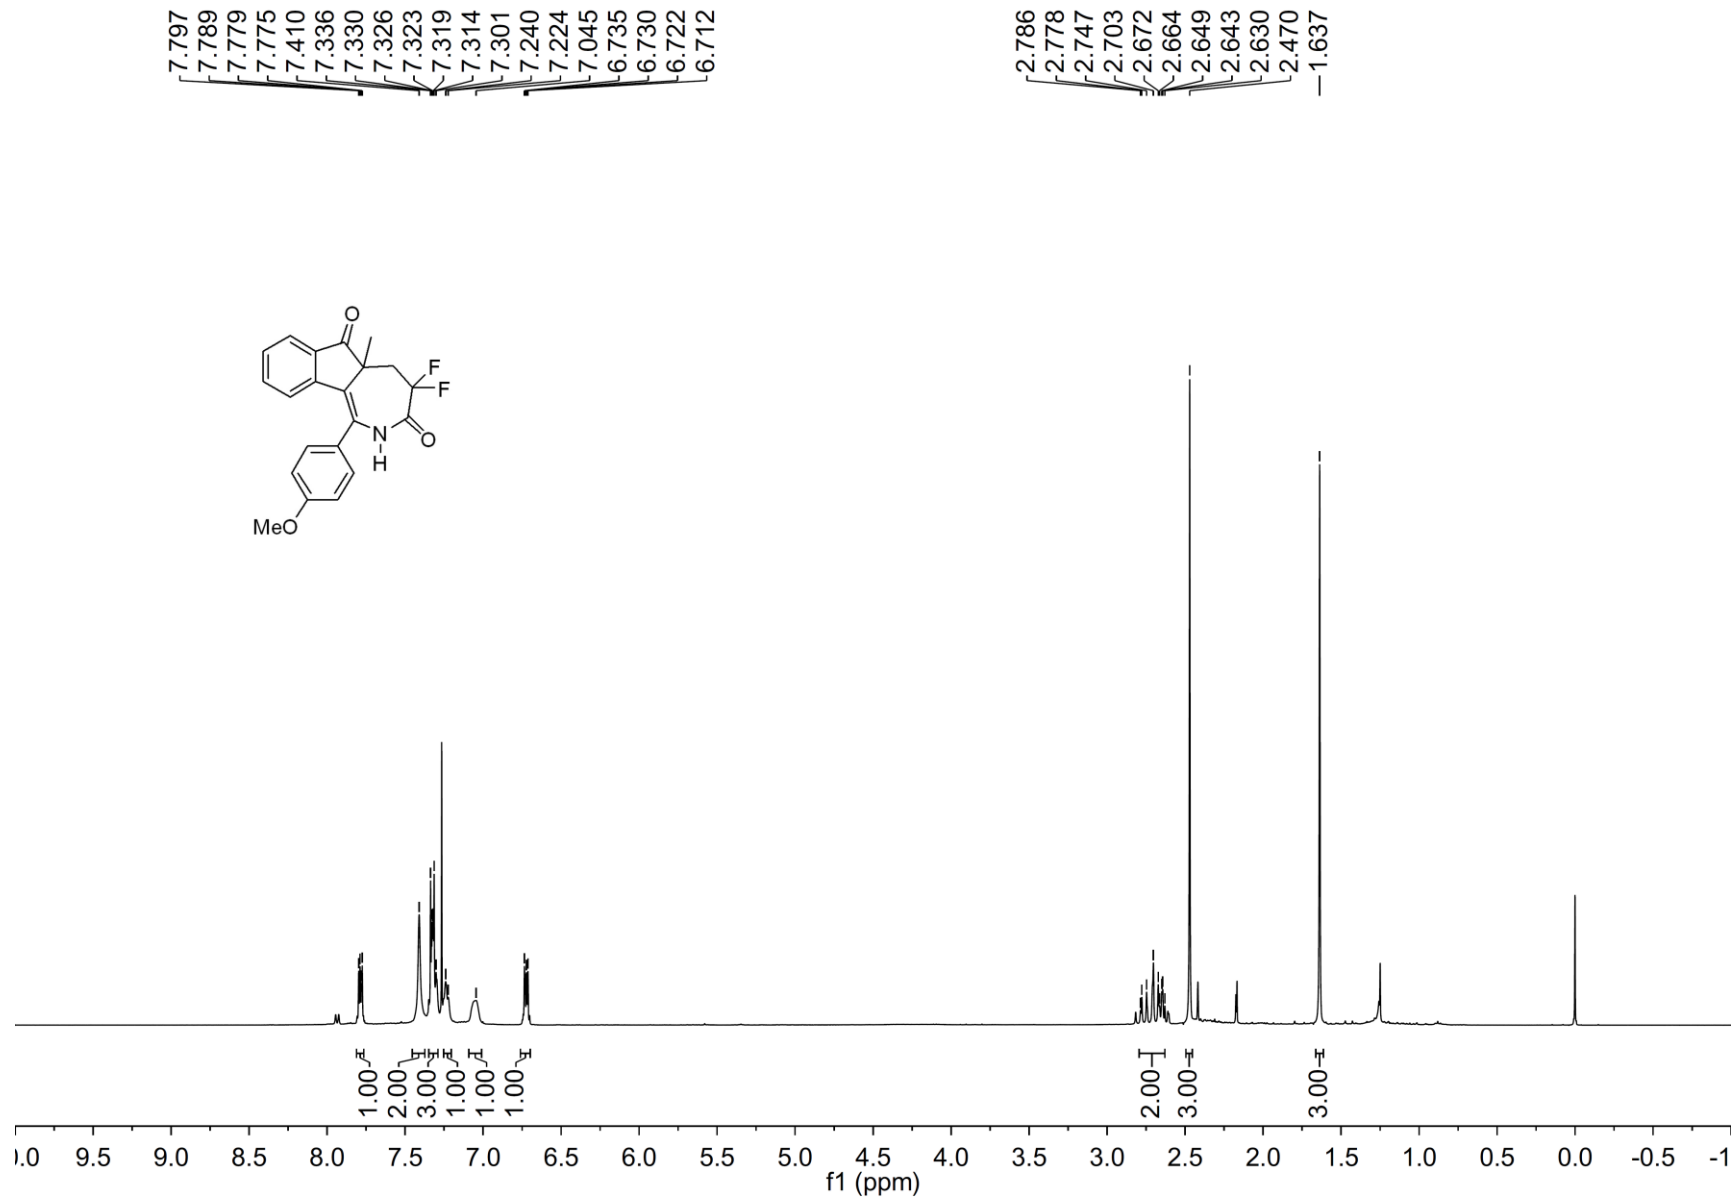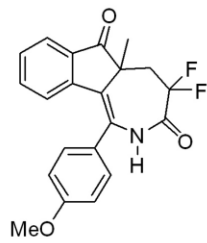

<sup>1</sup>H NMR Spectrum of Compound 3d

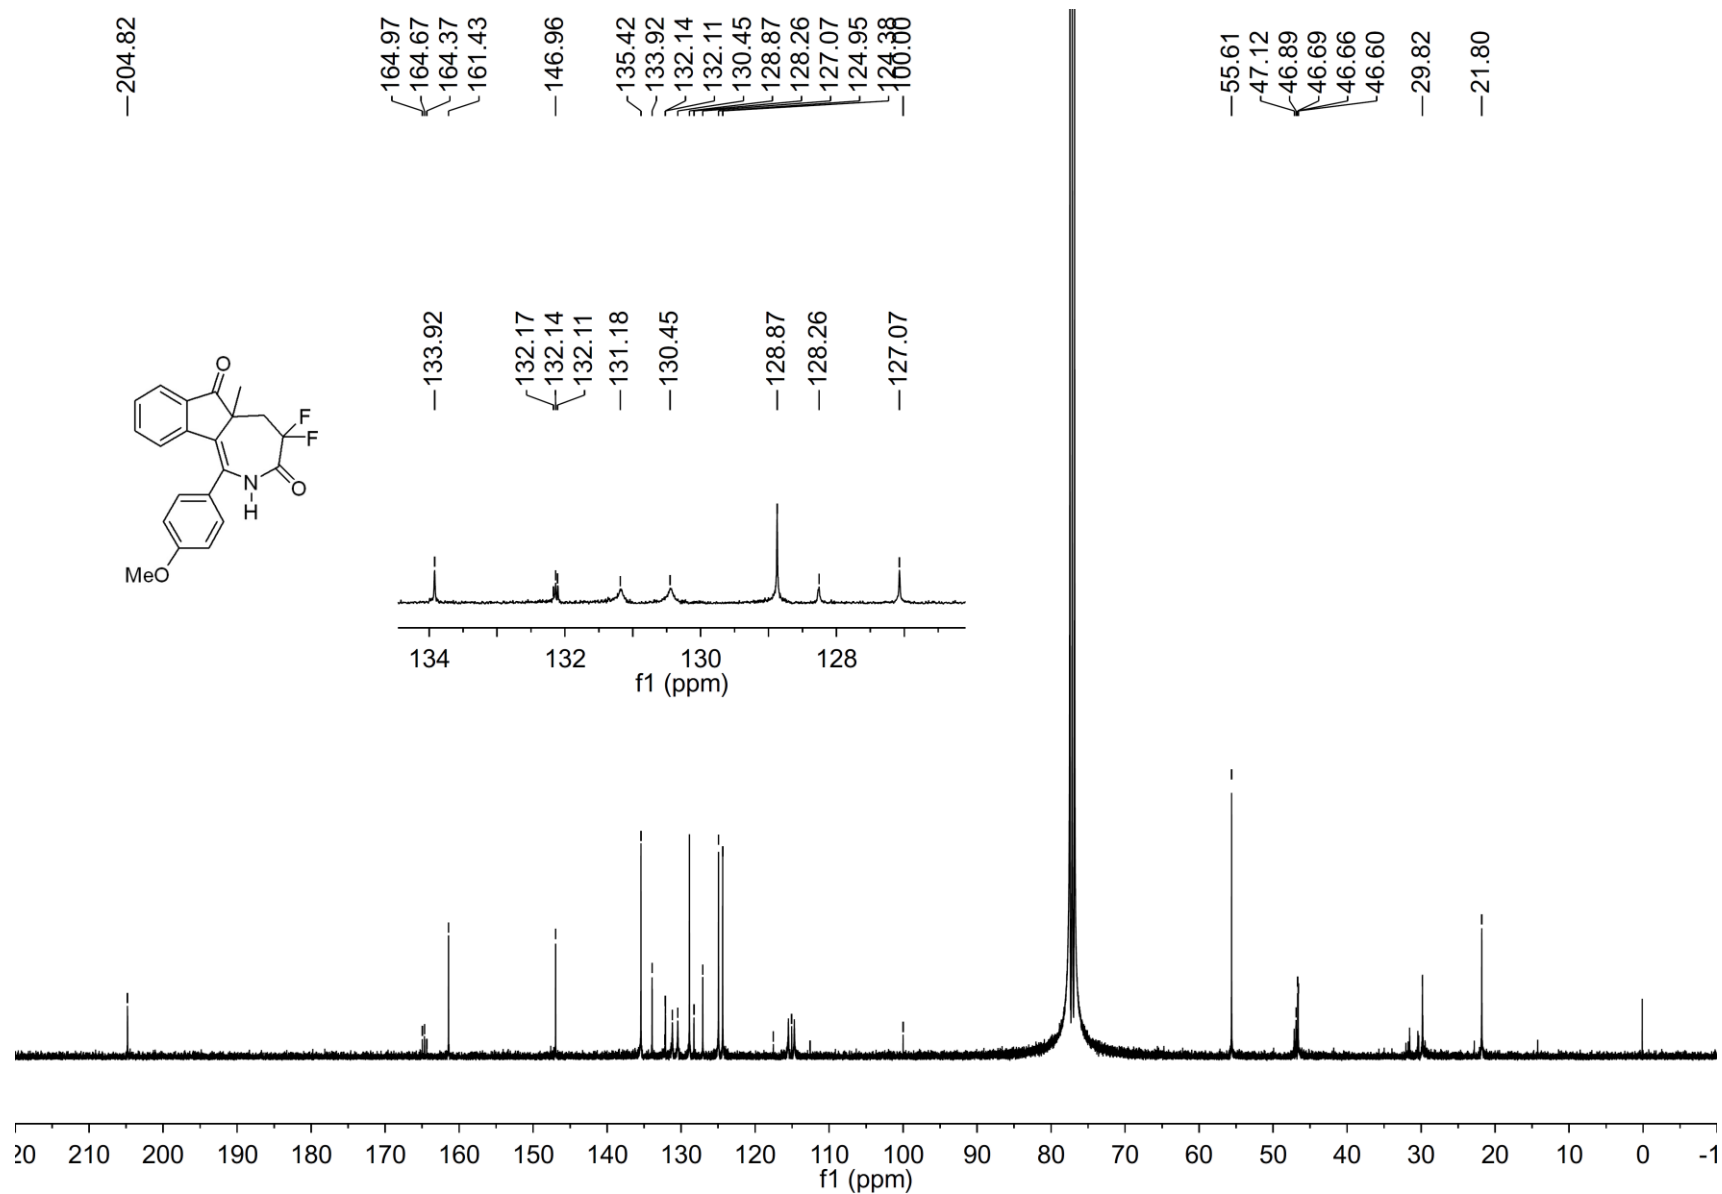

**<sup>13</sup>C NMR Spectrum of Compound 3d**

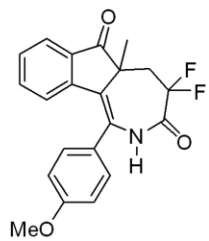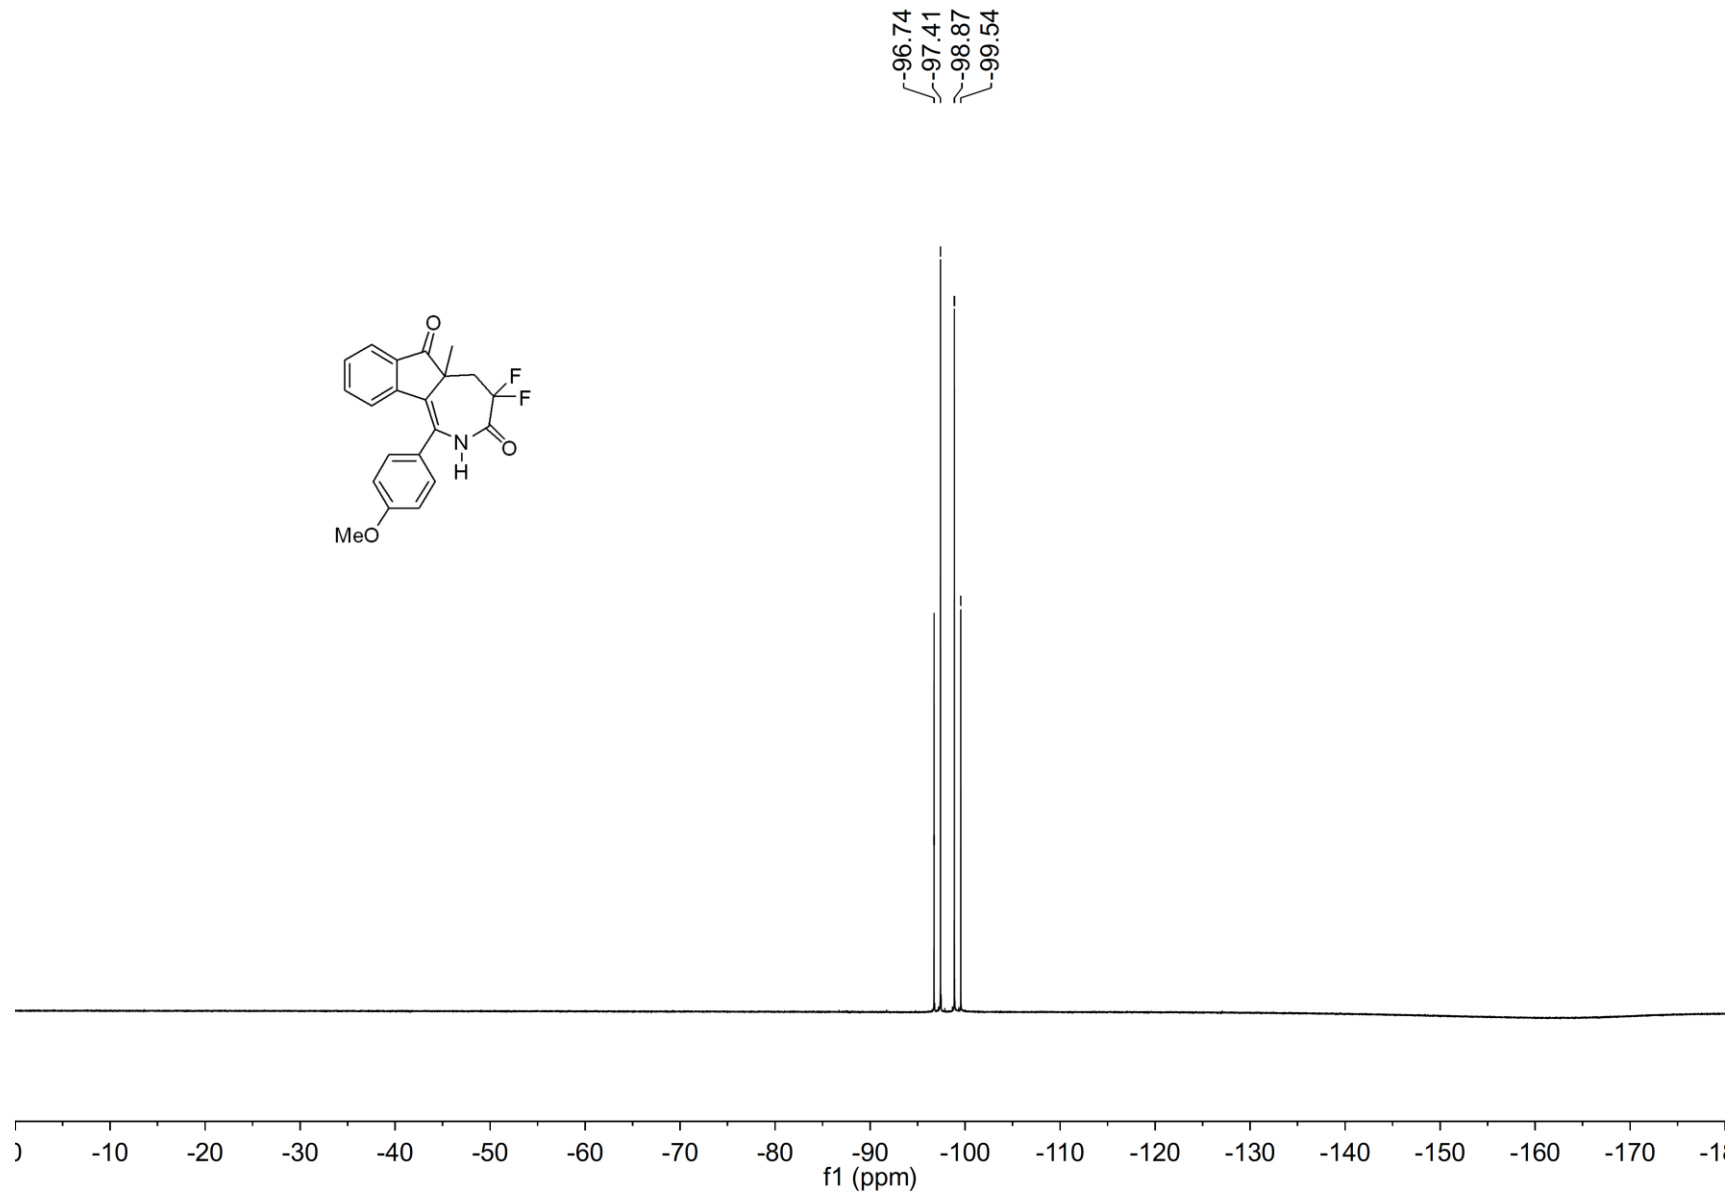

$^{19}\text{F}$  NMR Spectrum of Compound 3d



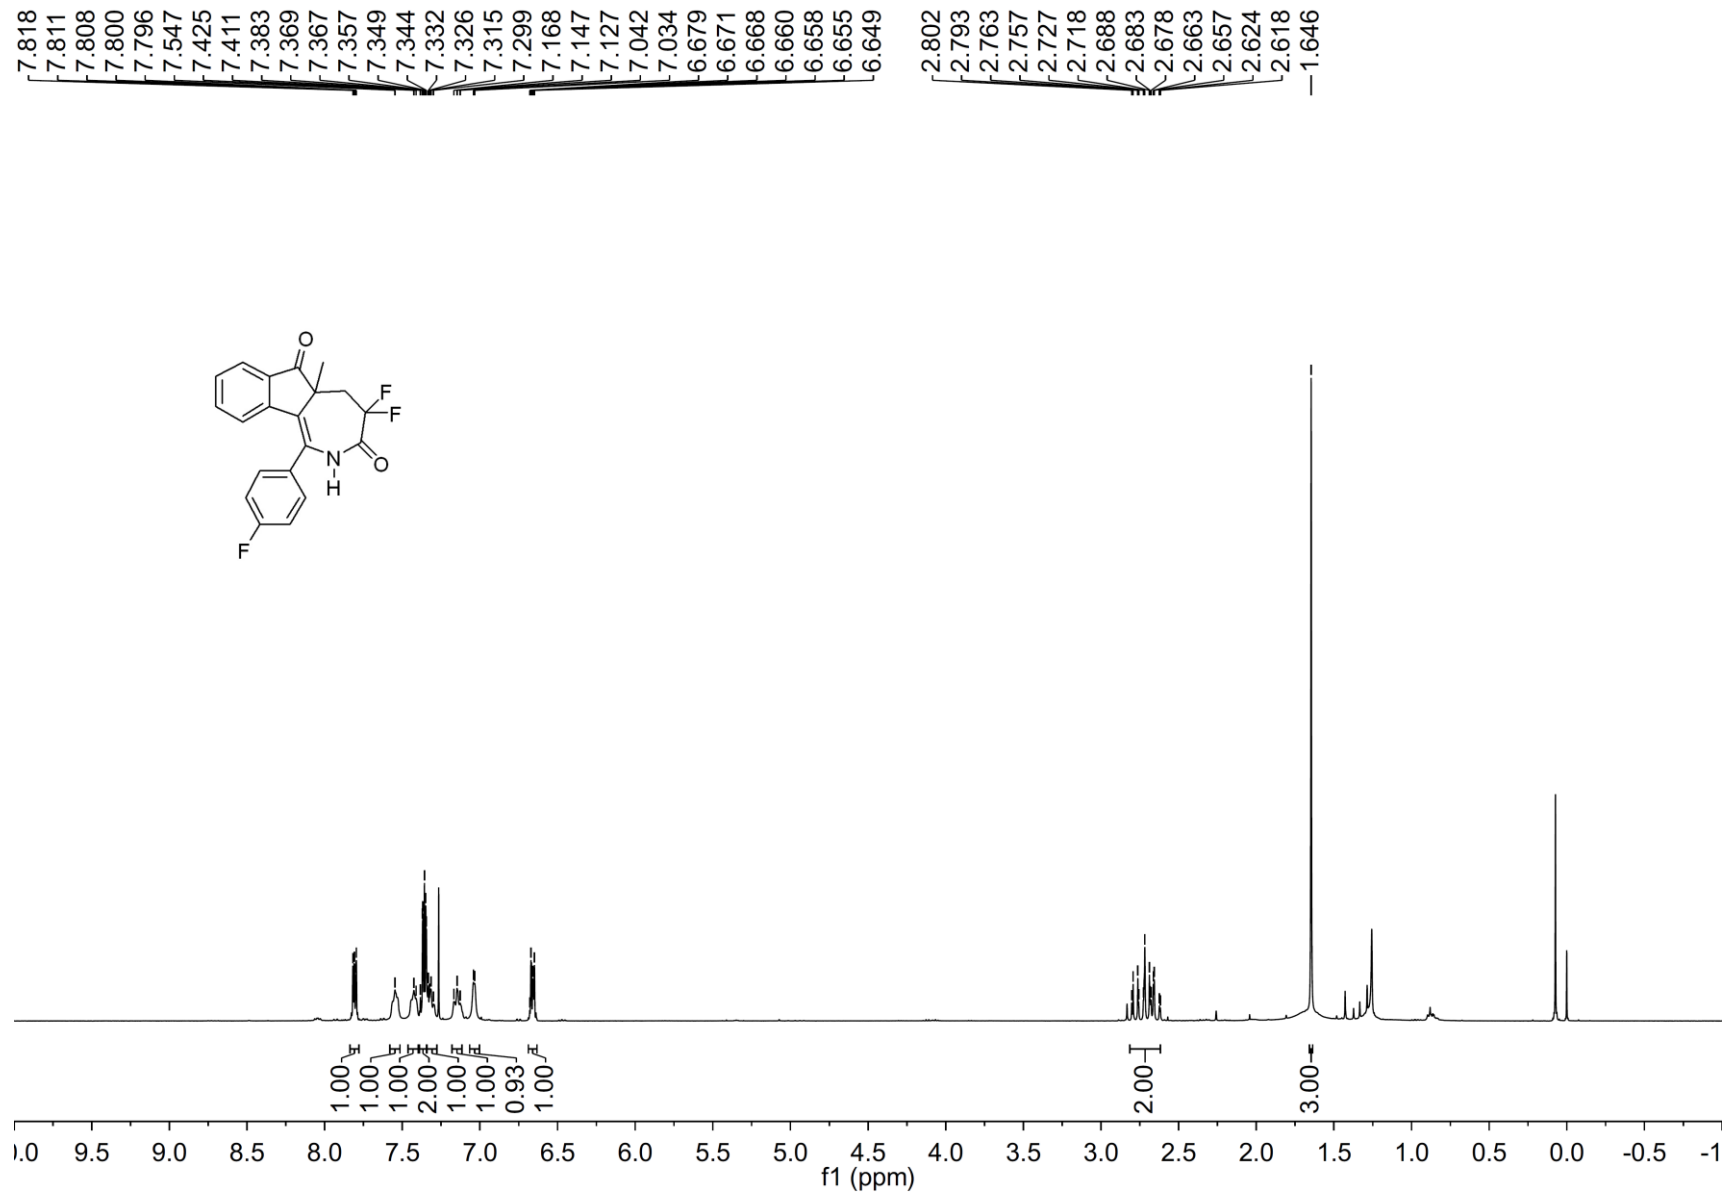

<sup>1</sup>H NMR Spectrum of Compound 3e

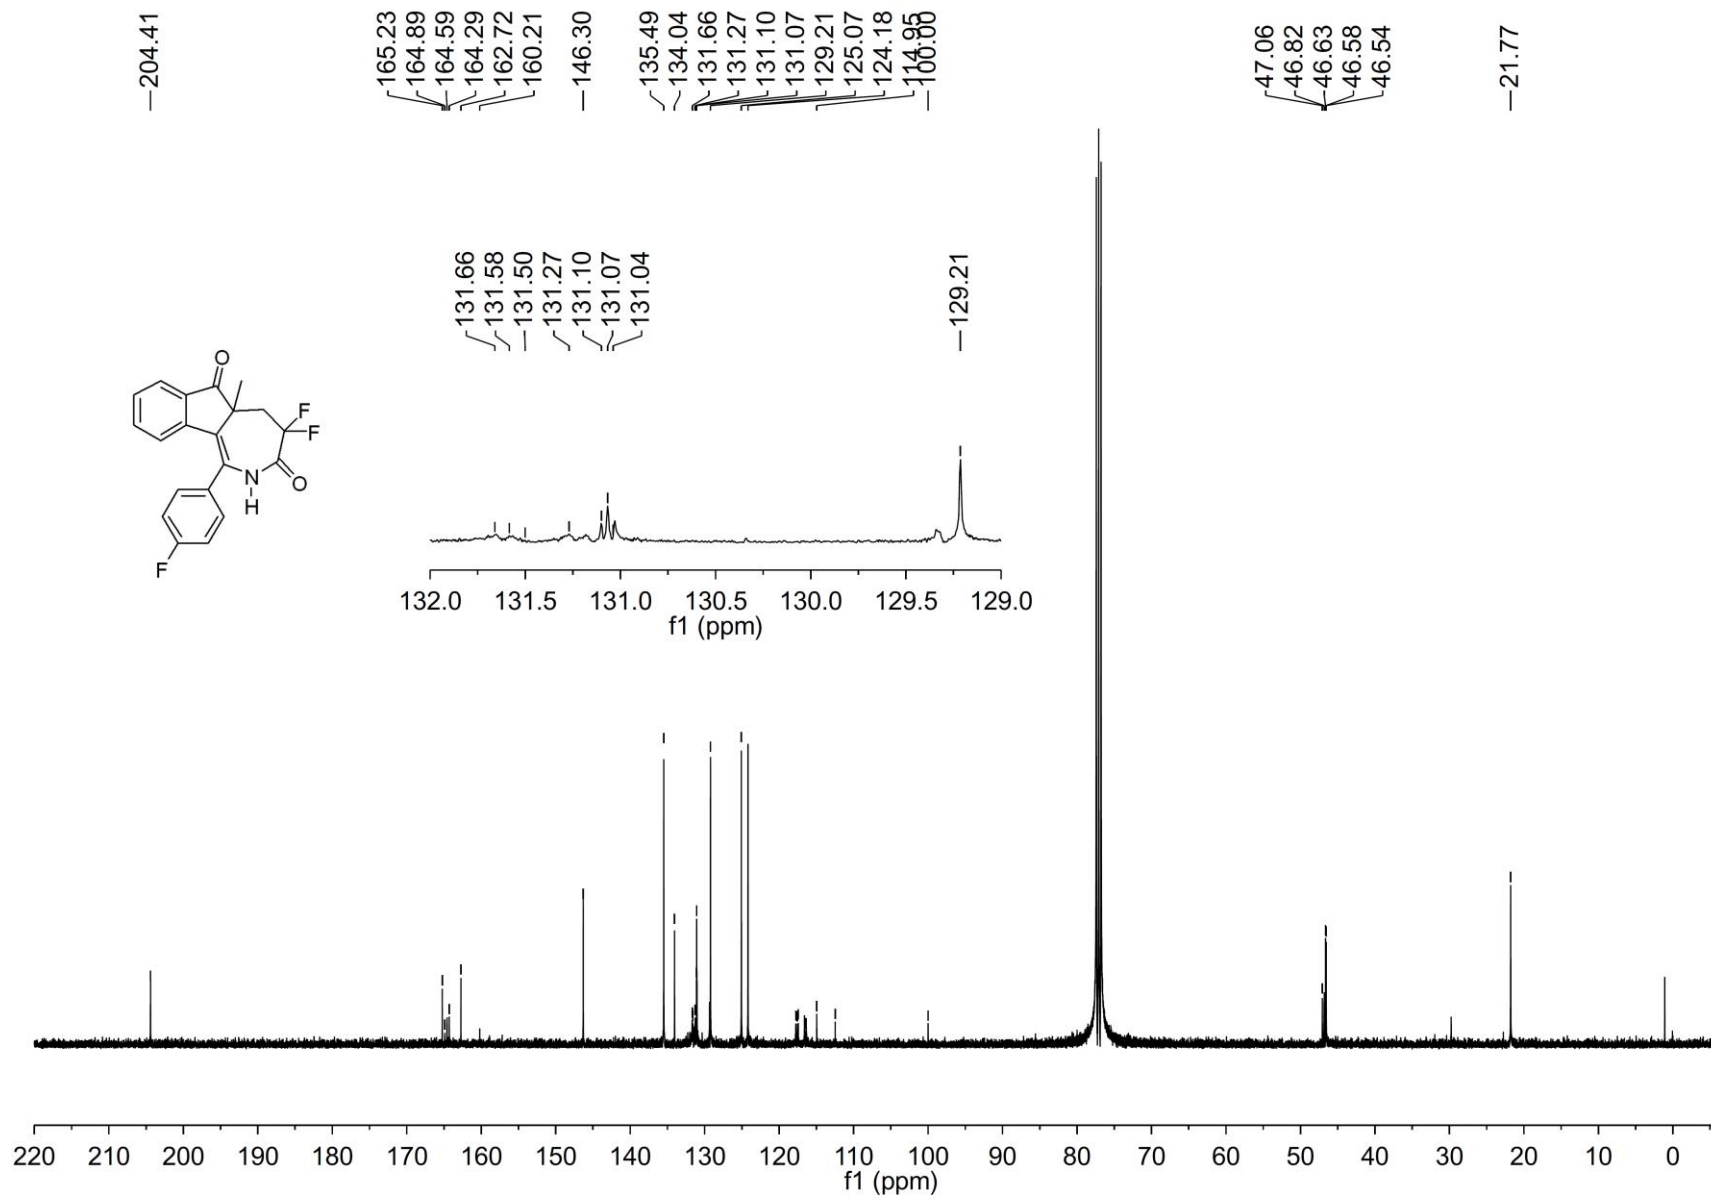

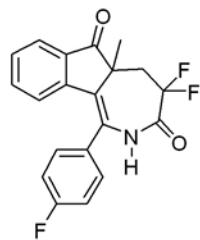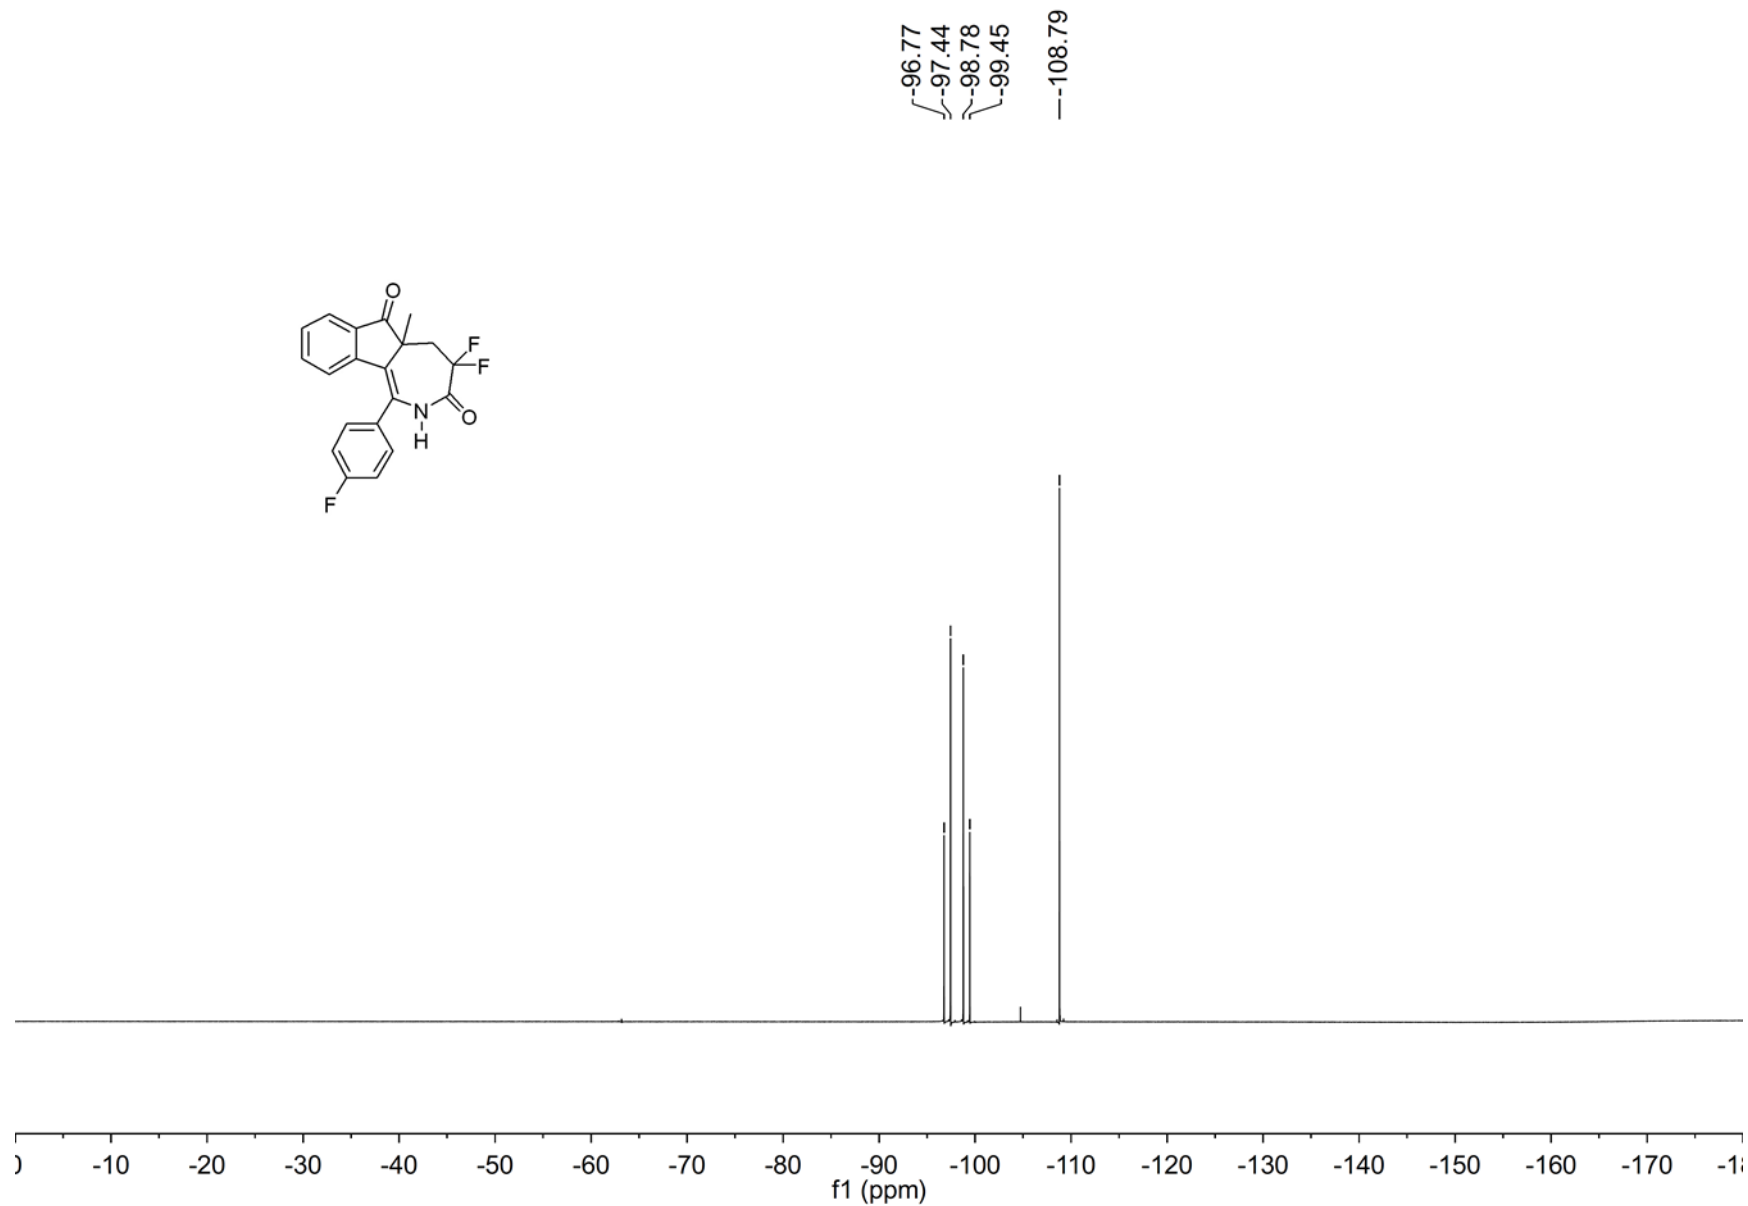

$^{19}\text{F}$  NMR Spectrum of Compound 3e

7.822  
7.813  
7.805  
7.799  
7.617  
7.597  
7.508  
7.488  
7.443  
7.424  
7.395  
7.383  
7.376  
7.370  
7.361  
6.944  
6.723  
6.718  
6.709  
6.701

2.804  
2.795  
2.765  
2.759  
2.729  
2.720  
2.690  
2.683  
2.678  
2.663  
2.657  
2.630  
2.624  
2.618  
1.647

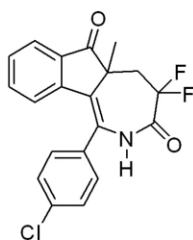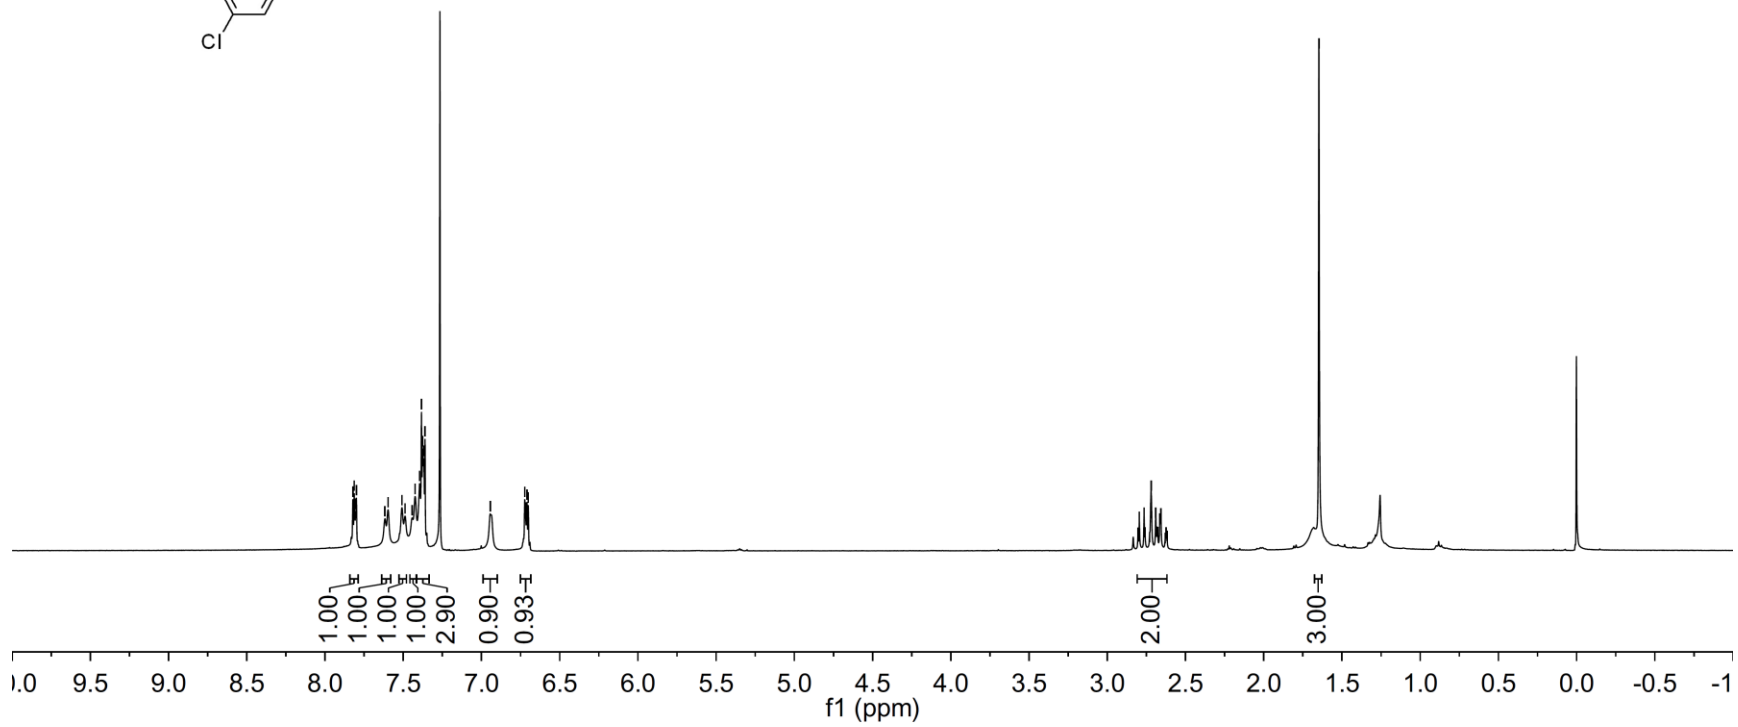

**<sup>1</sup>H NMR Spectrum of Compound 3f**

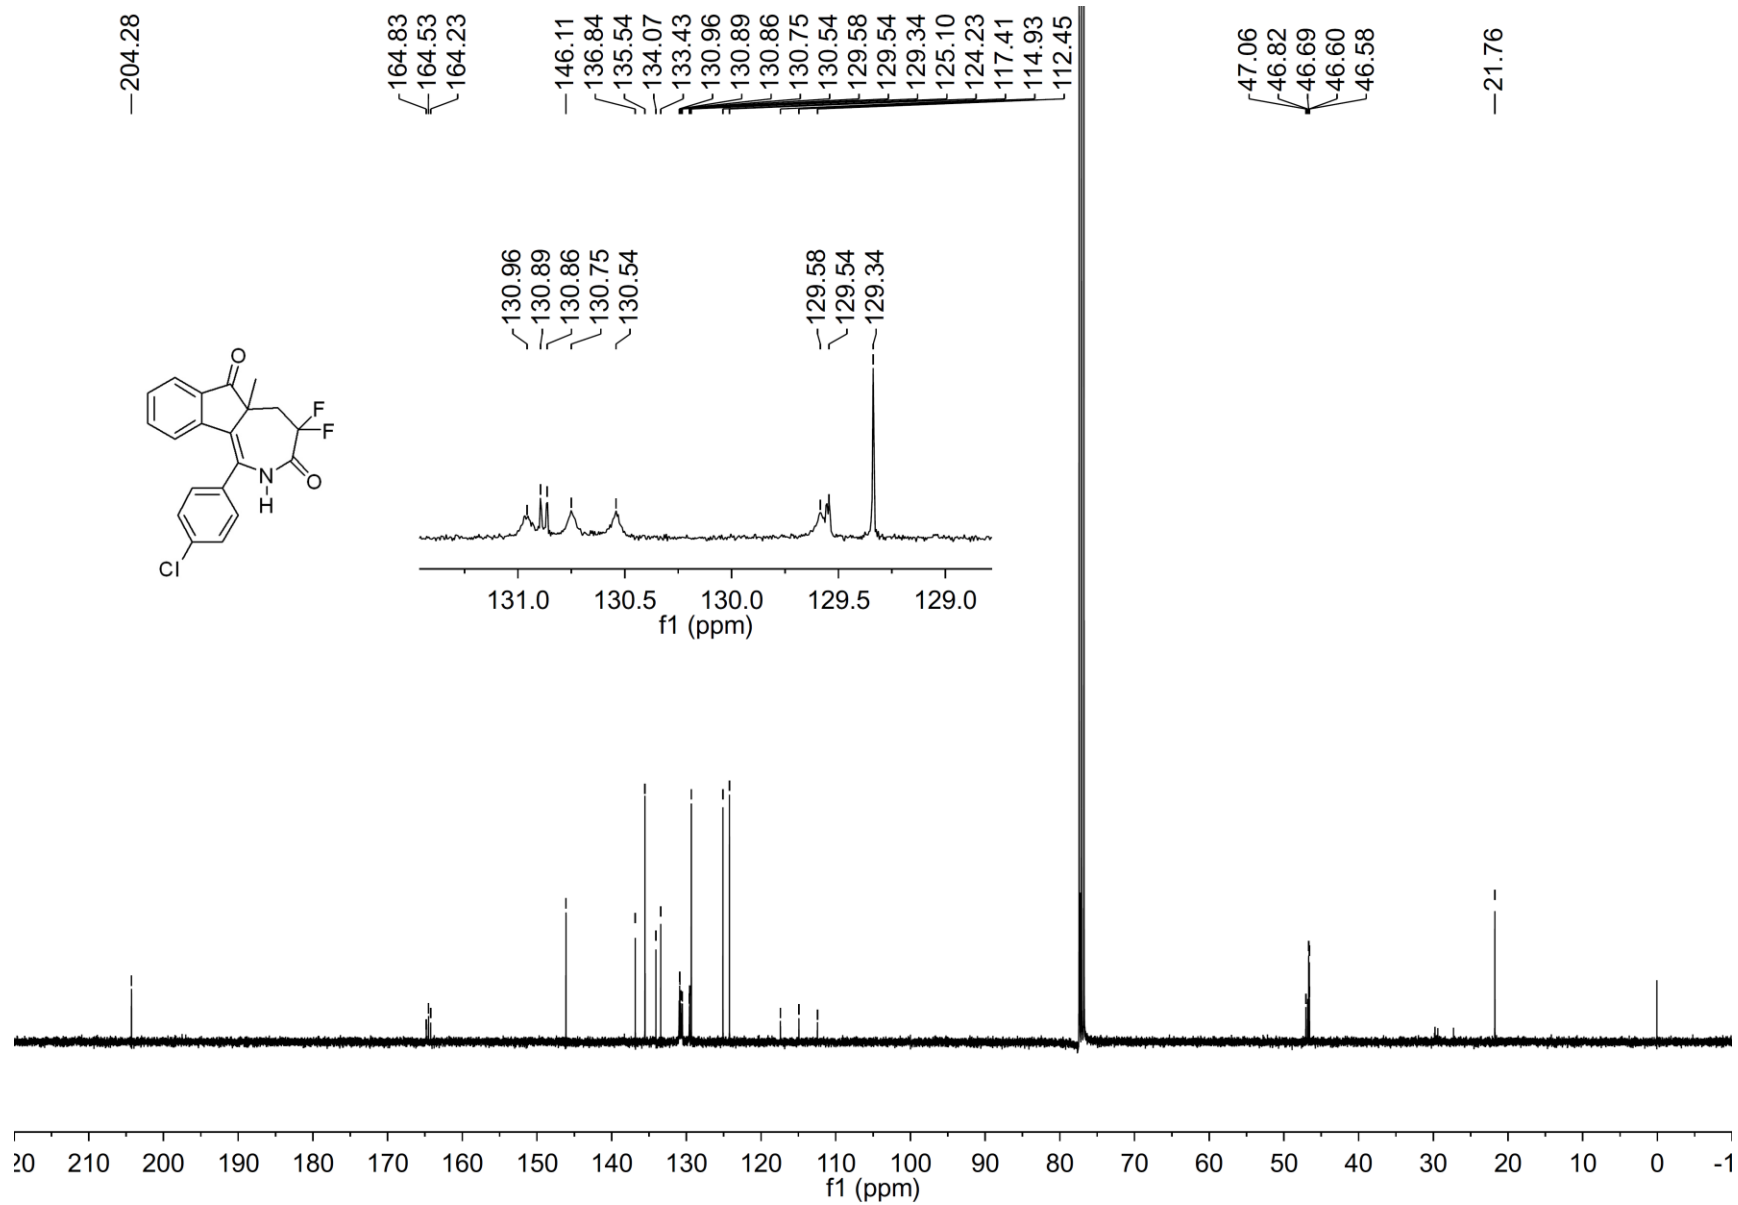

<sup>13</sup>C NMR Spectrum of Compound 3f

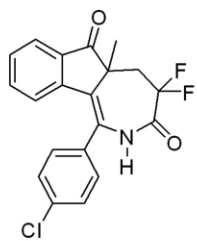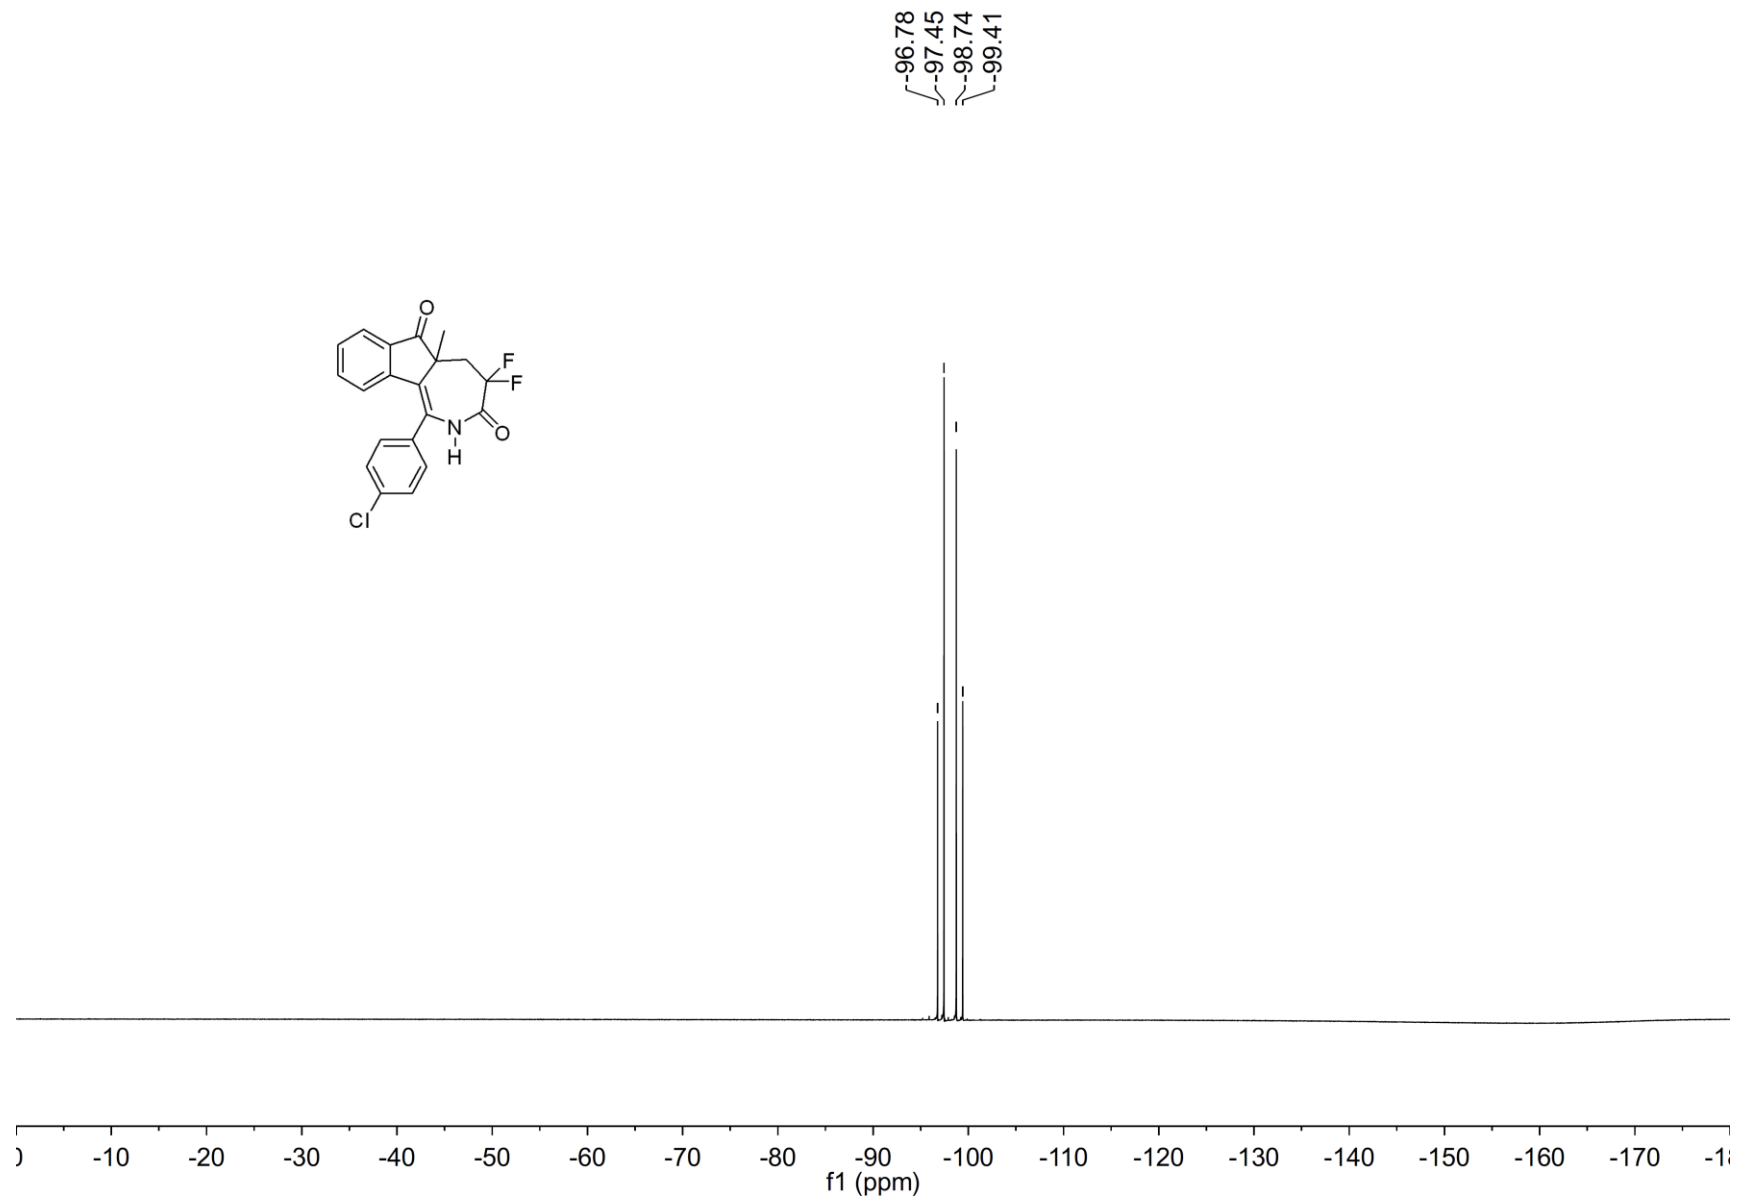

$^{19}\text{F}$  NMR Spectrum of Compound 3f

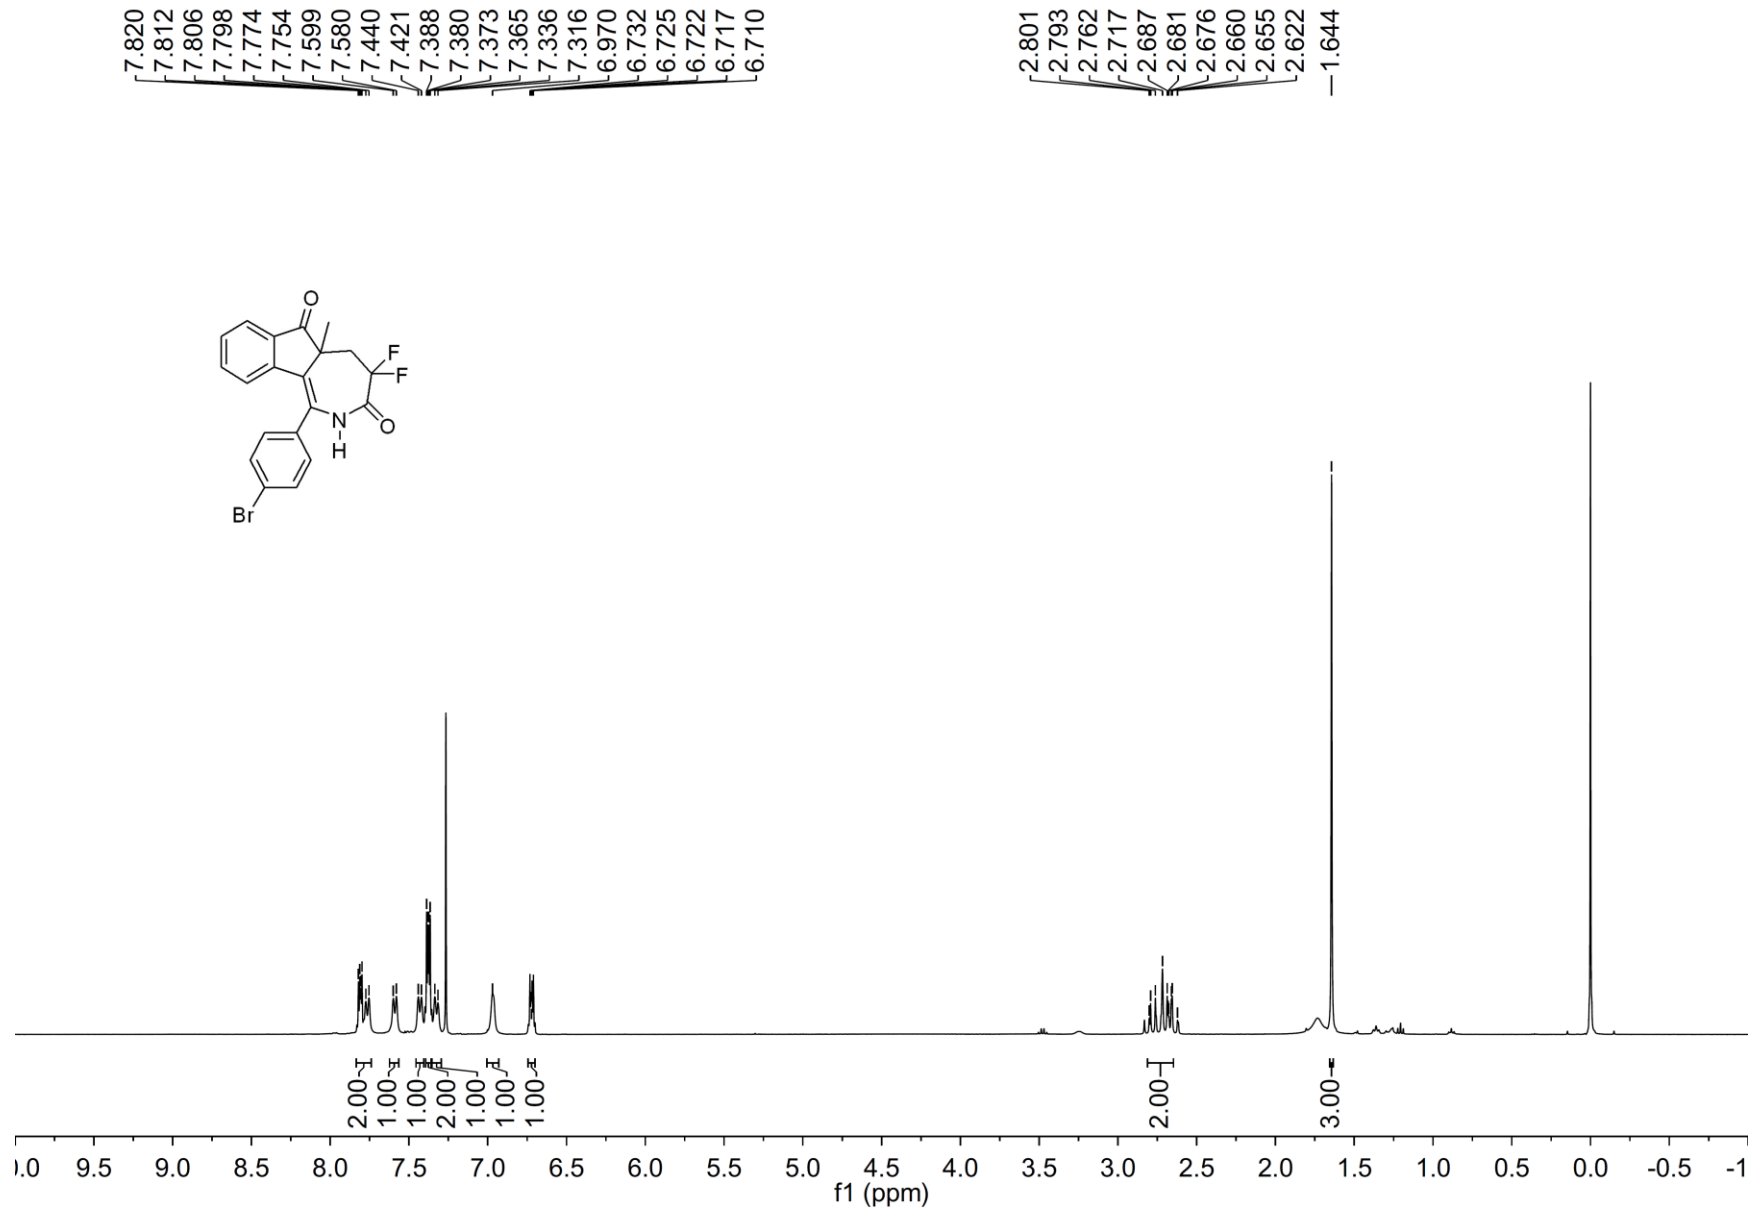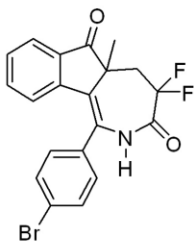

<sup>1</sup>H NMR Spectrum of Compound 3g

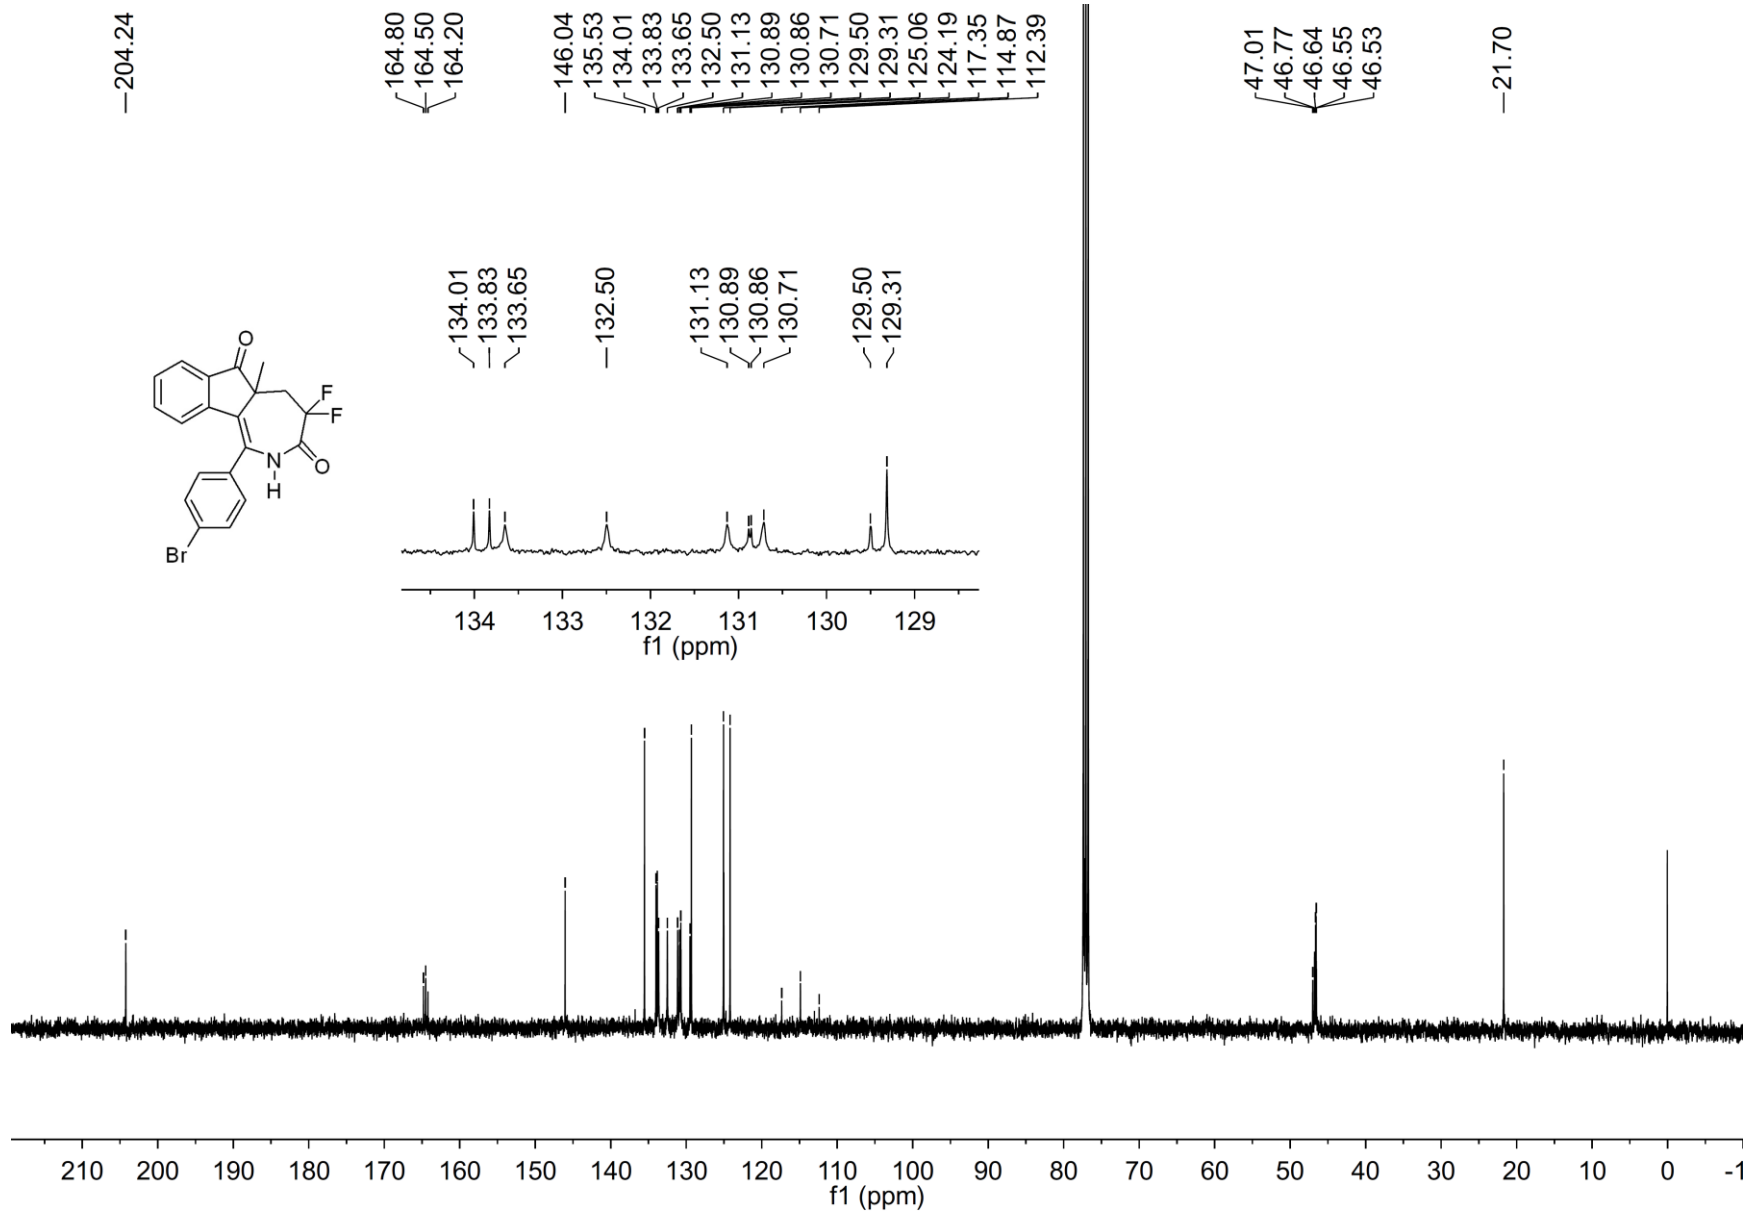



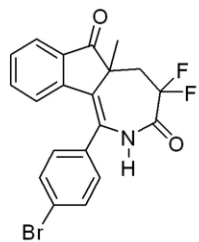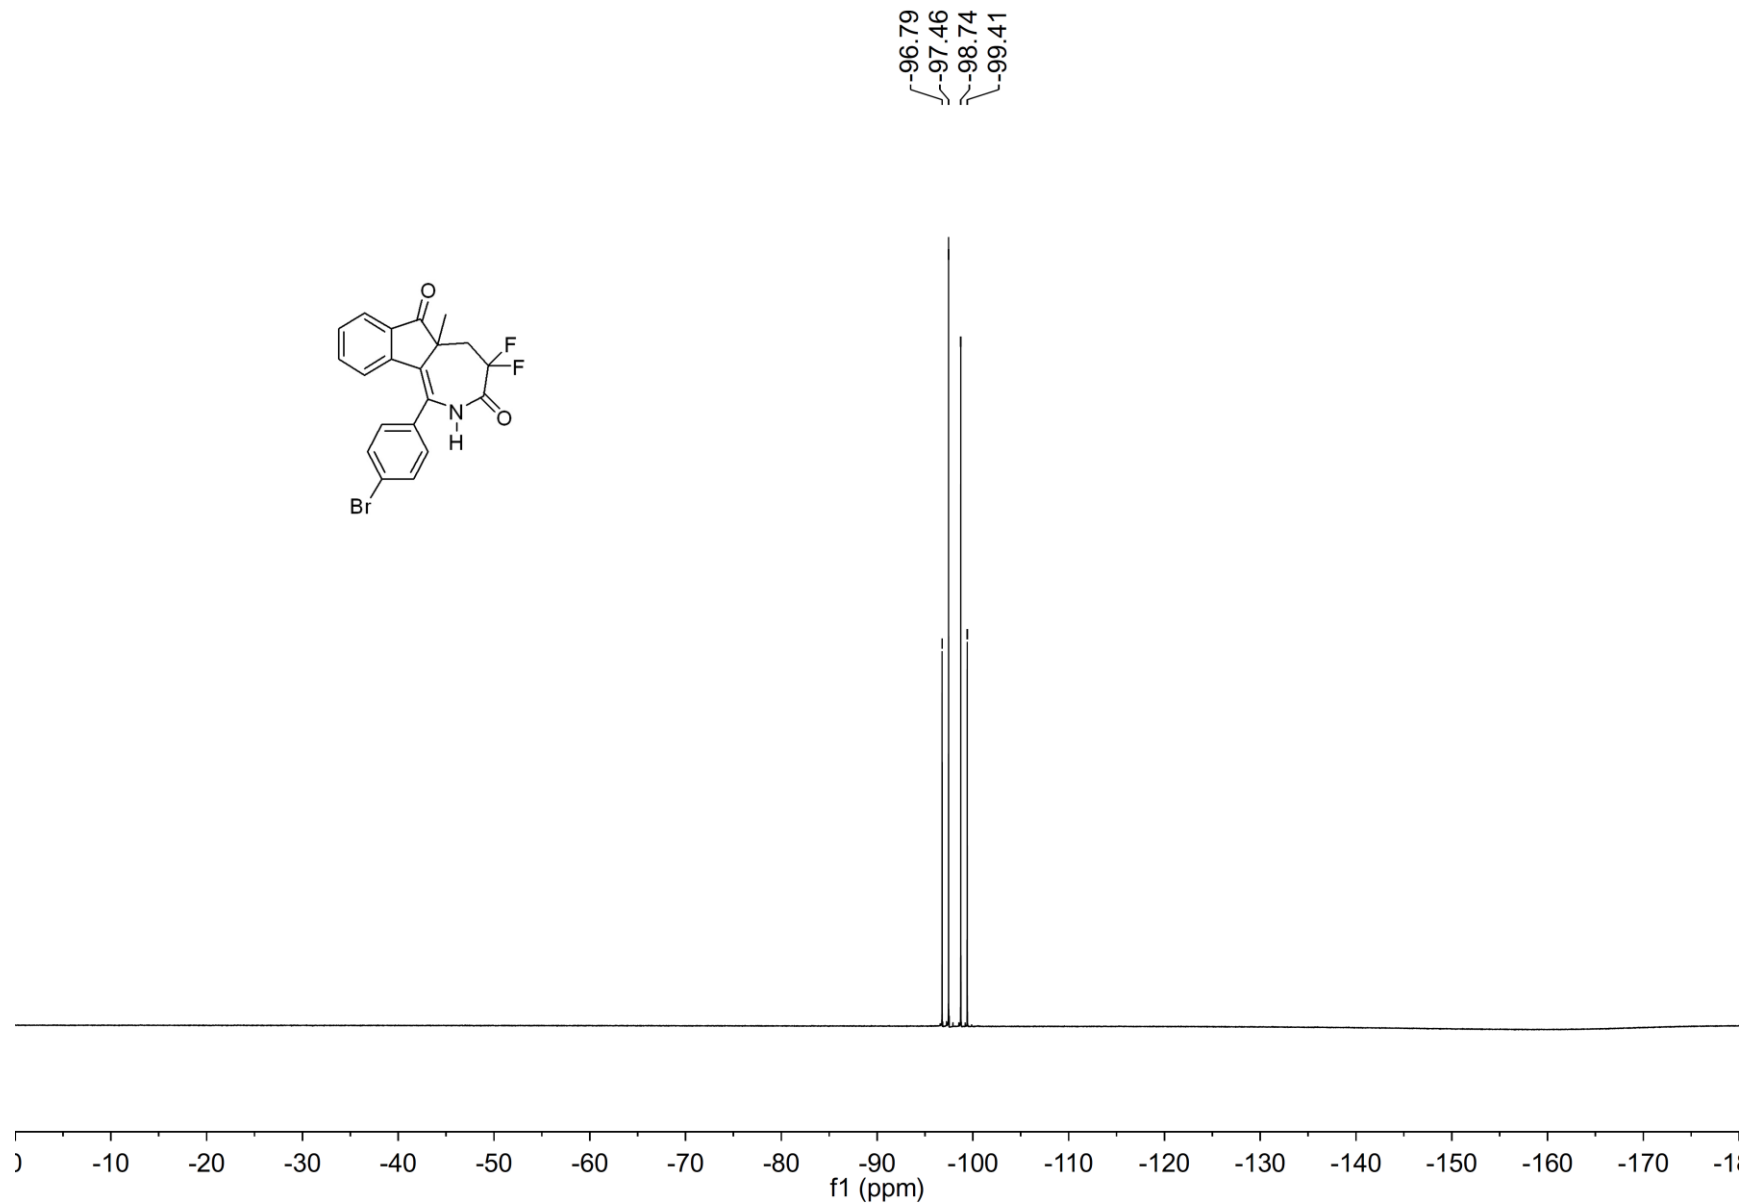

$^{19}\text{F}$  NMR Spectrum of Compound 3g

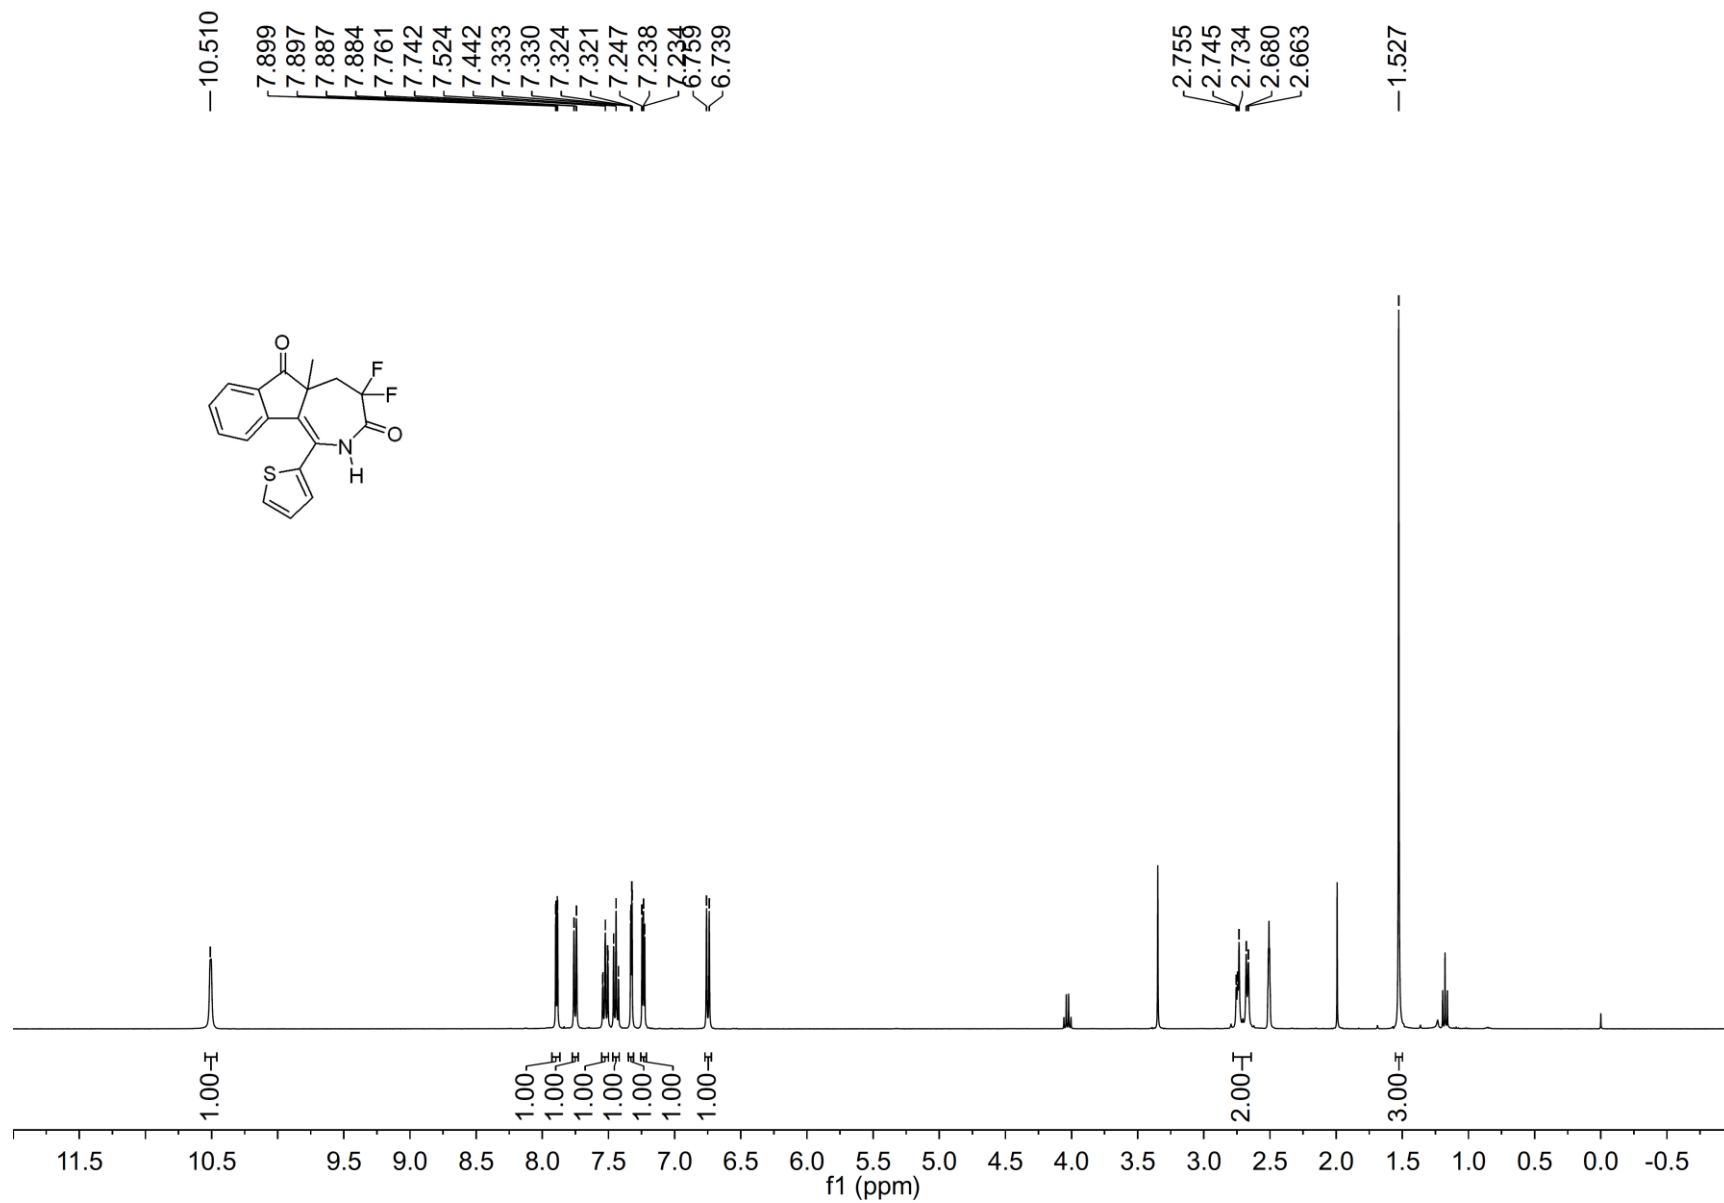

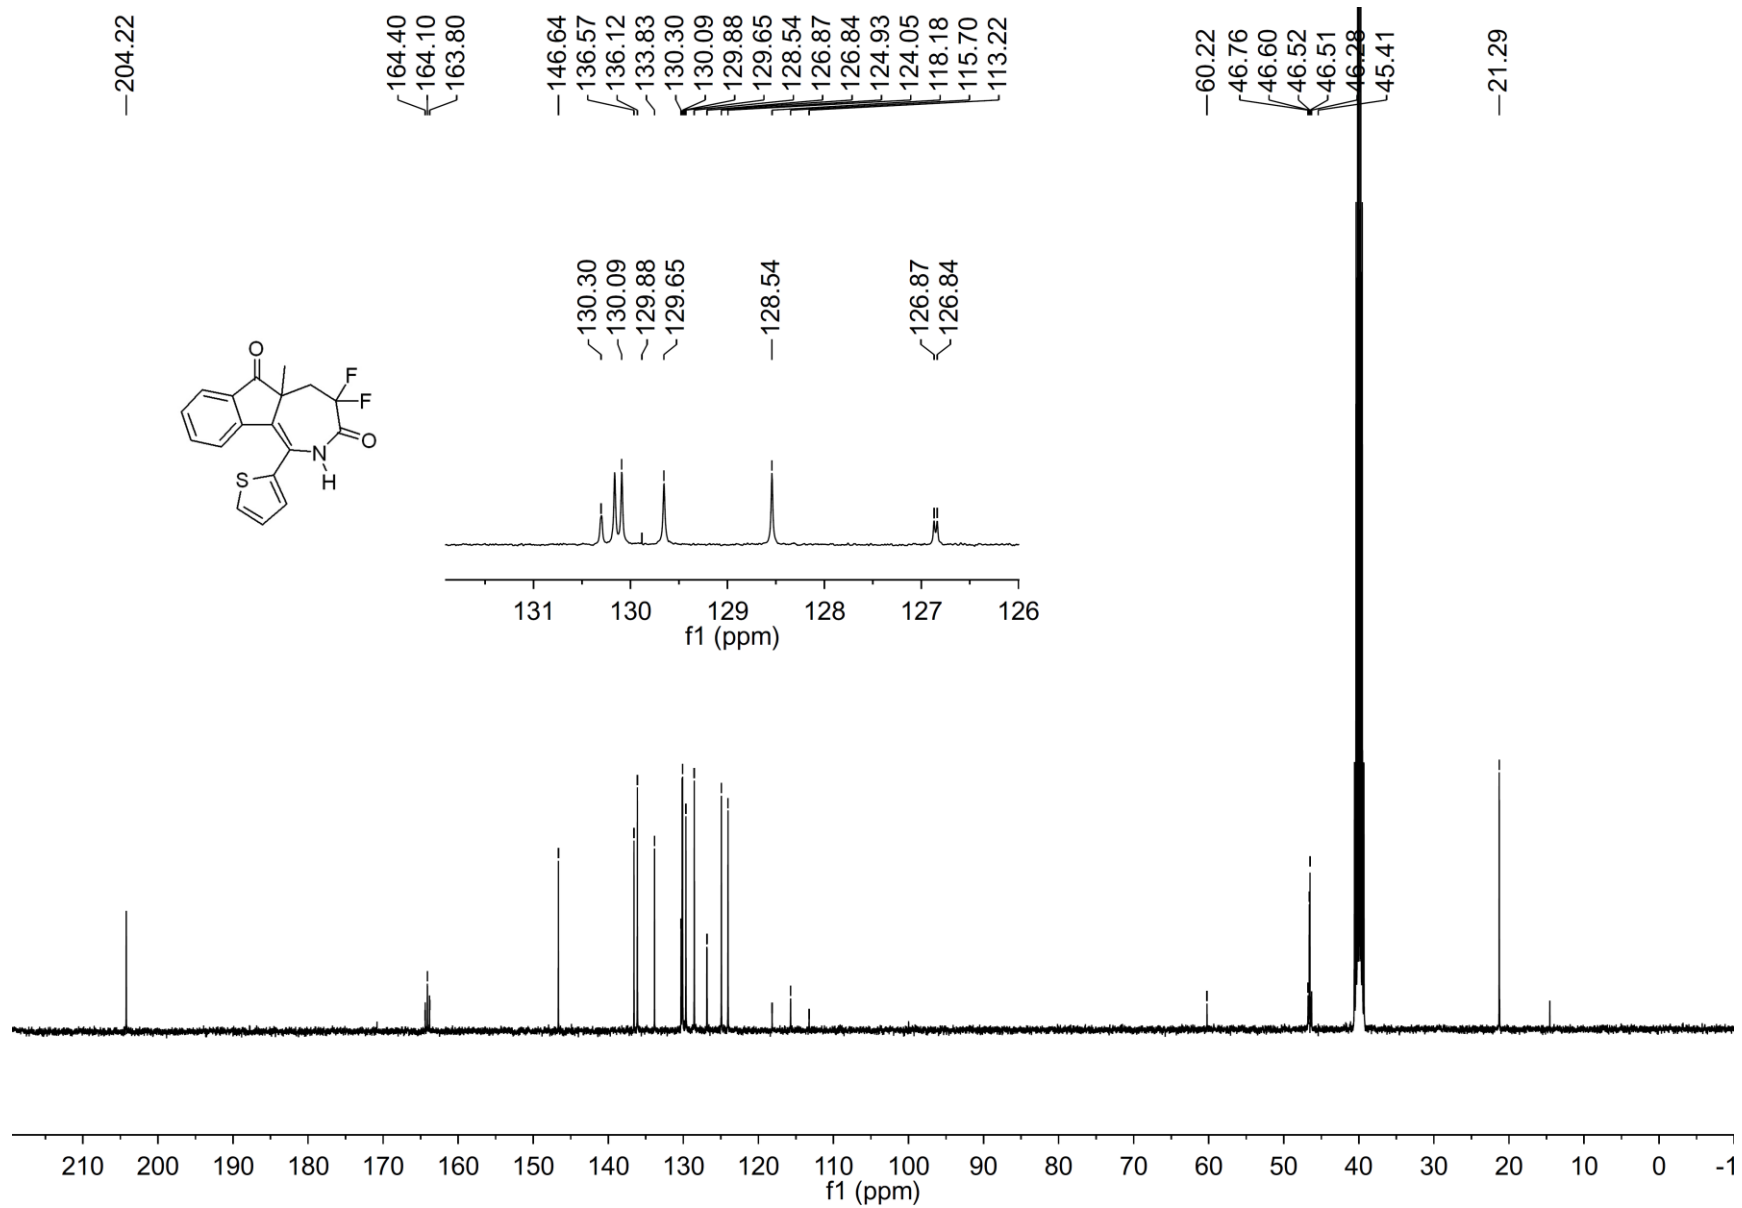

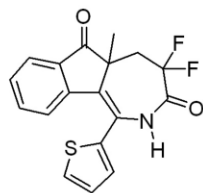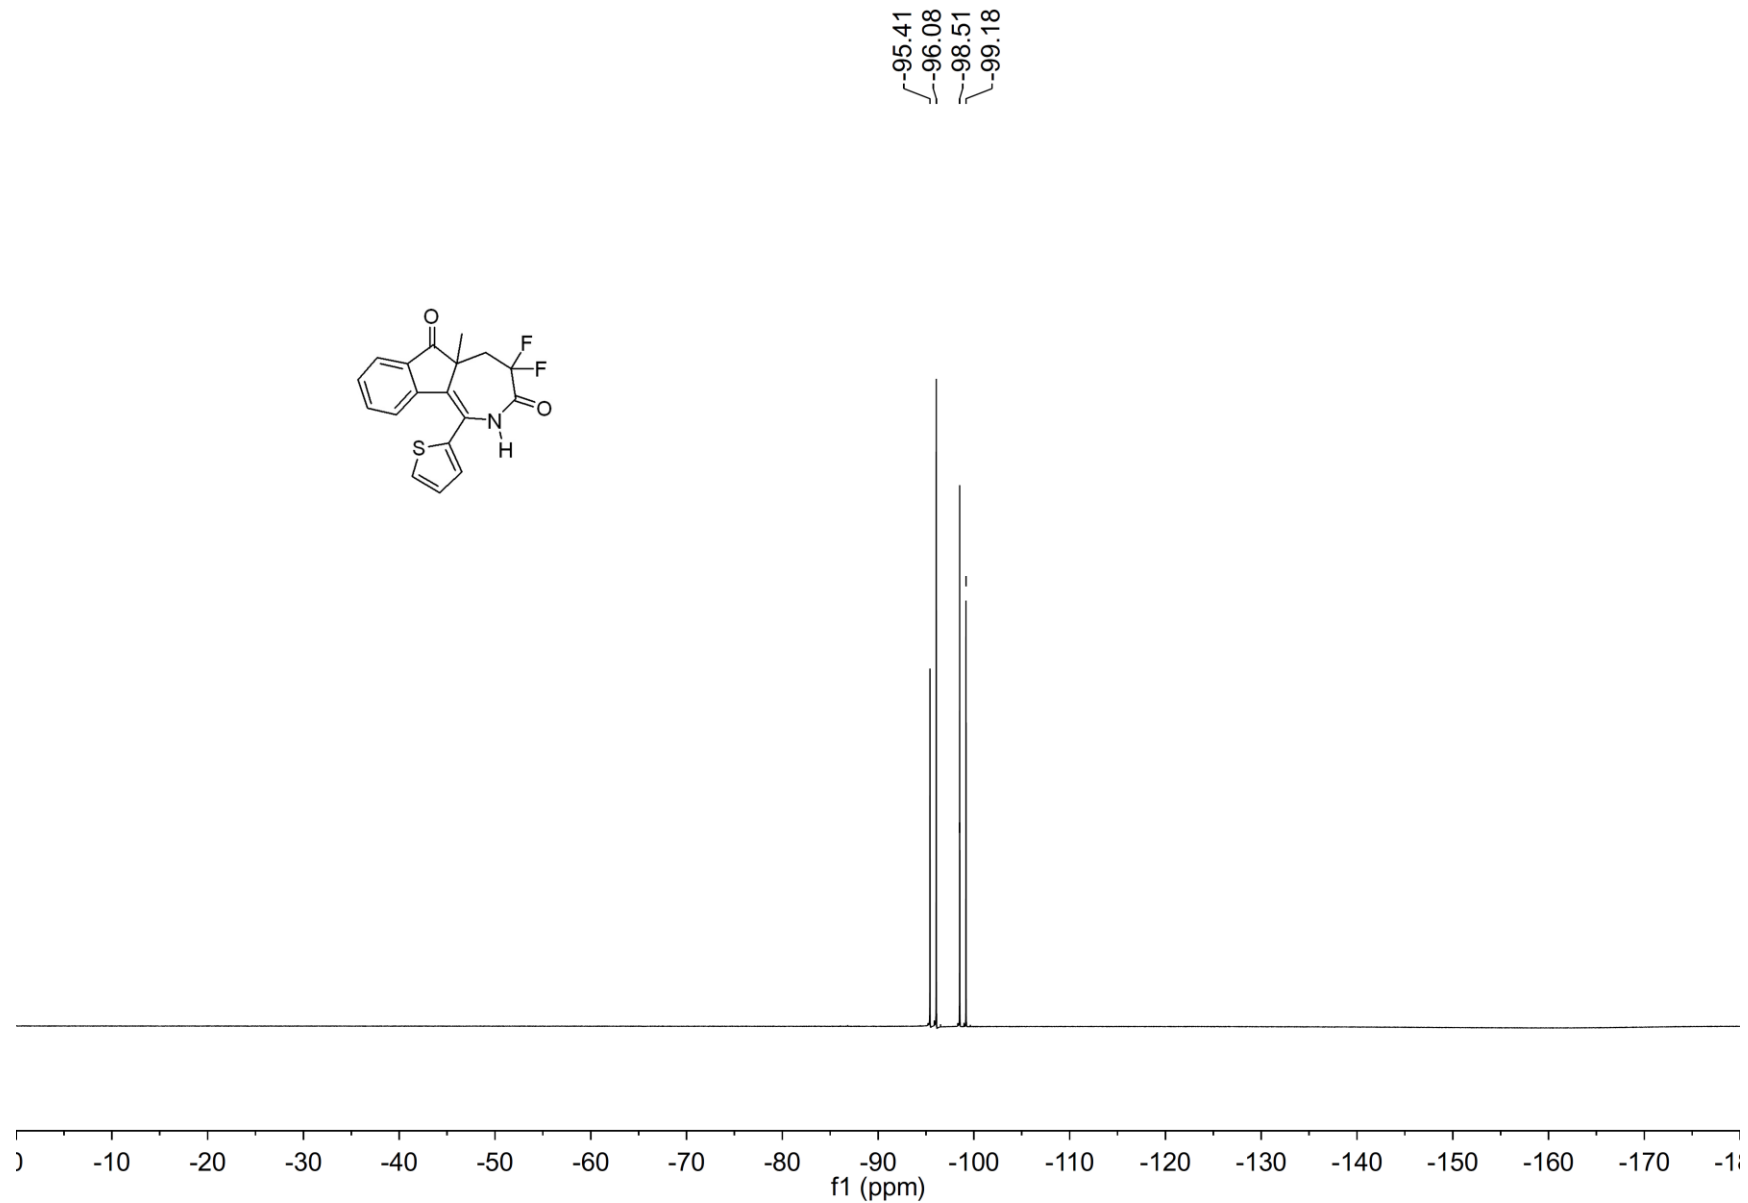

$^{19}\text{F}$  NMR Spectrum of Compound 3h

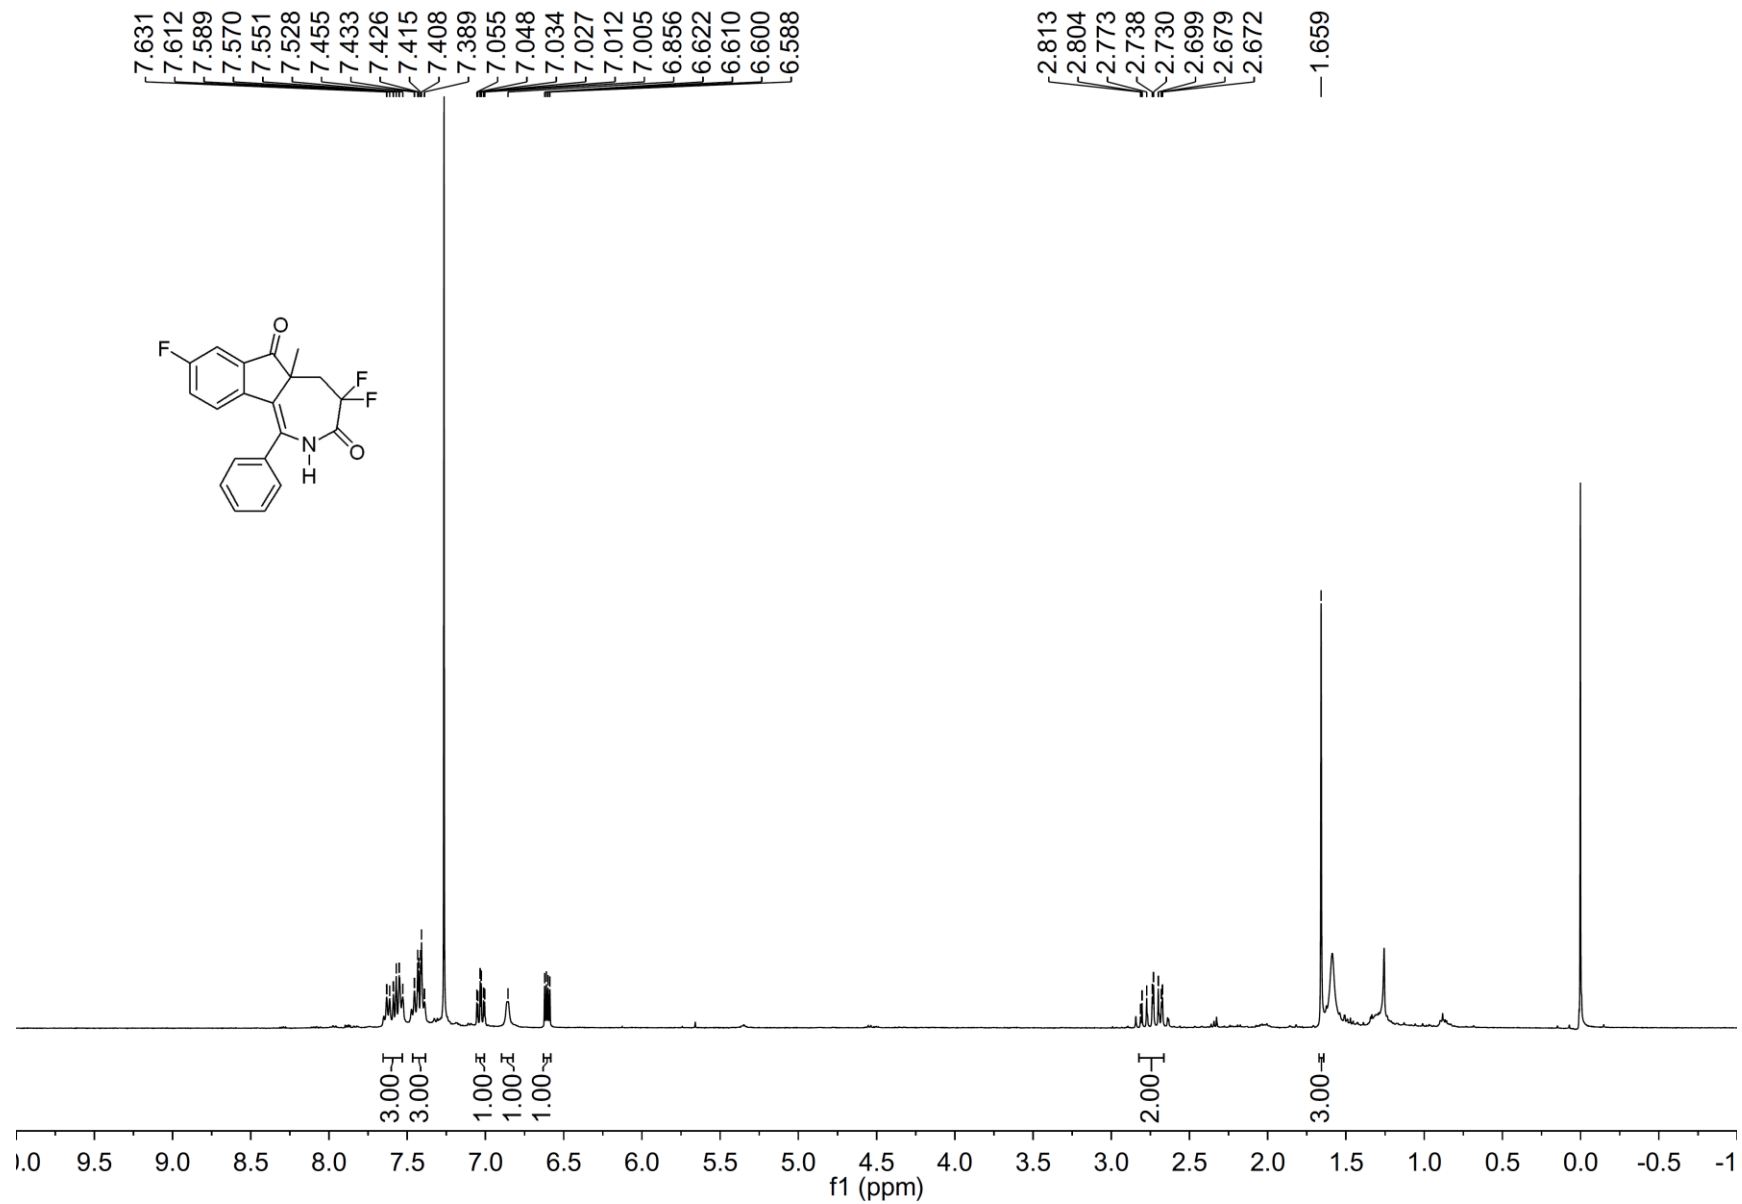

<sup>1</sup>H NMR Spectrum of Compound 3i

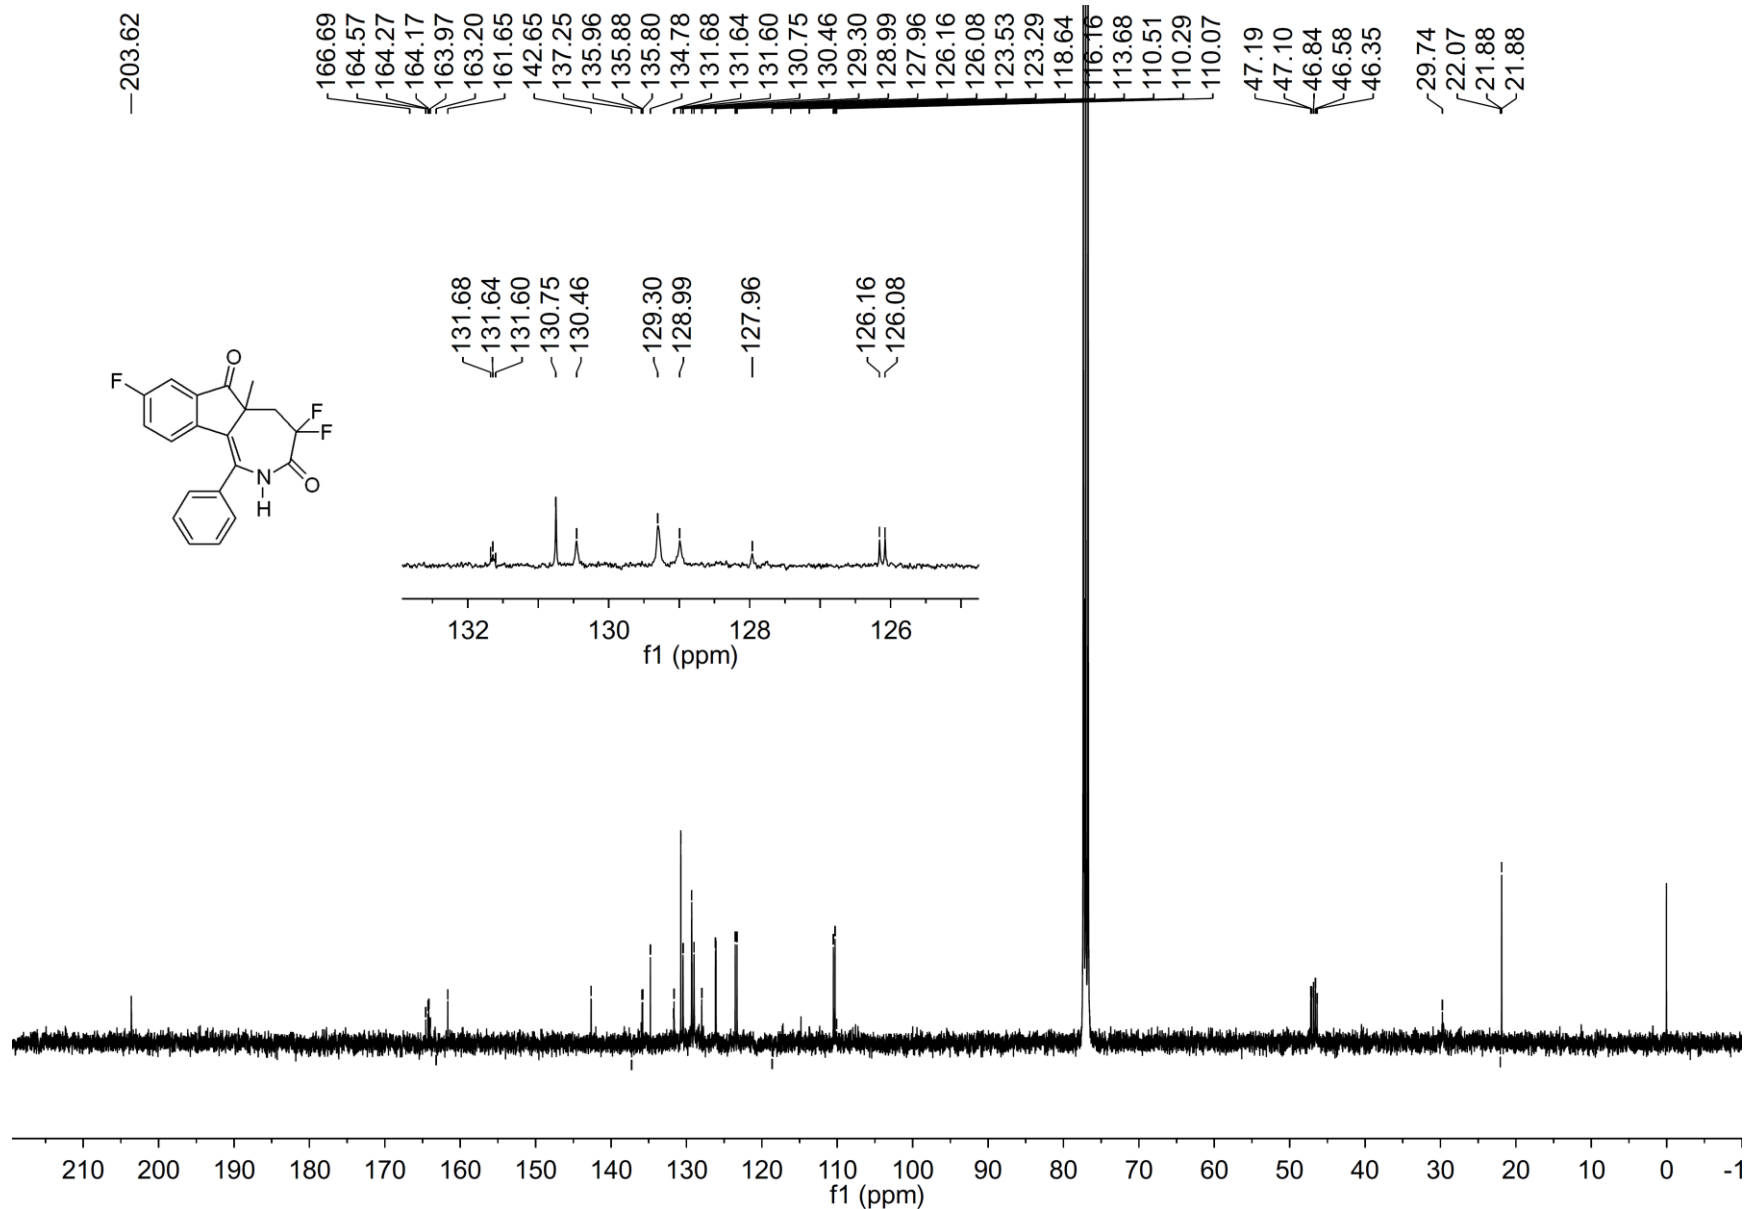

<sup>13</sup>C NMR Spectrum of Compound 3i

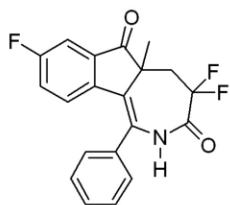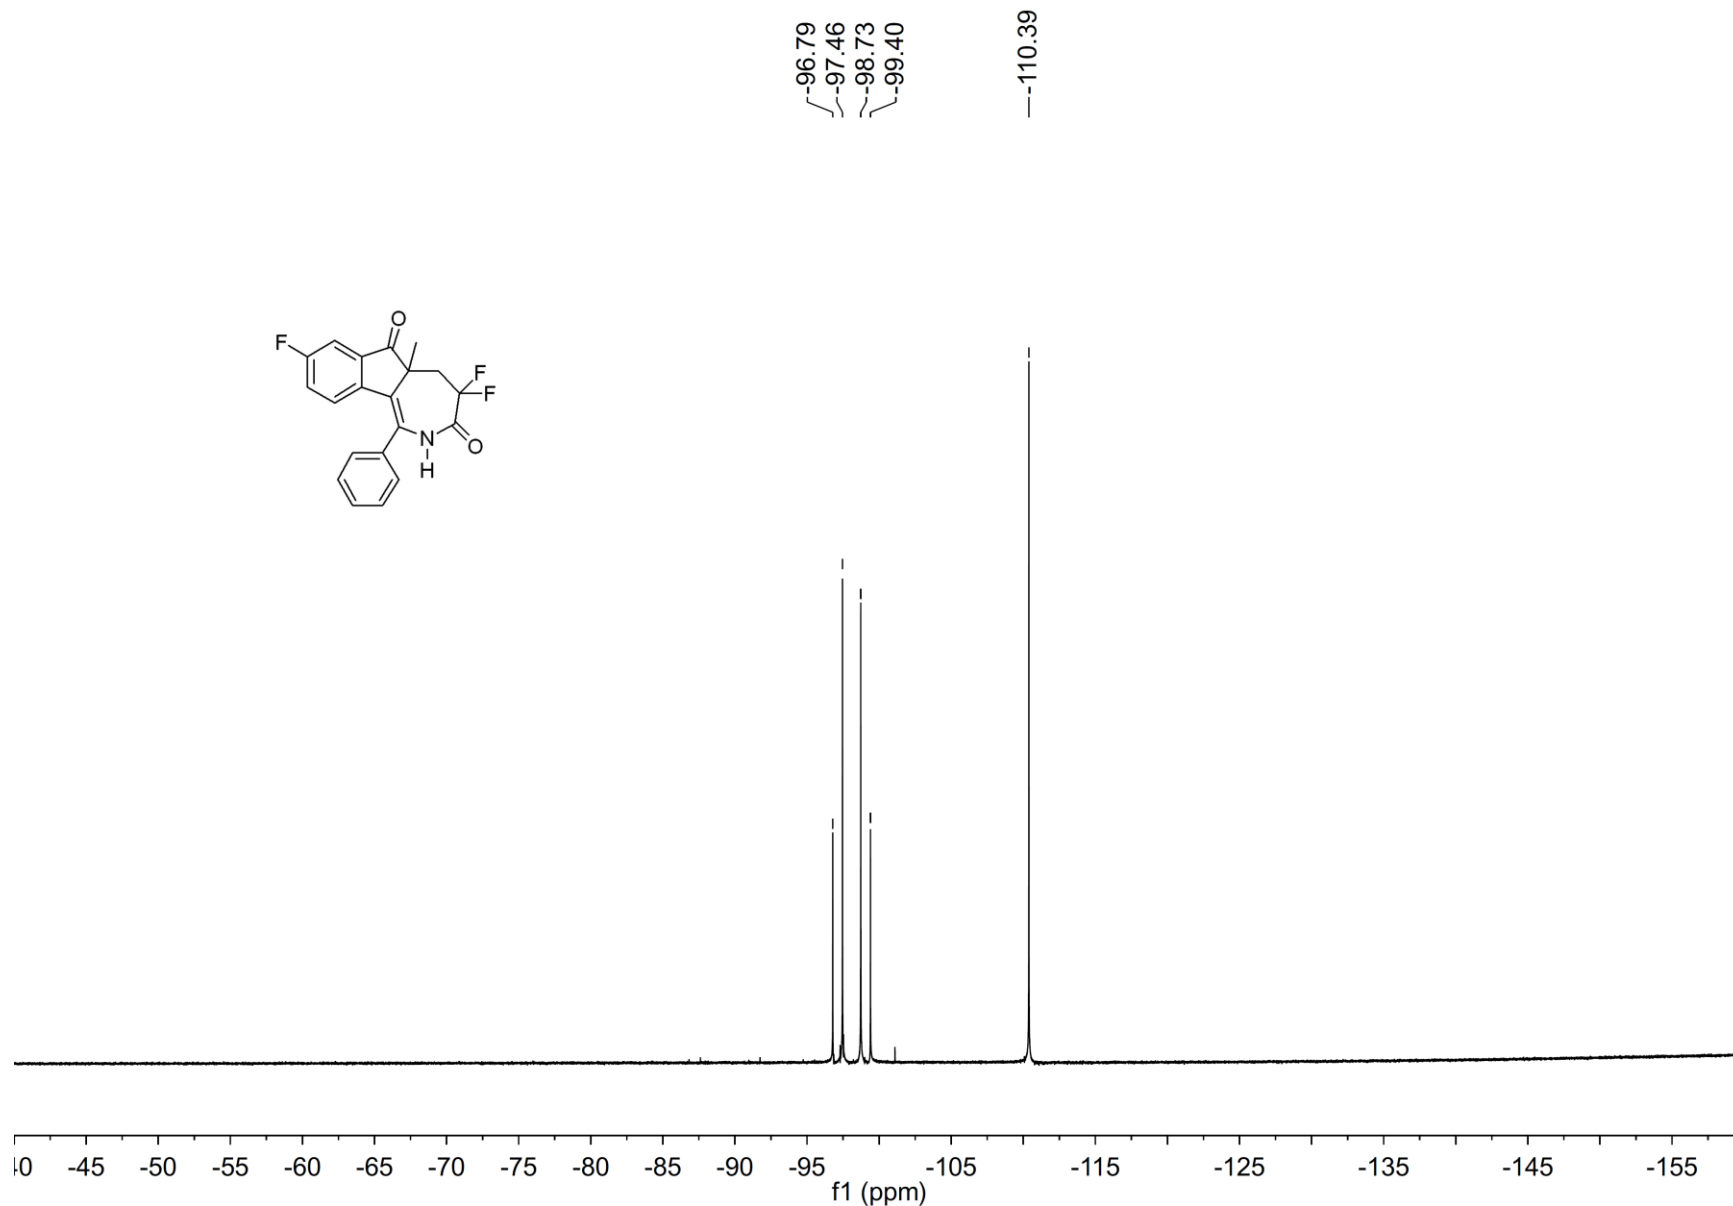

<sup>19</sup>F NMR Spectrum of Compound 3i

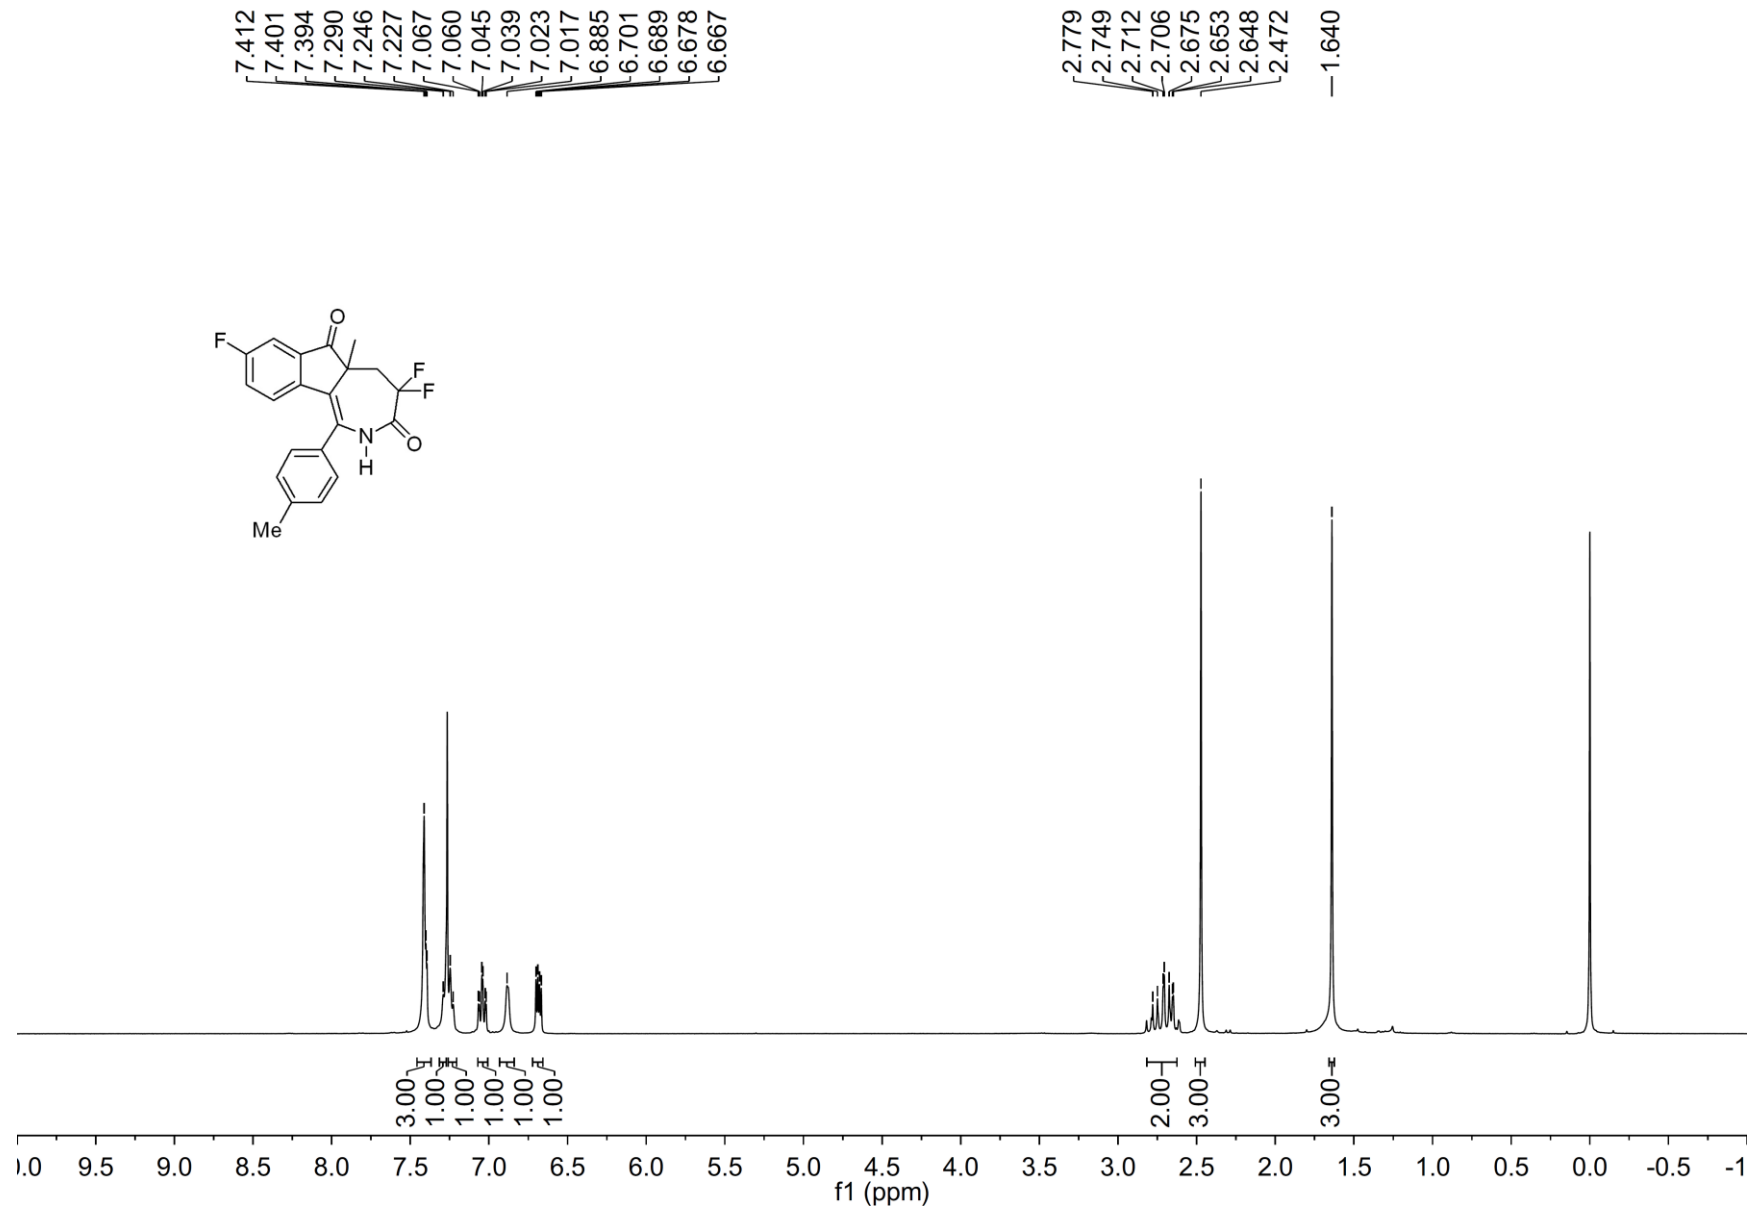



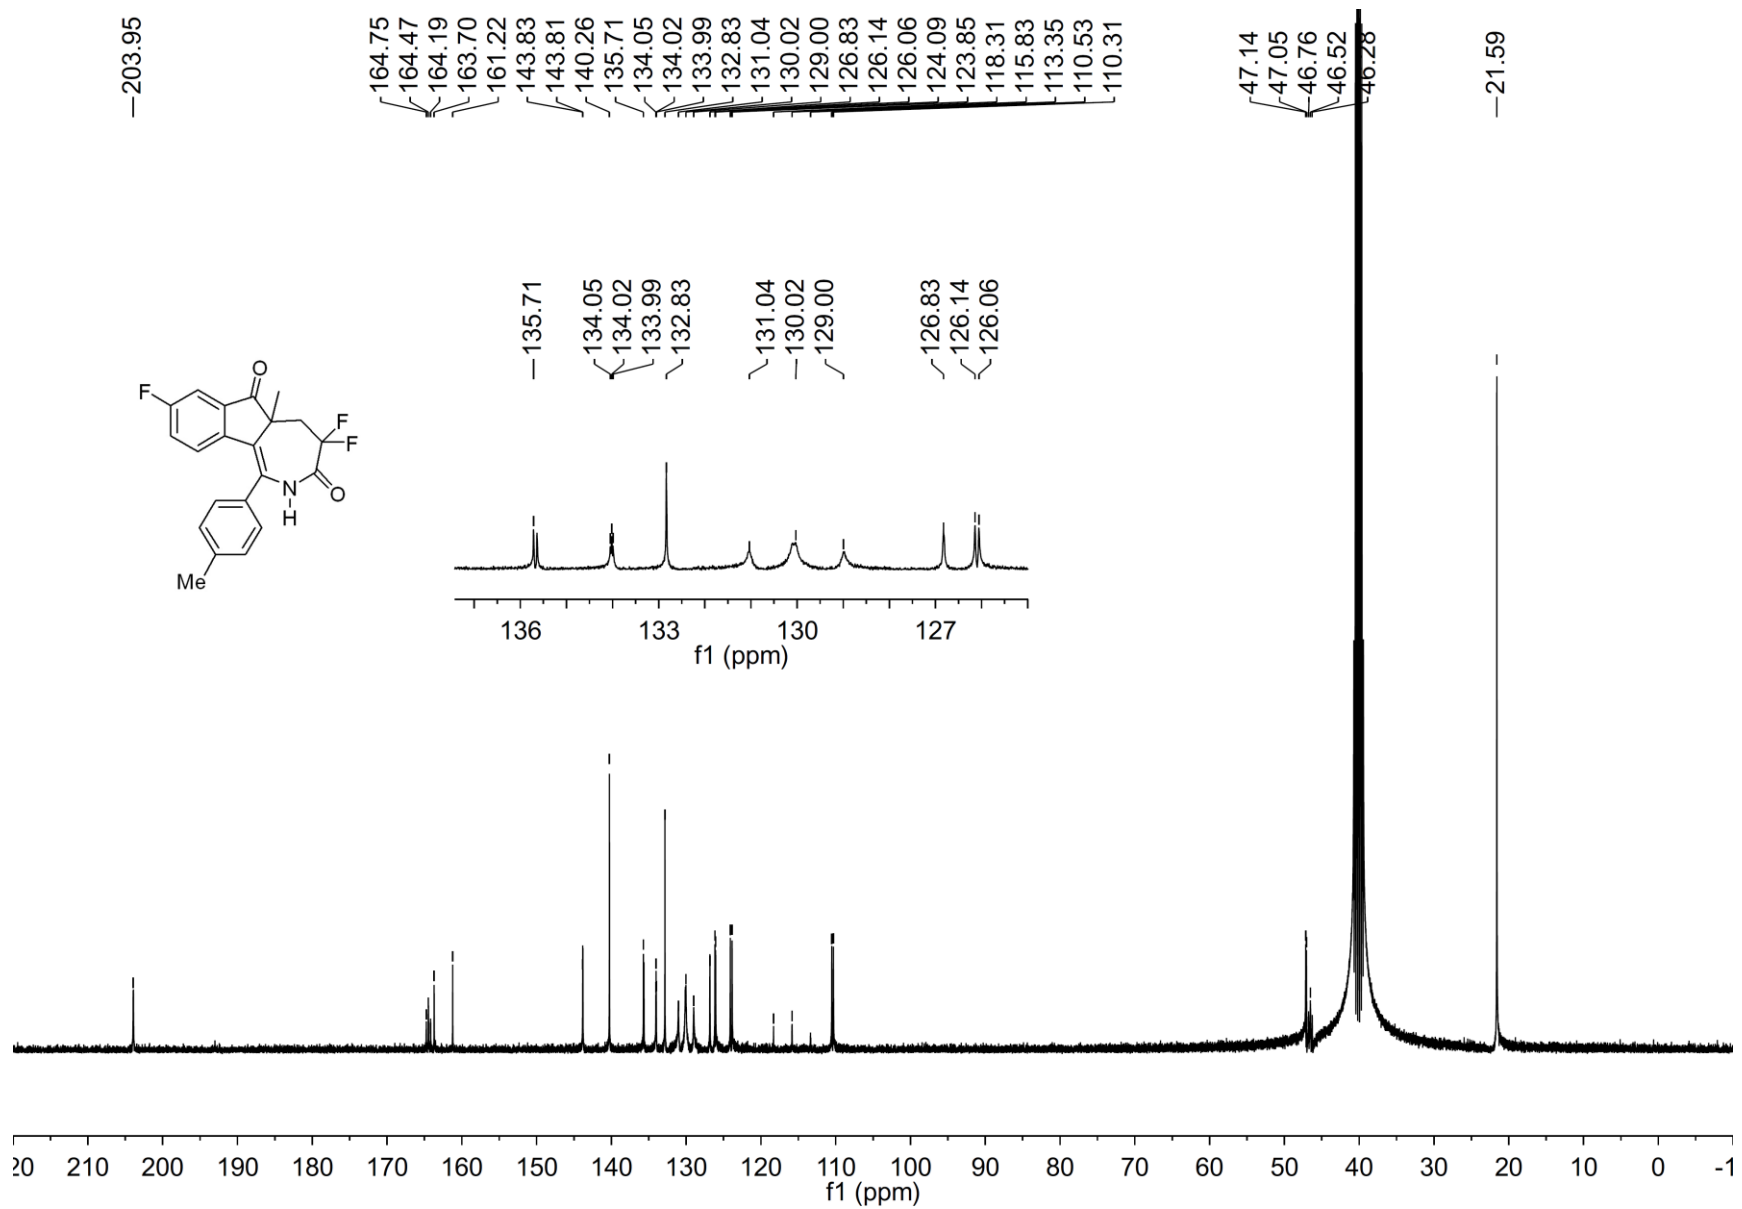

**<sup>13</sup>C NMR Spectrum of Compound 3j**

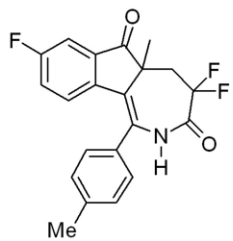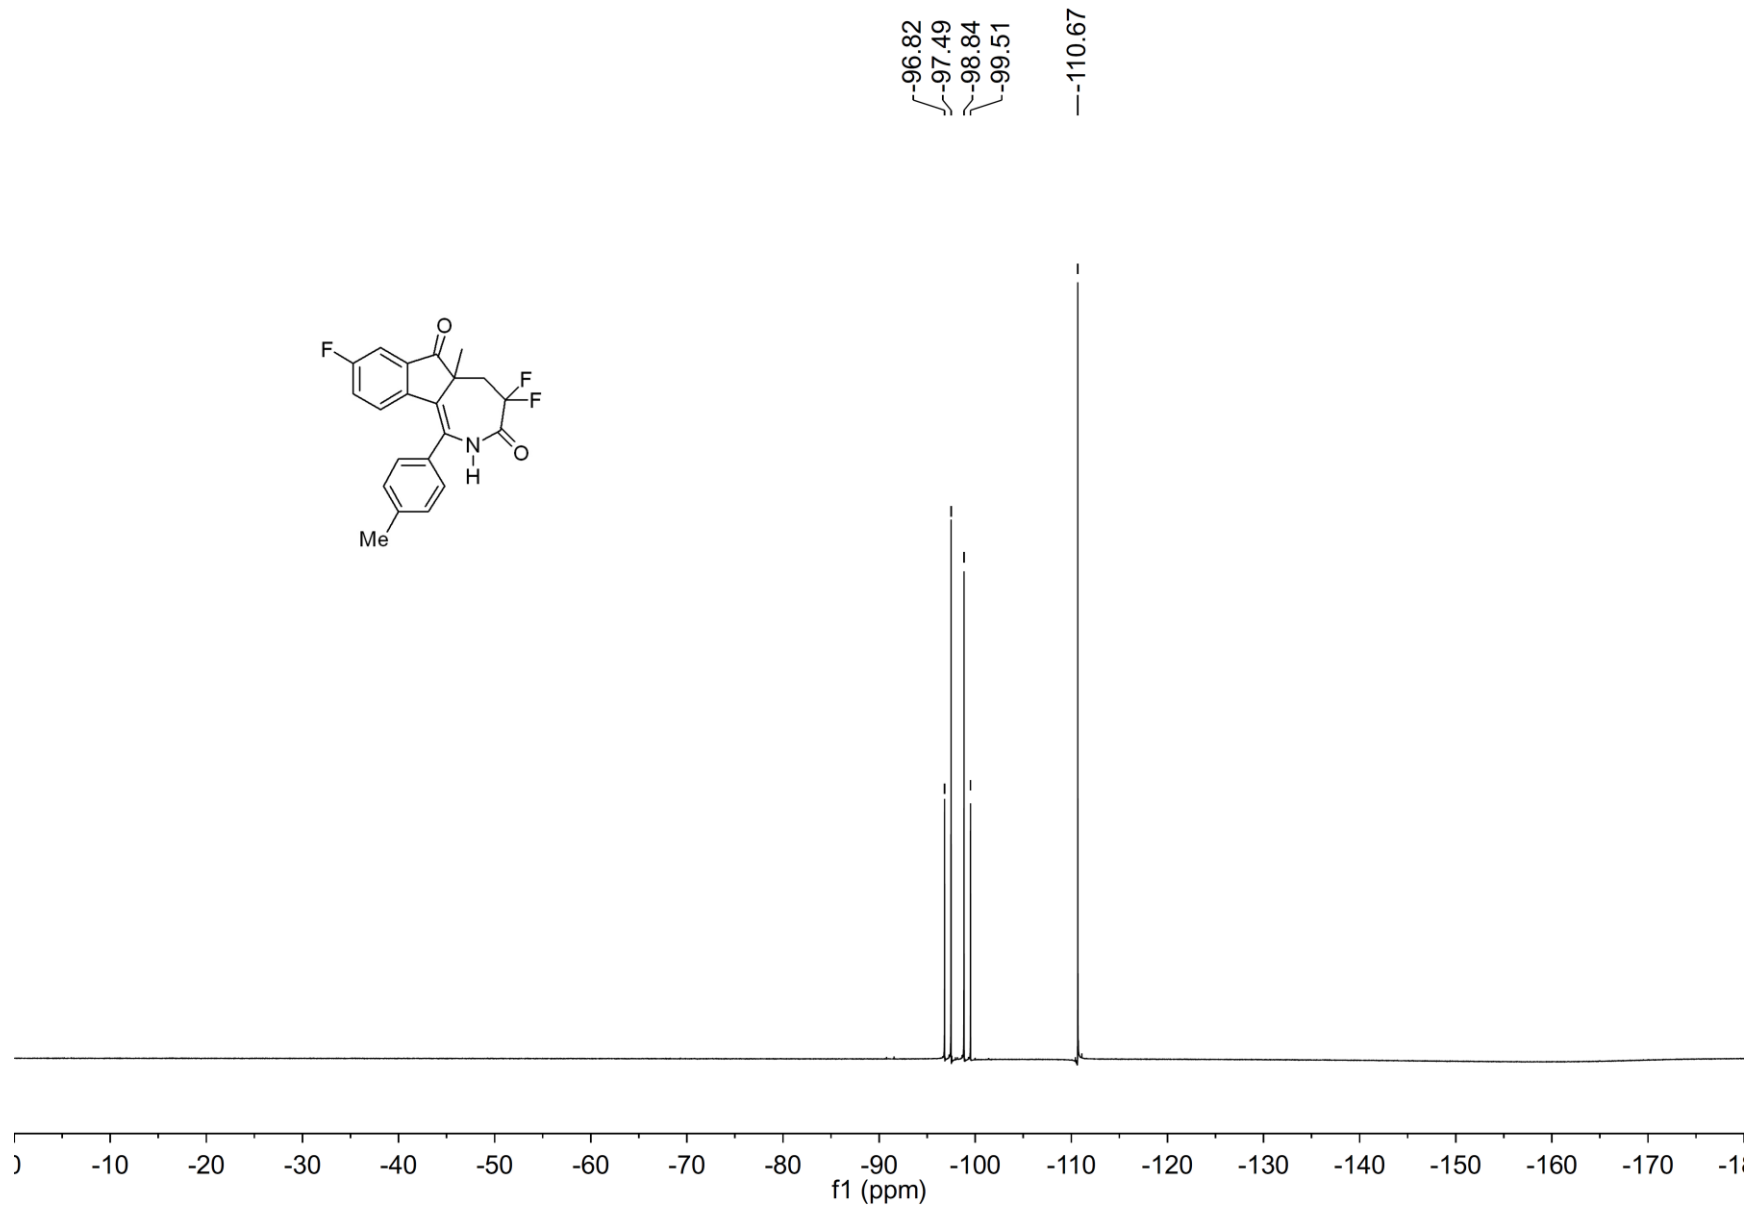

$^{19}\text{F}$  NMR Spectrum of Compound 3j

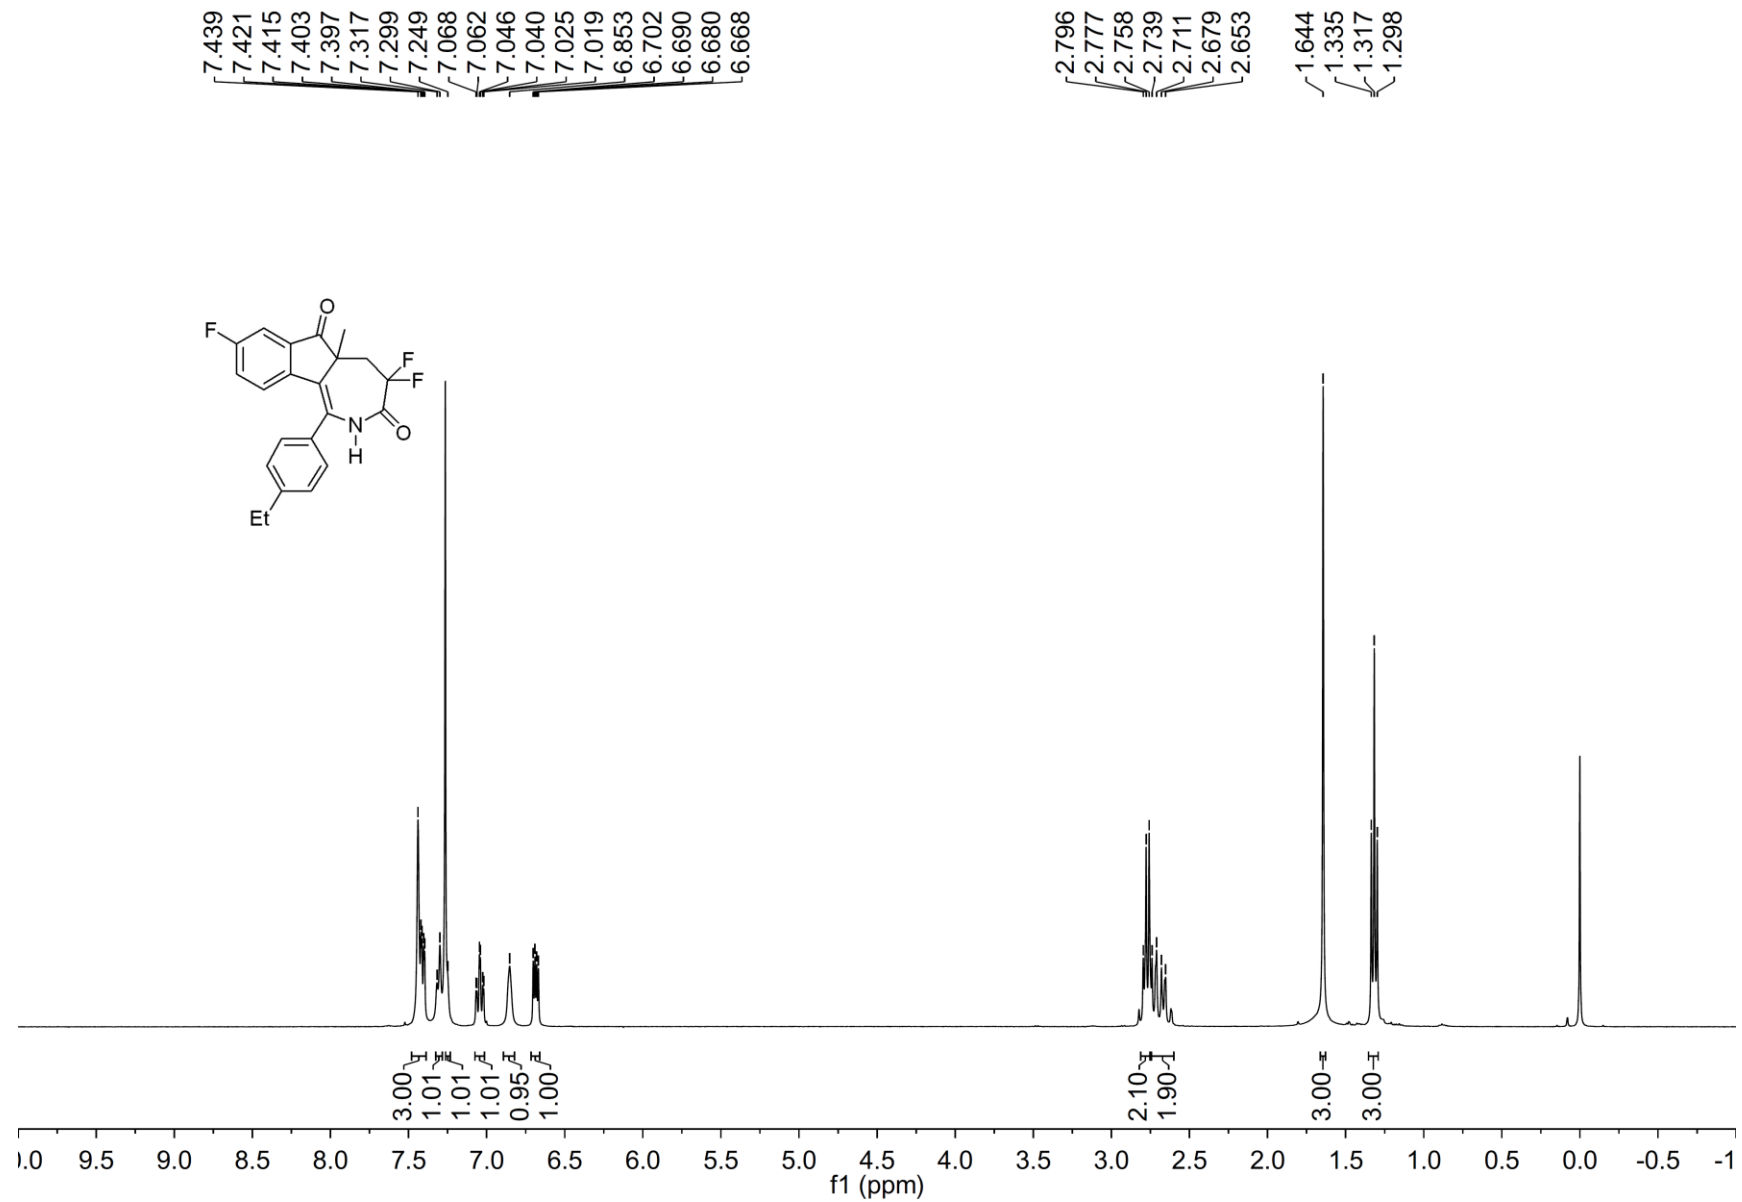

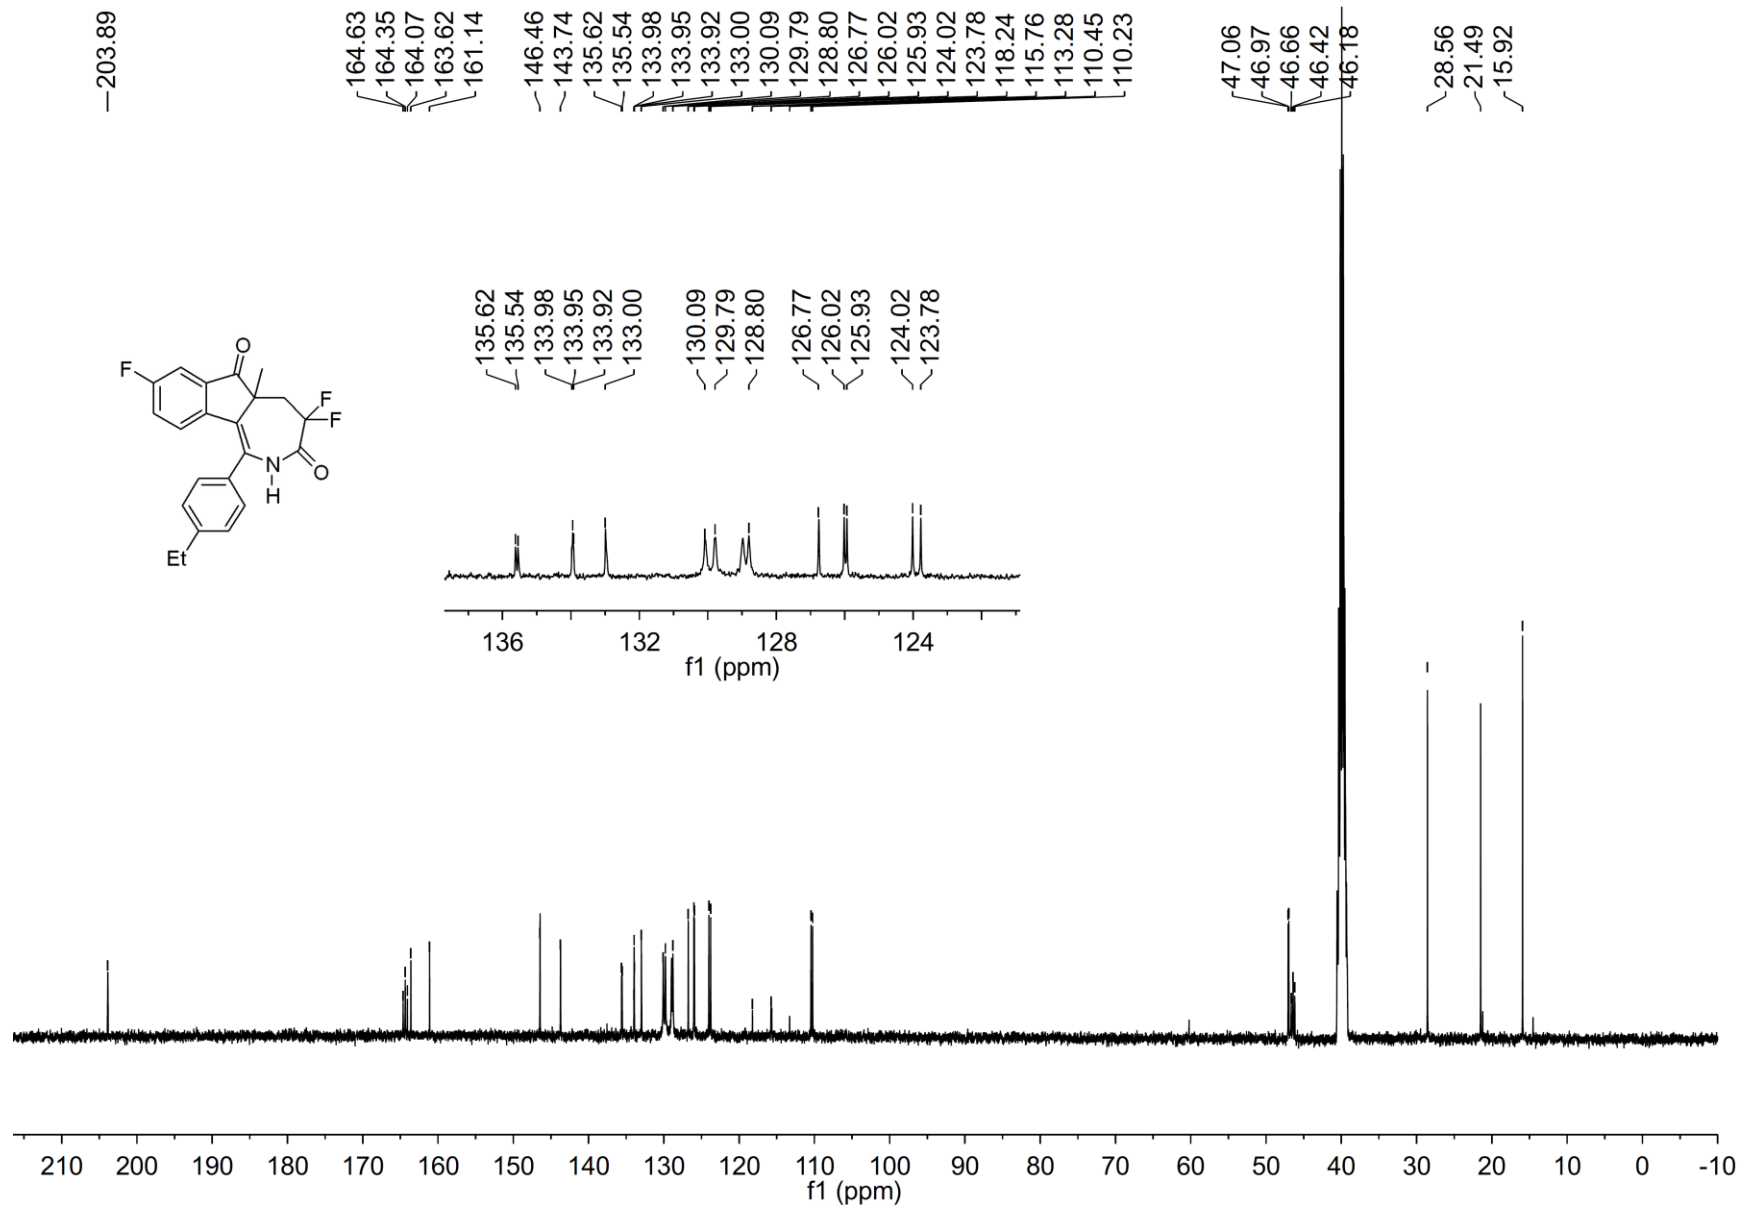

**<sup>13</sup>C NMR Spectrum of Compound 3k**

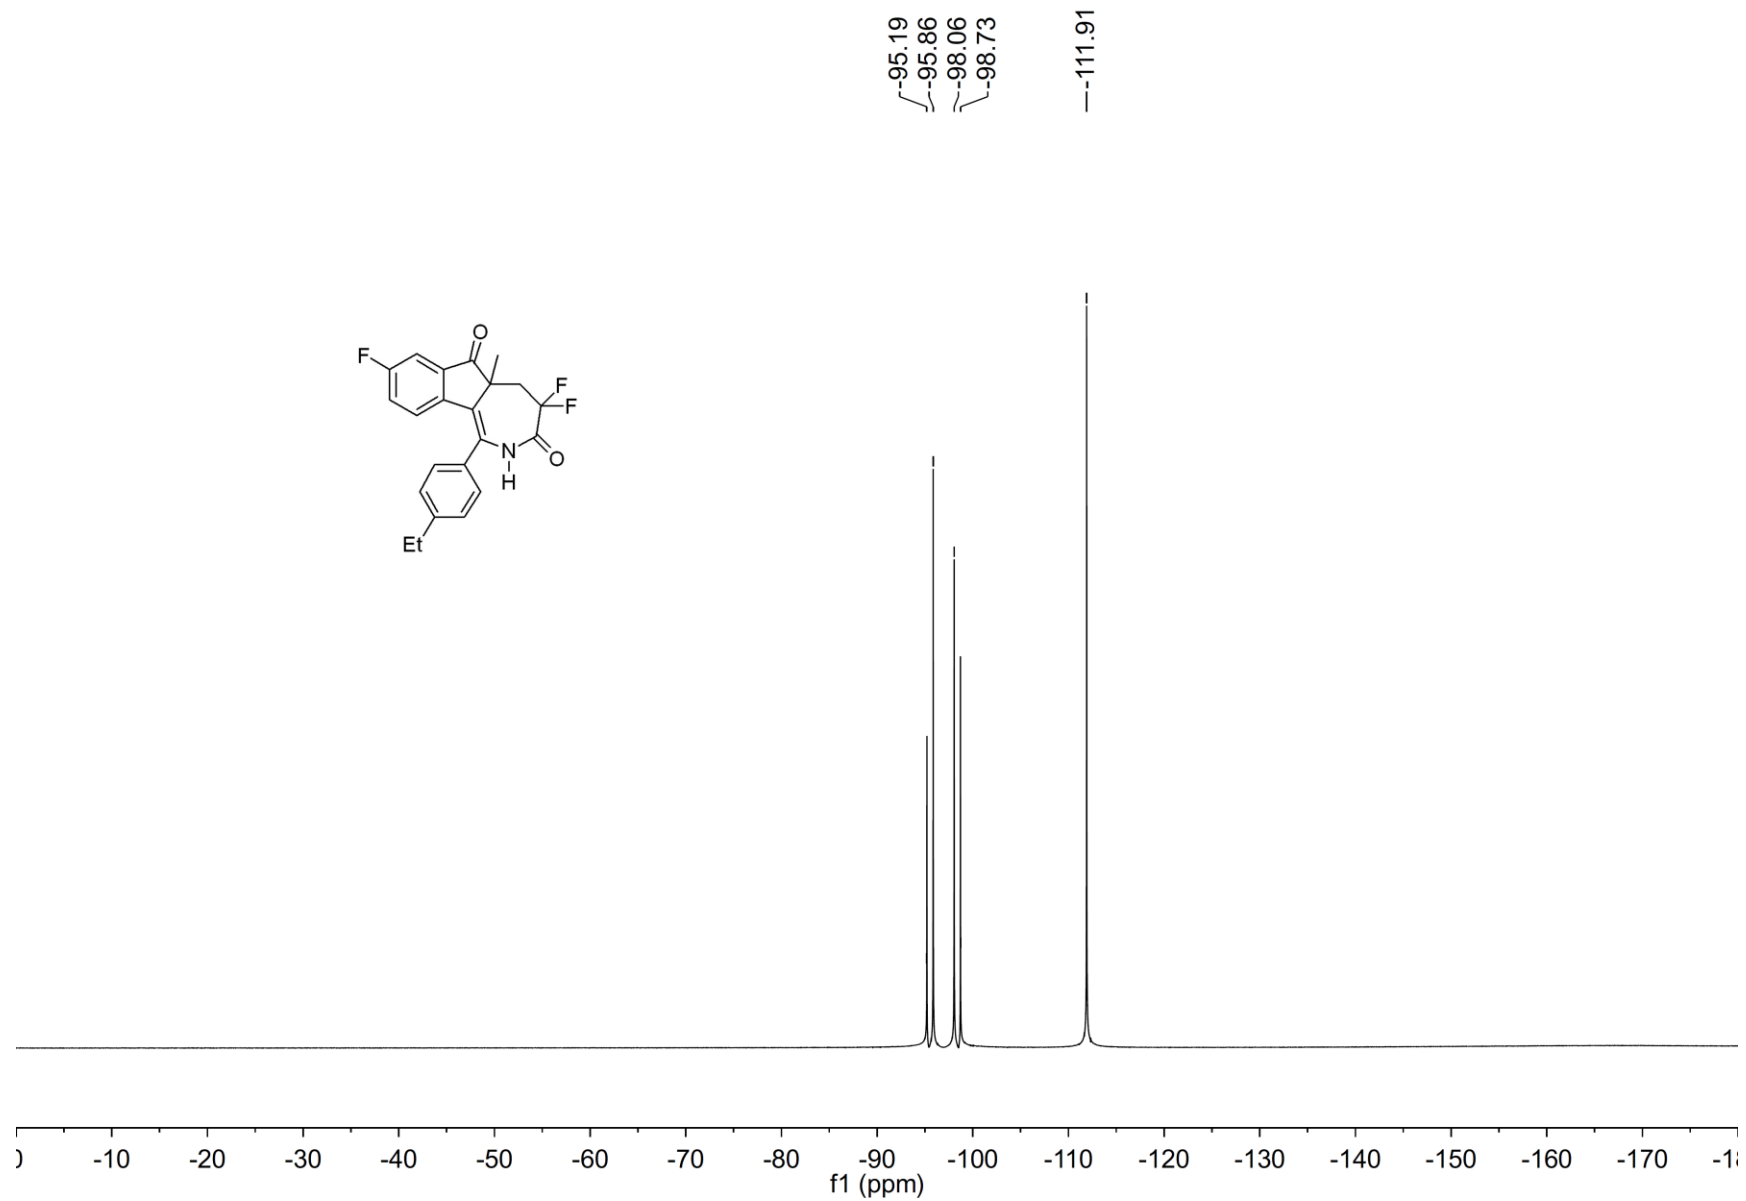

$^{19}\text{F}$  NMR Spectrum of Compound 3k

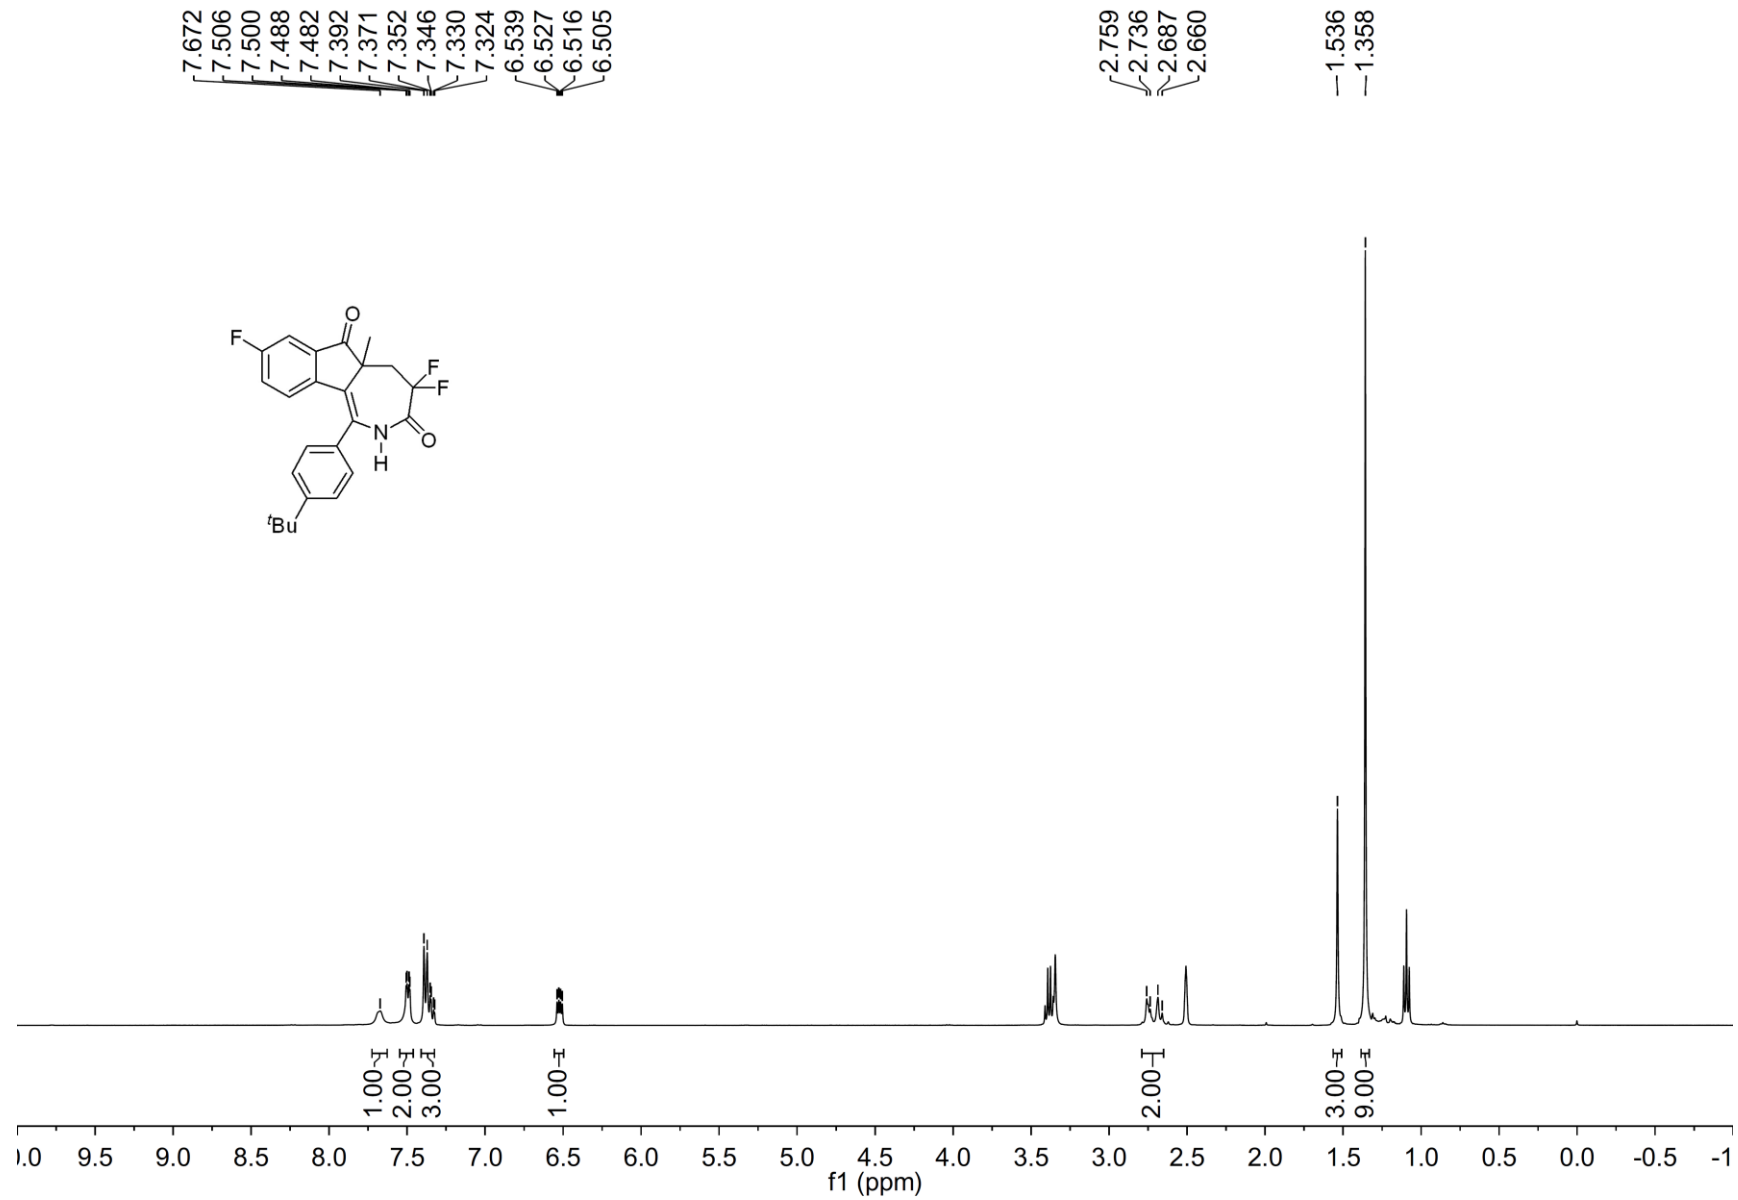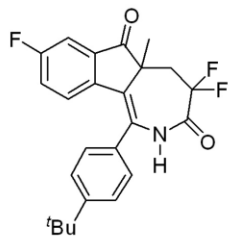

<sup>1</sup>H NMR Spectrum of Compound 3I

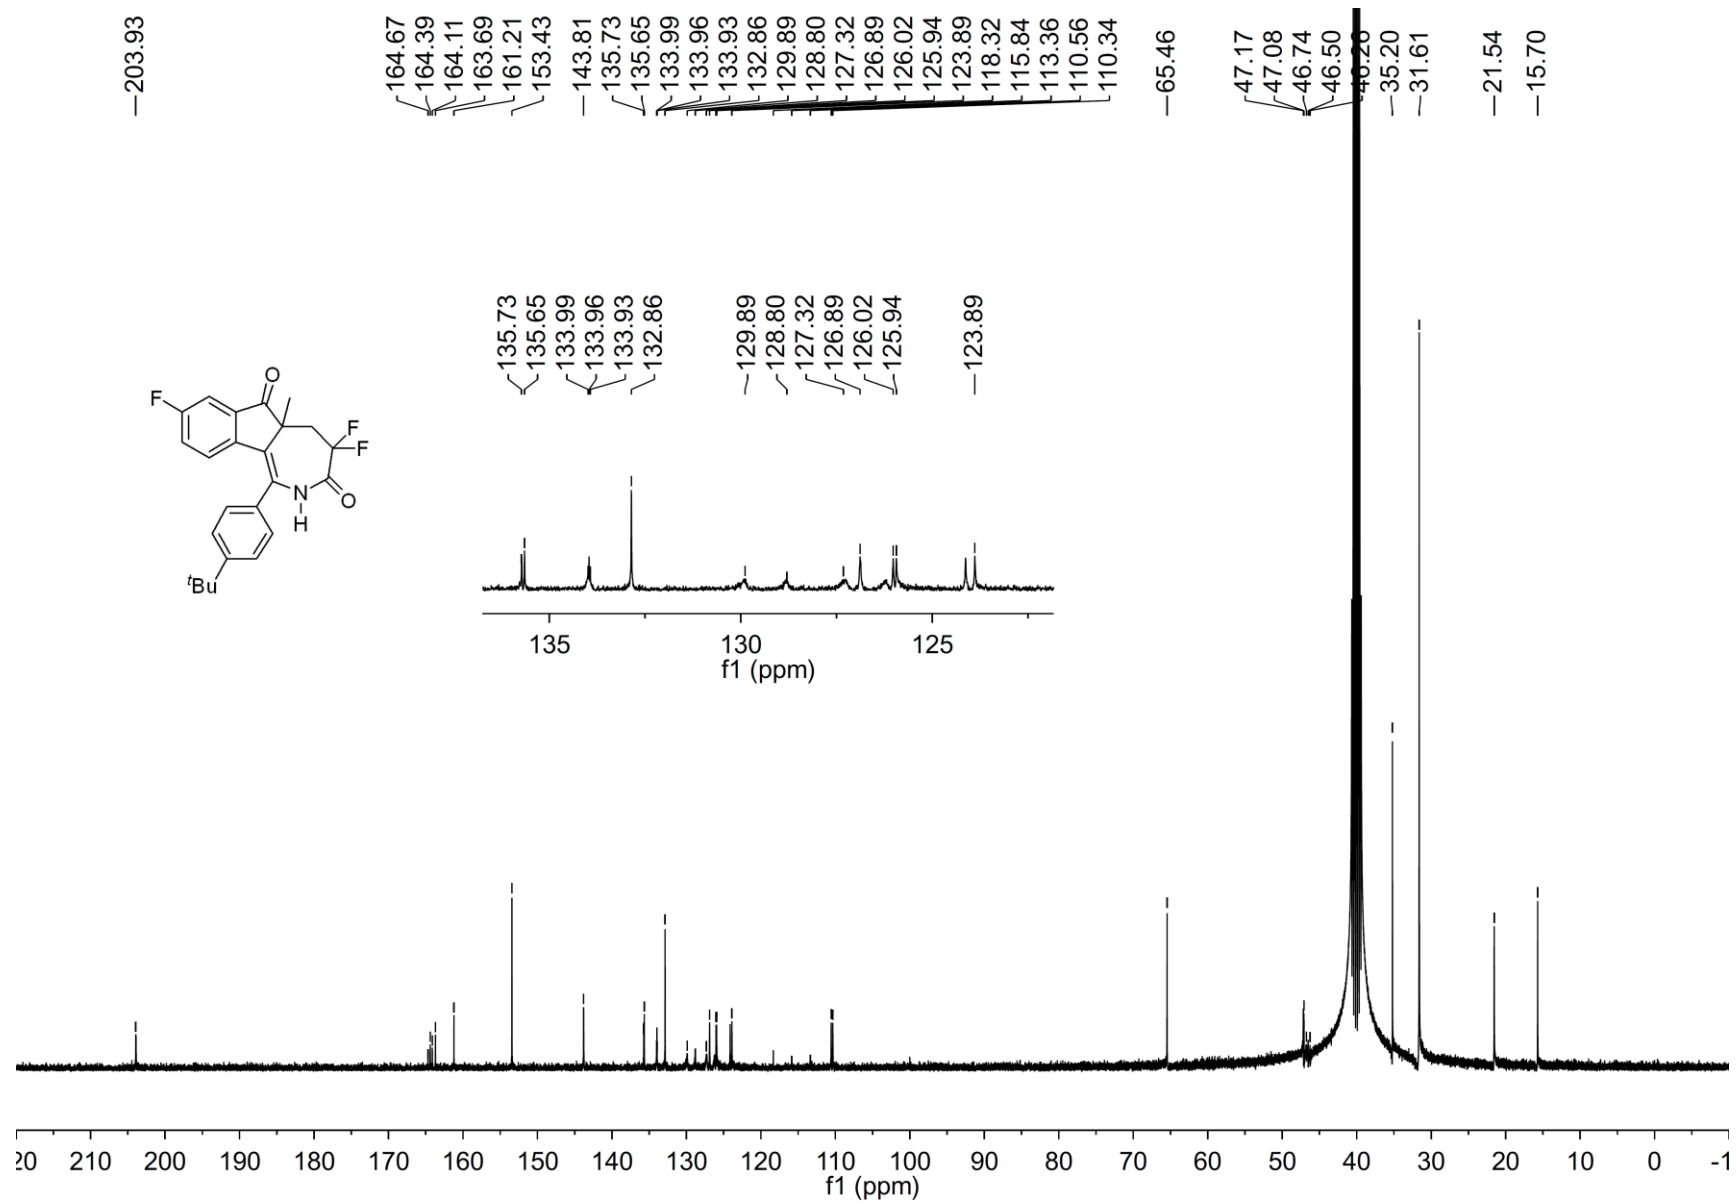

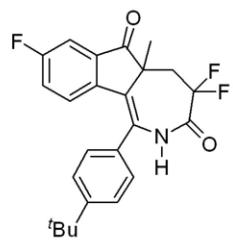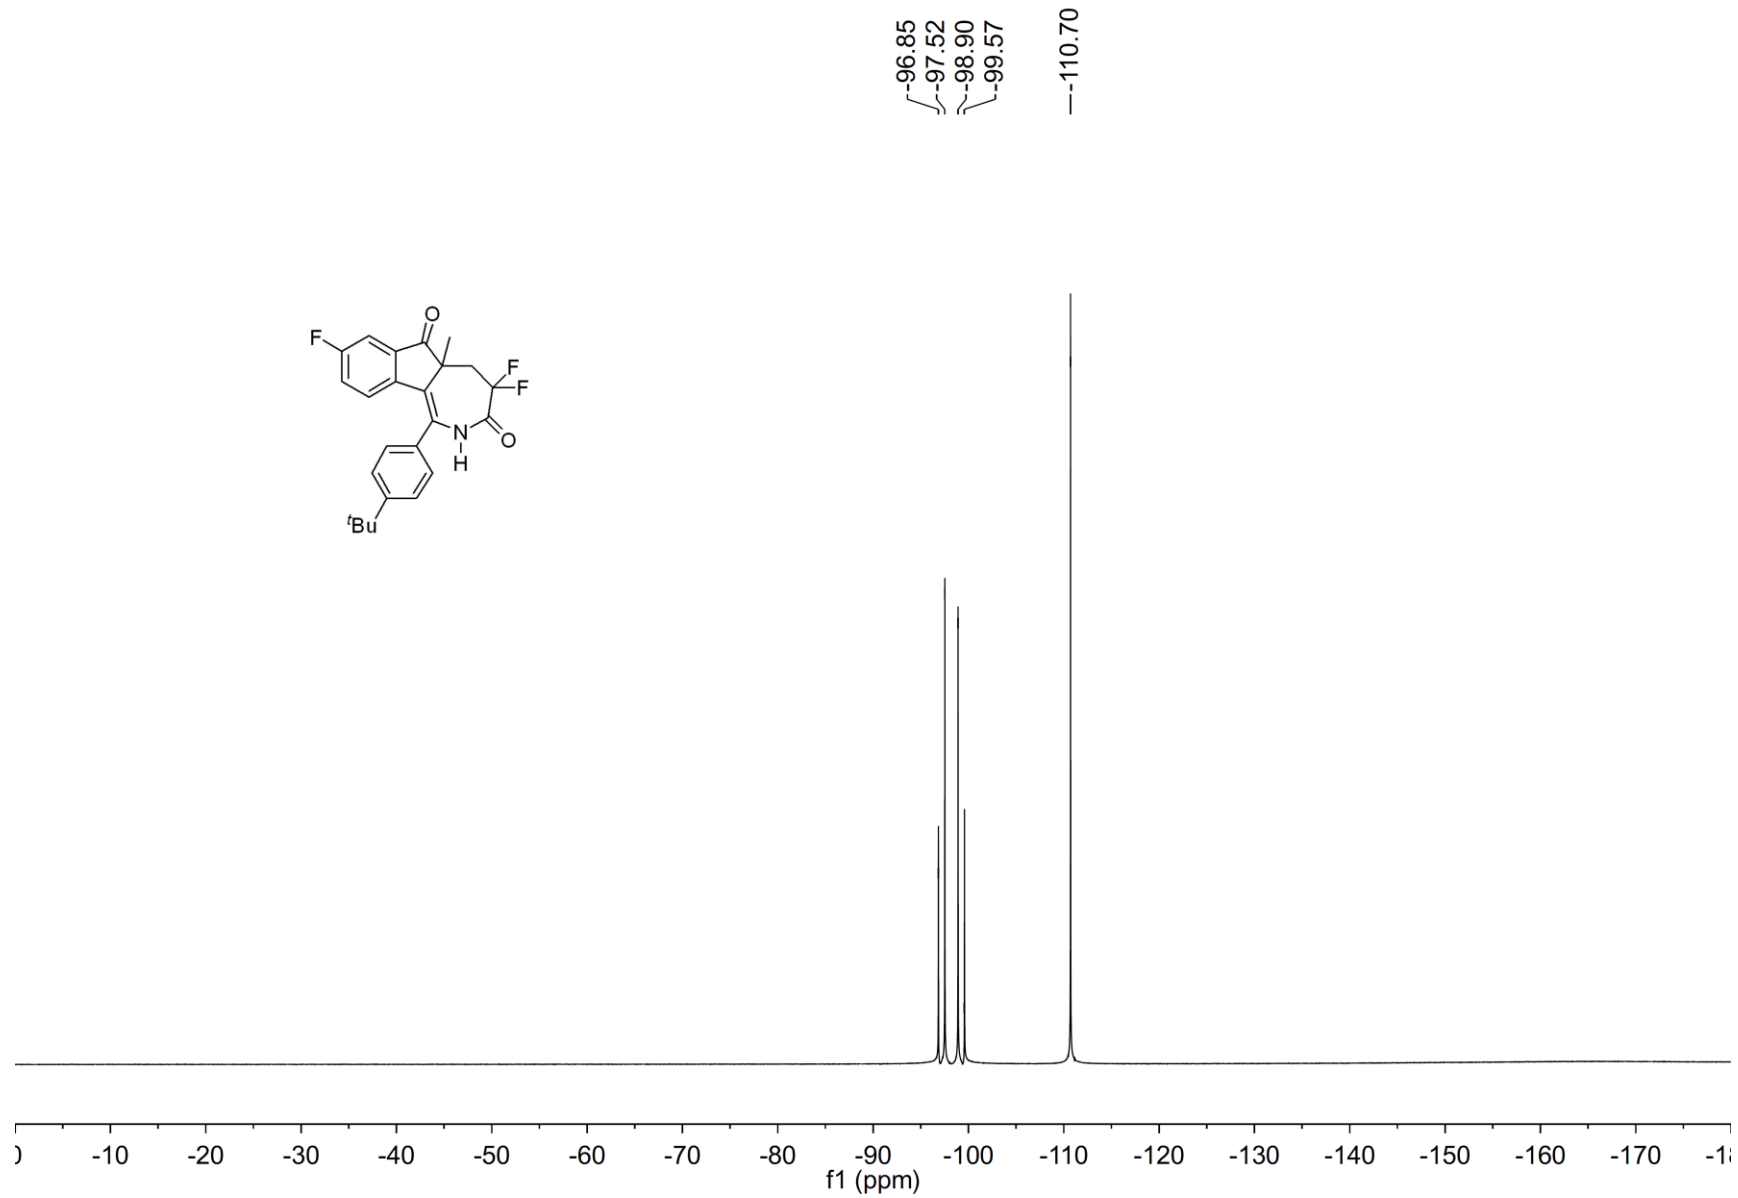

$^{19}\text{F}$  NMR Spectrum of Compound 31



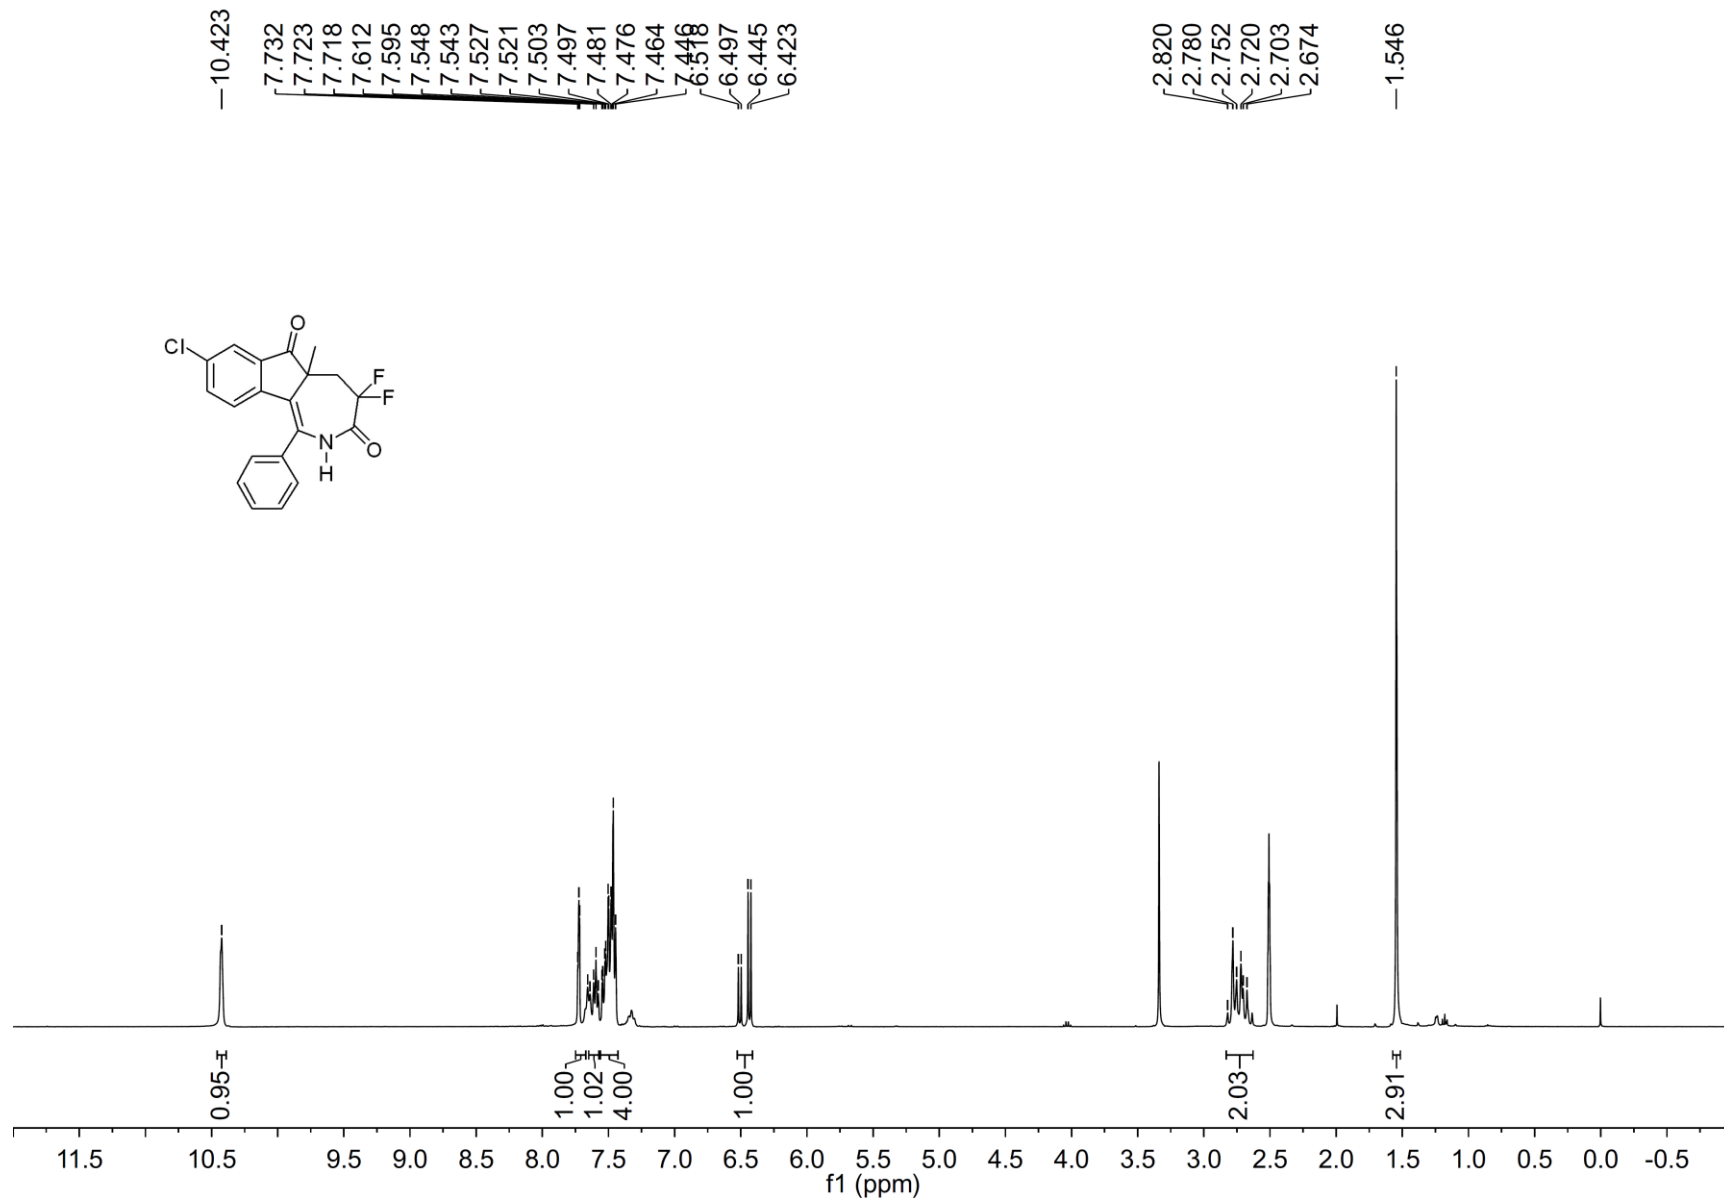

<sup>1</sup>H NMR Spectrum of Compound 3m

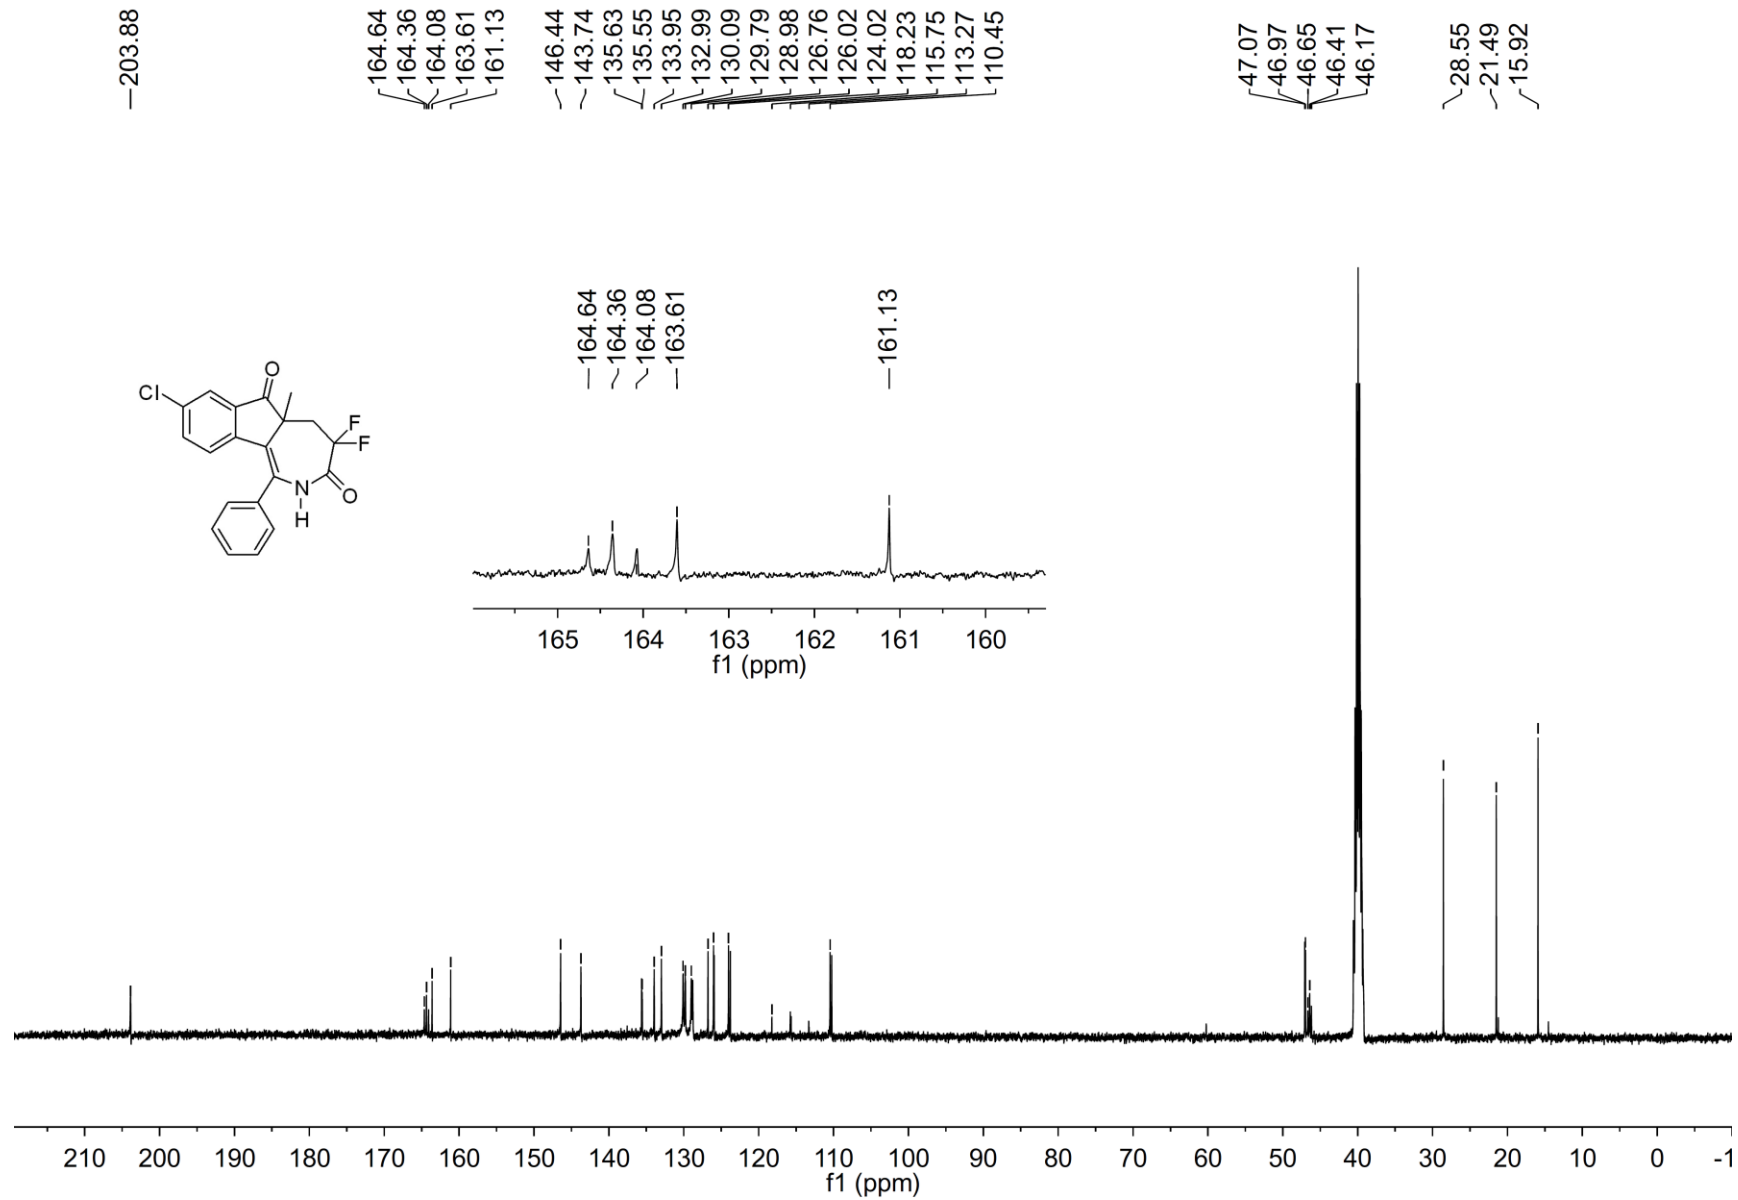

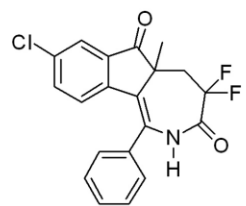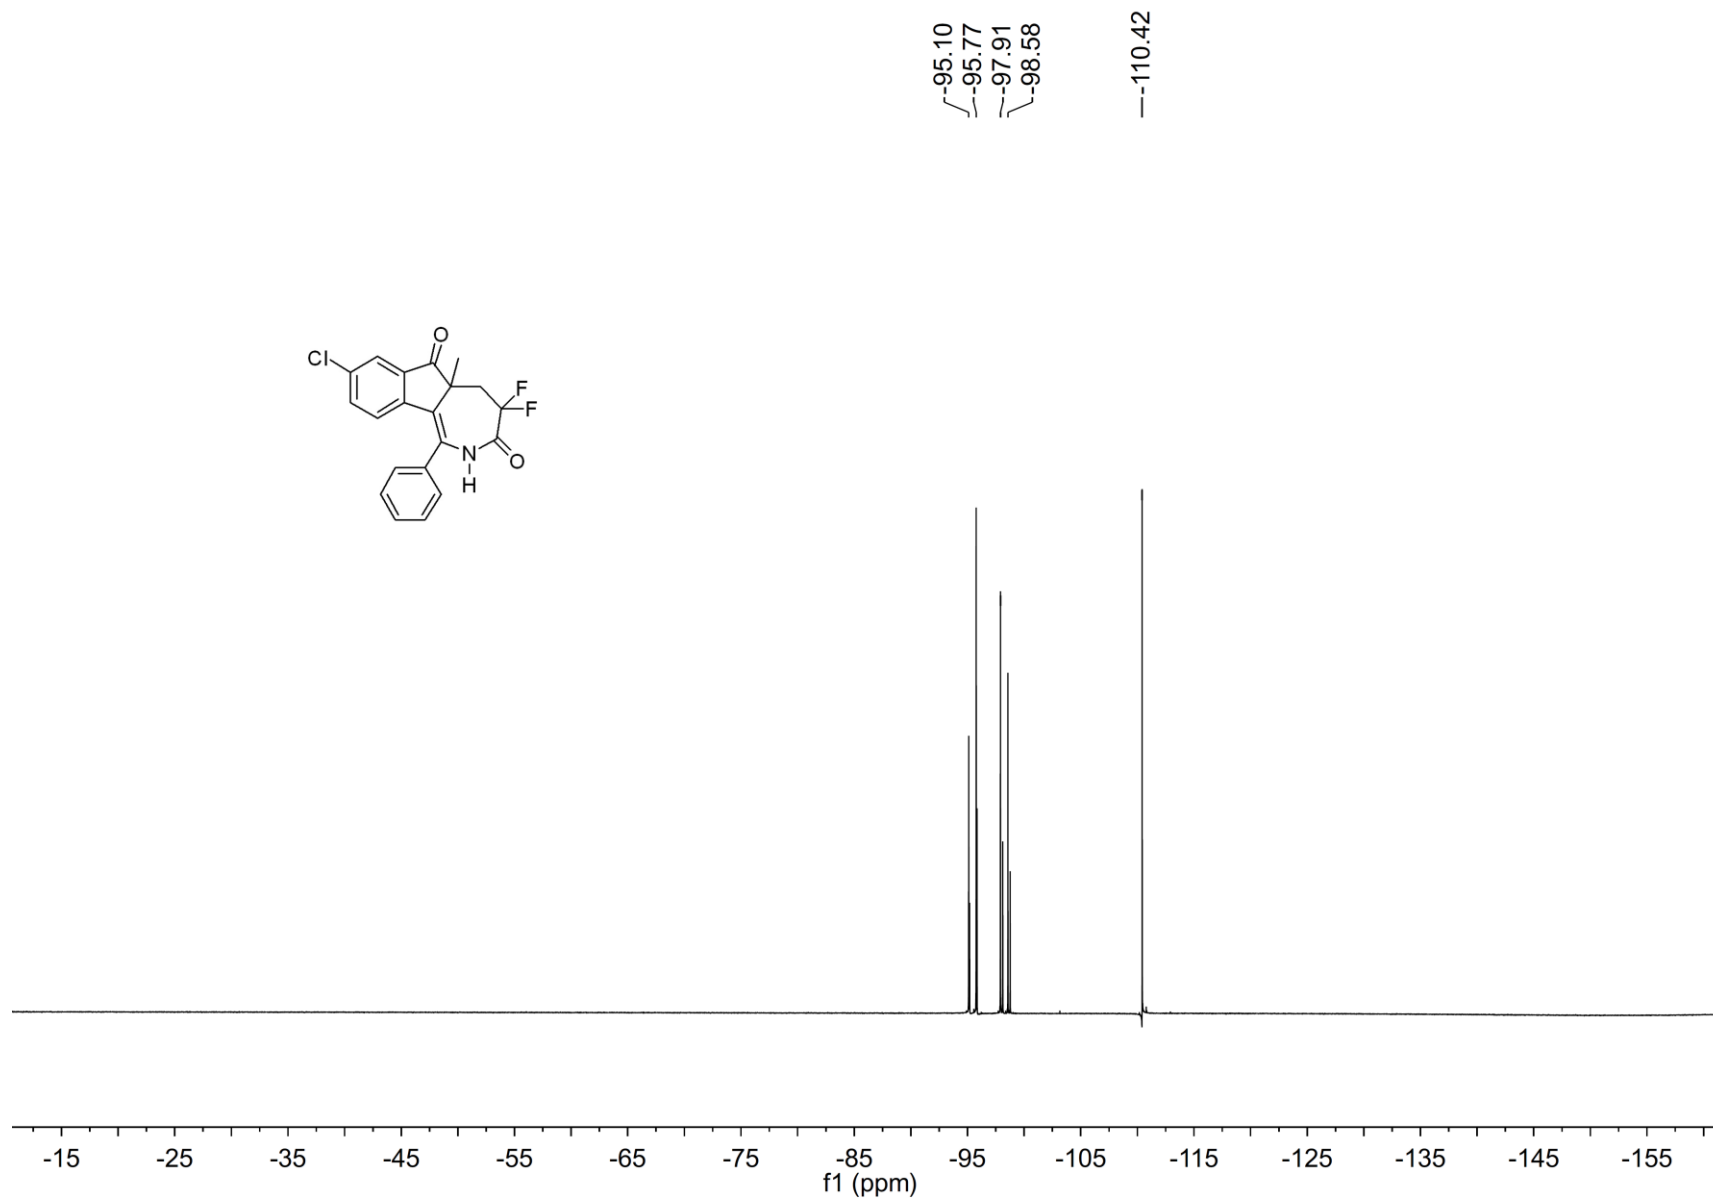

$^{19}\text{F}$  NMR Spectrum of Compound 3m

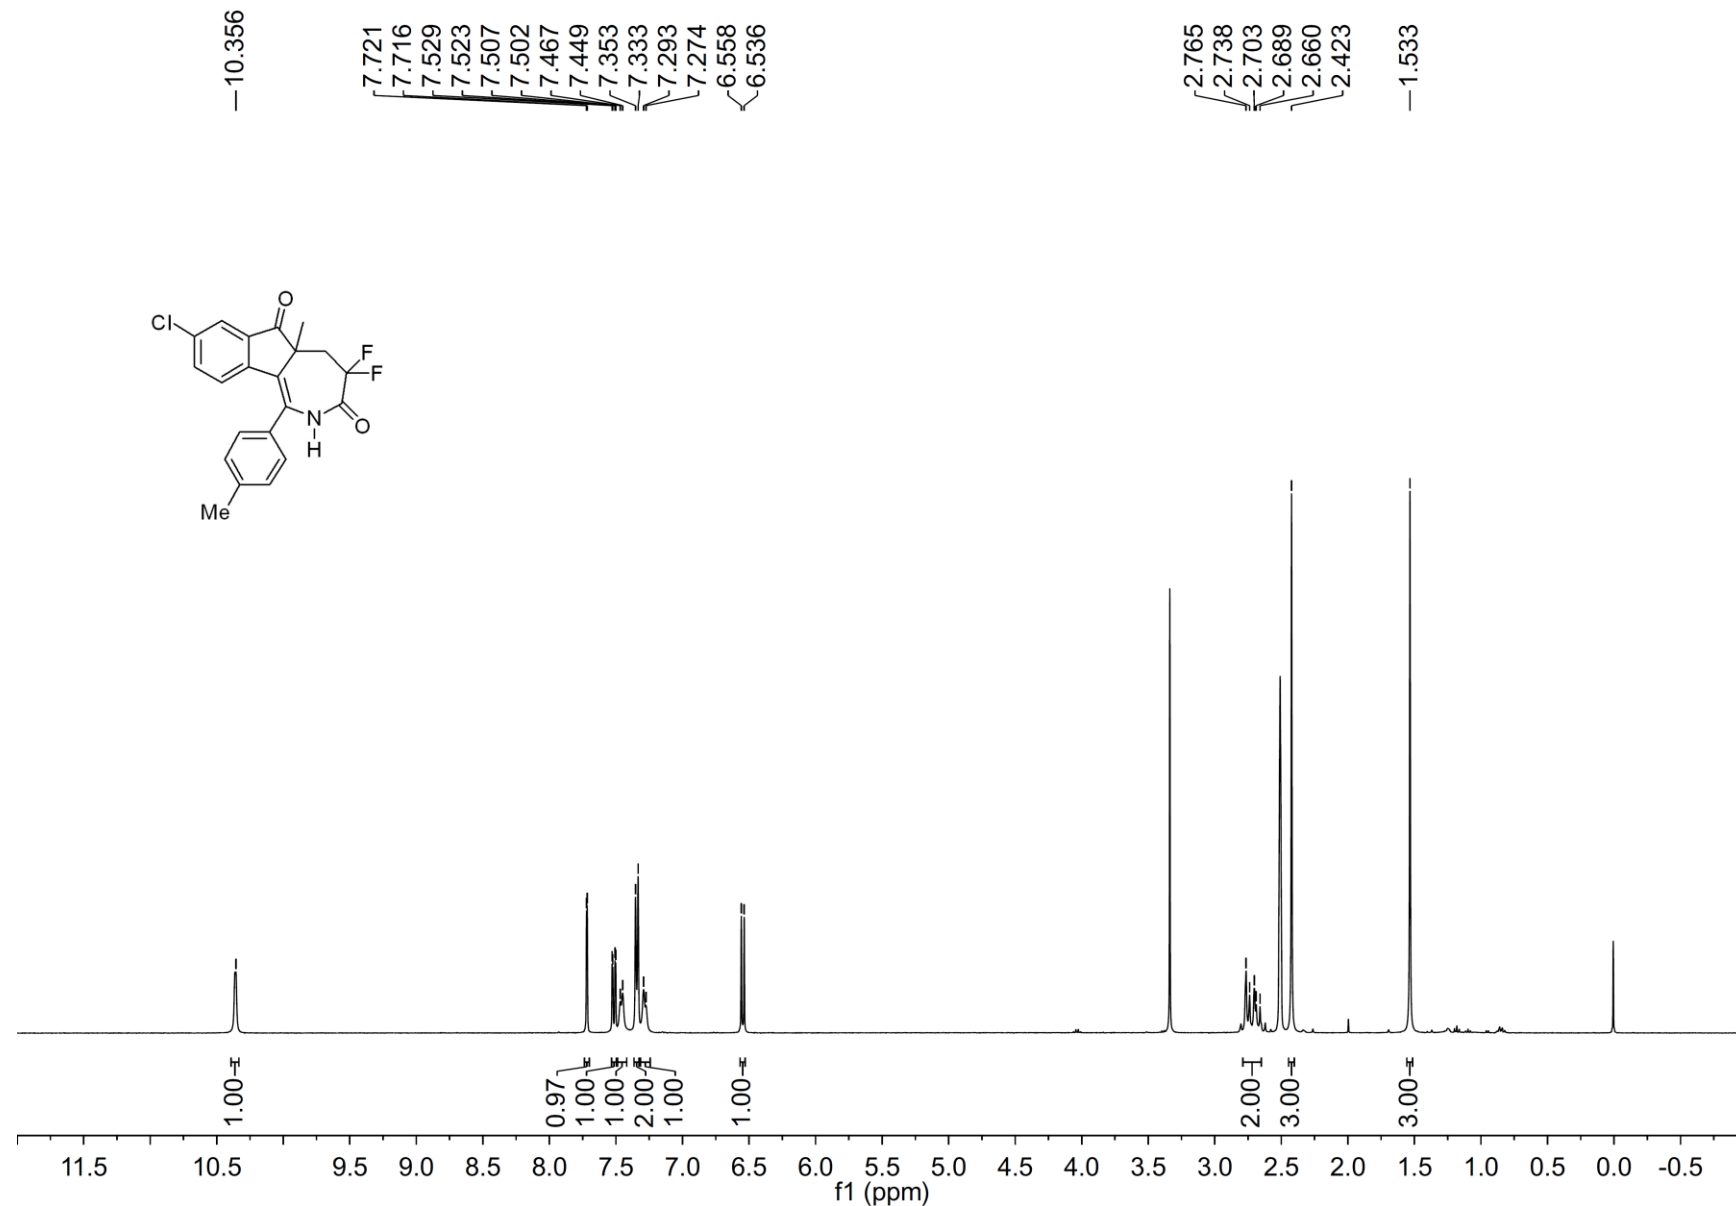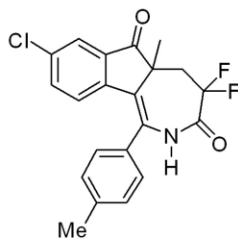

<sup>1</sup>H NMR Spectrum of Compound 3n

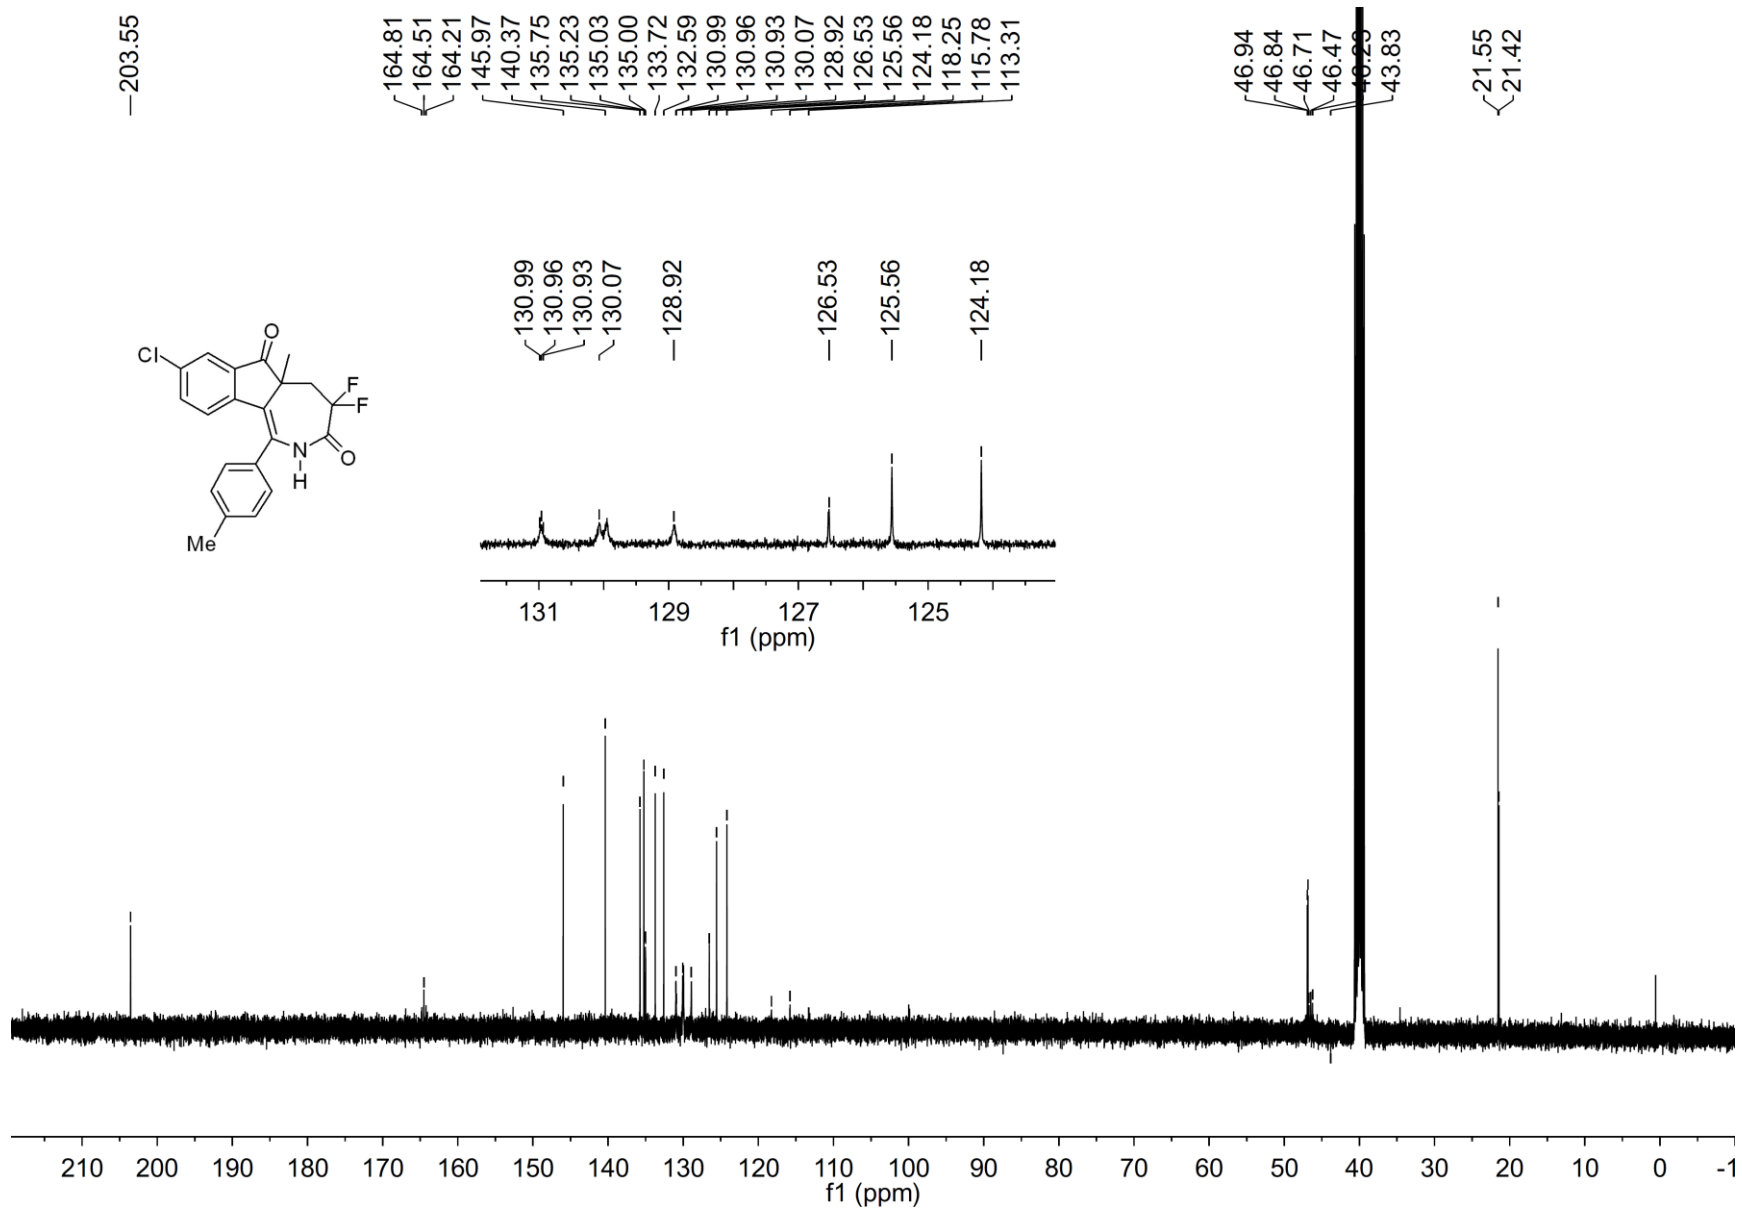

<sup>13</sup>C NMR Spectrum of Compound 3n

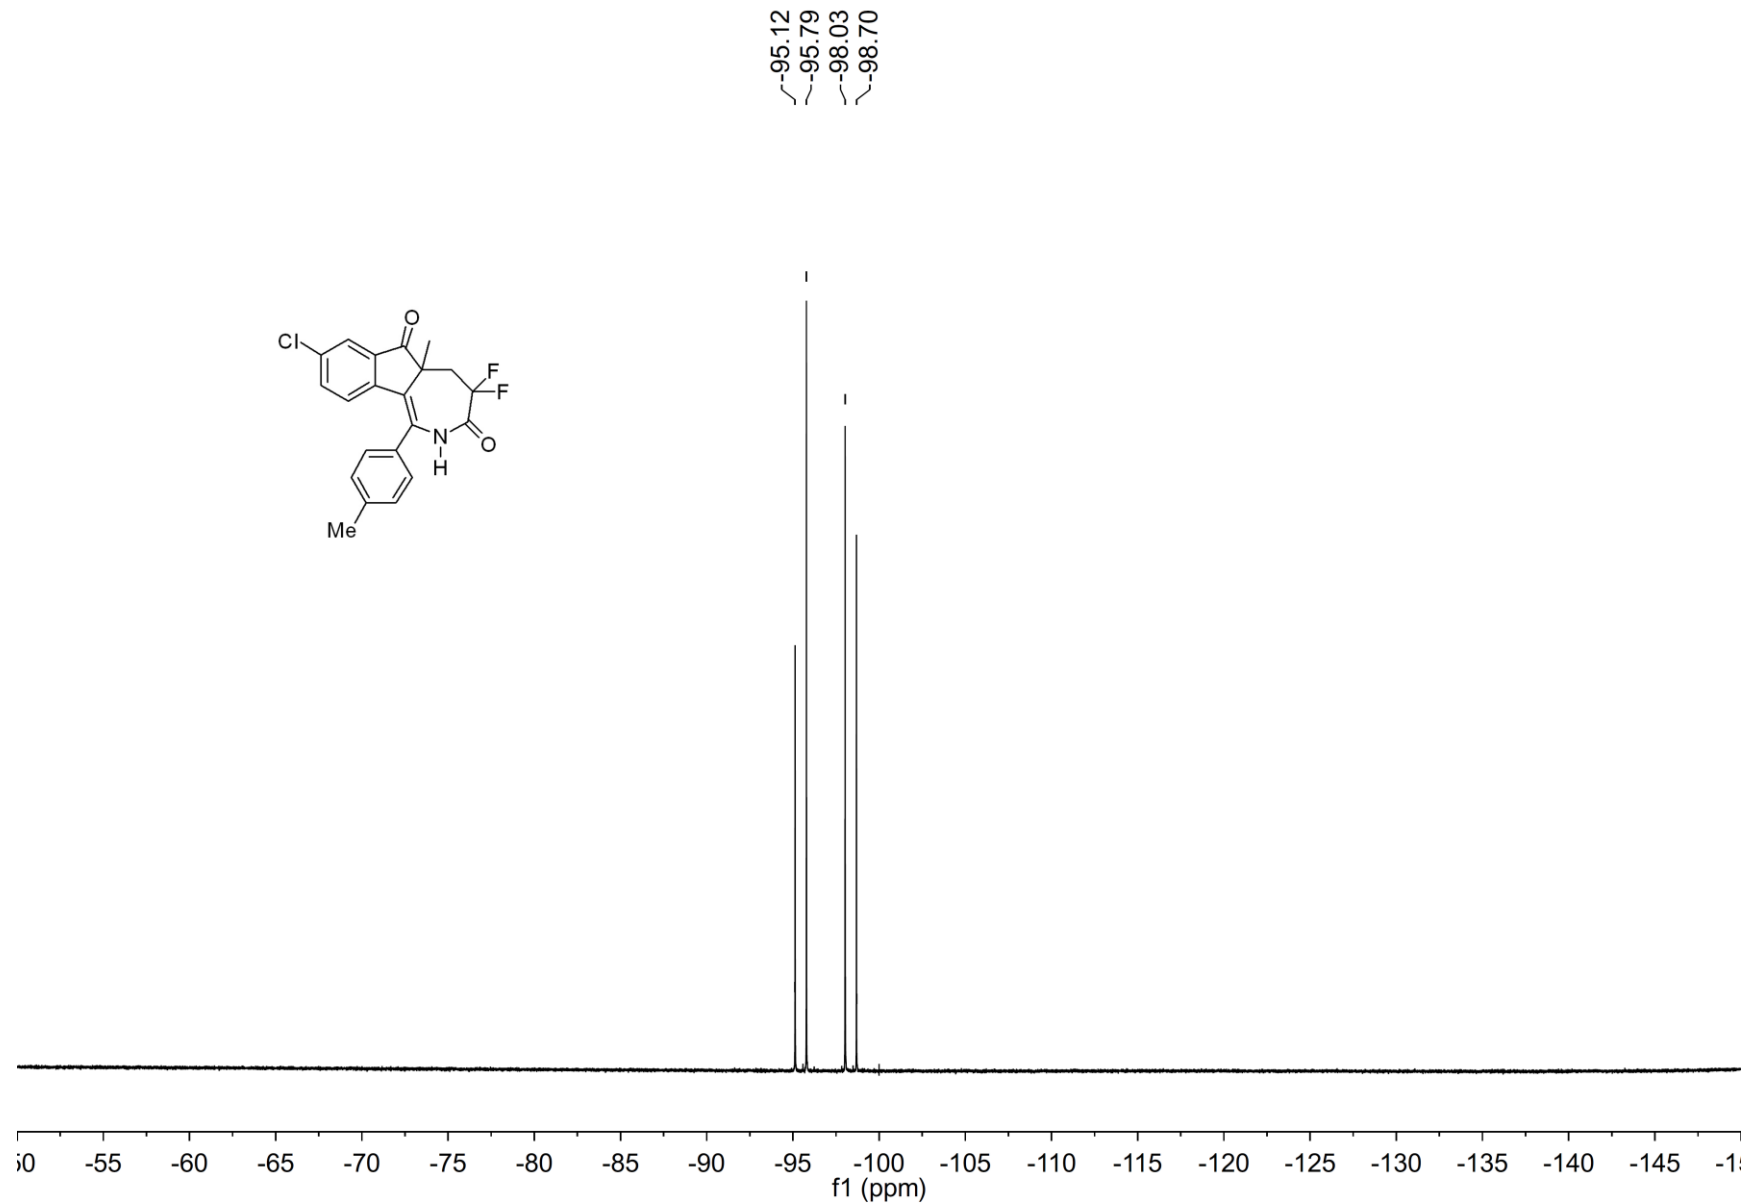

$^{19}\text{F}$  NMR Spectrum of Compound 3n

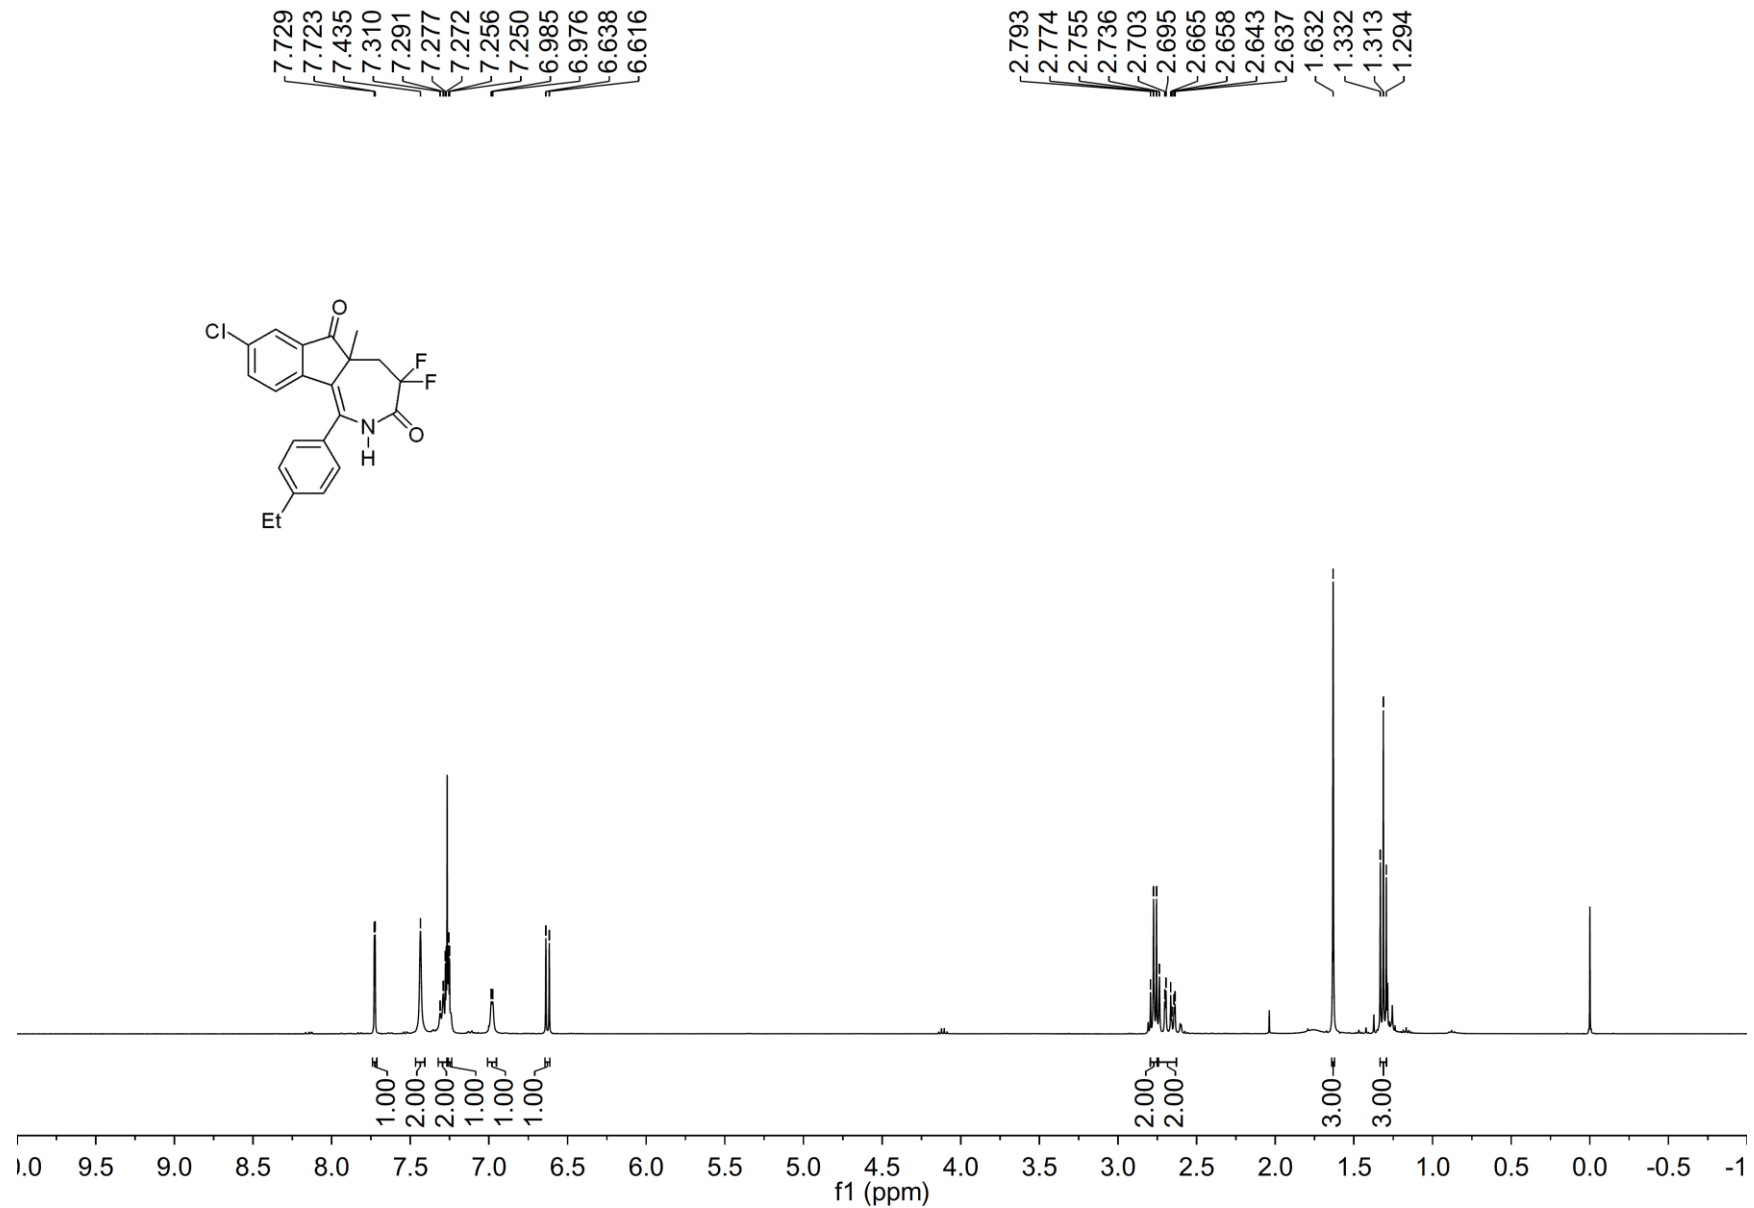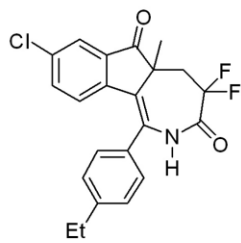

<sup>1</sup>H NMR Spectrum of Compound 30

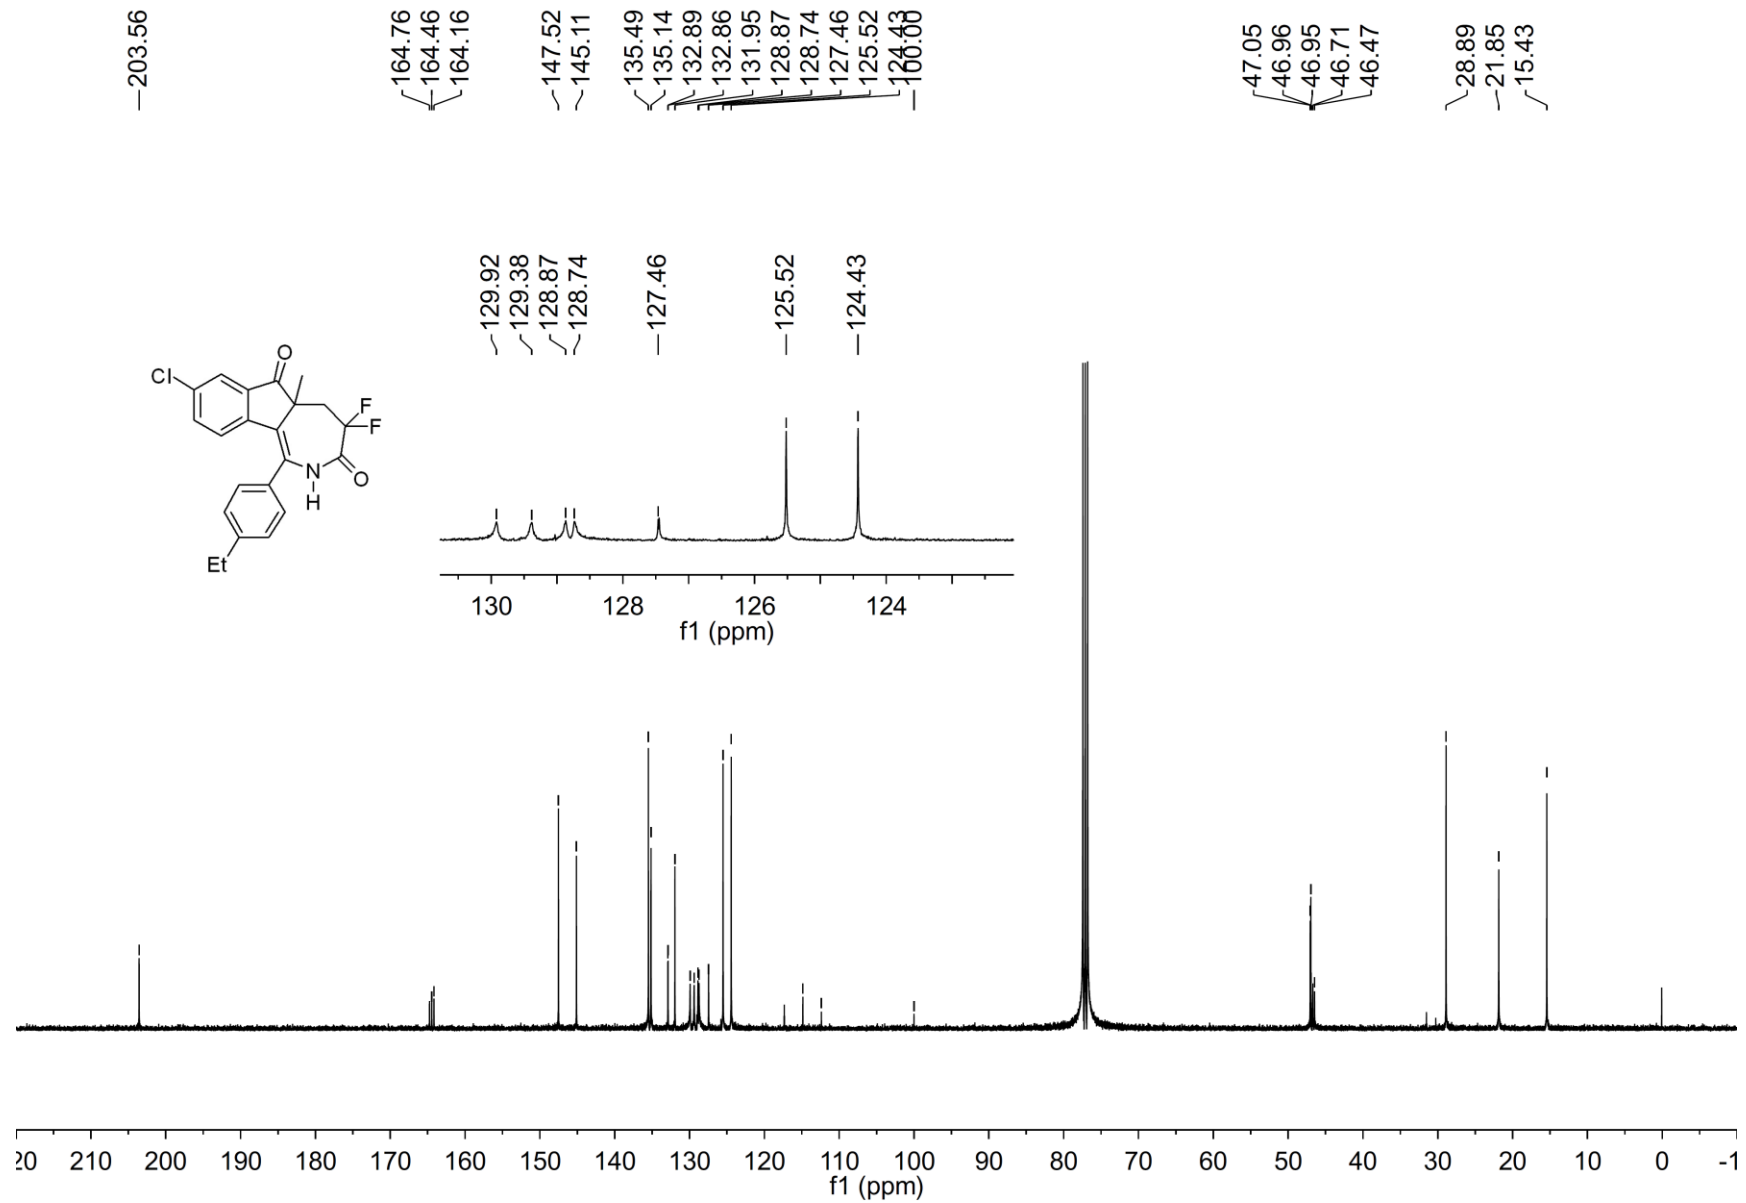



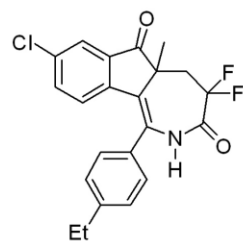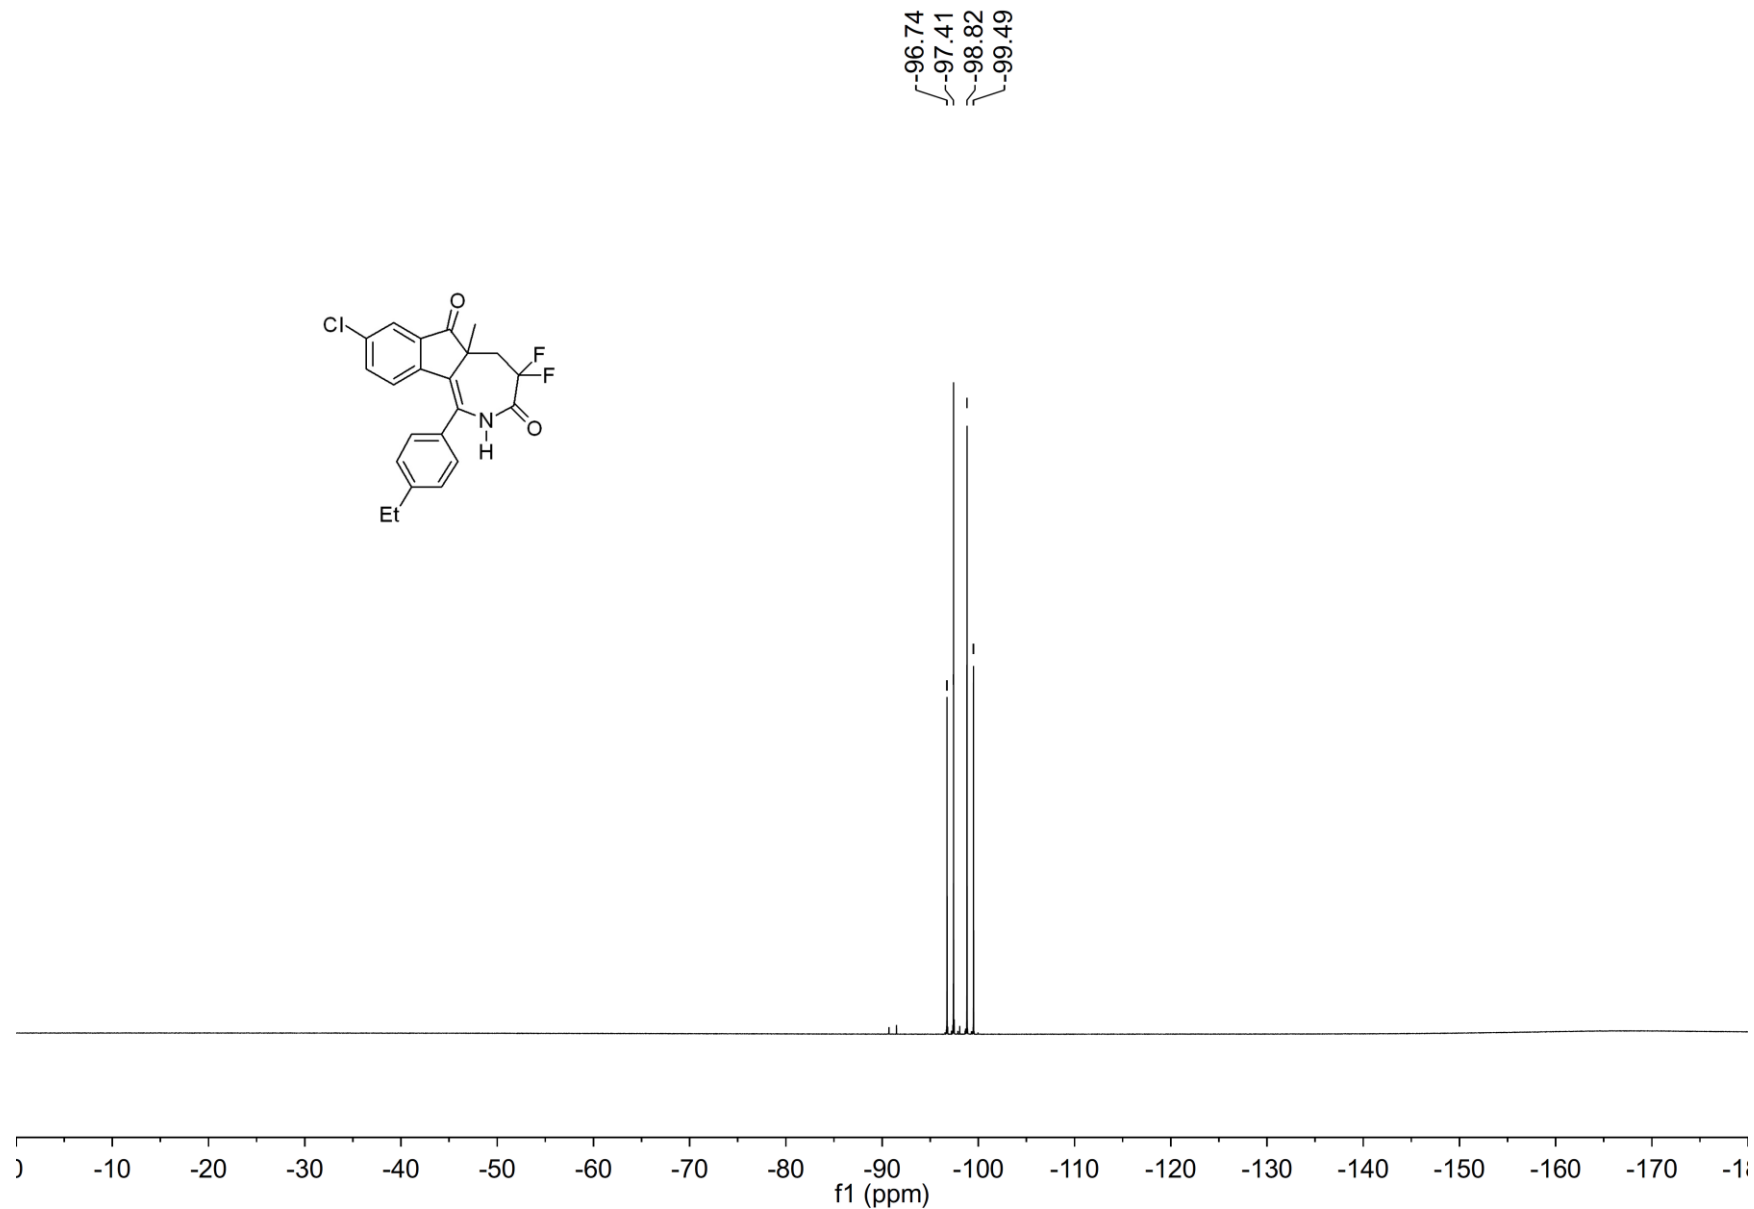

$^{19}\text{F}$  NMR Spectrum of Compound 30

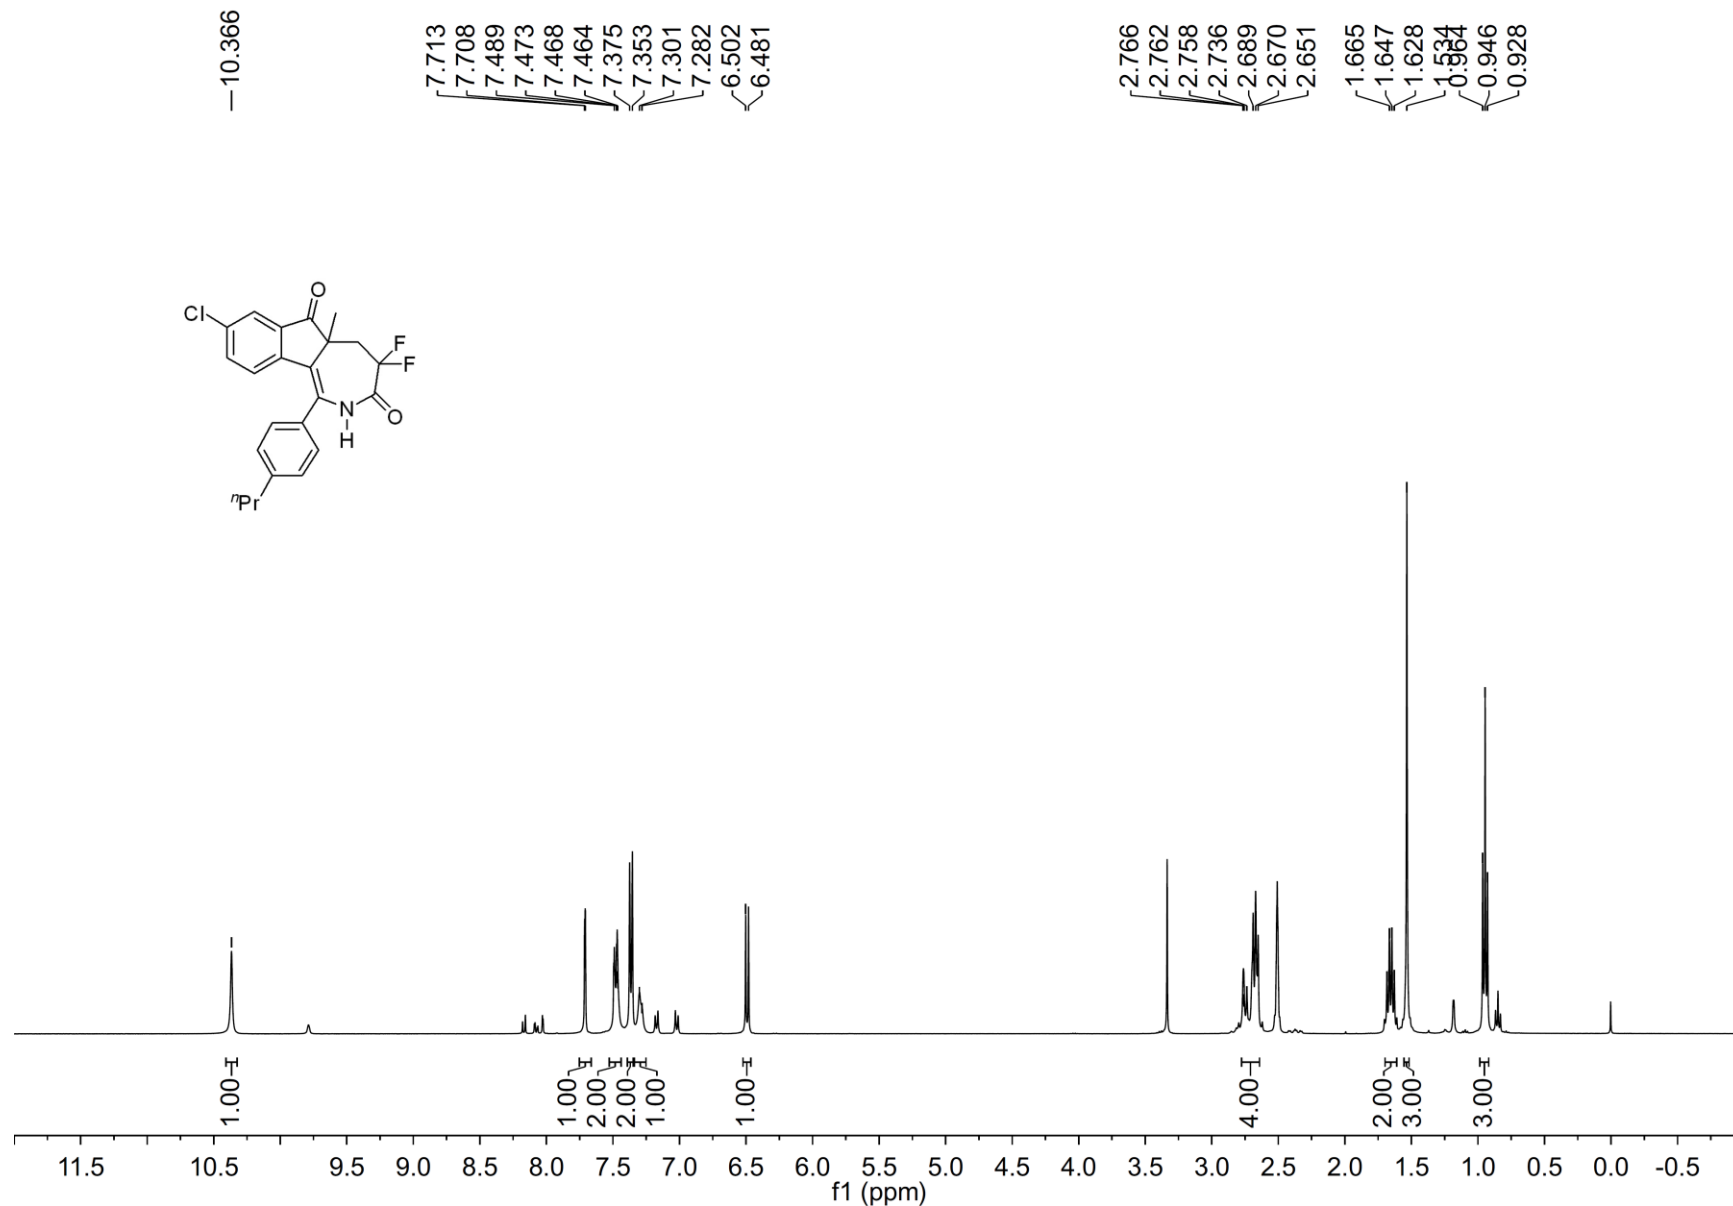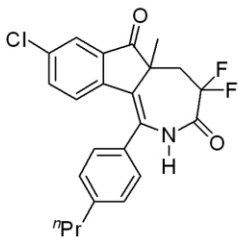

<sup>1</sup>H NMR Spectrum of Compound 3p

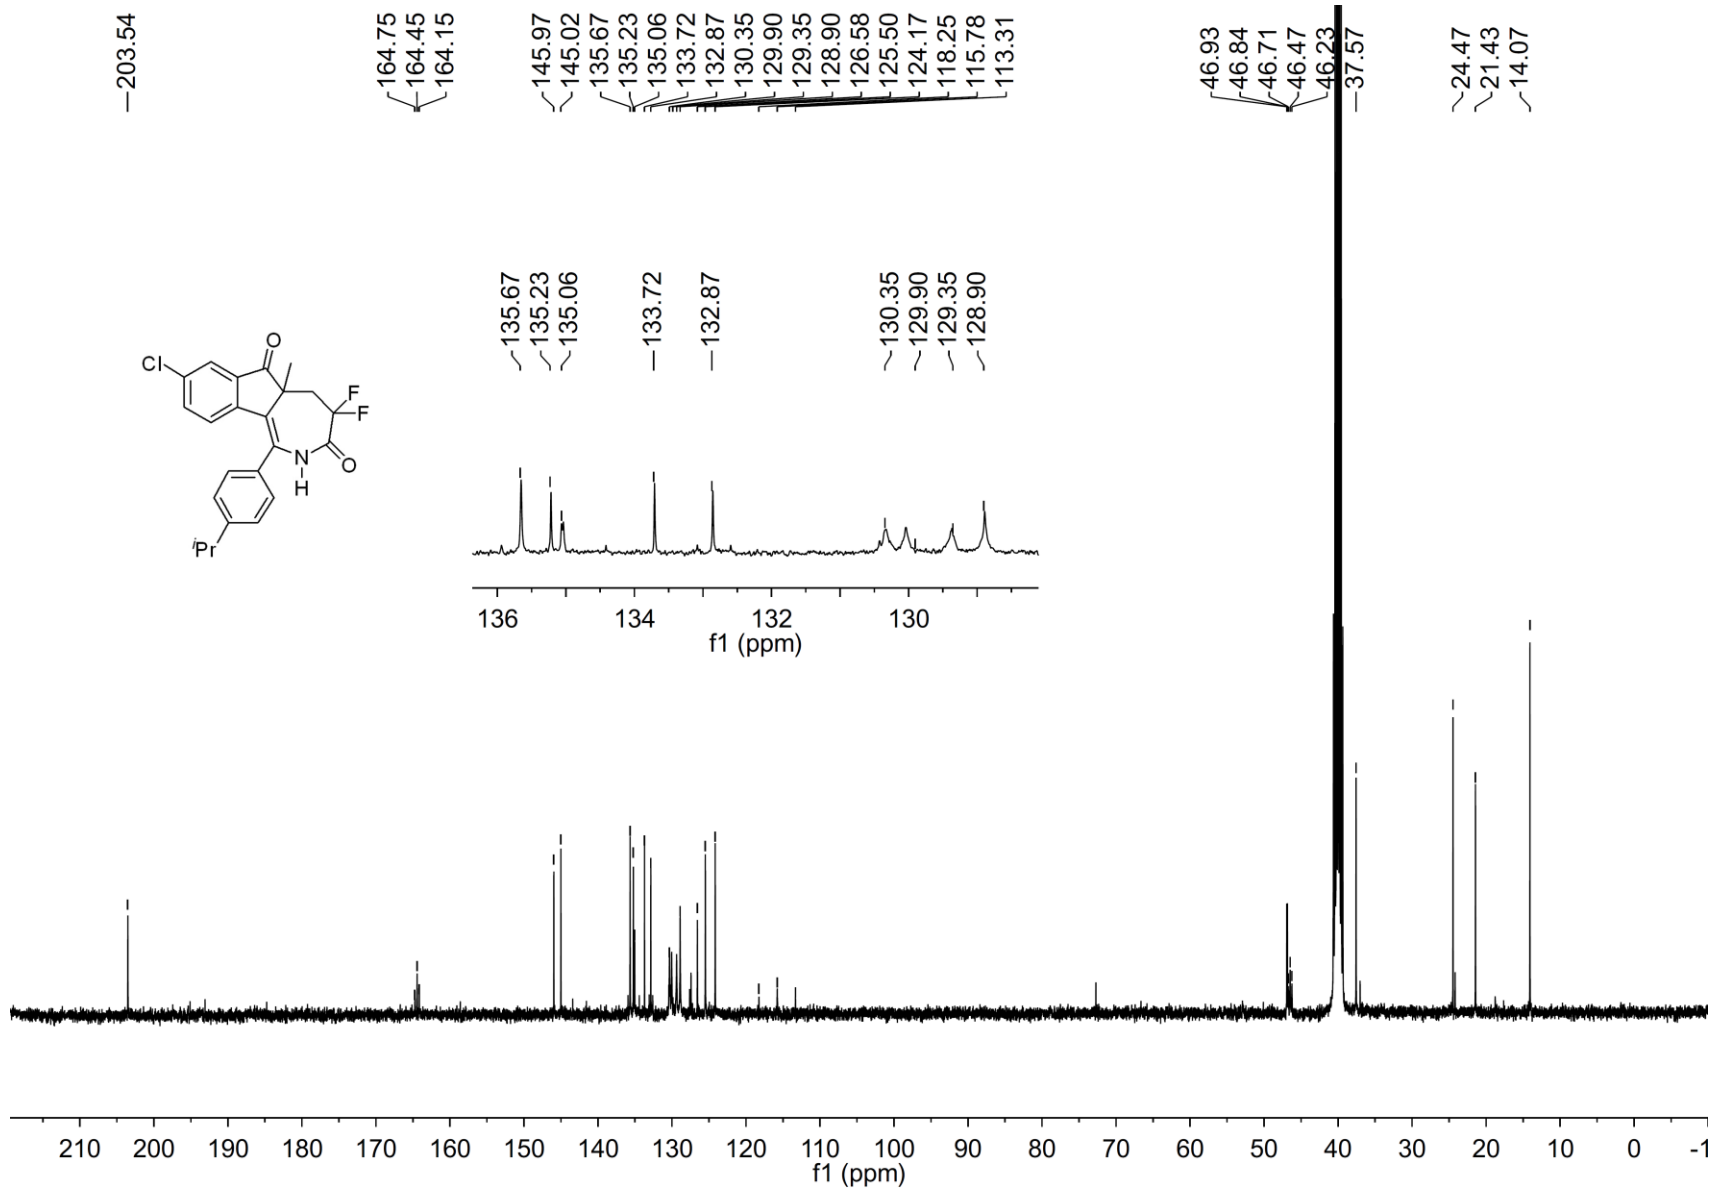

**<sup>13</sup>C NMR Spectrum of Compound 3p**

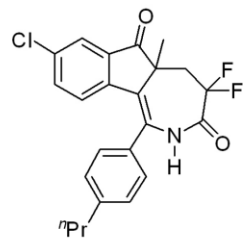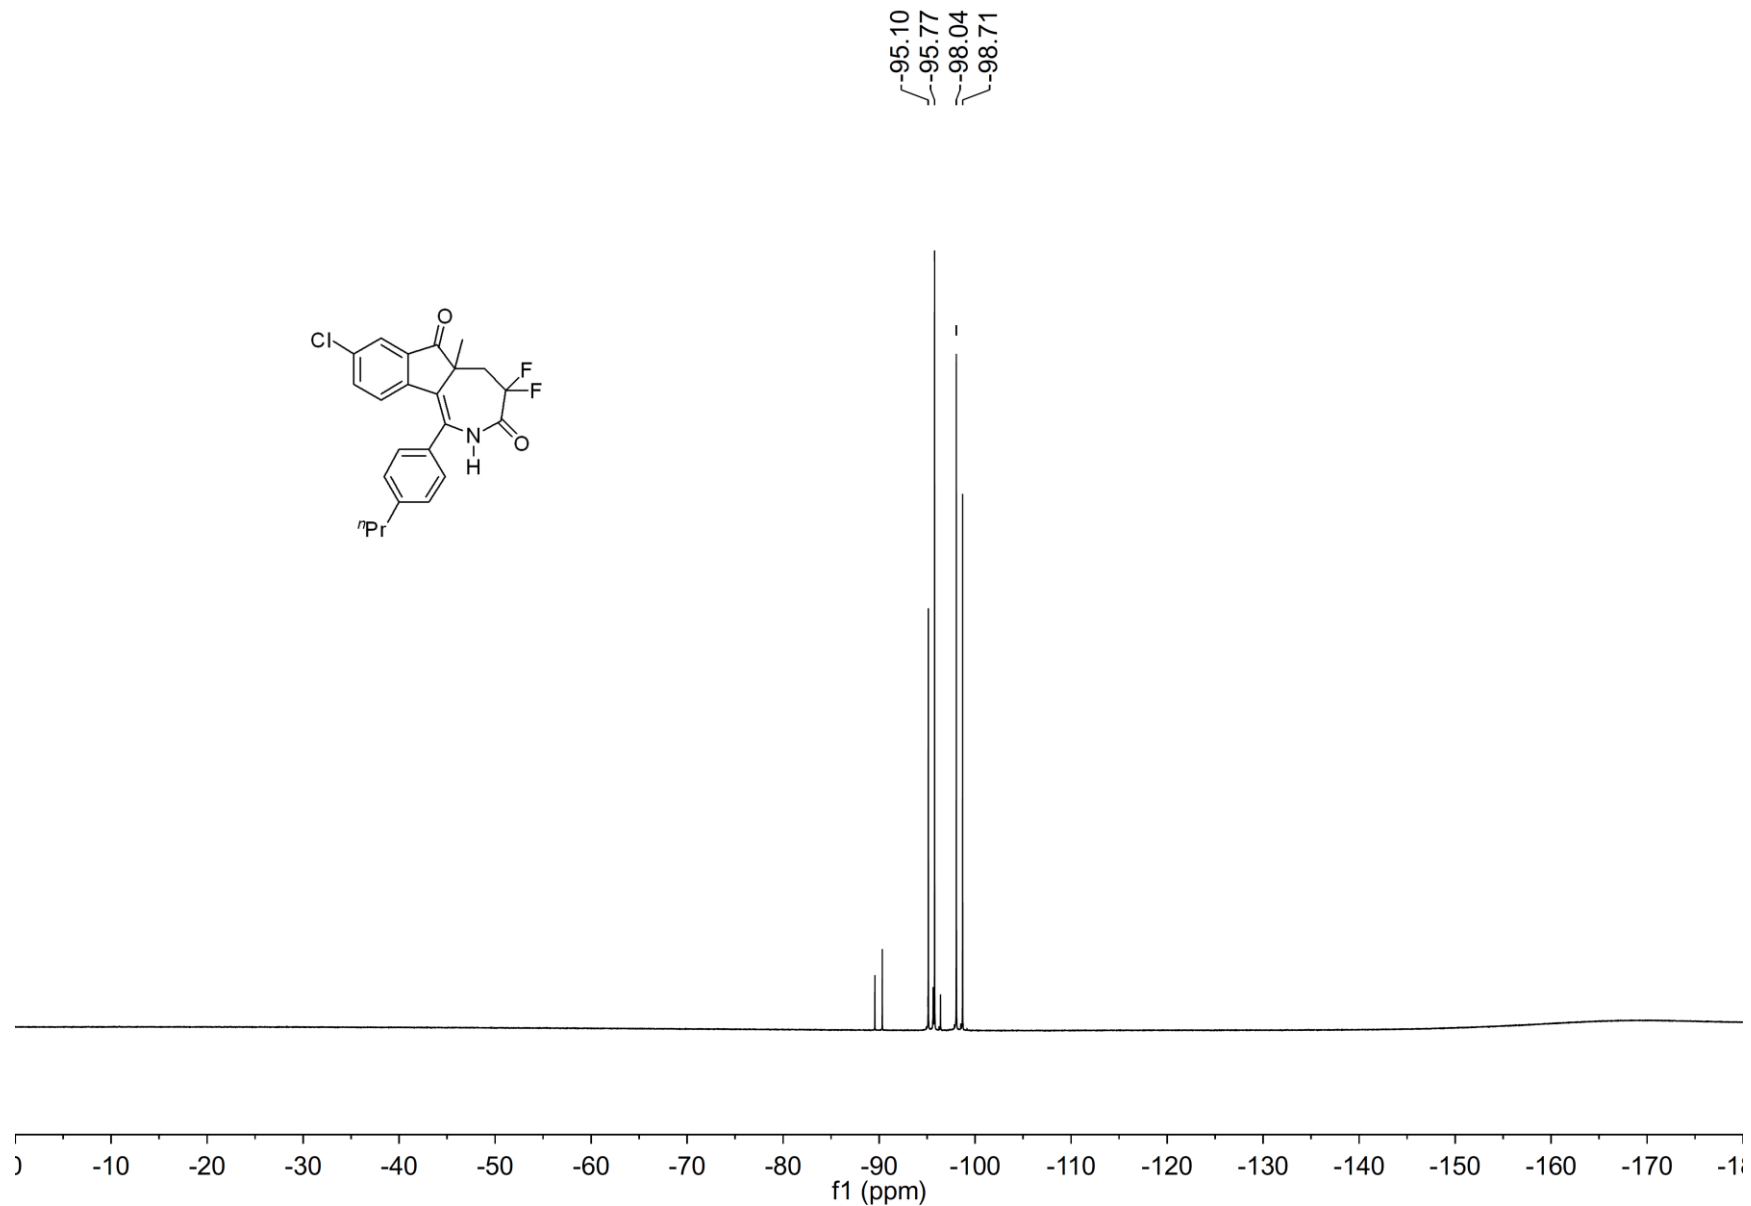

$^{19}\text{F}$  NMR Spectrum of Compound 3p

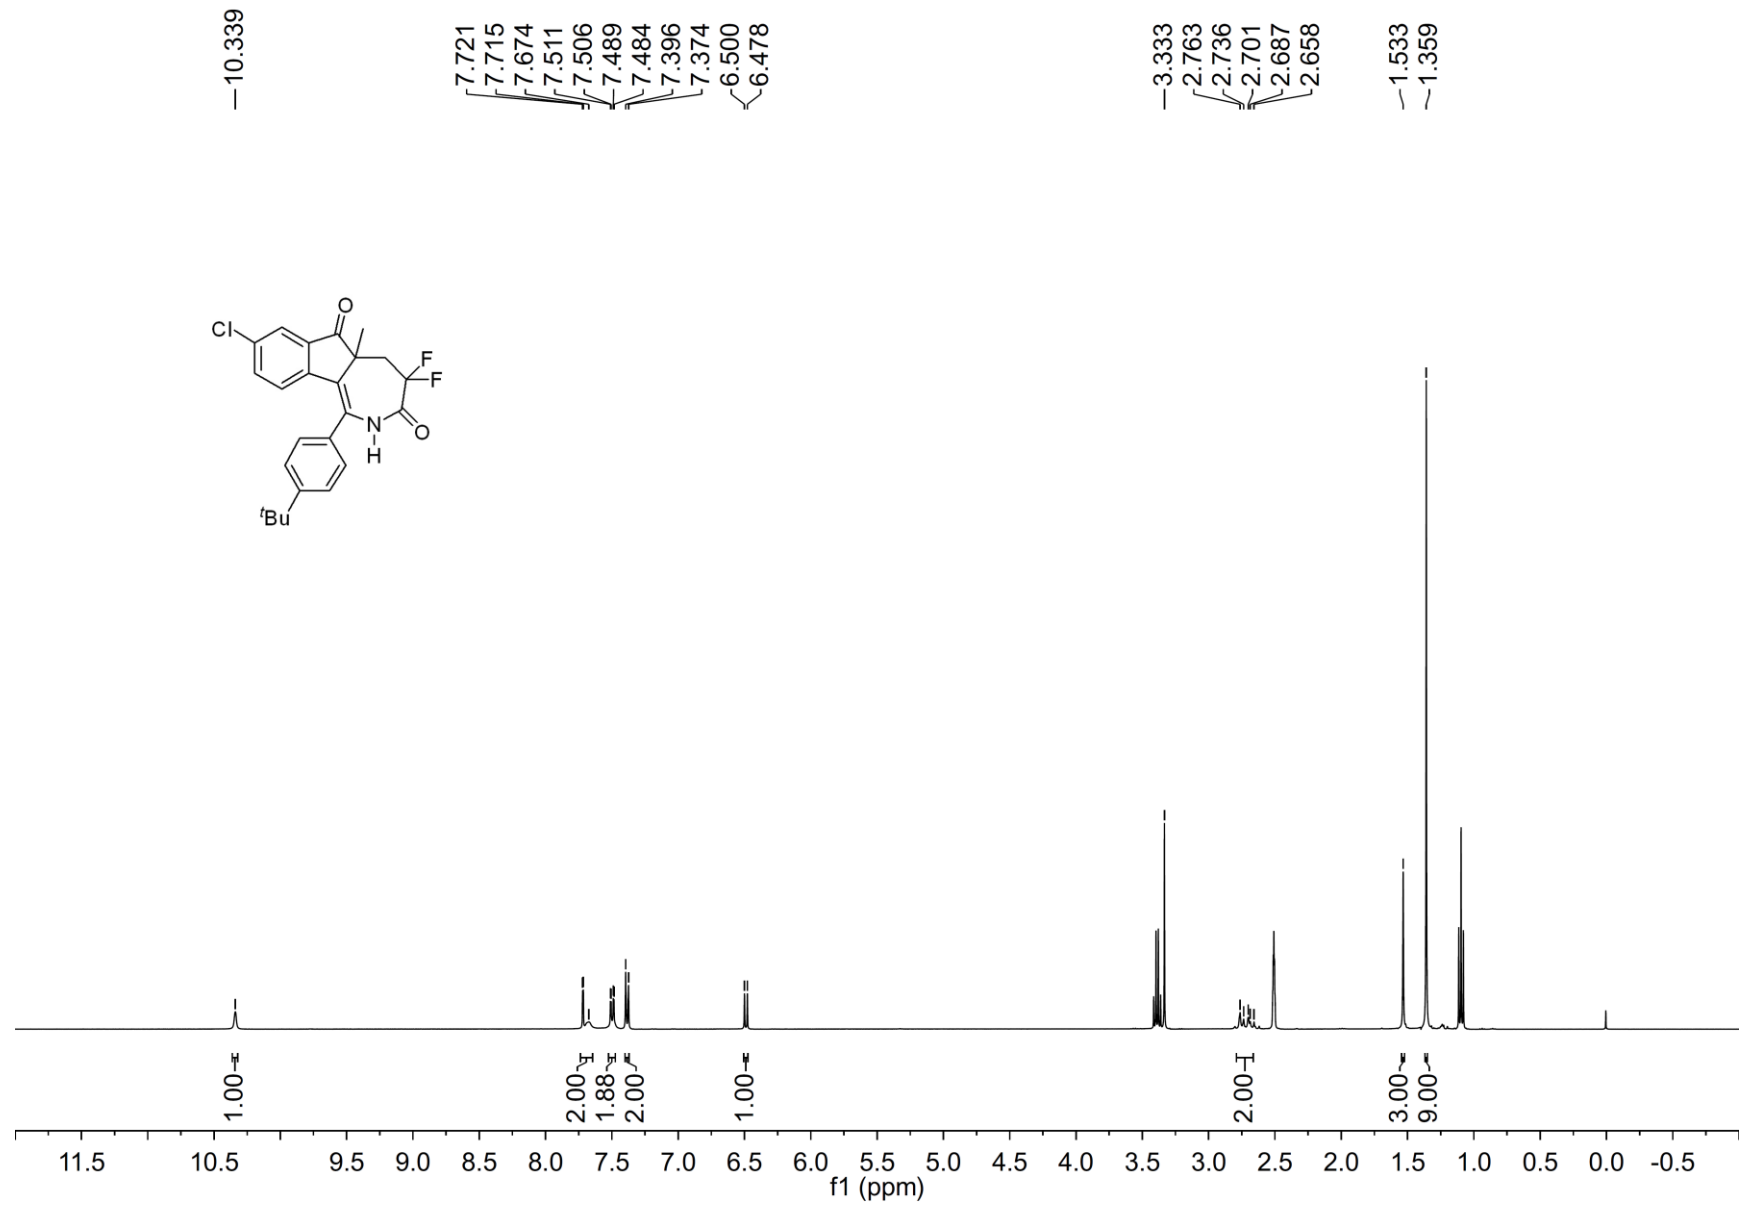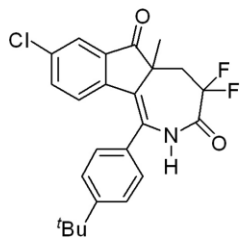

<sup>1</sup>H NMR Spectrum of Compound 3q

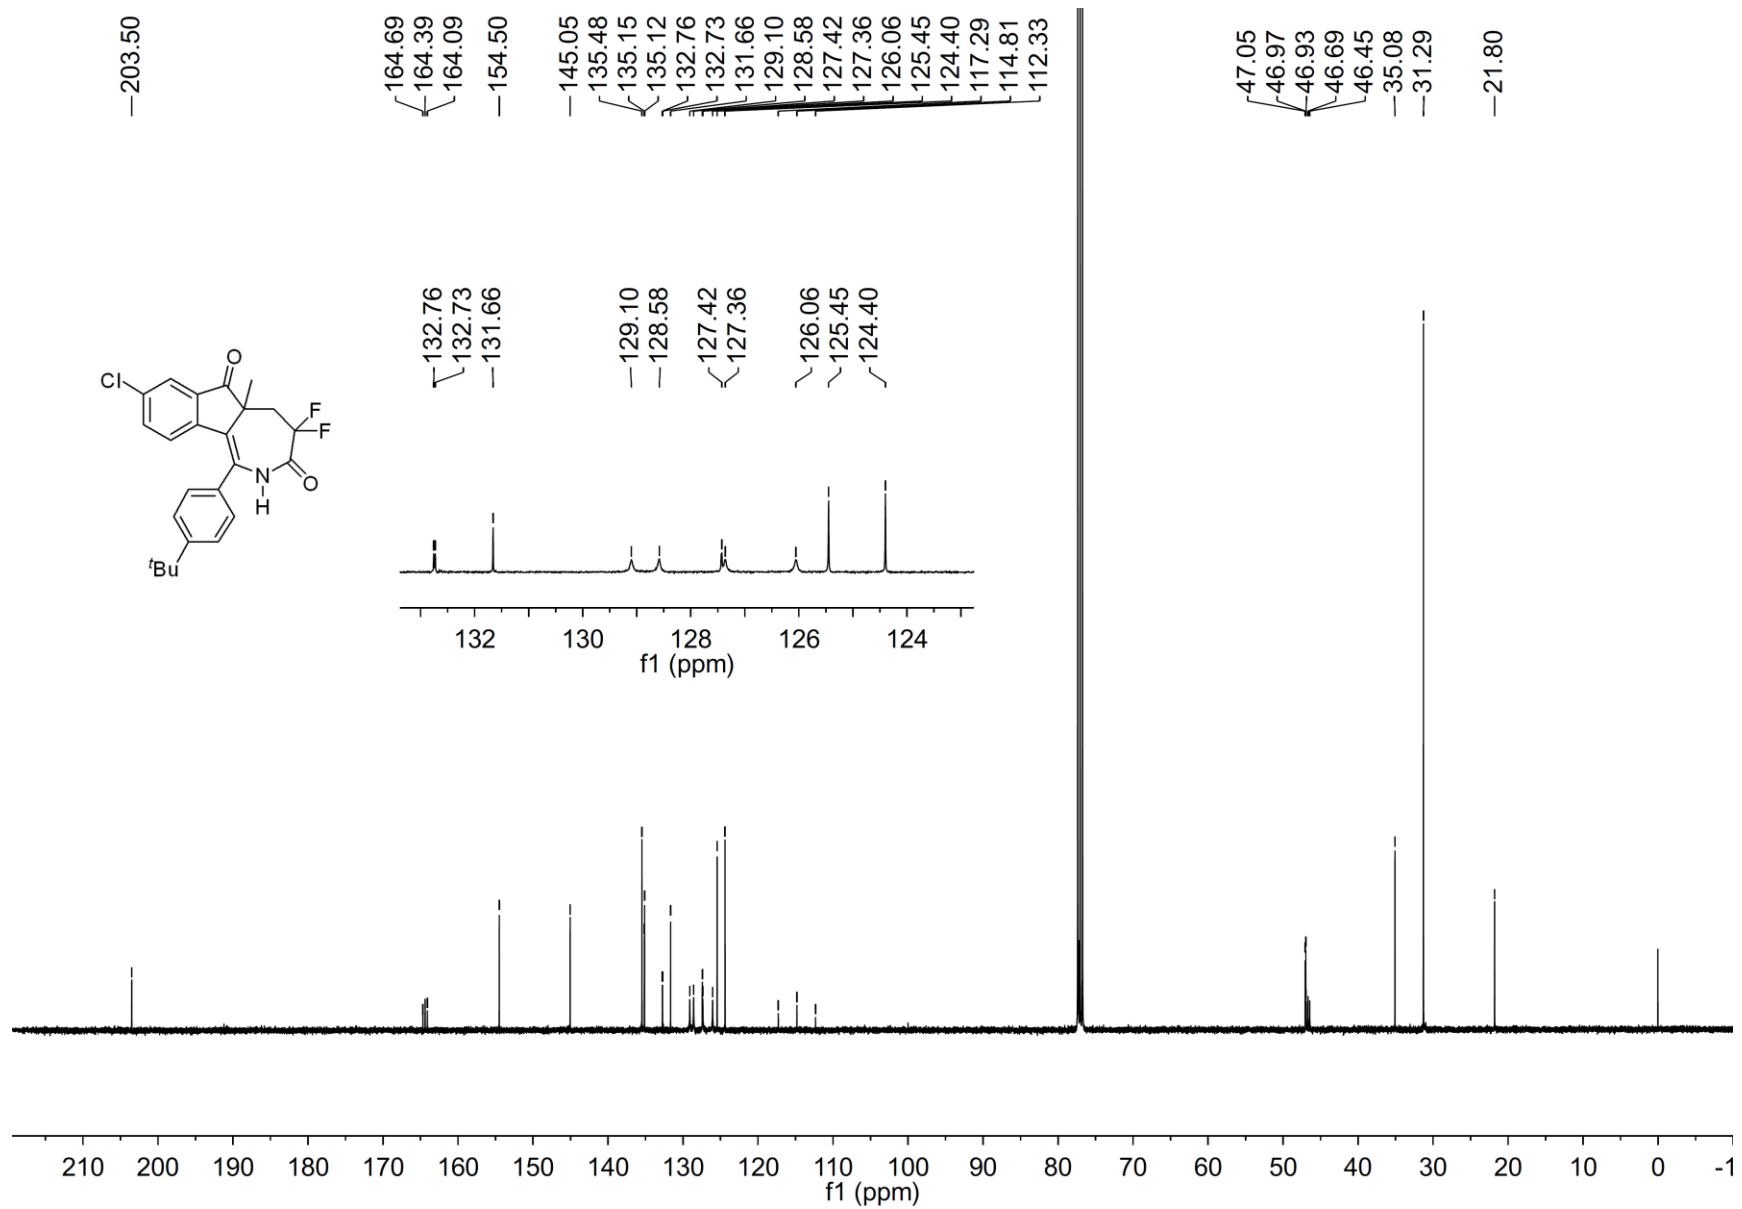

<sup>13</sup>C NMR Spectrum of Compound 3q

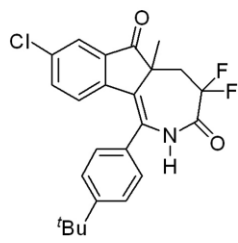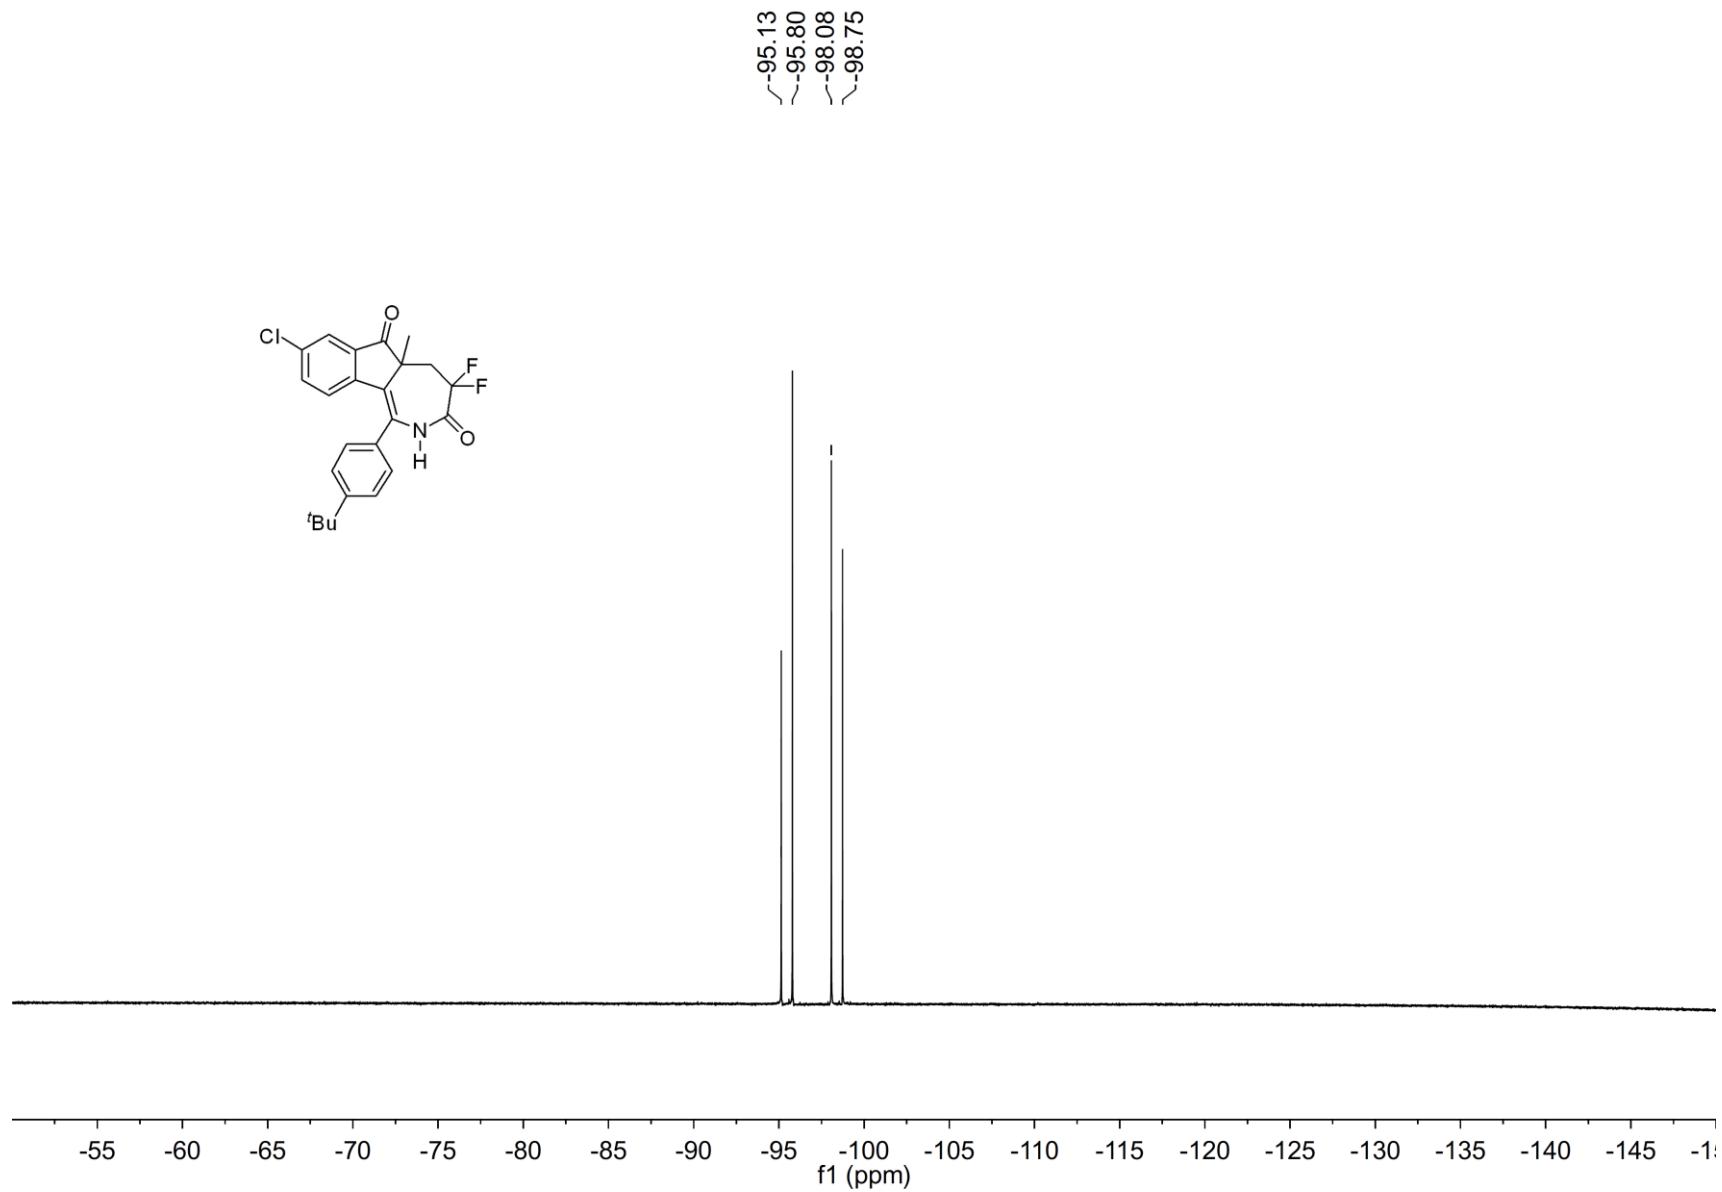

$^{19}\text{F}$  NMR Spectrum of Compound 3q

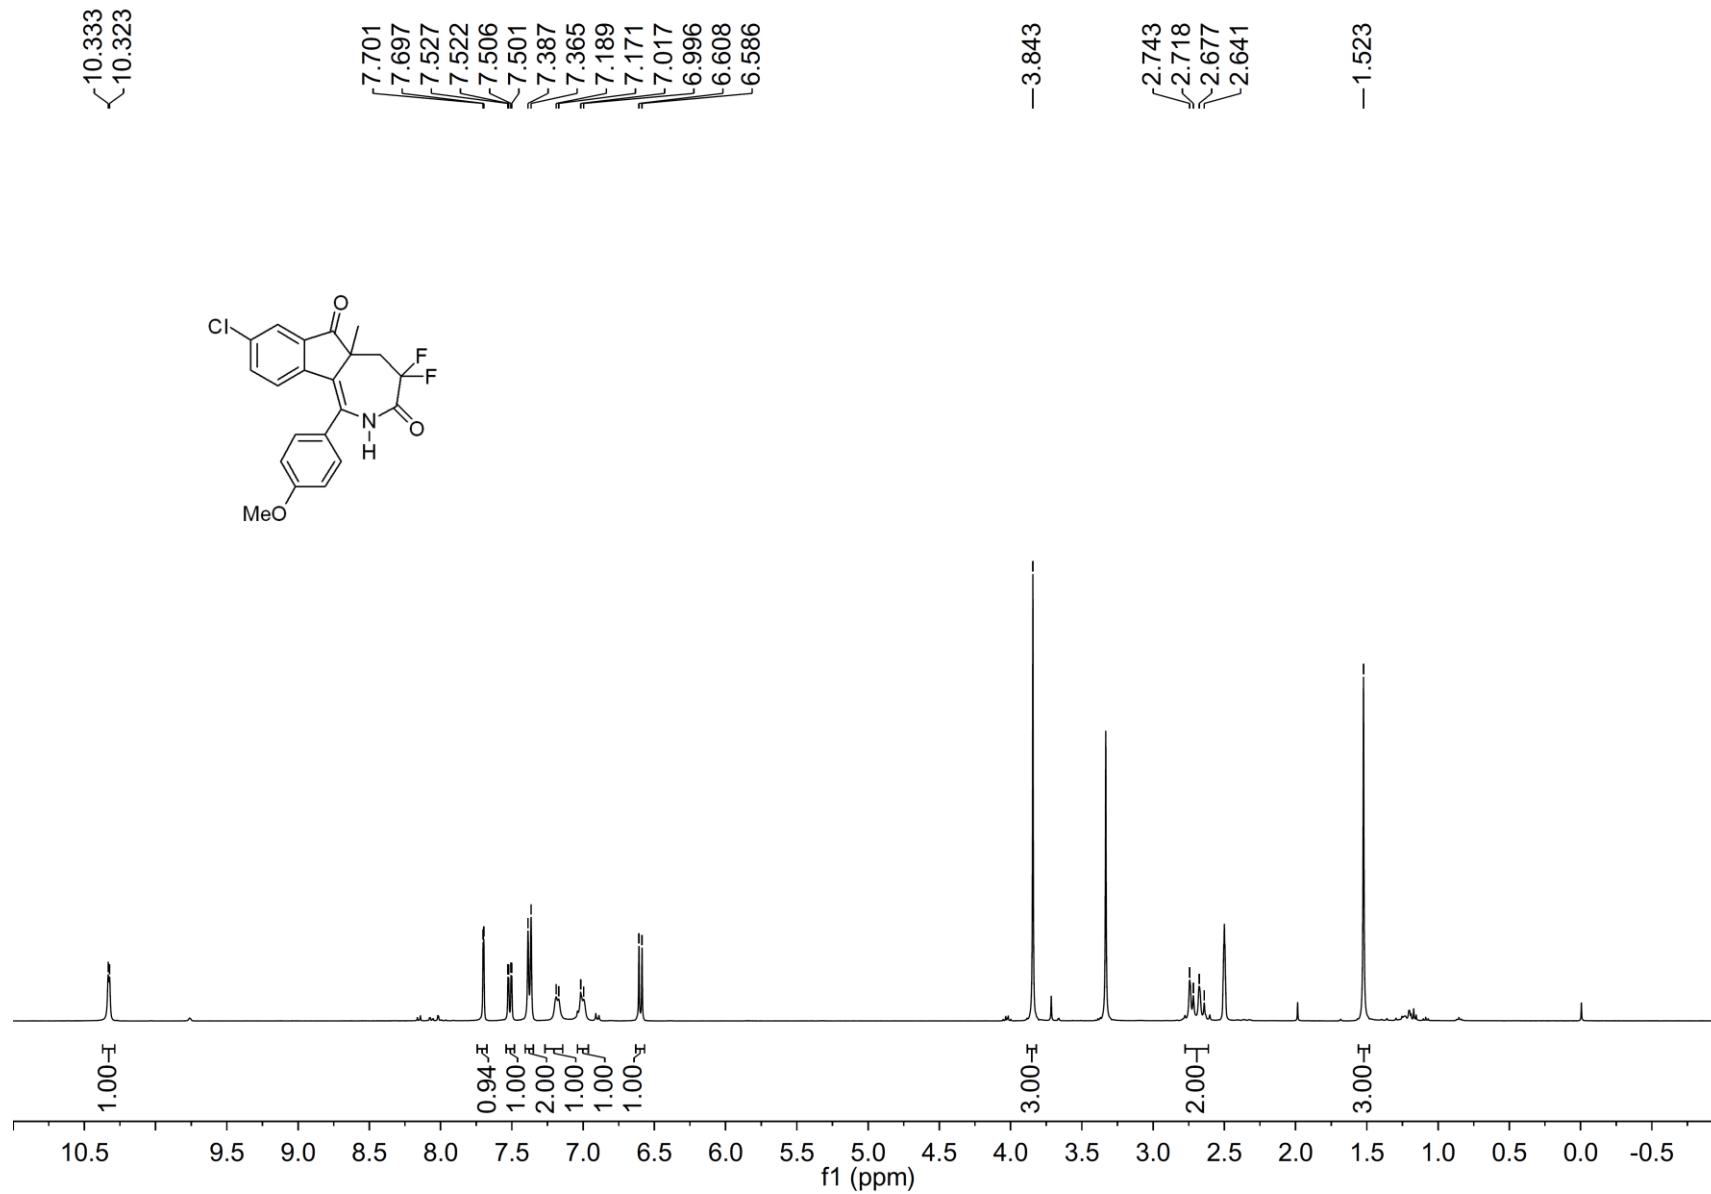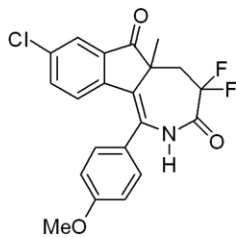

<sup>1</sup>H NMR Spectrum of Compound 3r



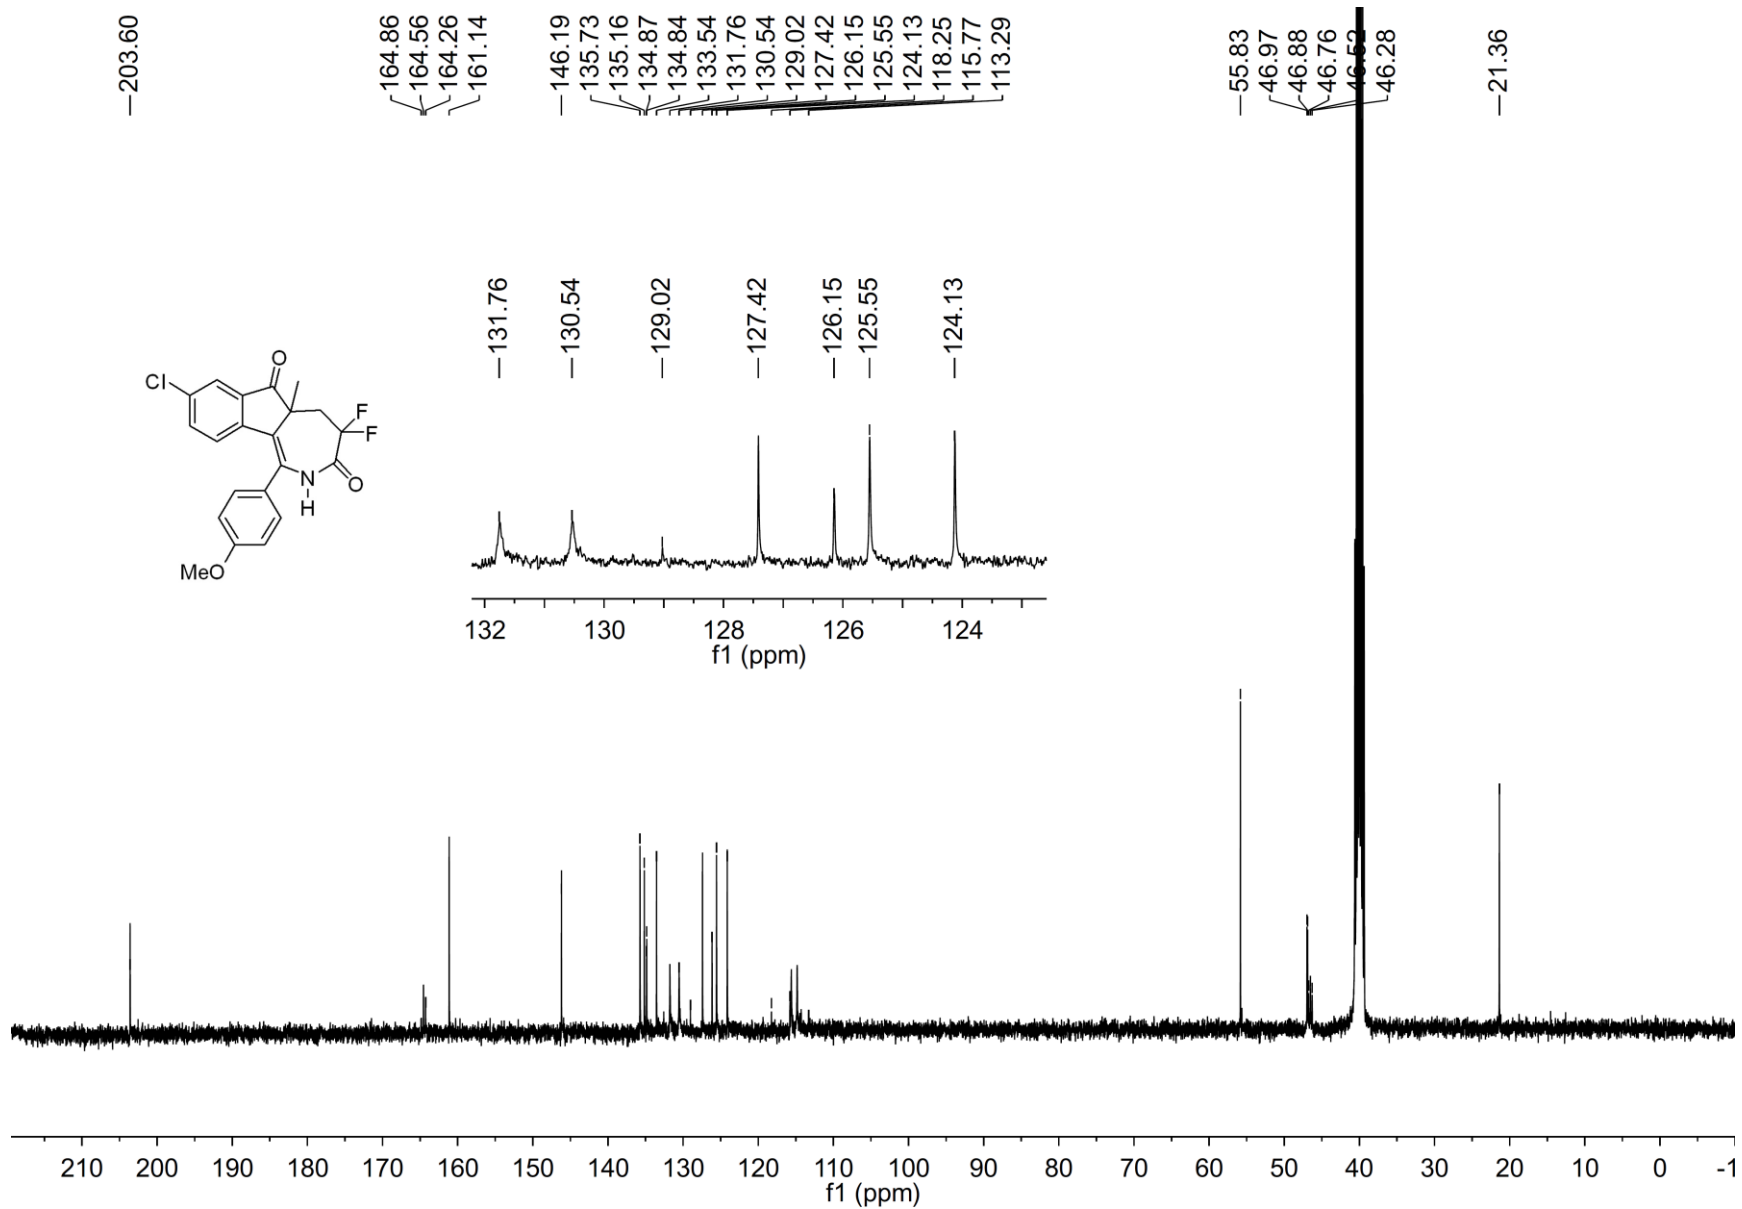

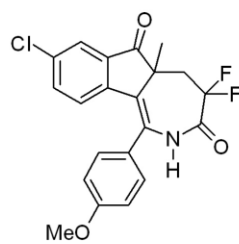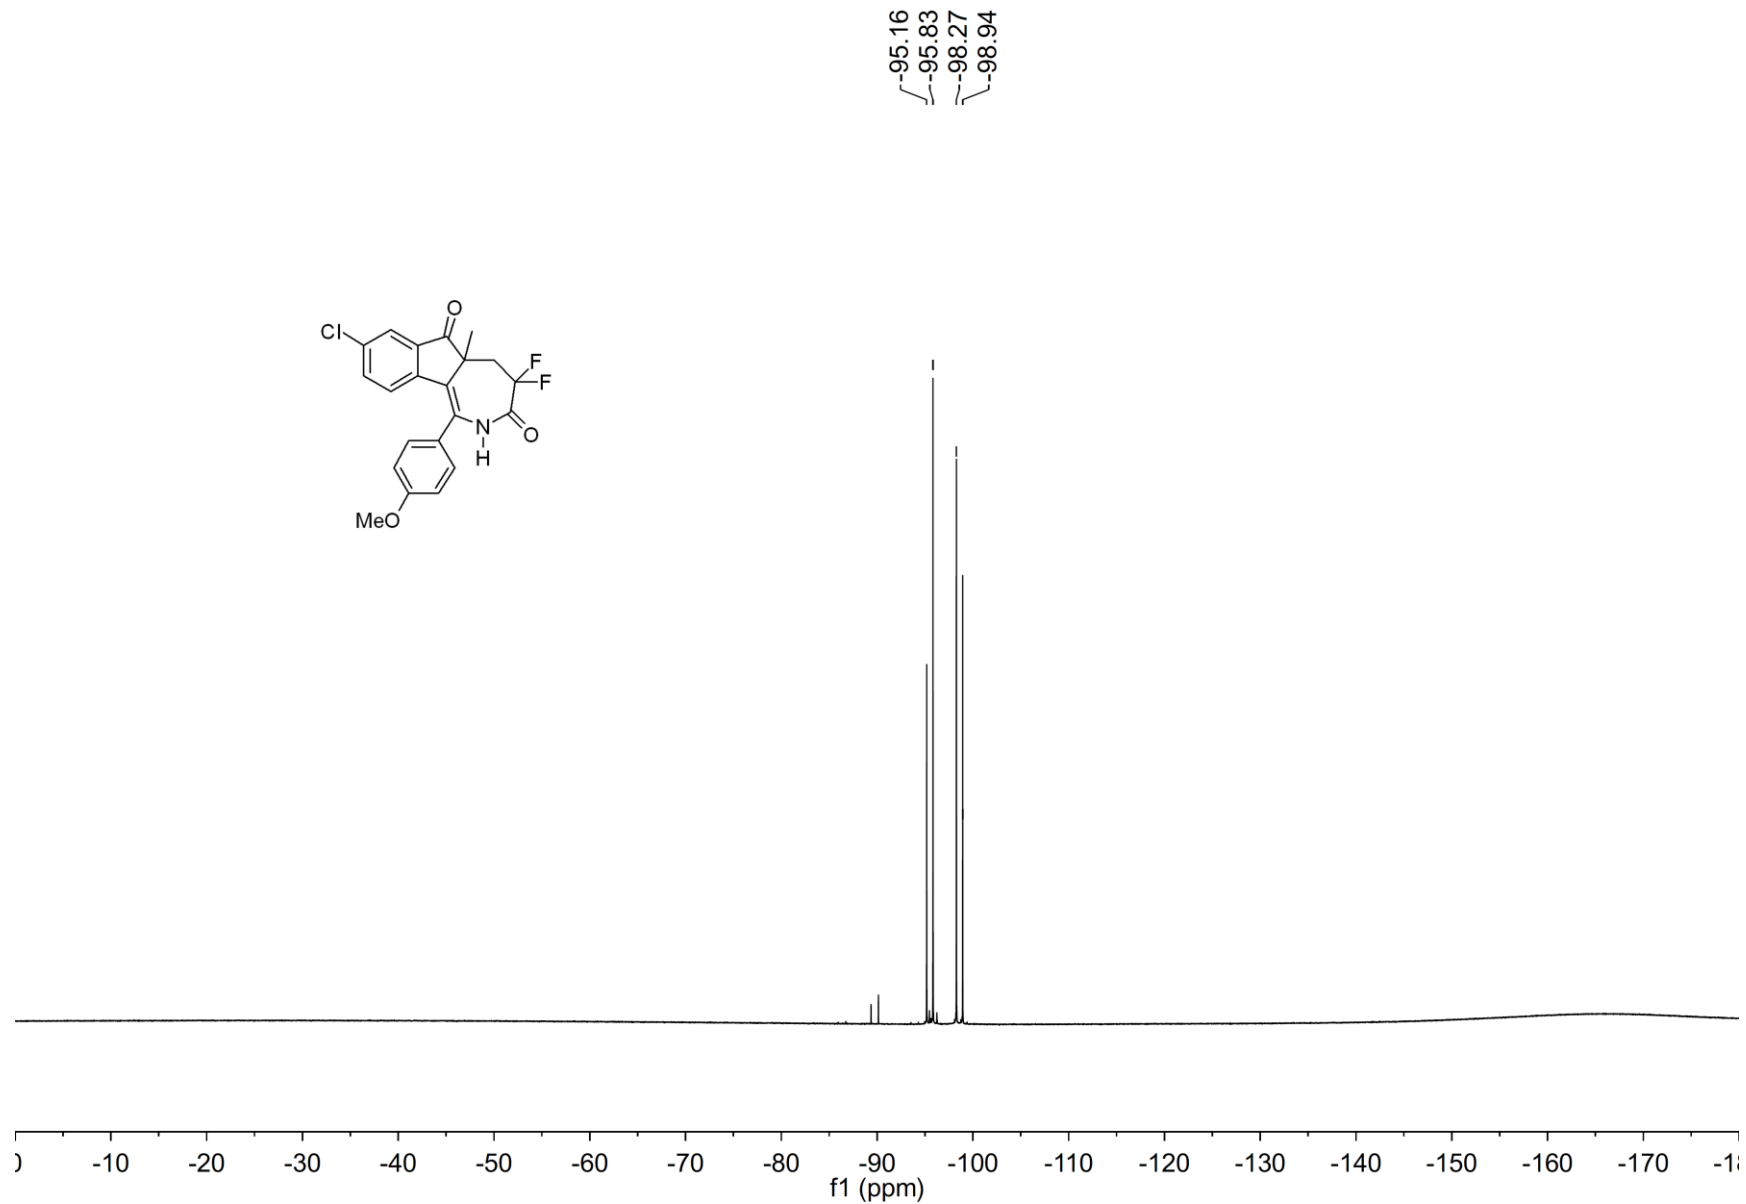

$^{19}\text{F}$  NMR Spectrum of Compound 3r

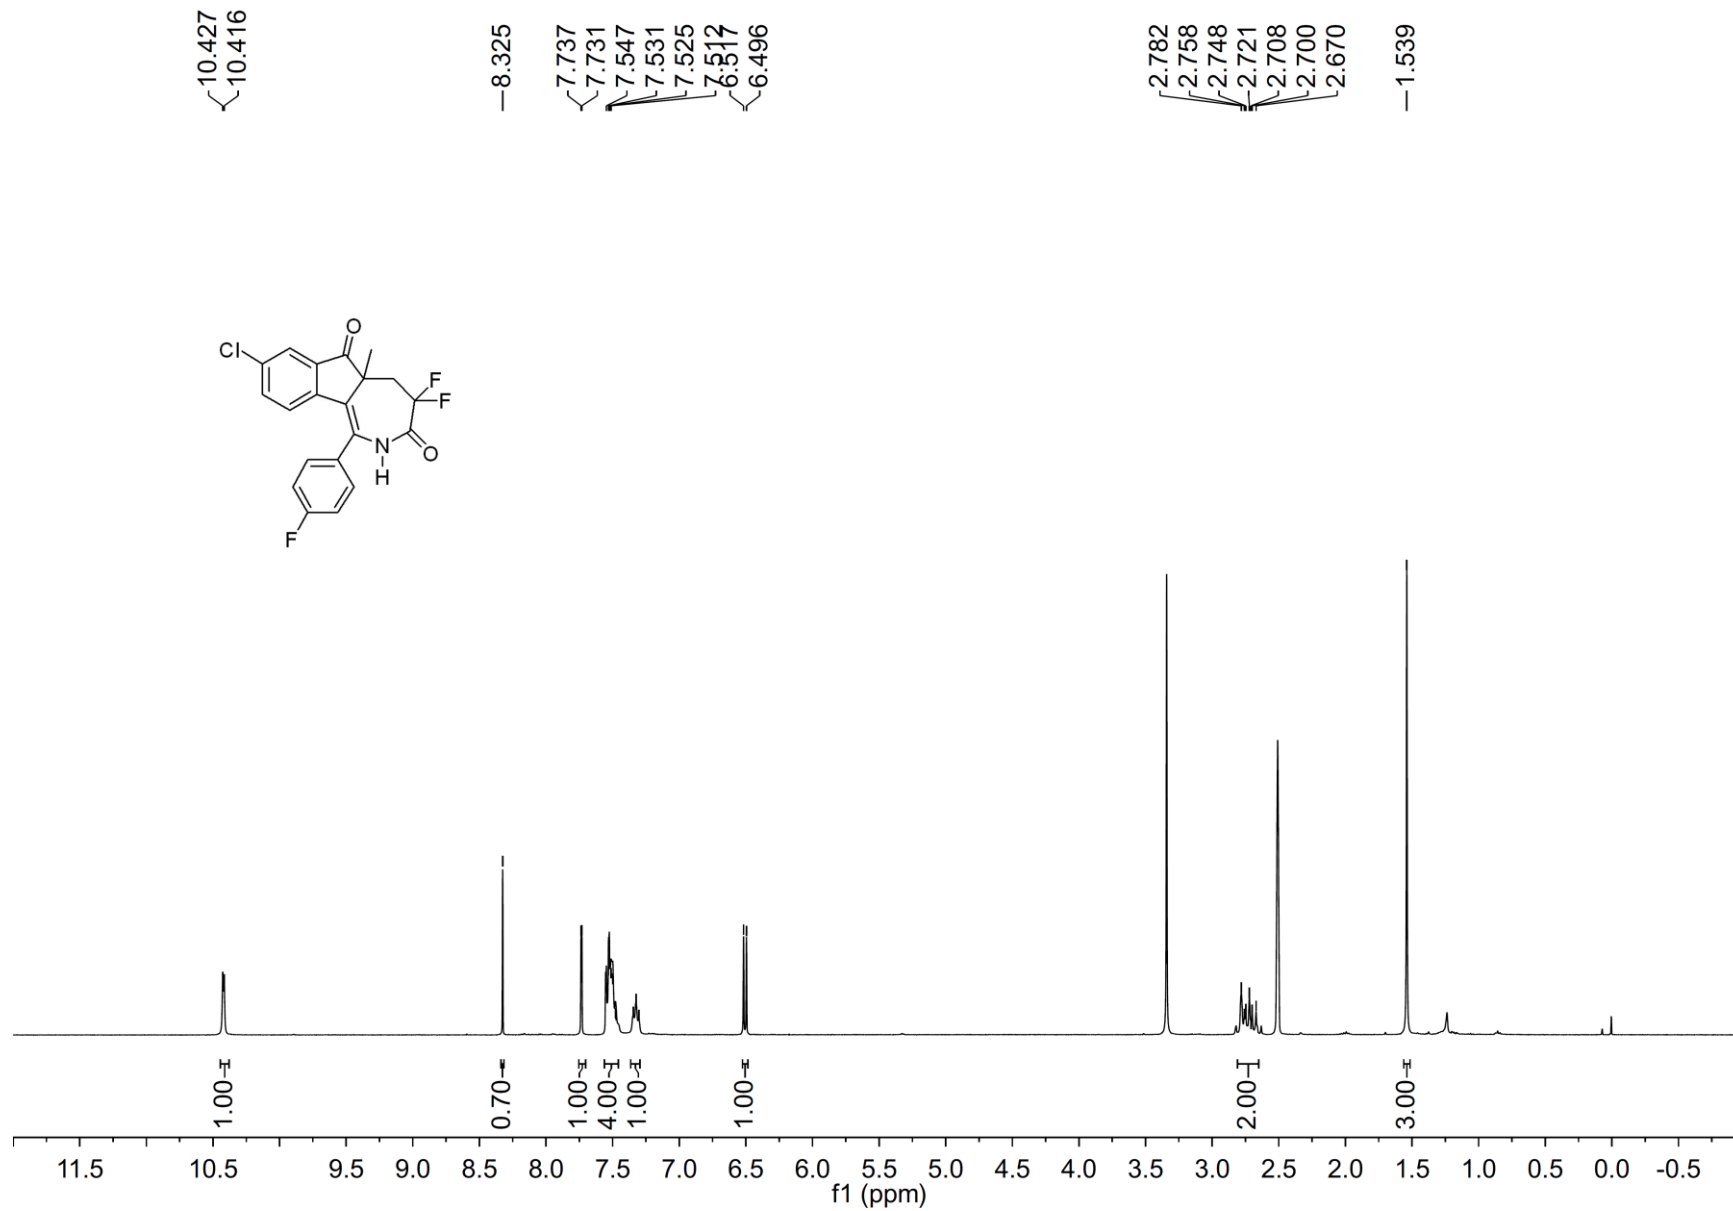

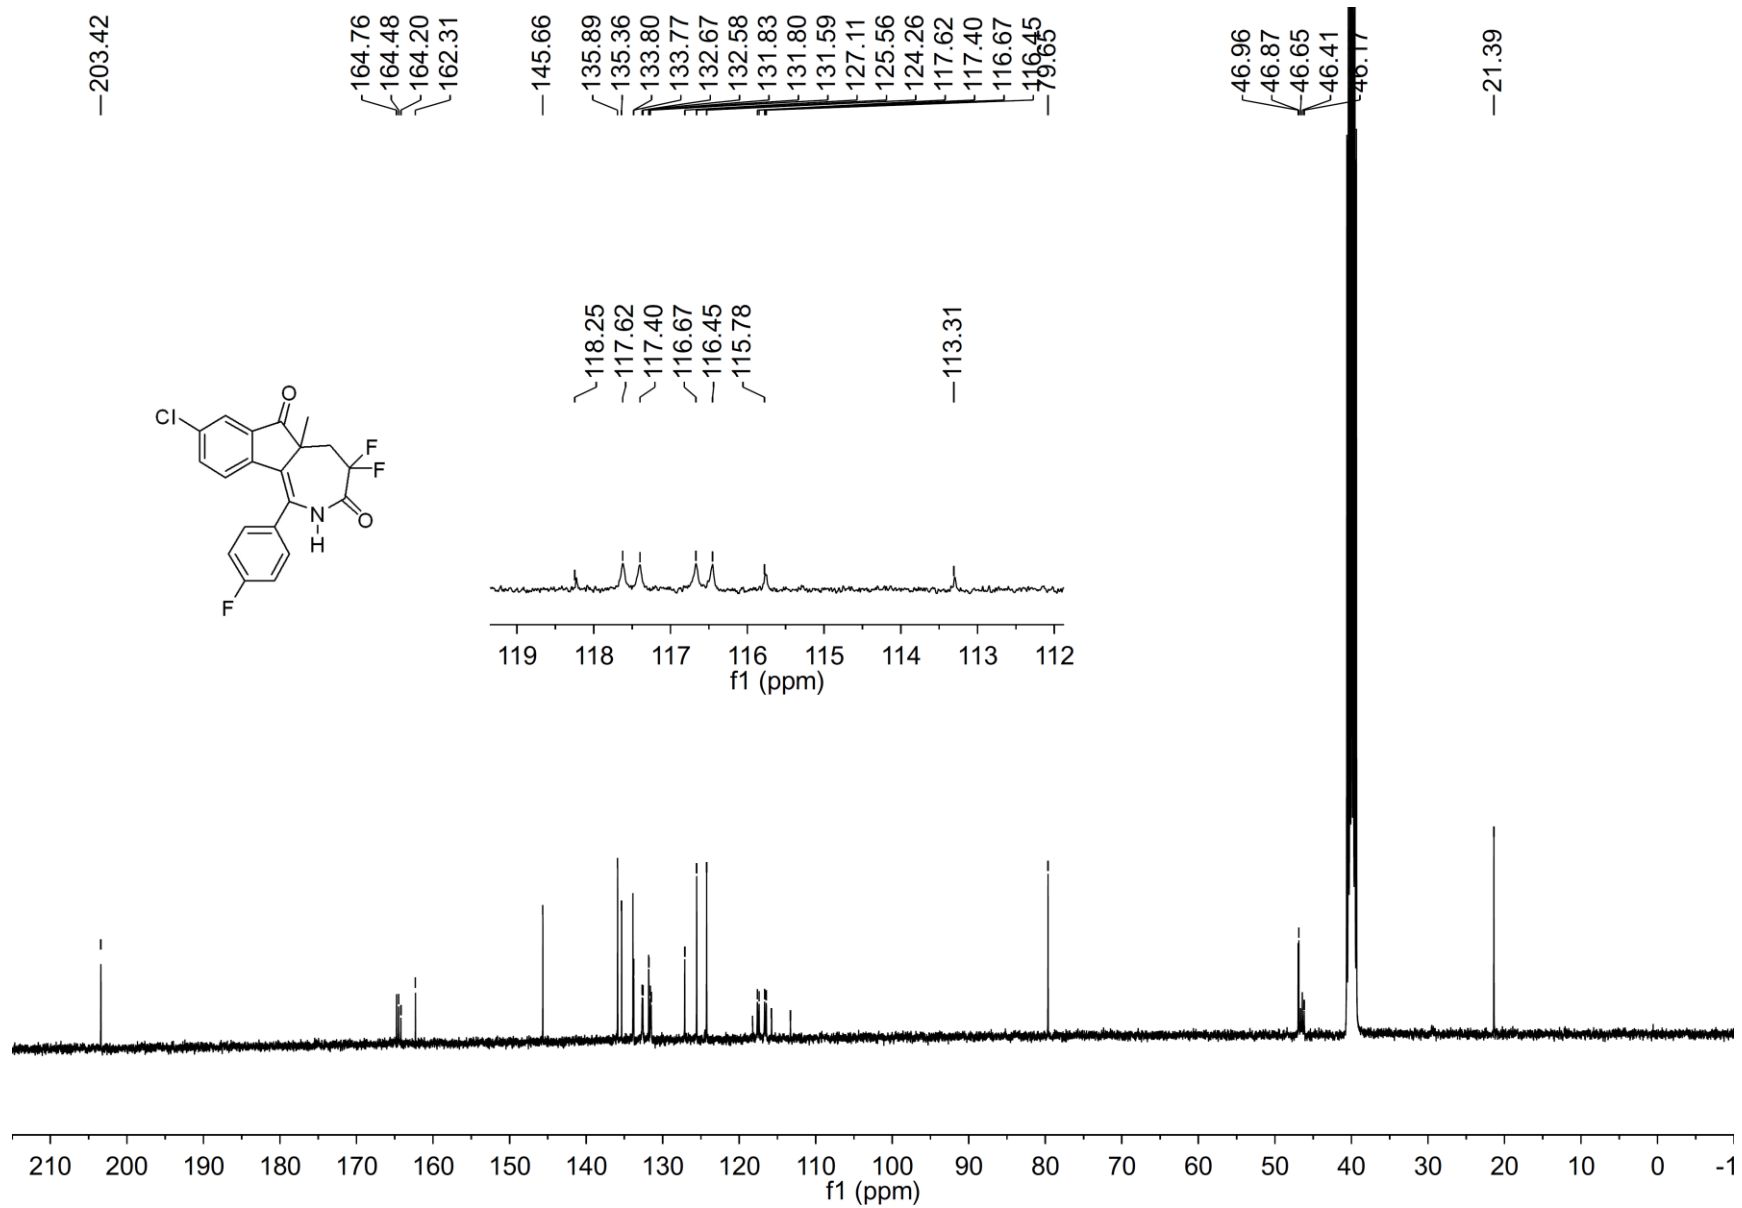

**<sup>13</sup>C NMR Spectrum of Compound 3s**

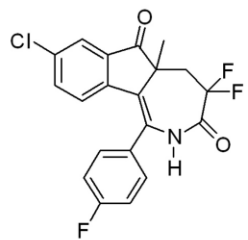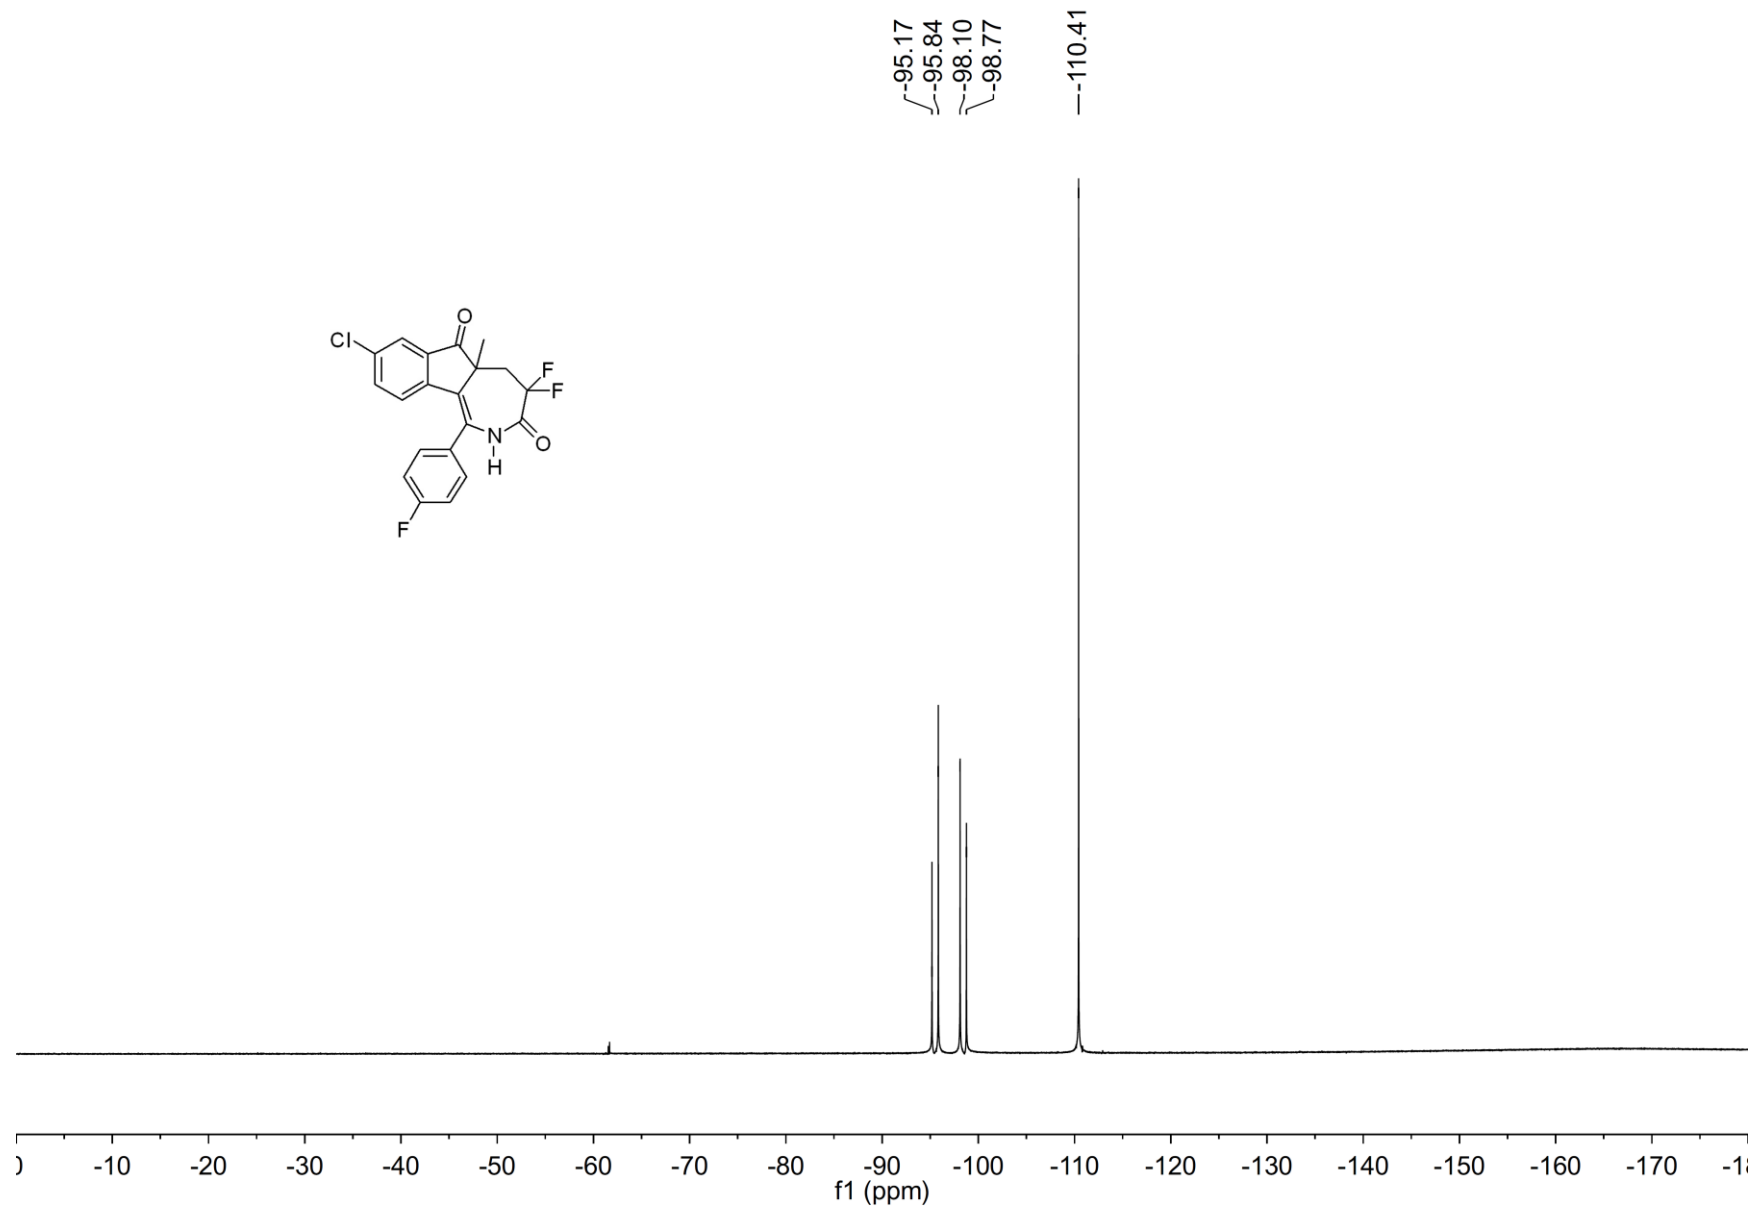

$^{19}\text{F}$  NMR Spectrum of Compound 3s

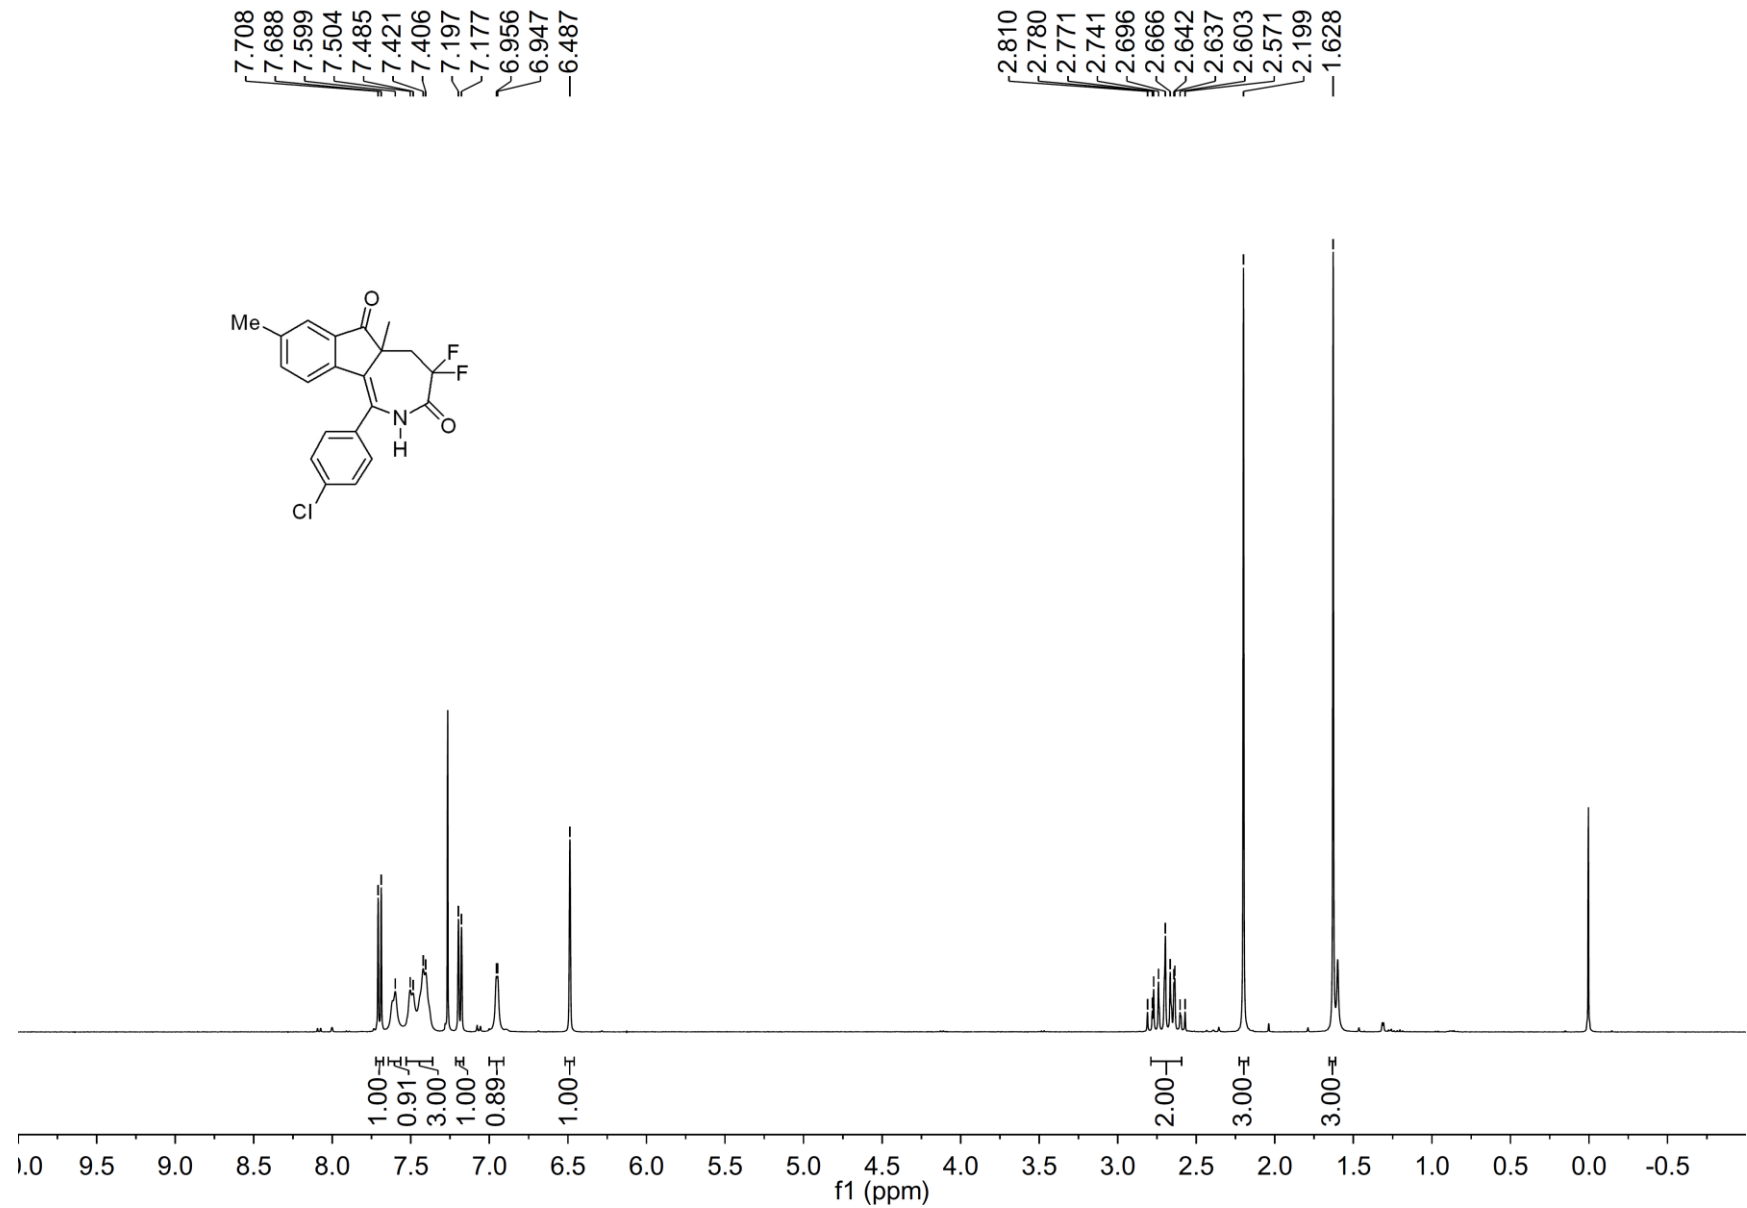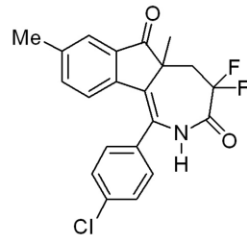

**<sup>1</sup>H NMR Spectrum of Compound 3t**

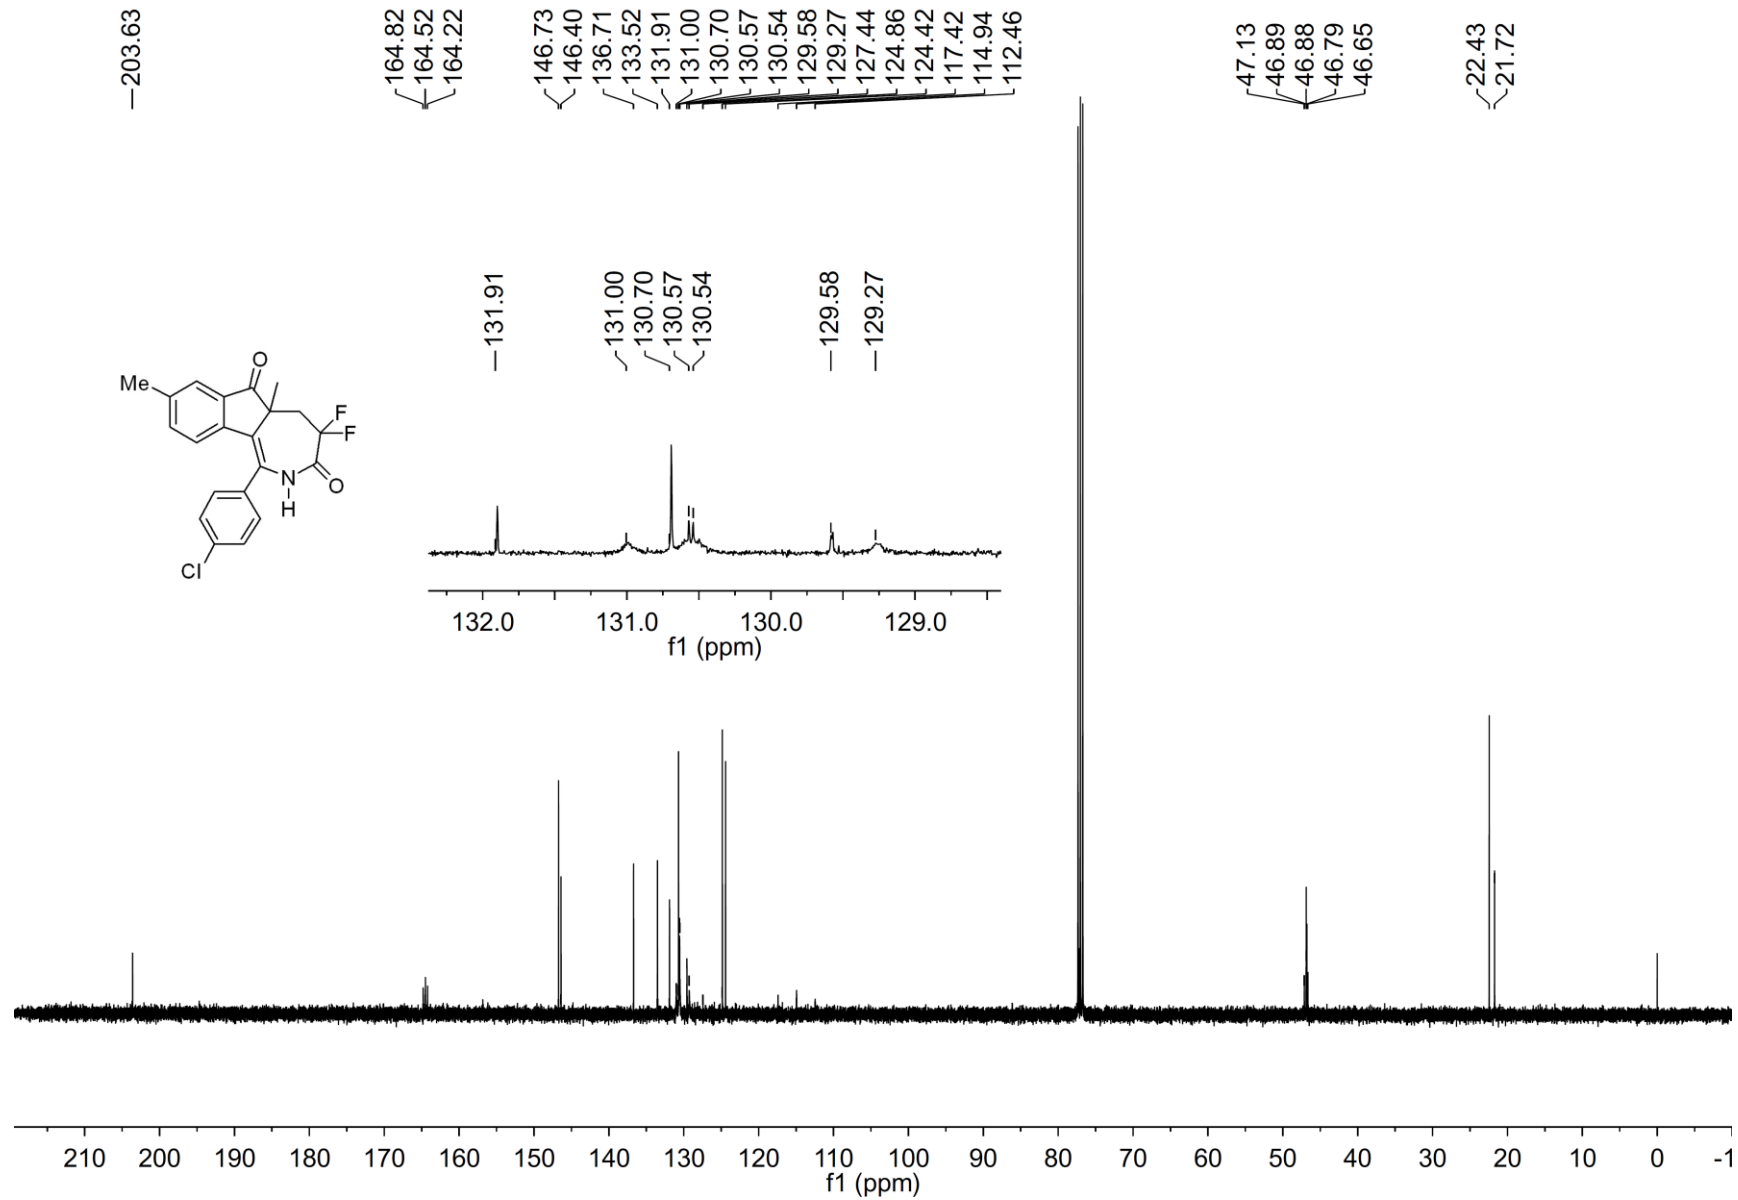

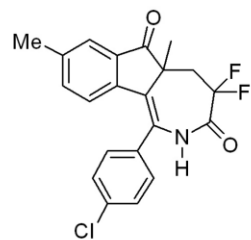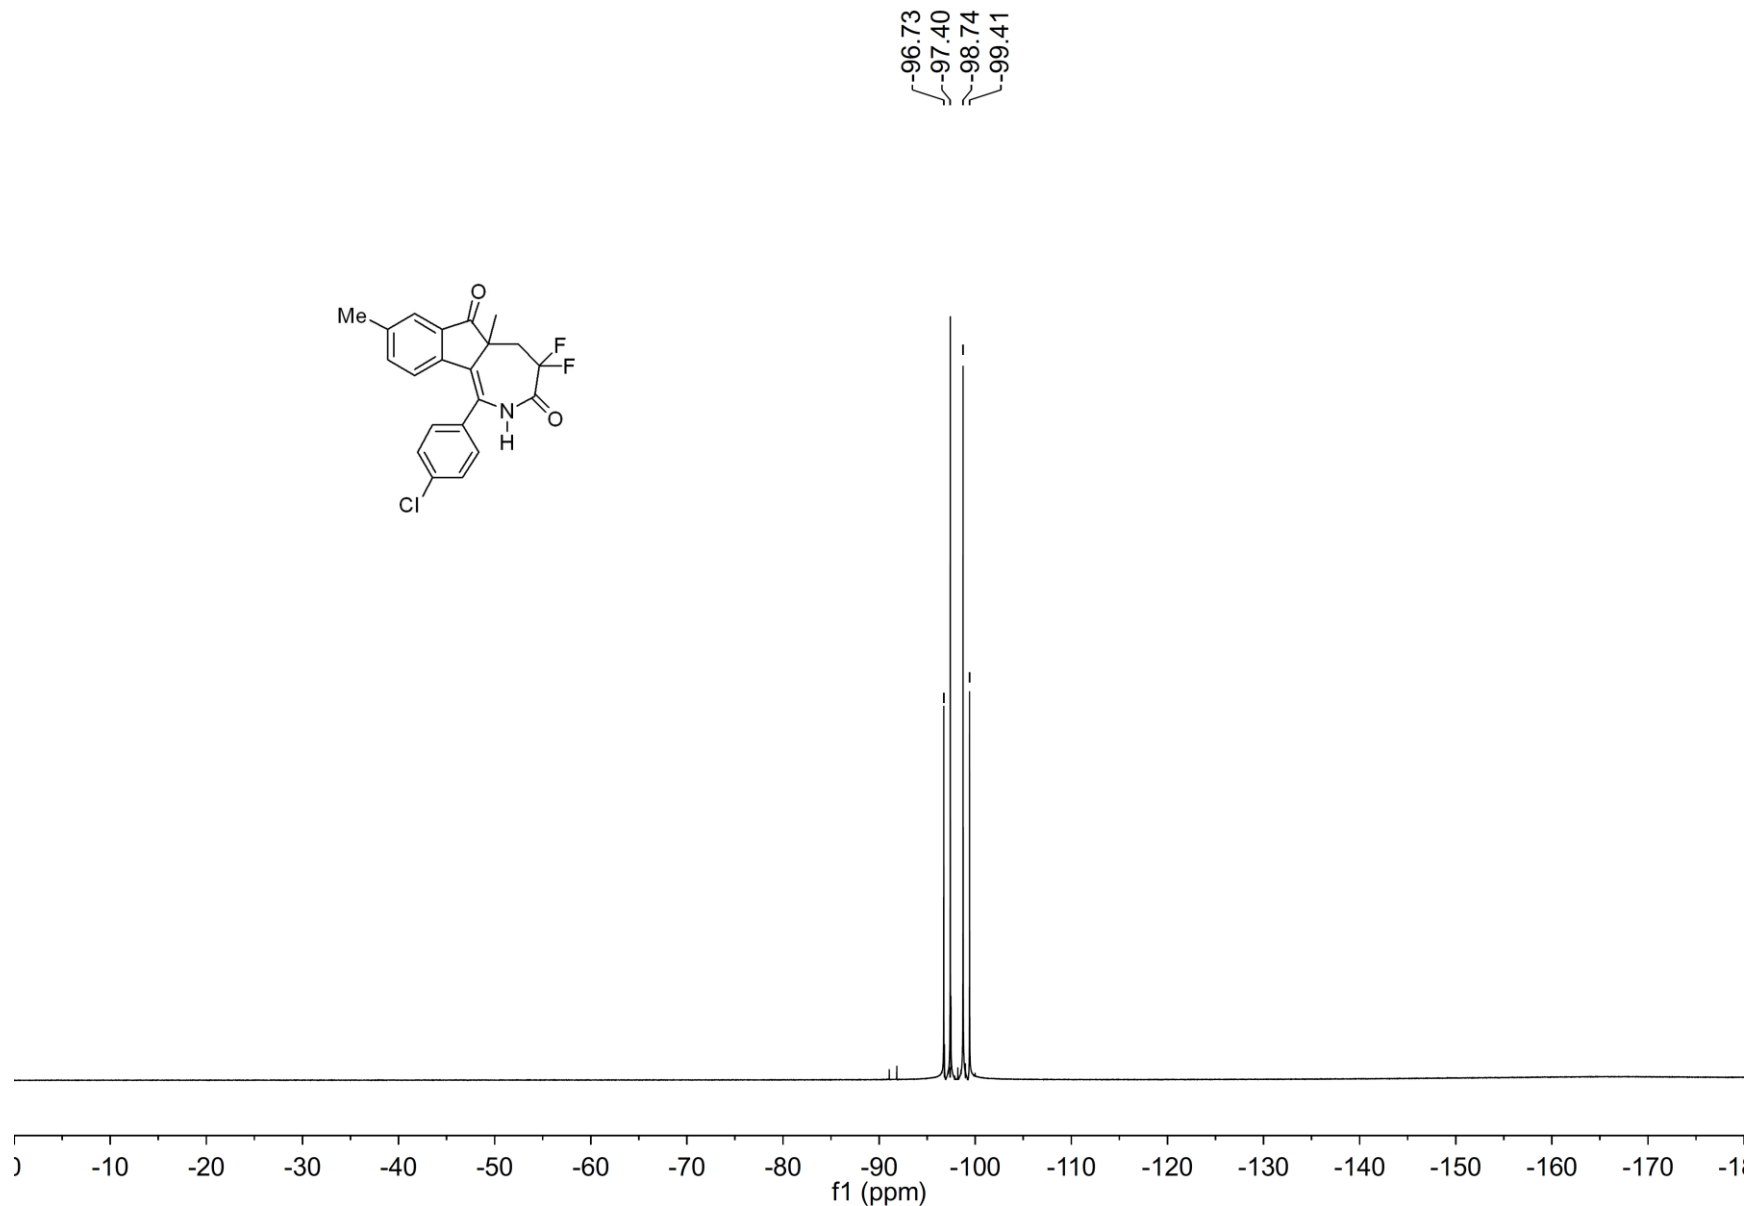

<sup>19</sup>F NMR Spectrum of Compound 3t



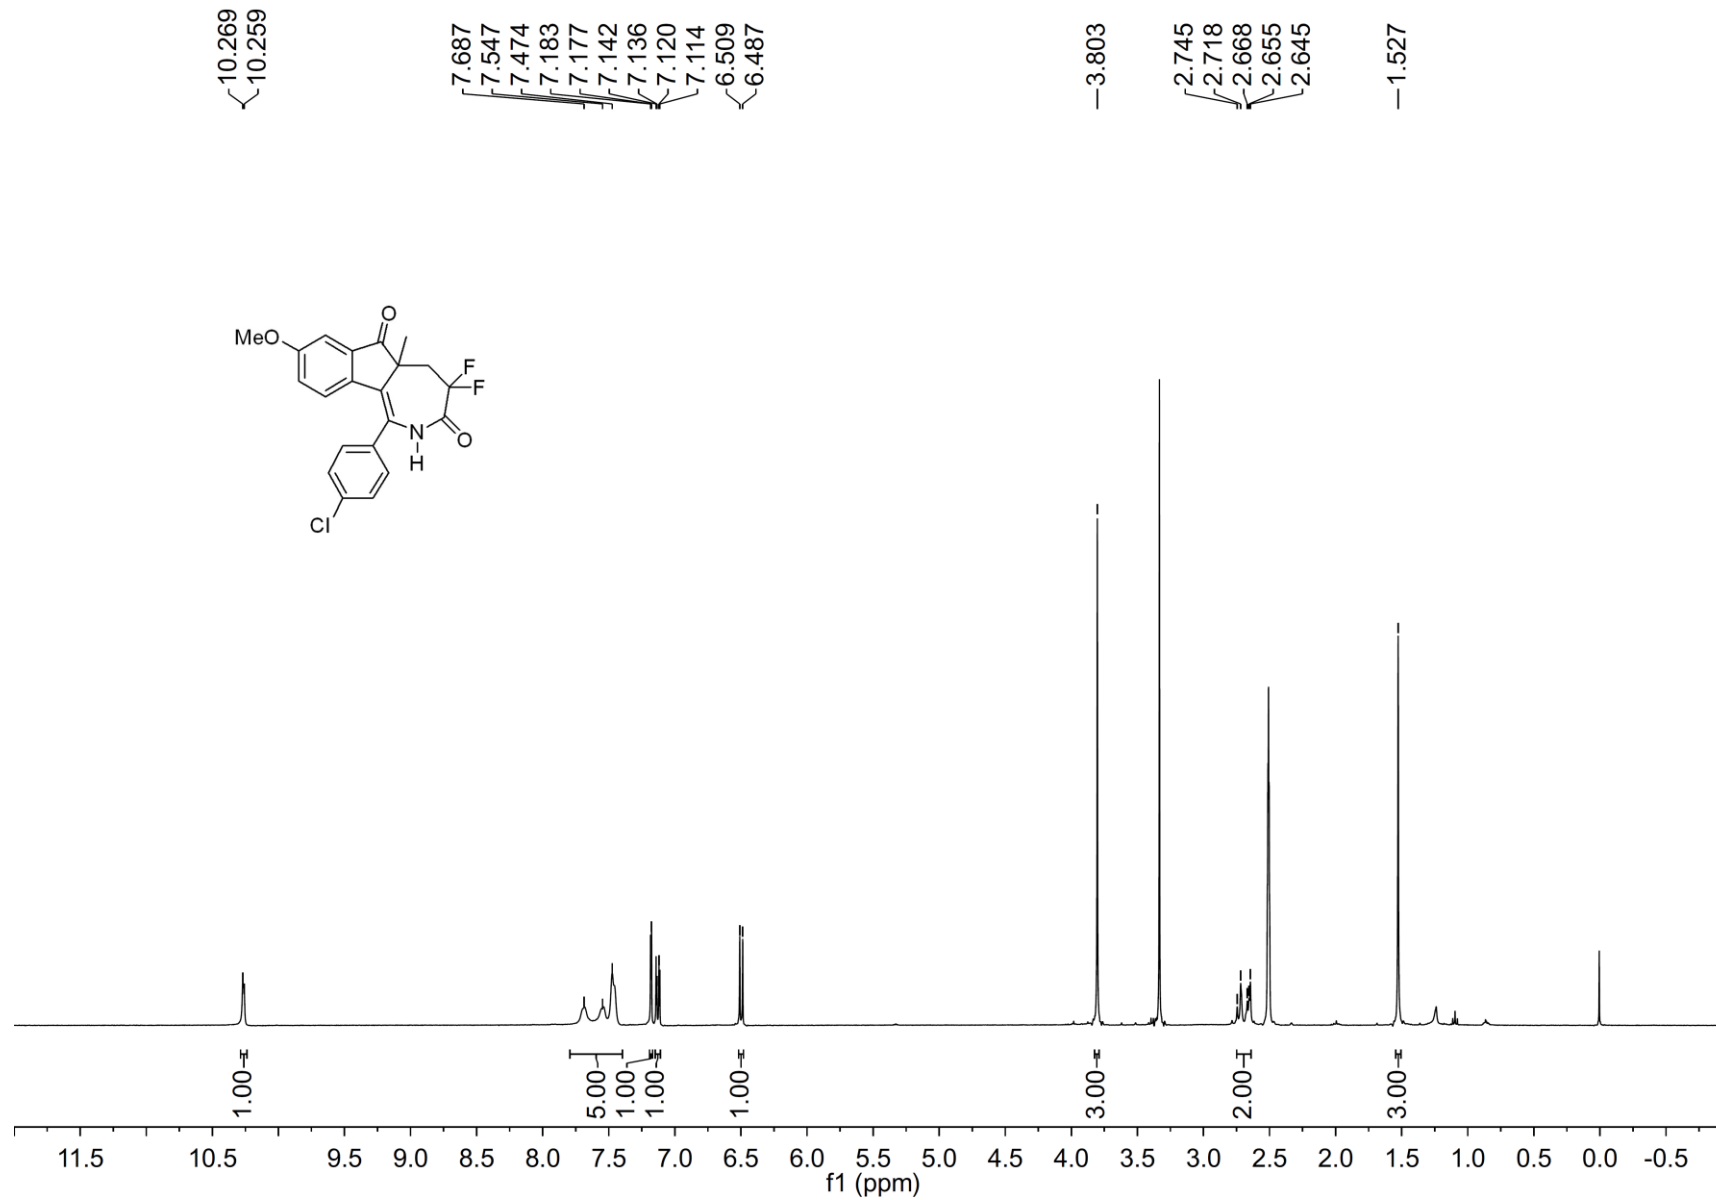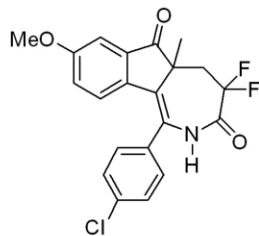

<sup>1</sup>H NMR Spectrum of Compound 3u

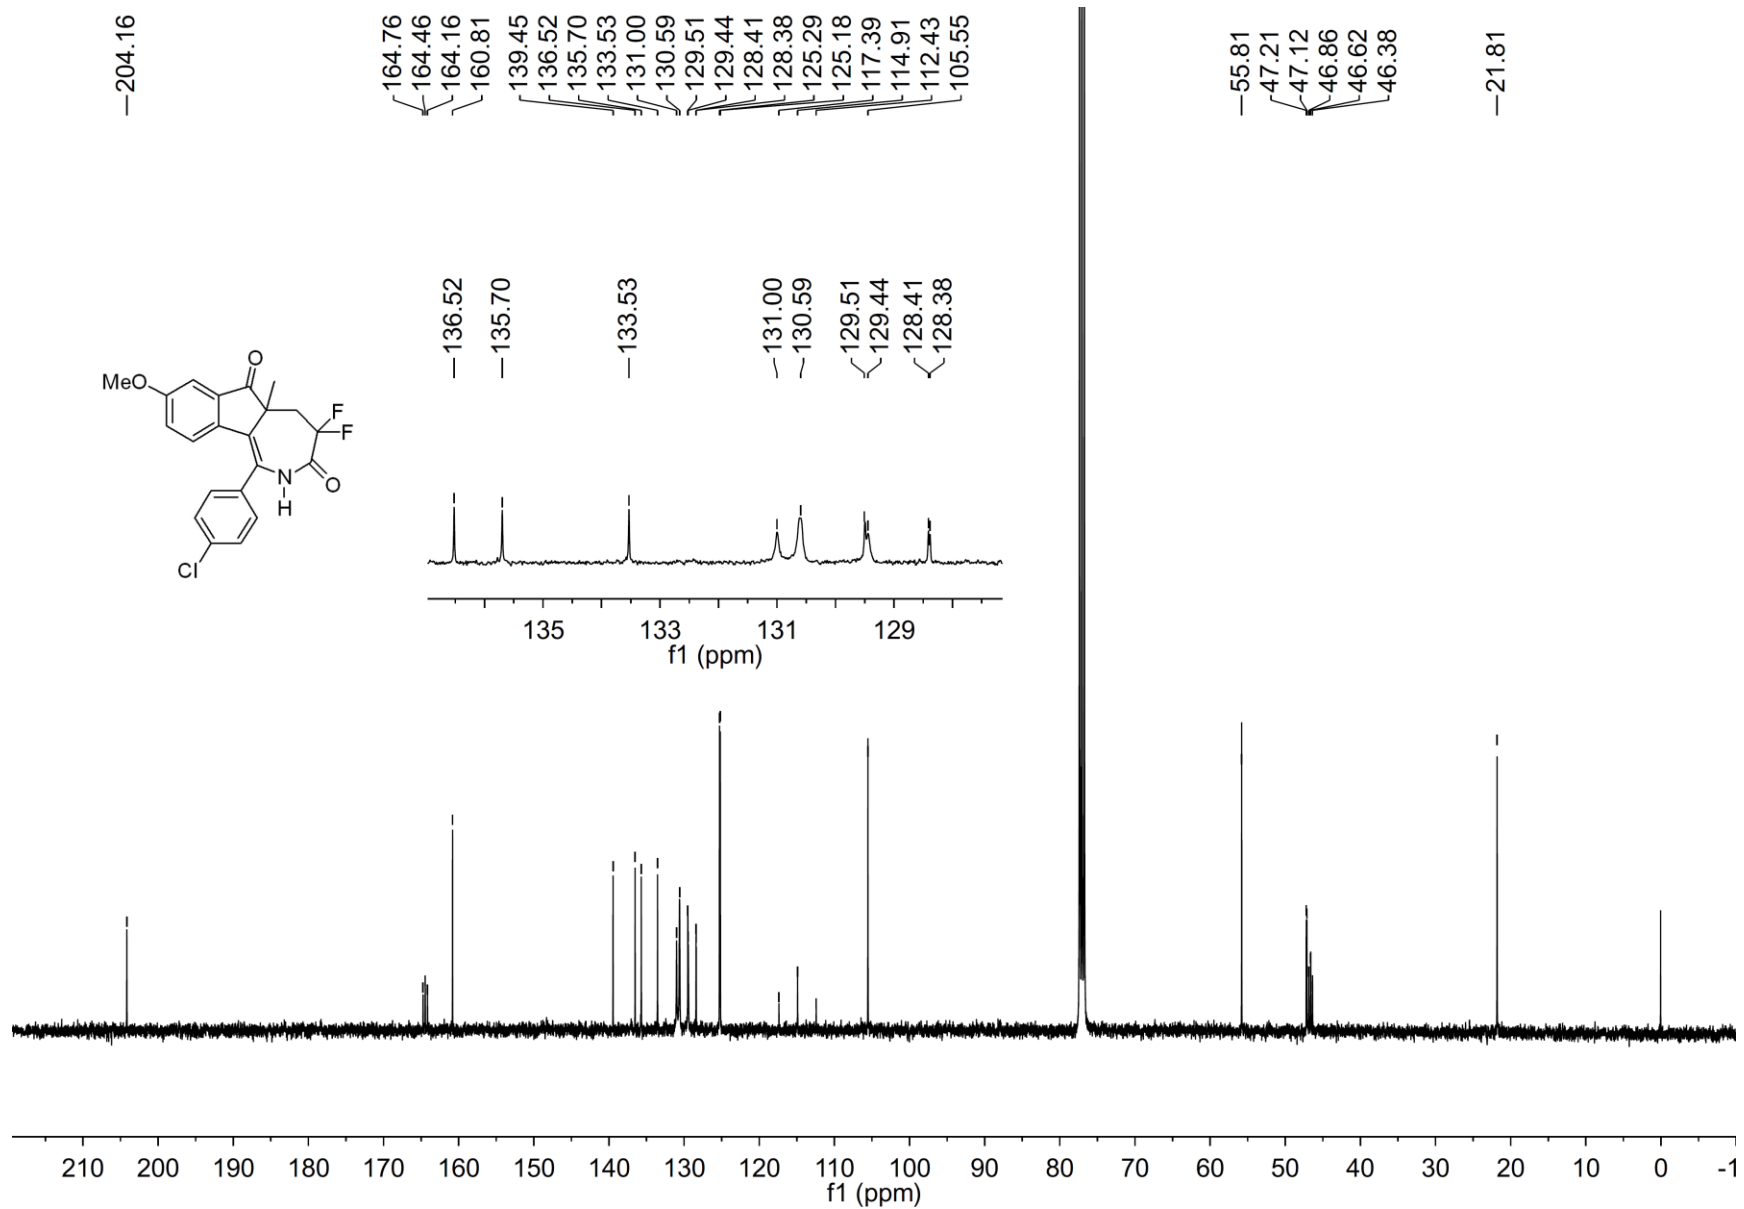

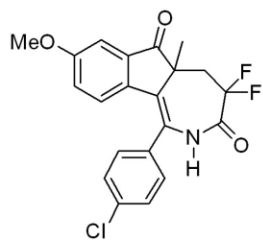

~ -95.26  
~ -95.93  
~ -98.25  
~ -98.92

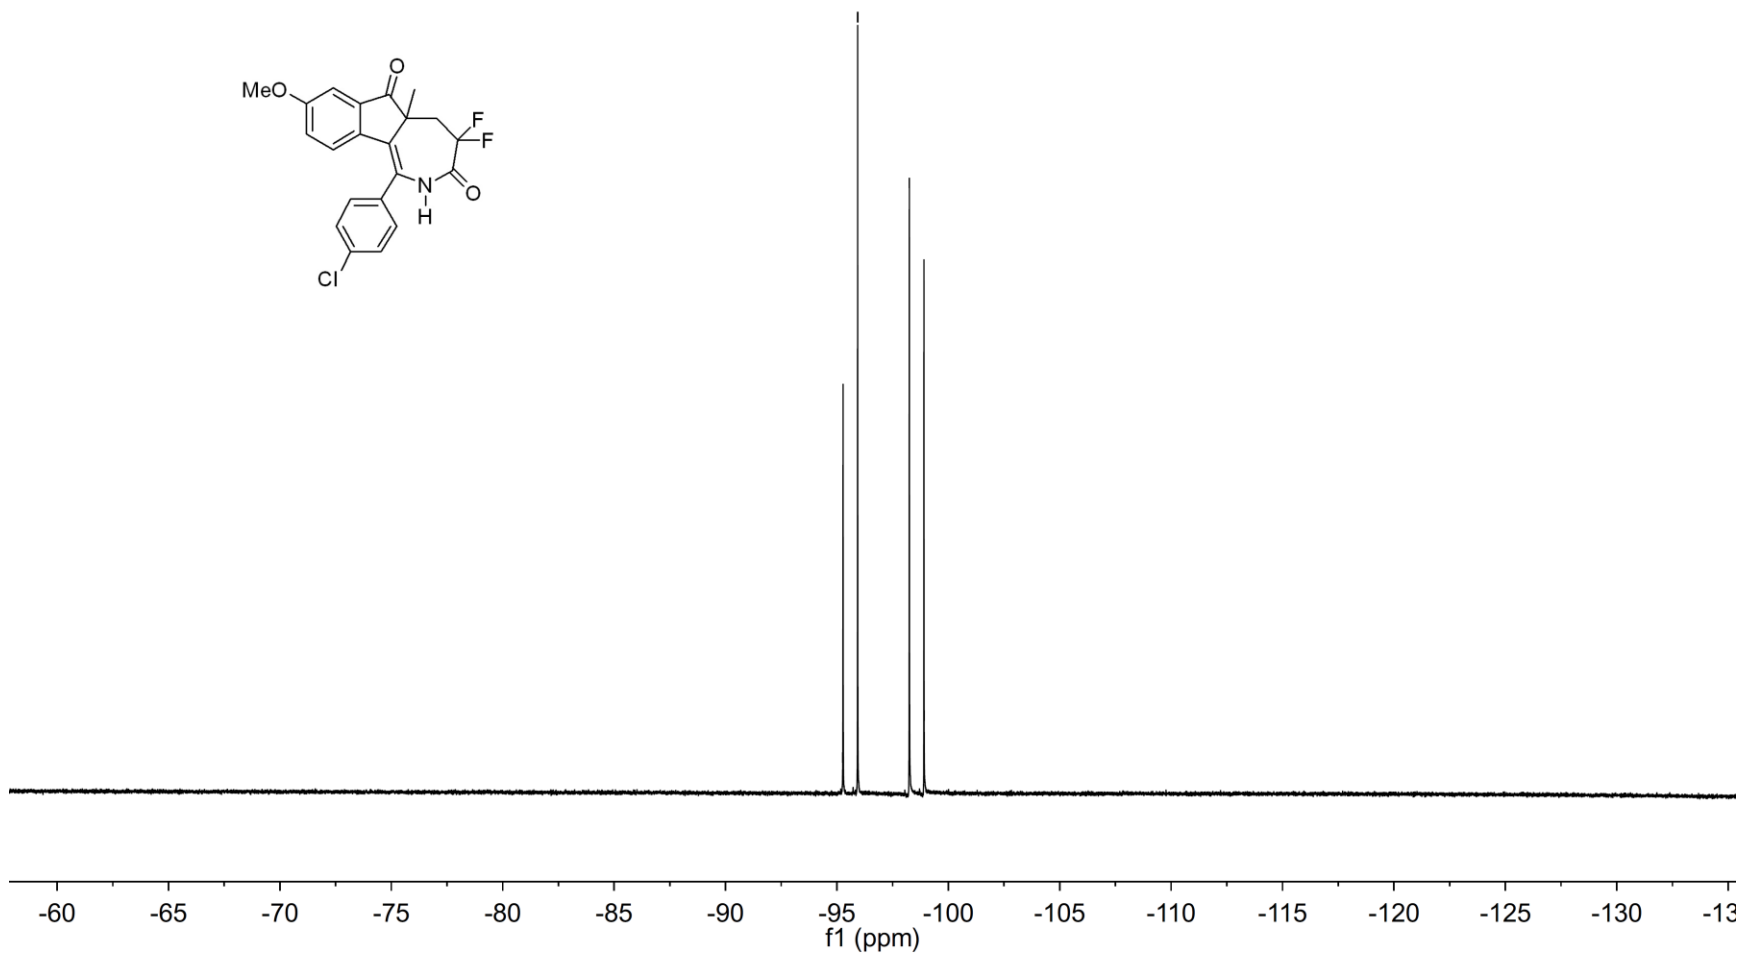

<sup>19</sup>F NMR Spectrum of Compound 3u

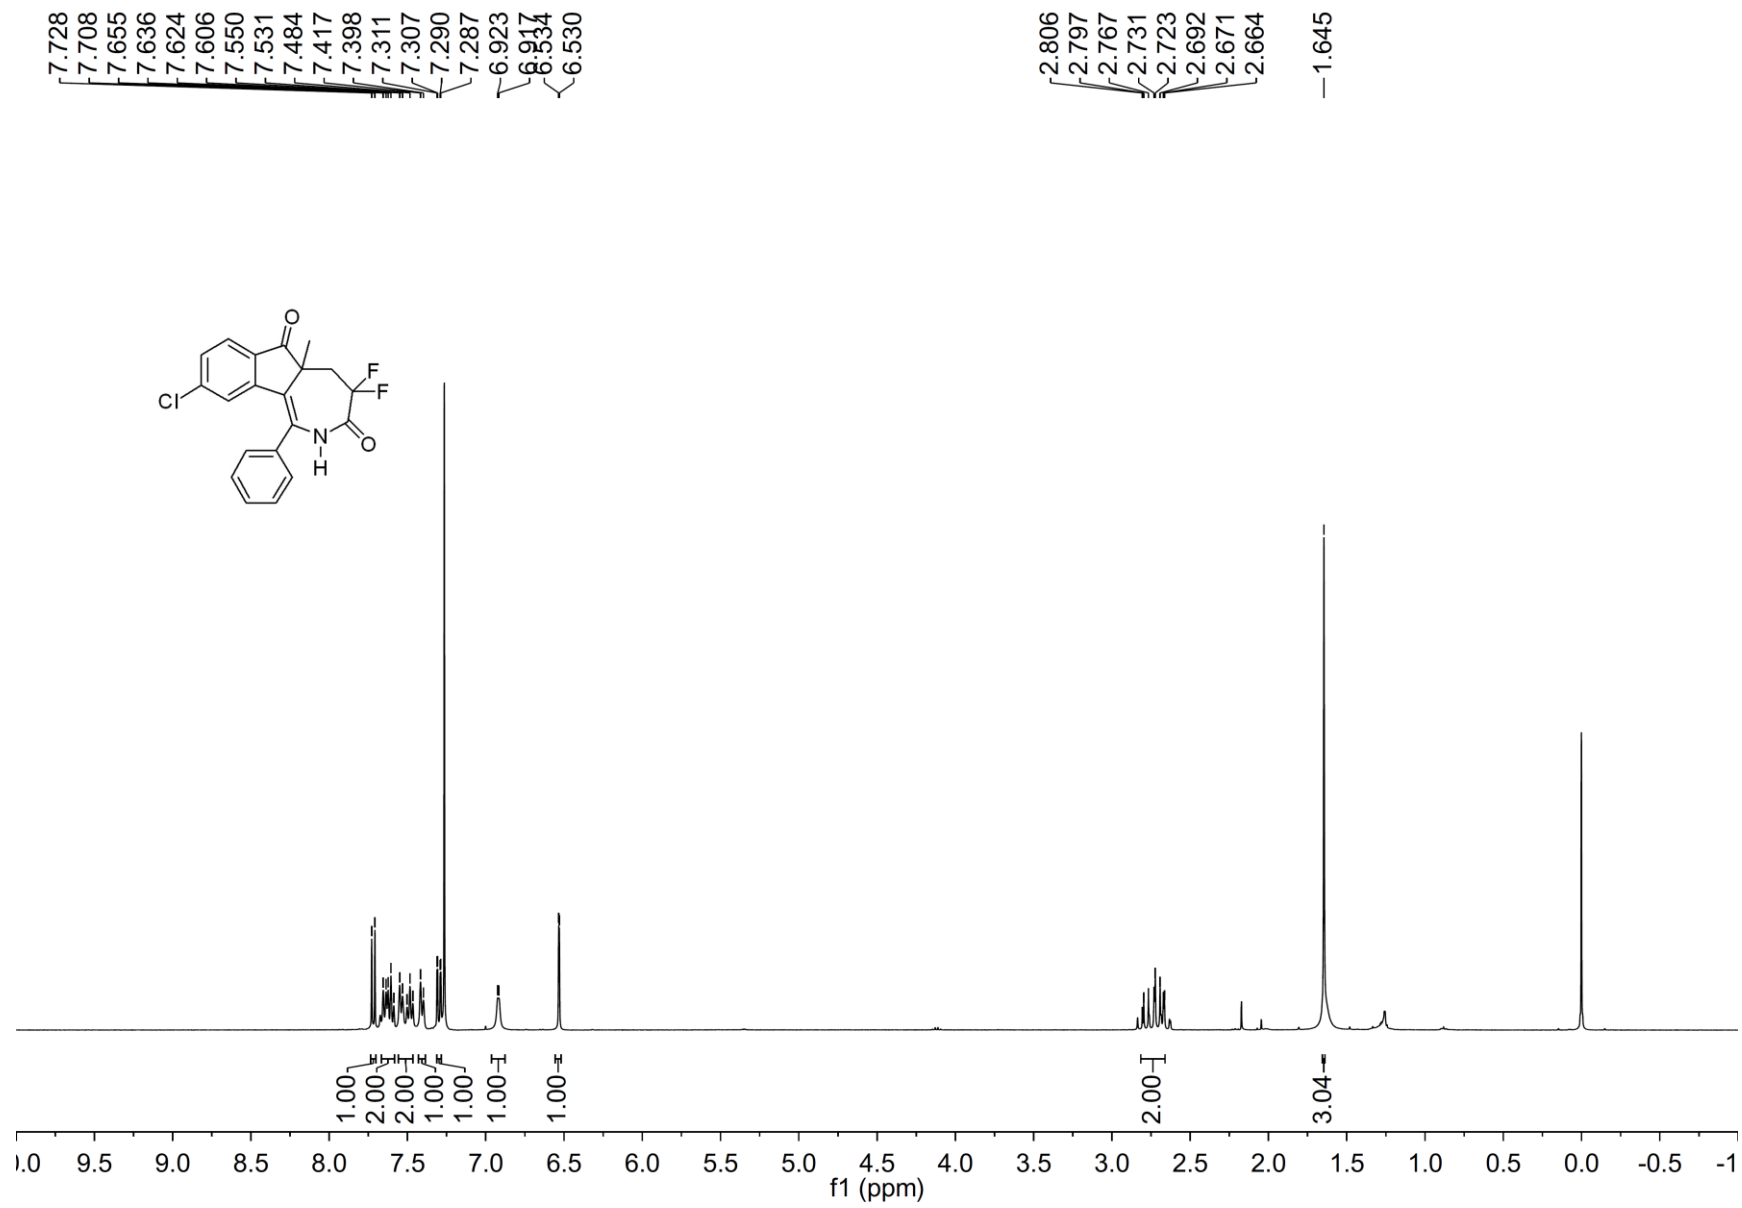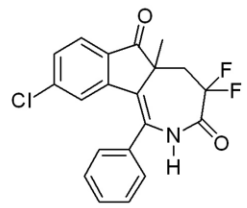

<sup>1</sup>H NMR Spectrum of Compound 3v

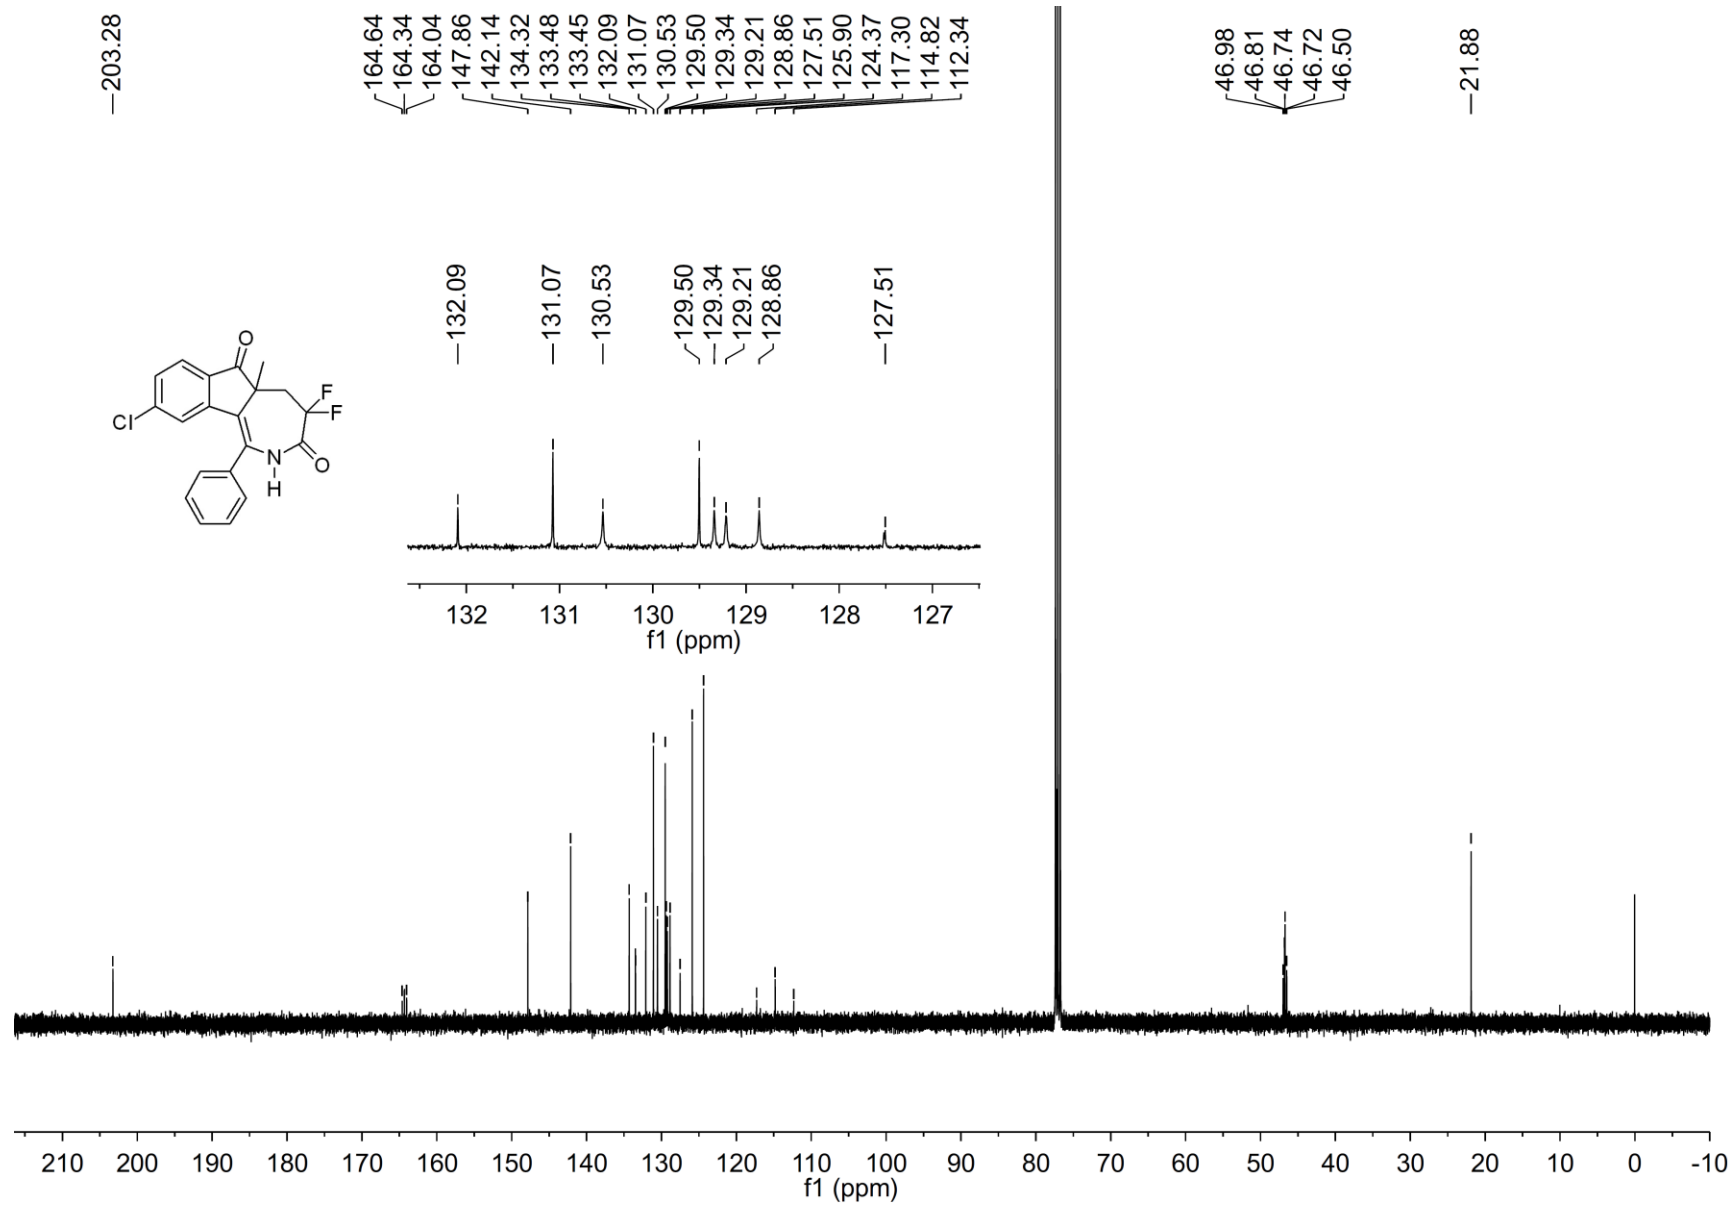

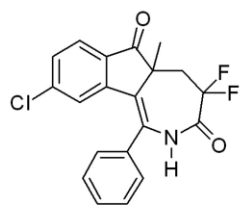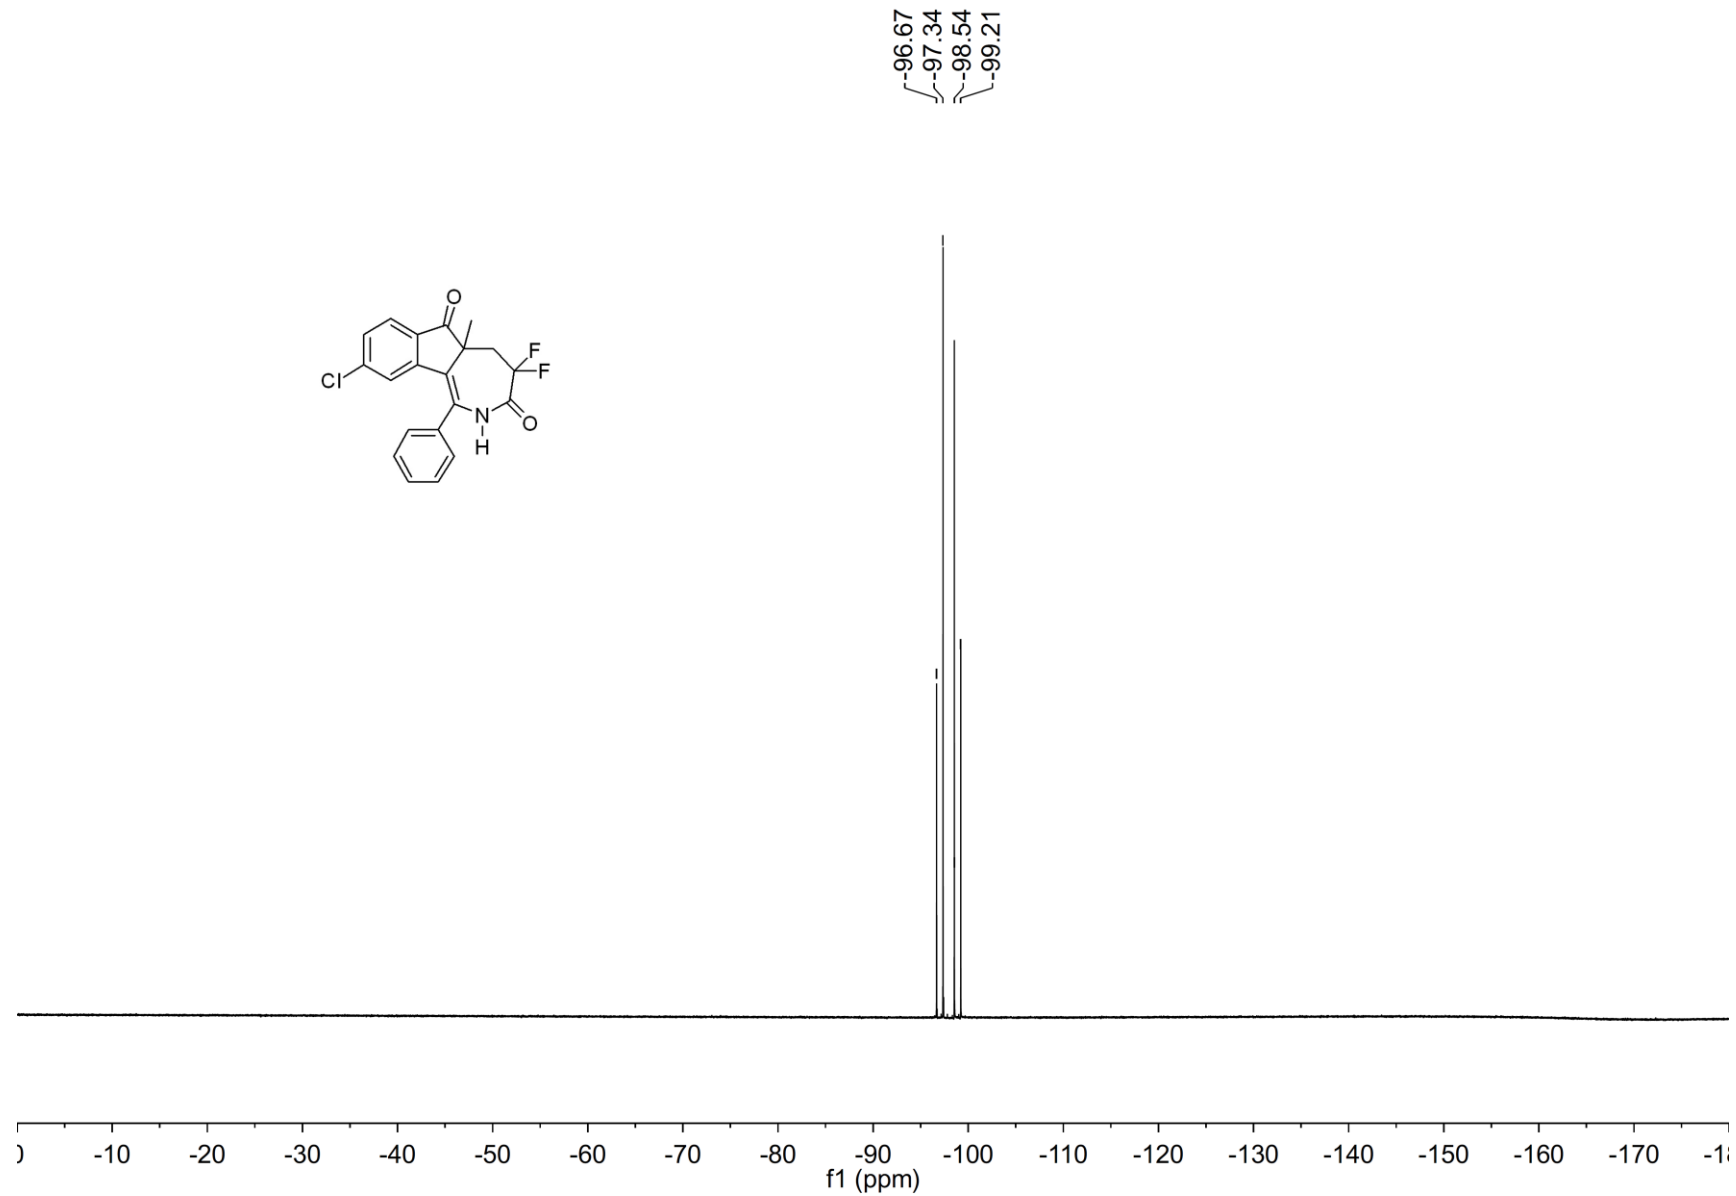

$^{19}\text{F}$  NMR Spectrum of Compound 3v

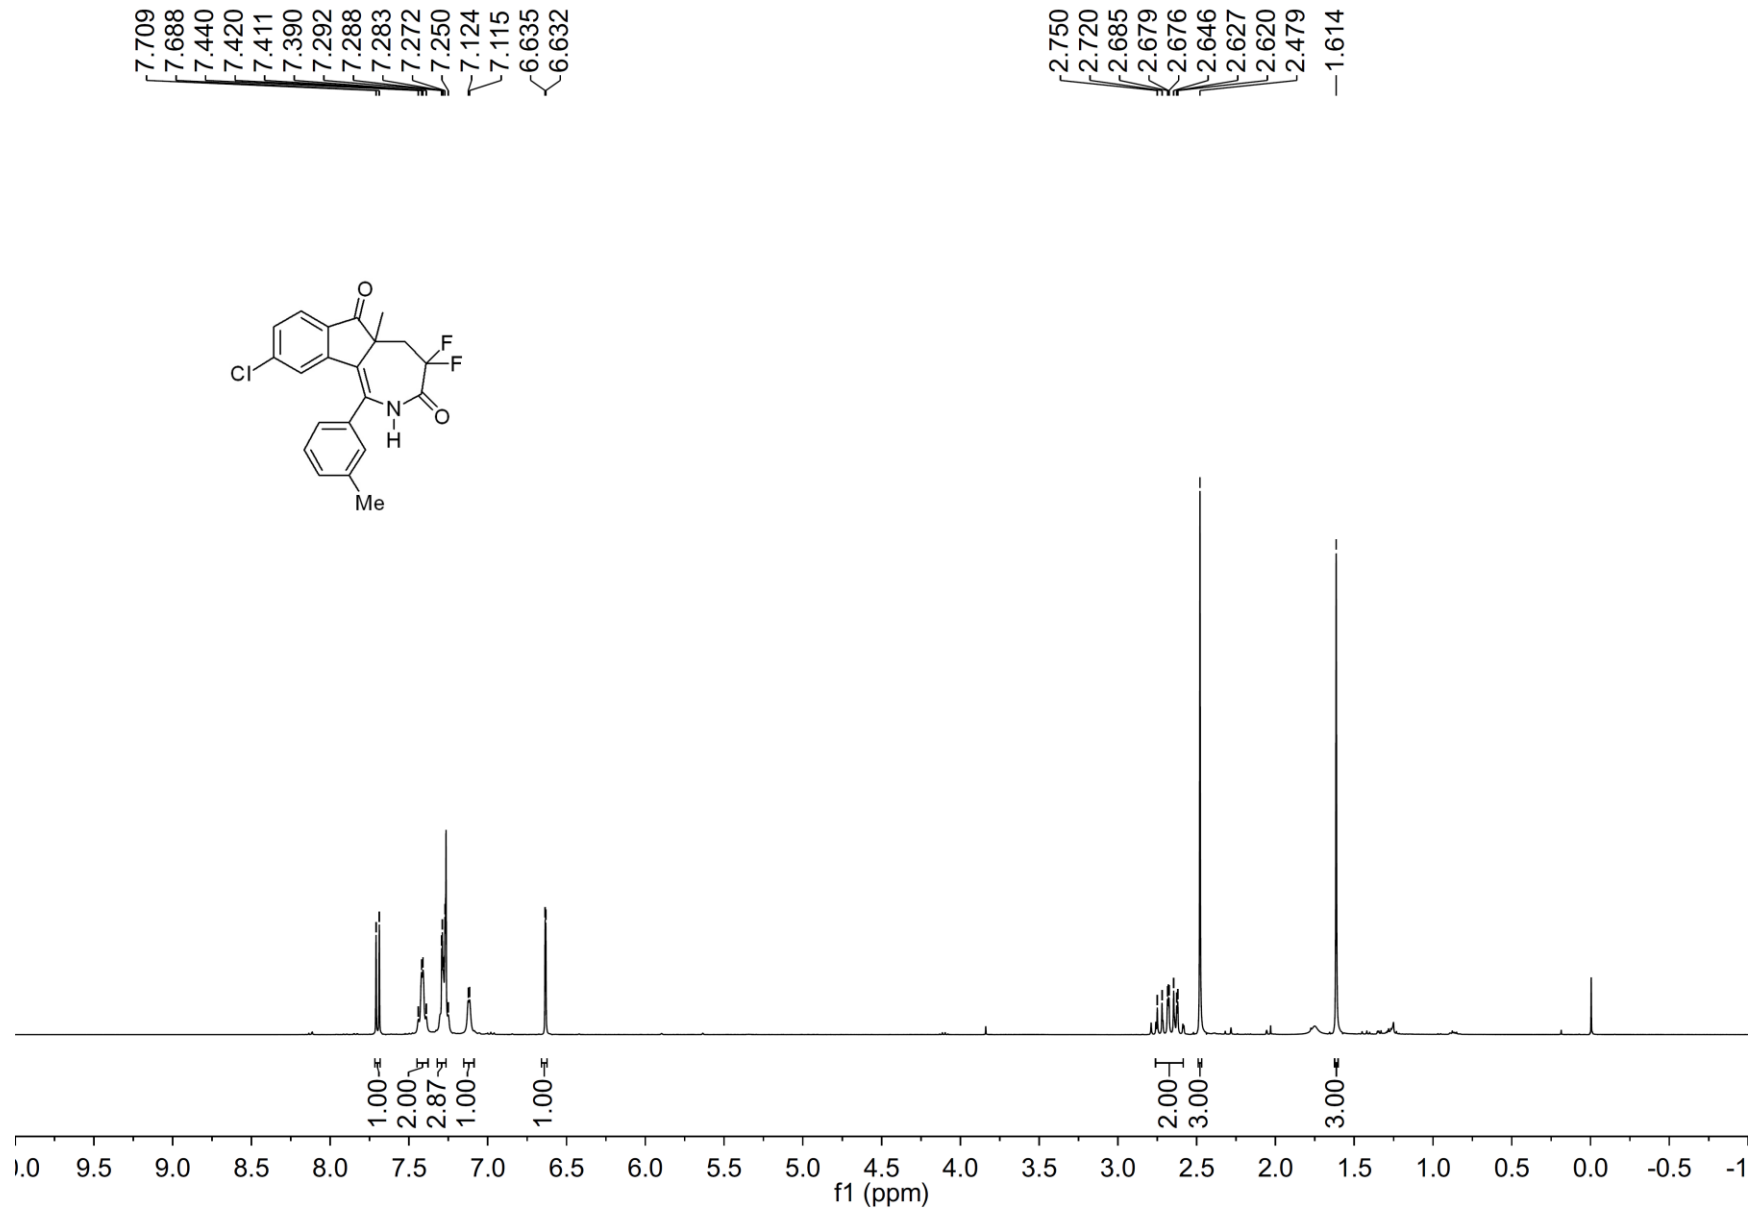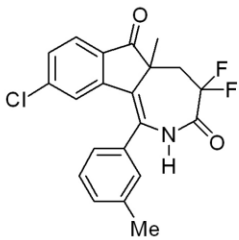

<sup>1</sup>H NMR Spectrum of Compound 3w

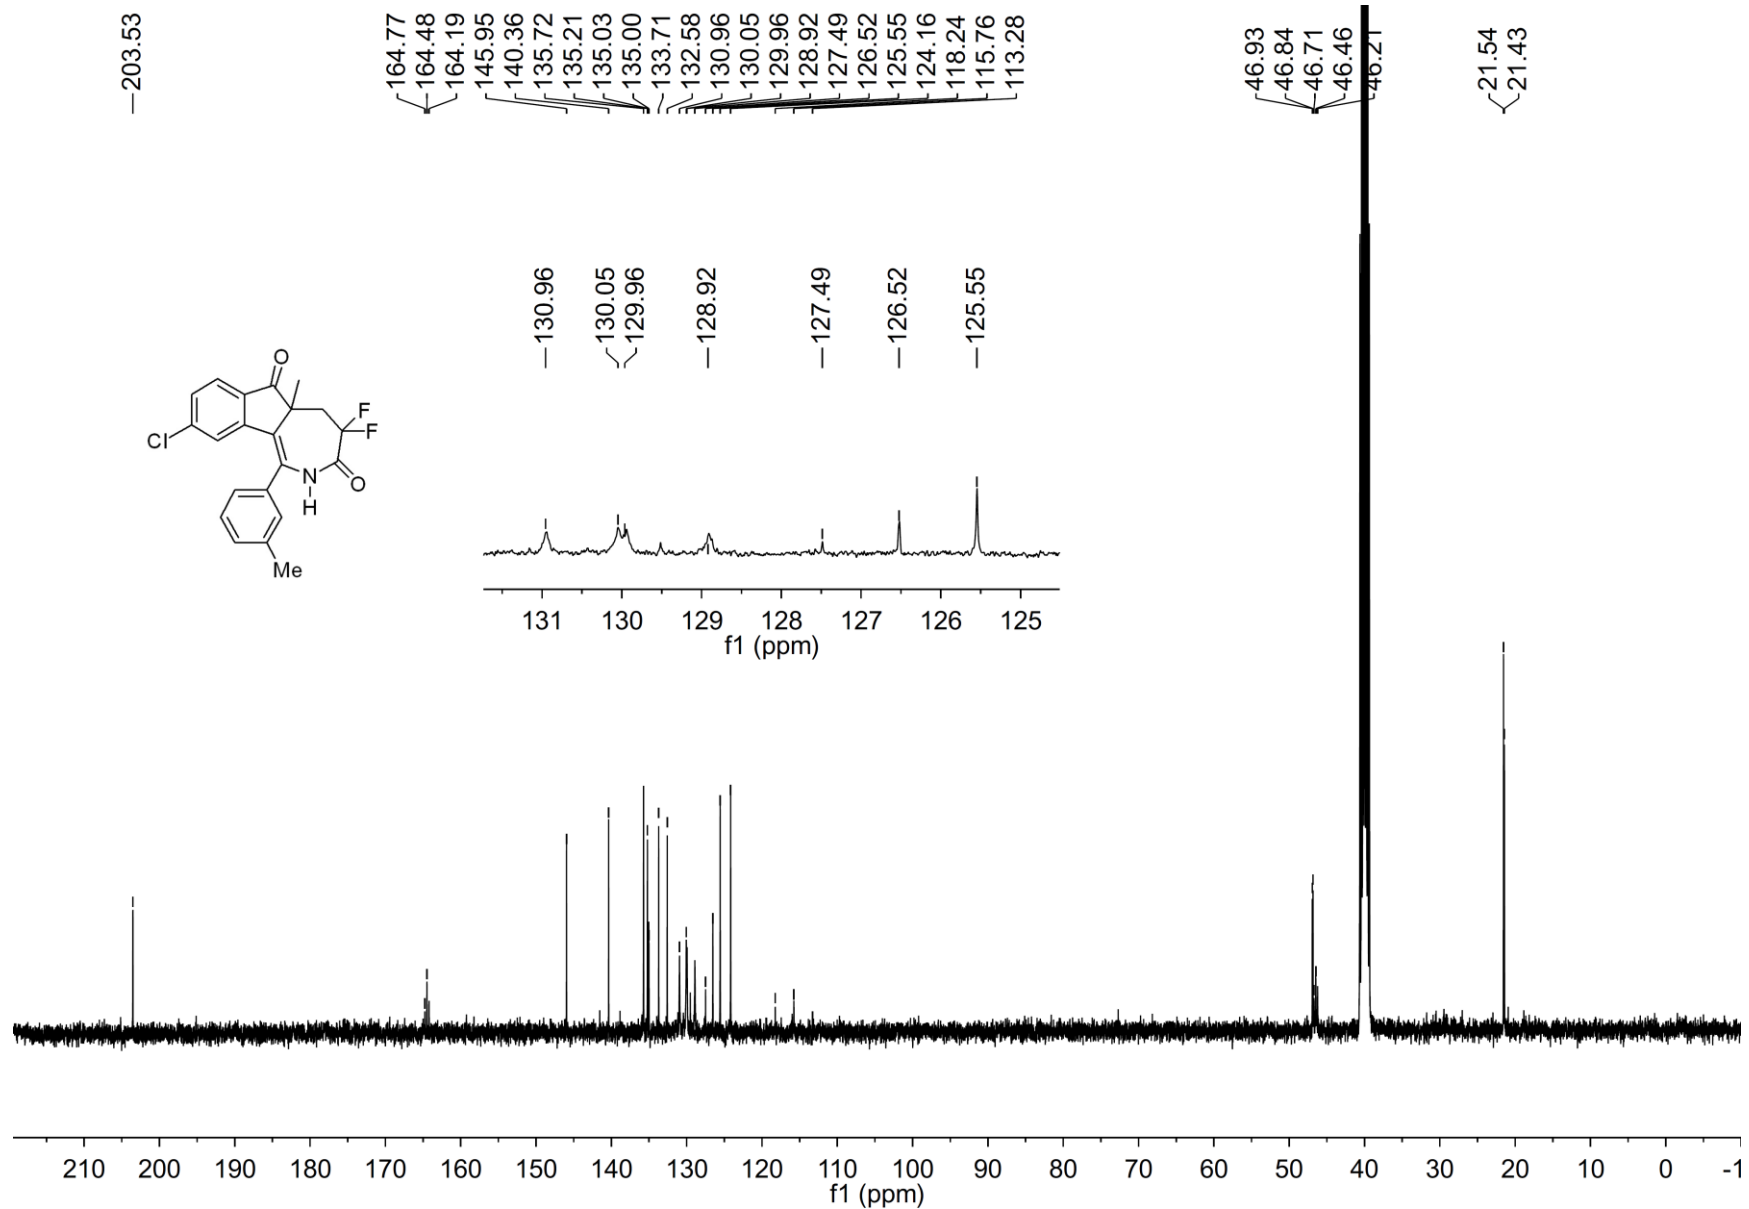



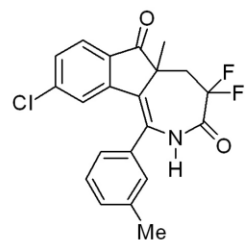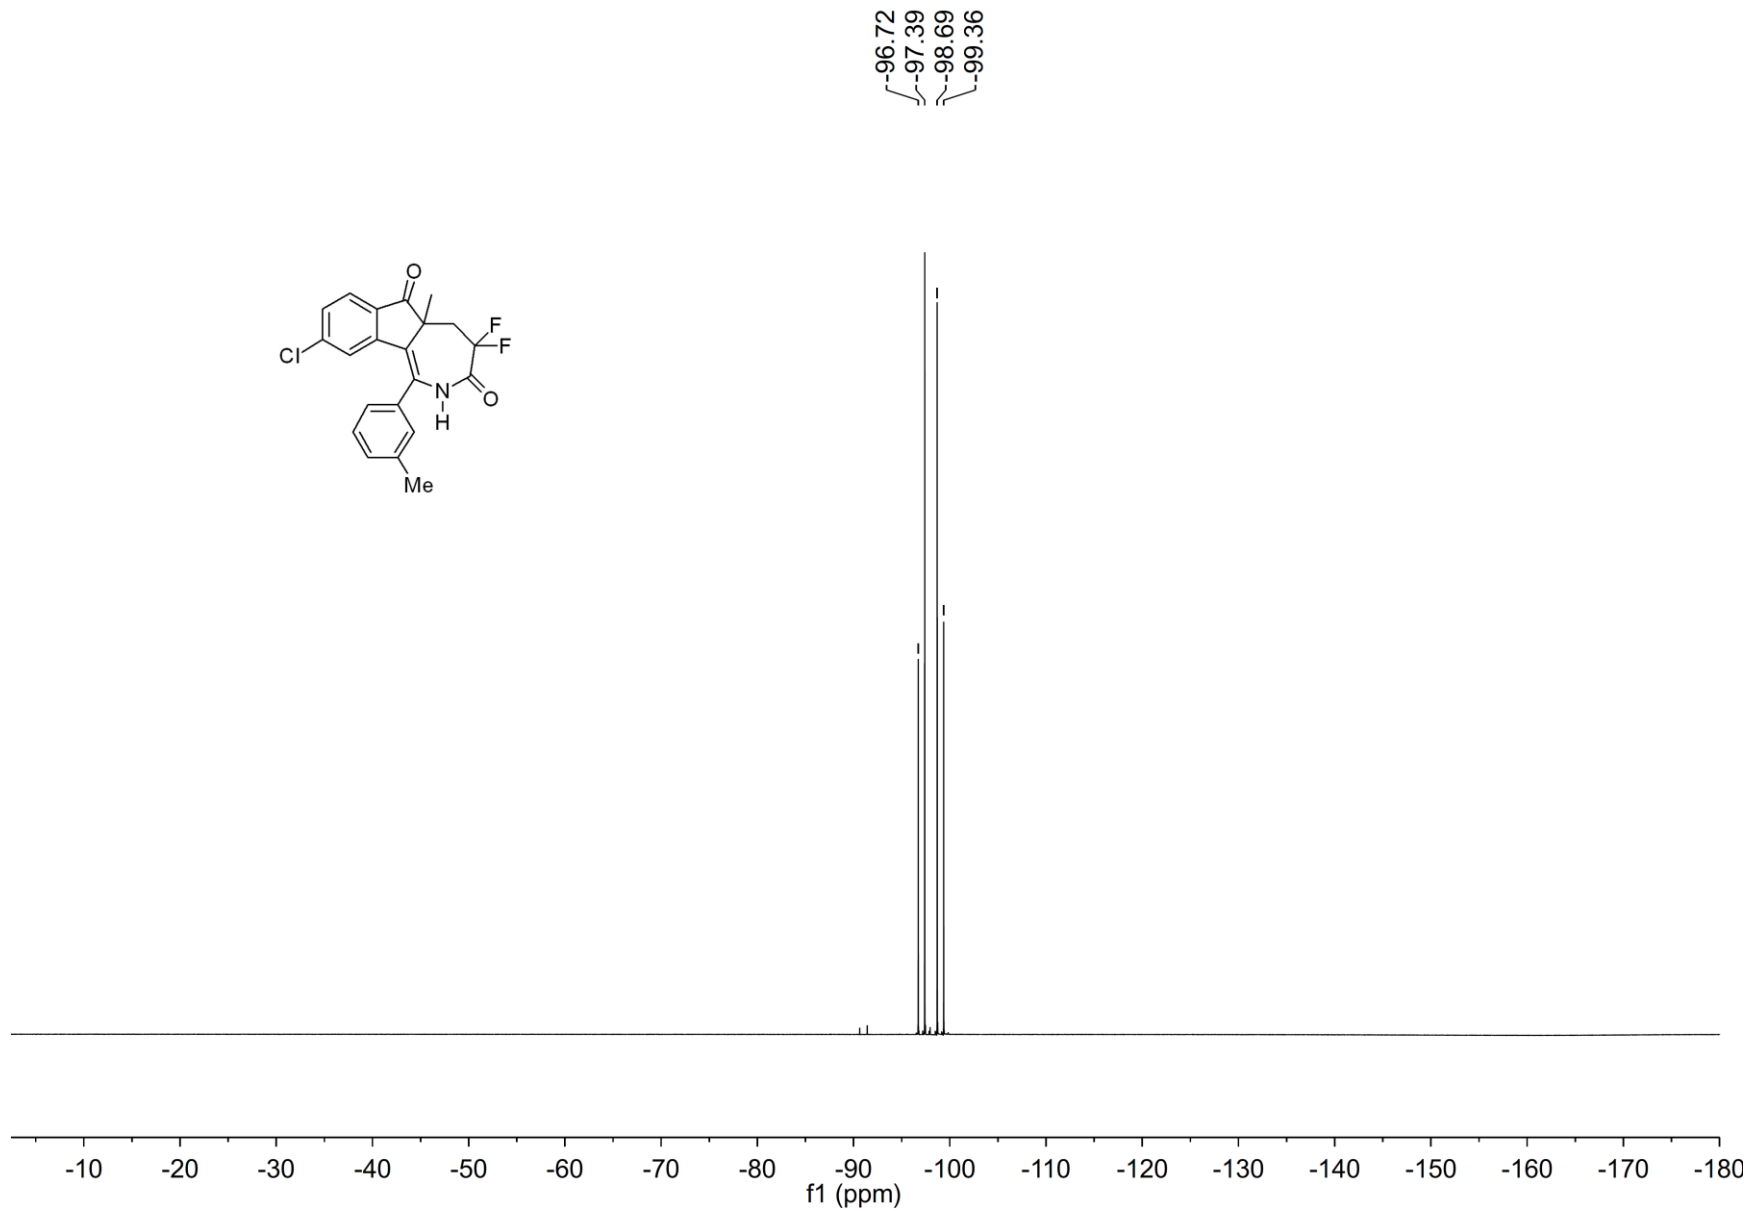

$^{19}\text{F}$  NMR Spectrum of Compound 3w

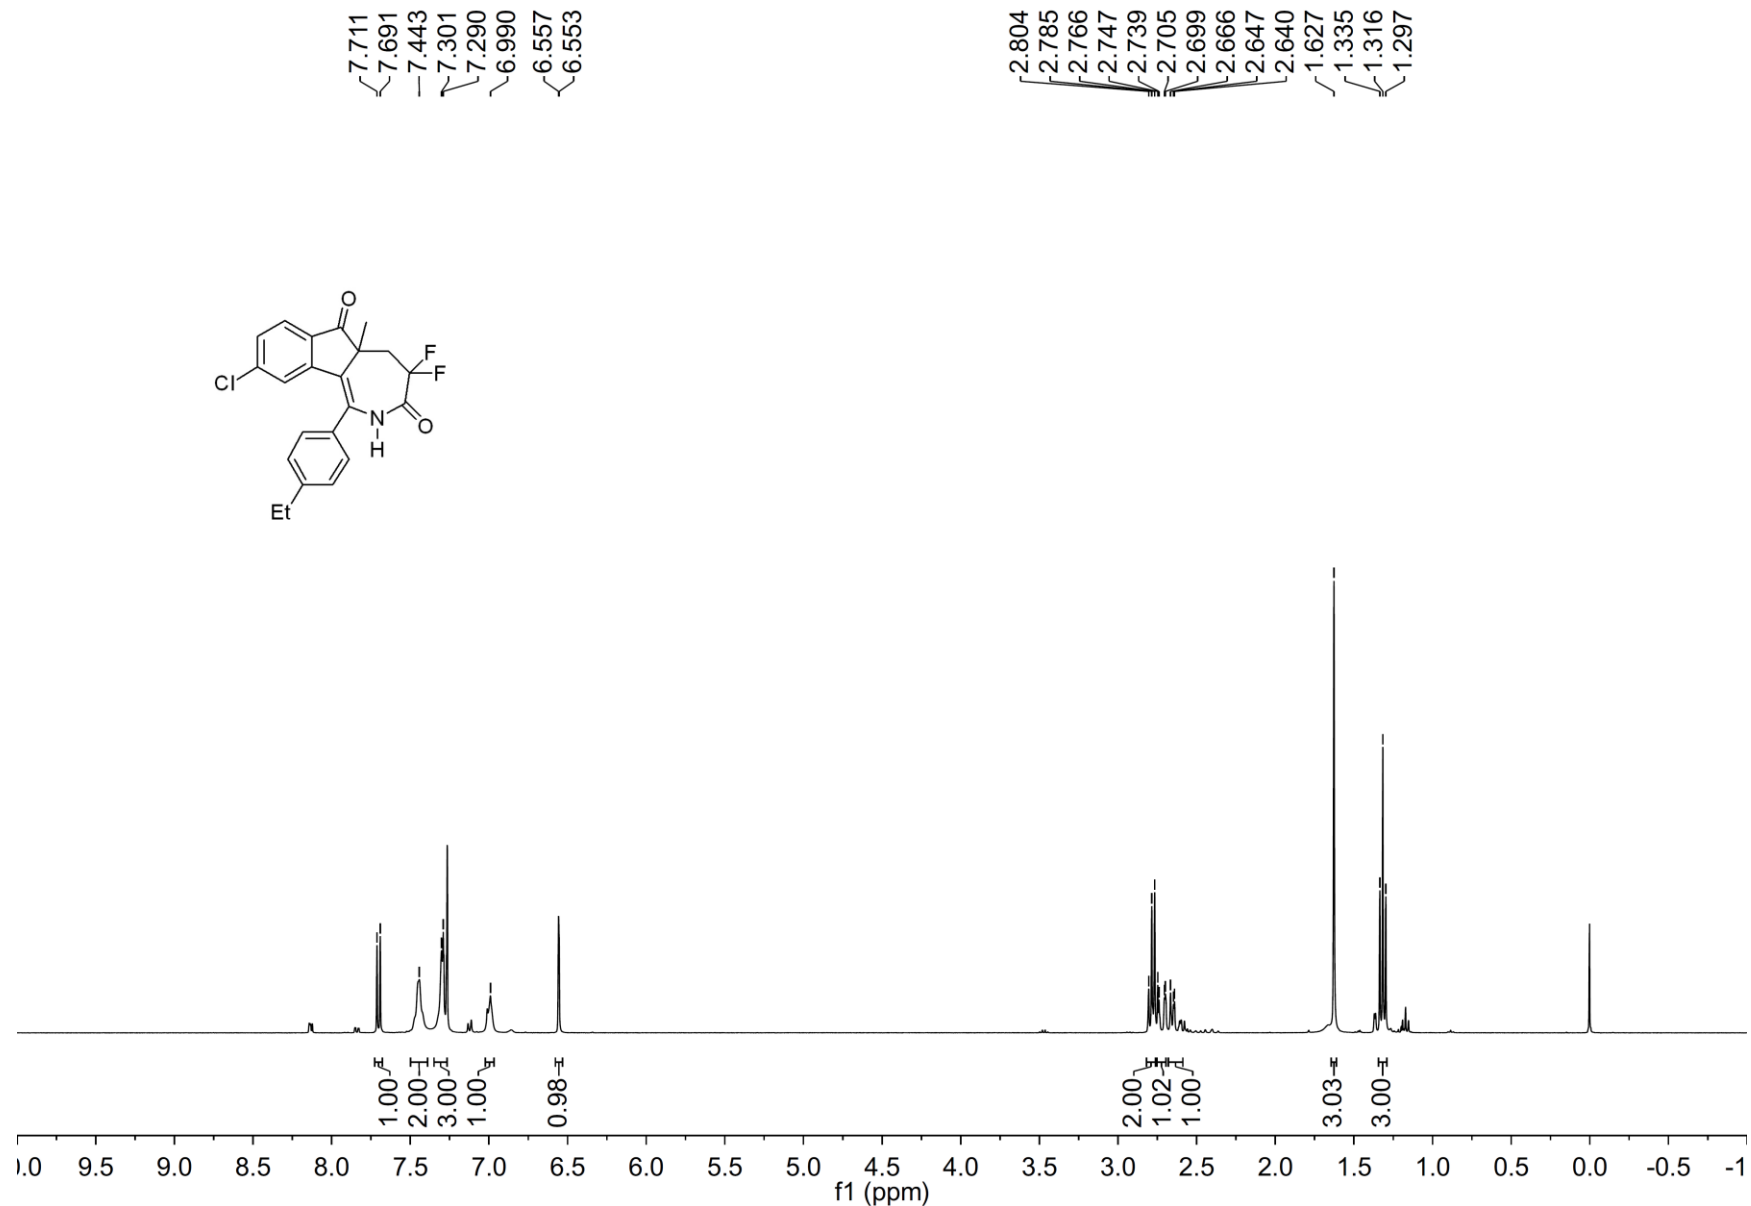

<sup>1</sup>H NMR Spectrum of Compound 3x

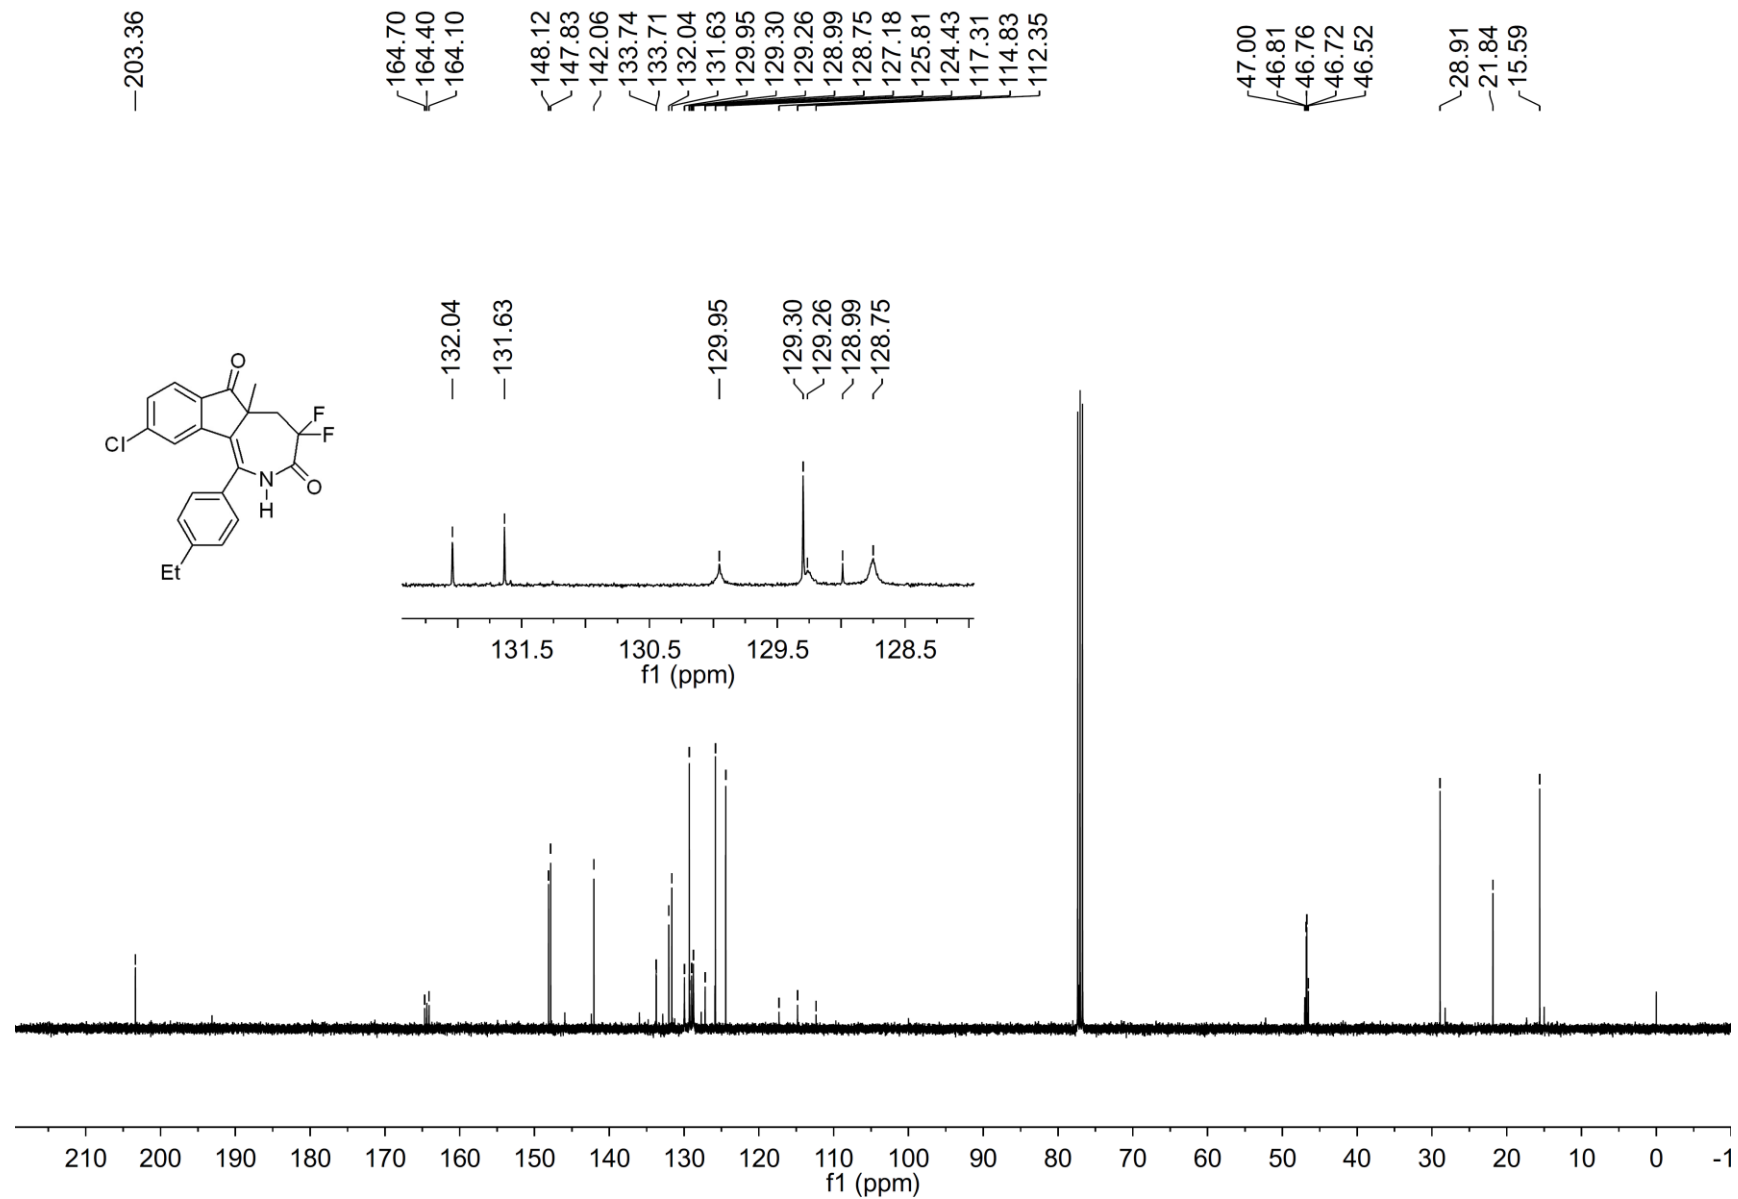

<sup>13</sup>C NMR Spectrum of Compound 3x

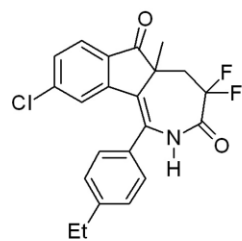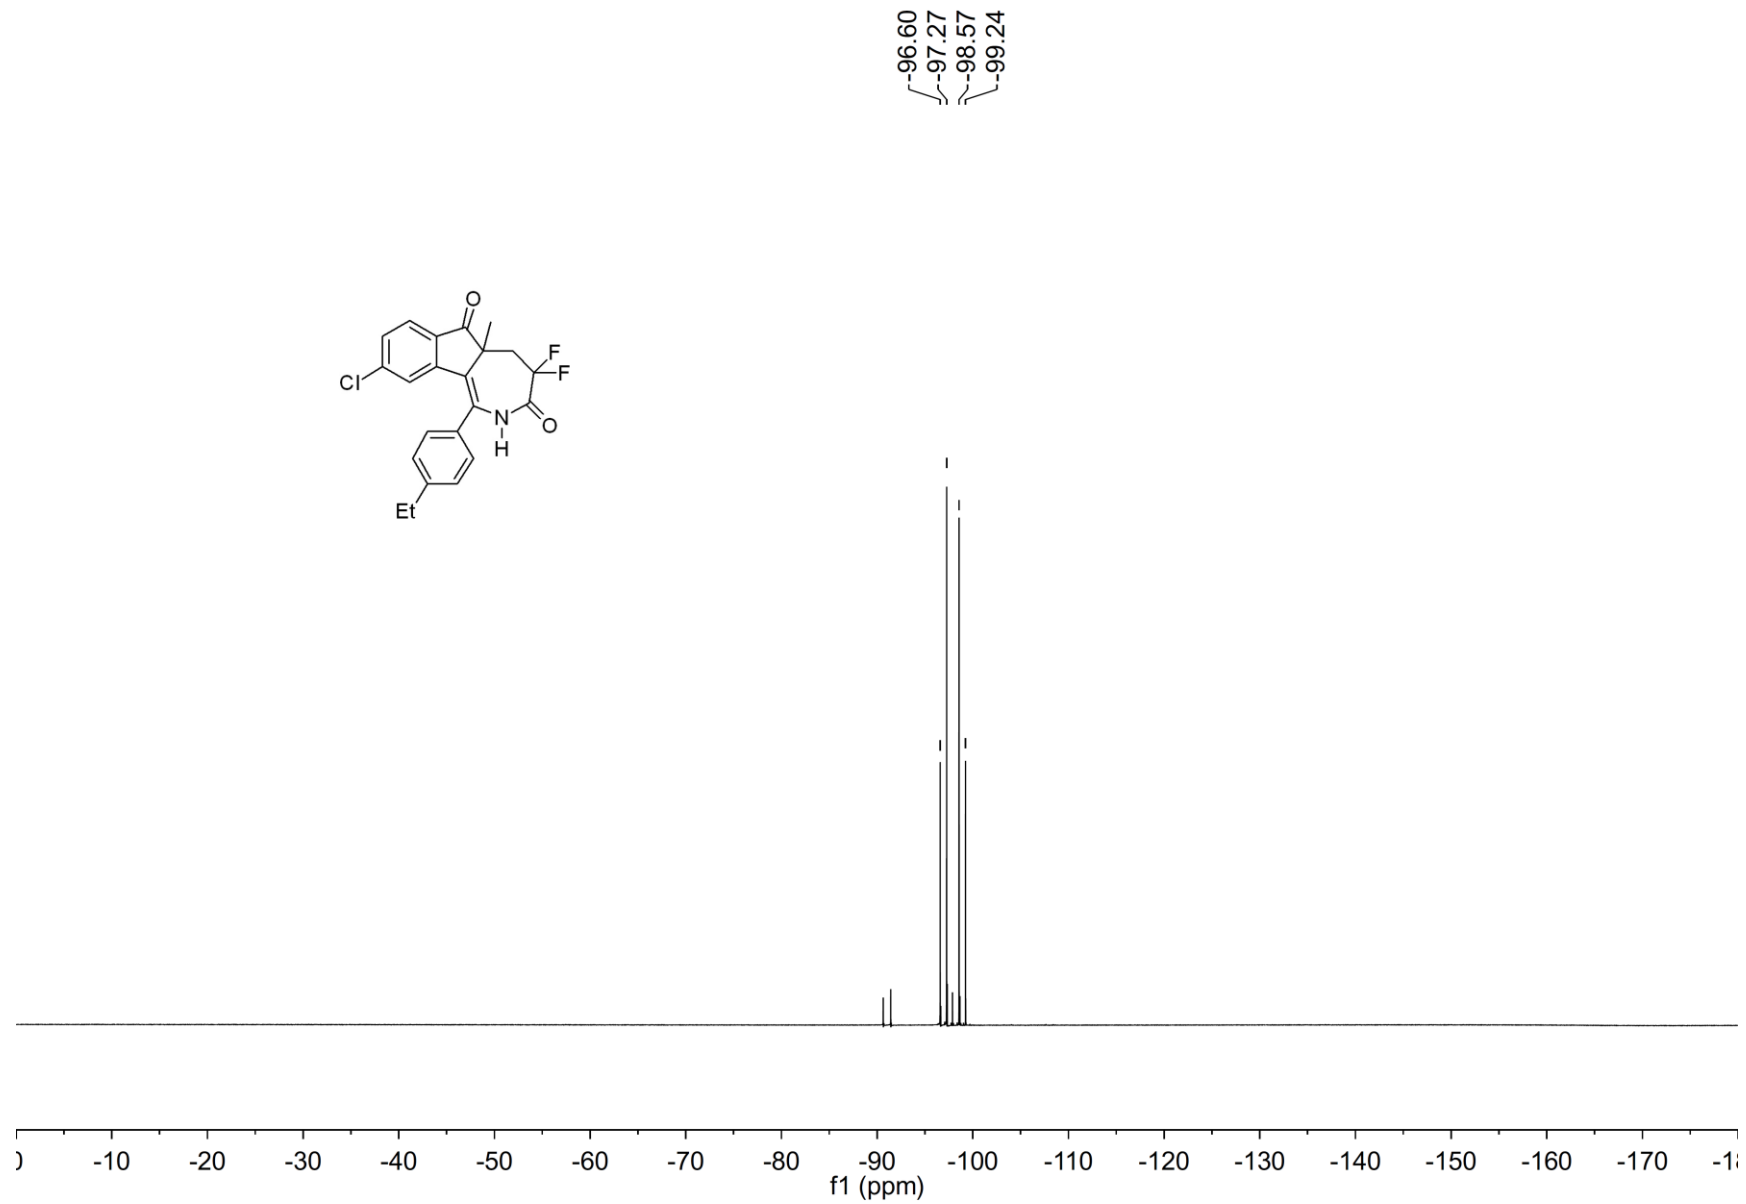

$^{19}\text{F}$  NMR Spectrum of Compound 3x

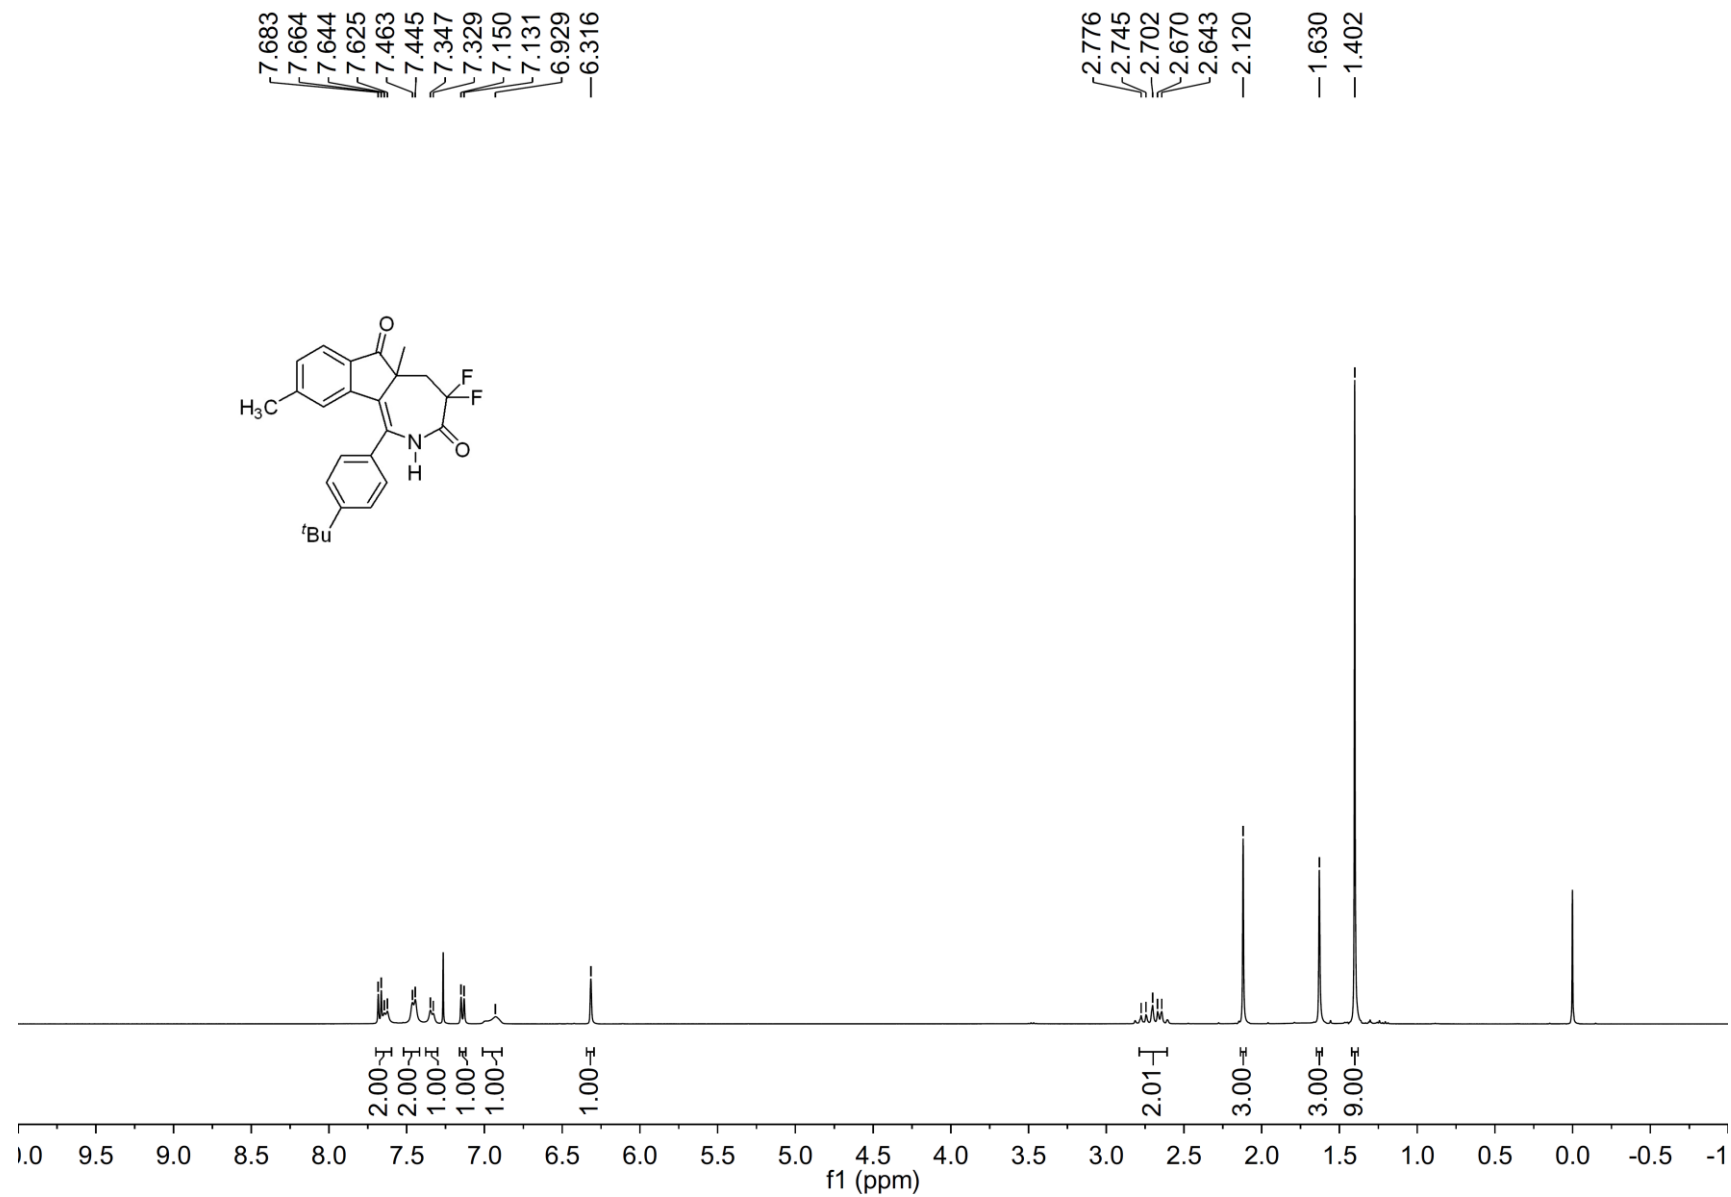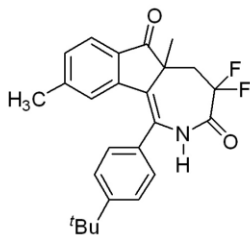

<sup>1</sup>H NMR Spectrum of Compound 3y

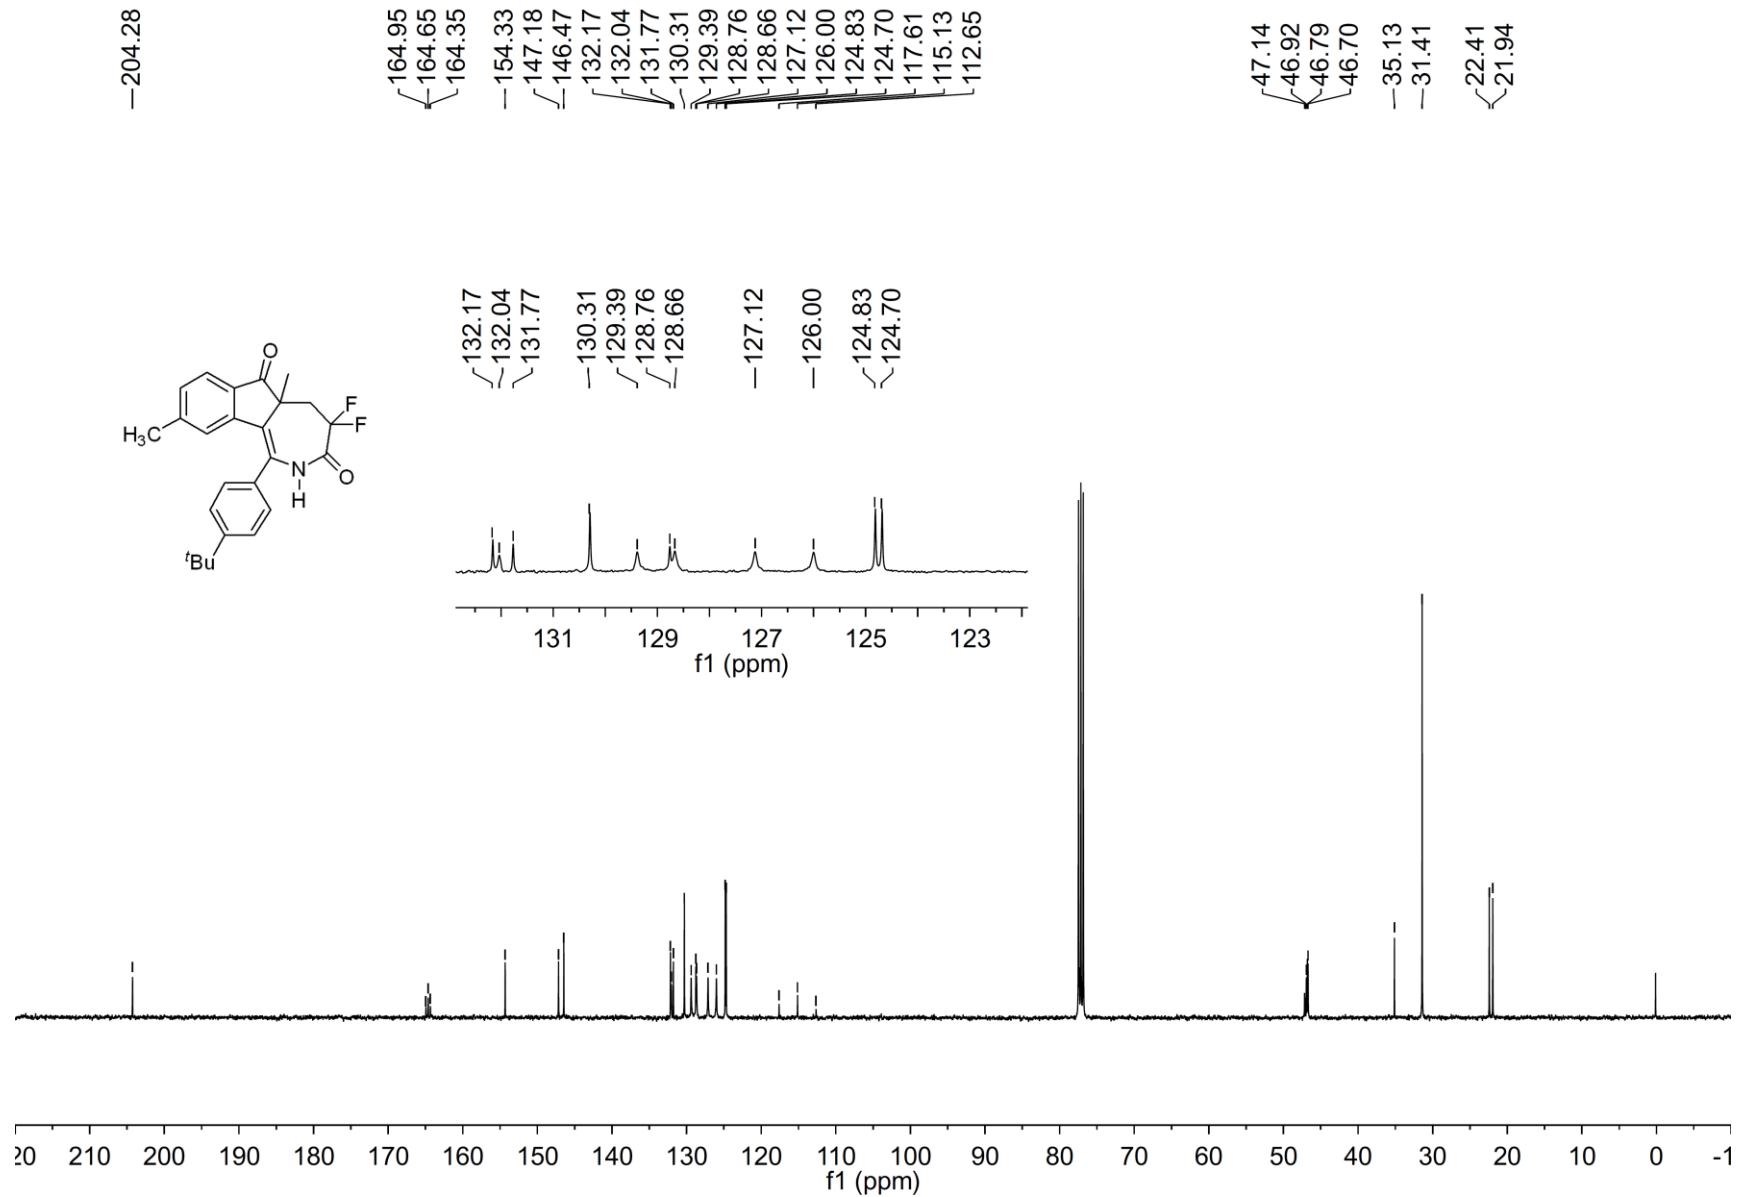

<sup>13</sup>C NMR Spectrum of Compound 3y



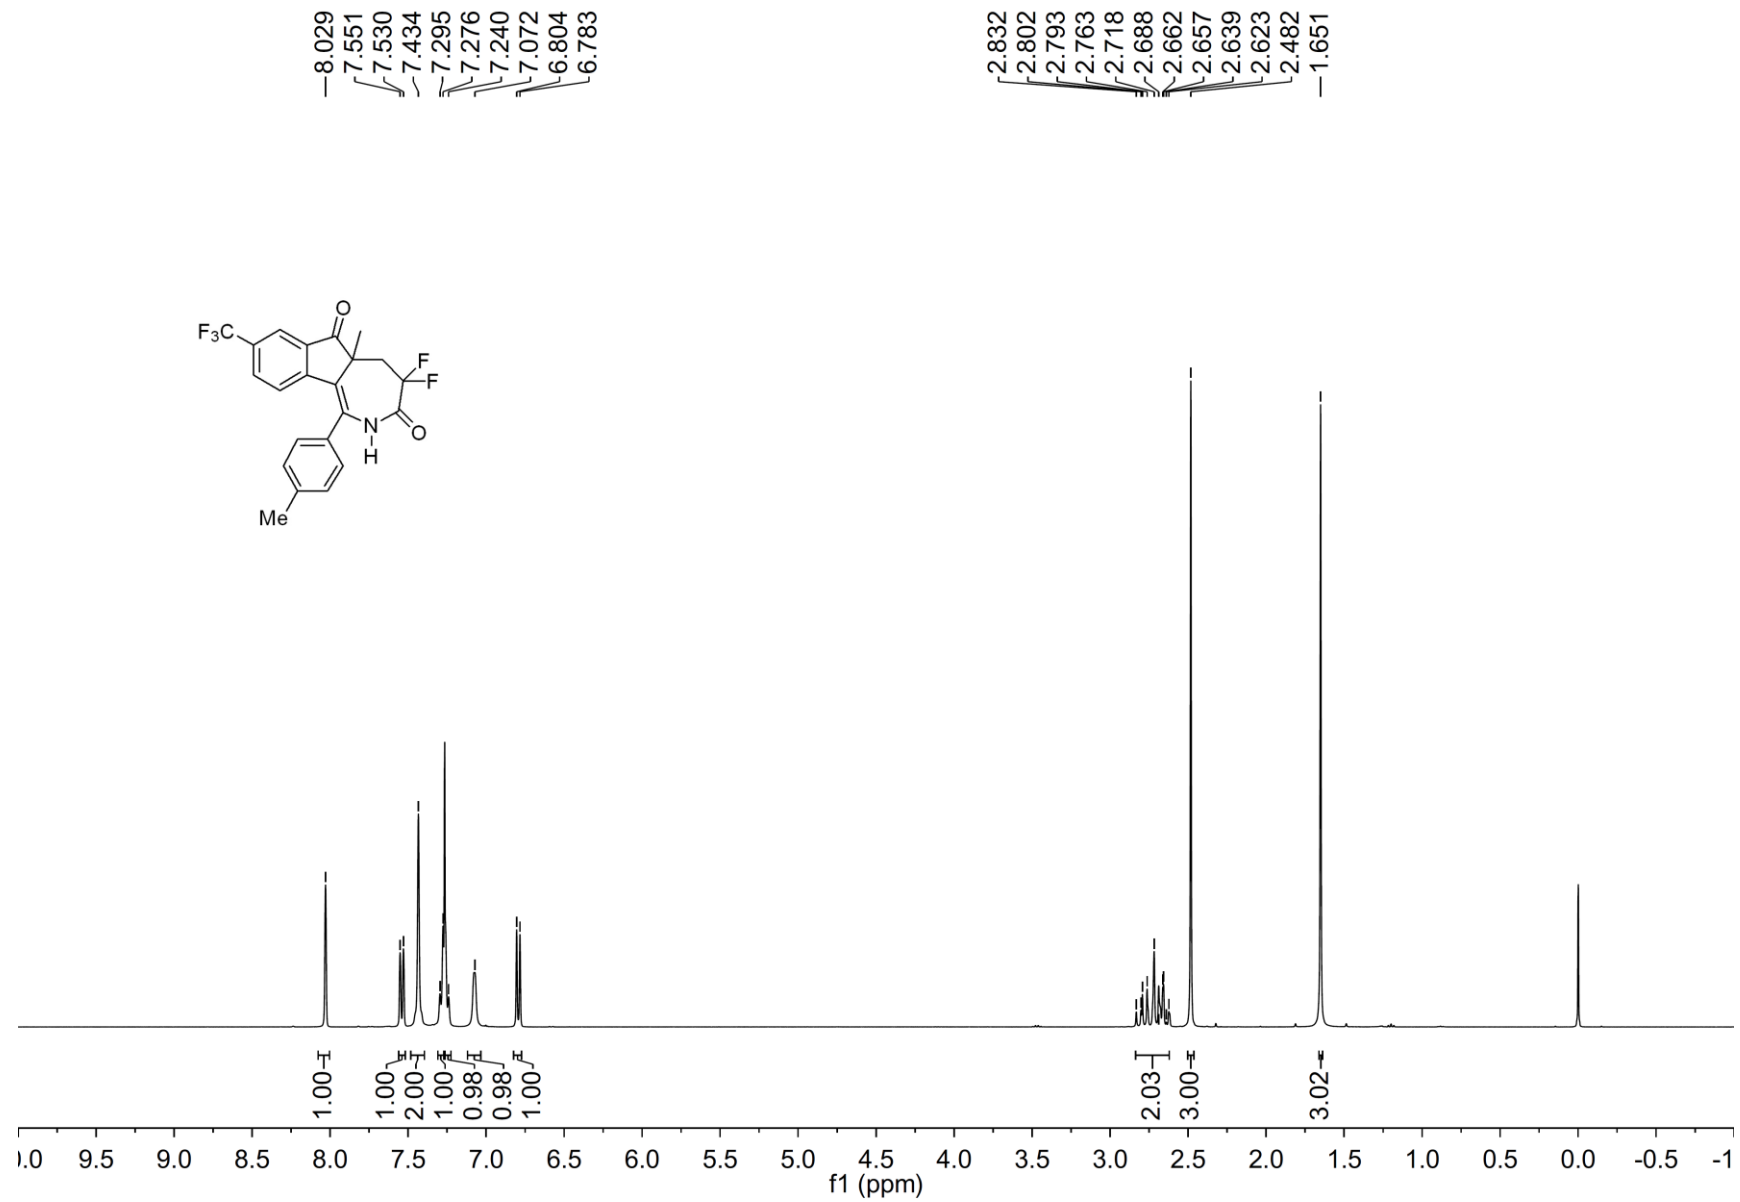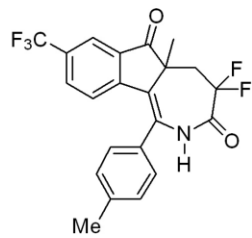

<sup>1</sup>H NMR Spectrum of Compound 3z



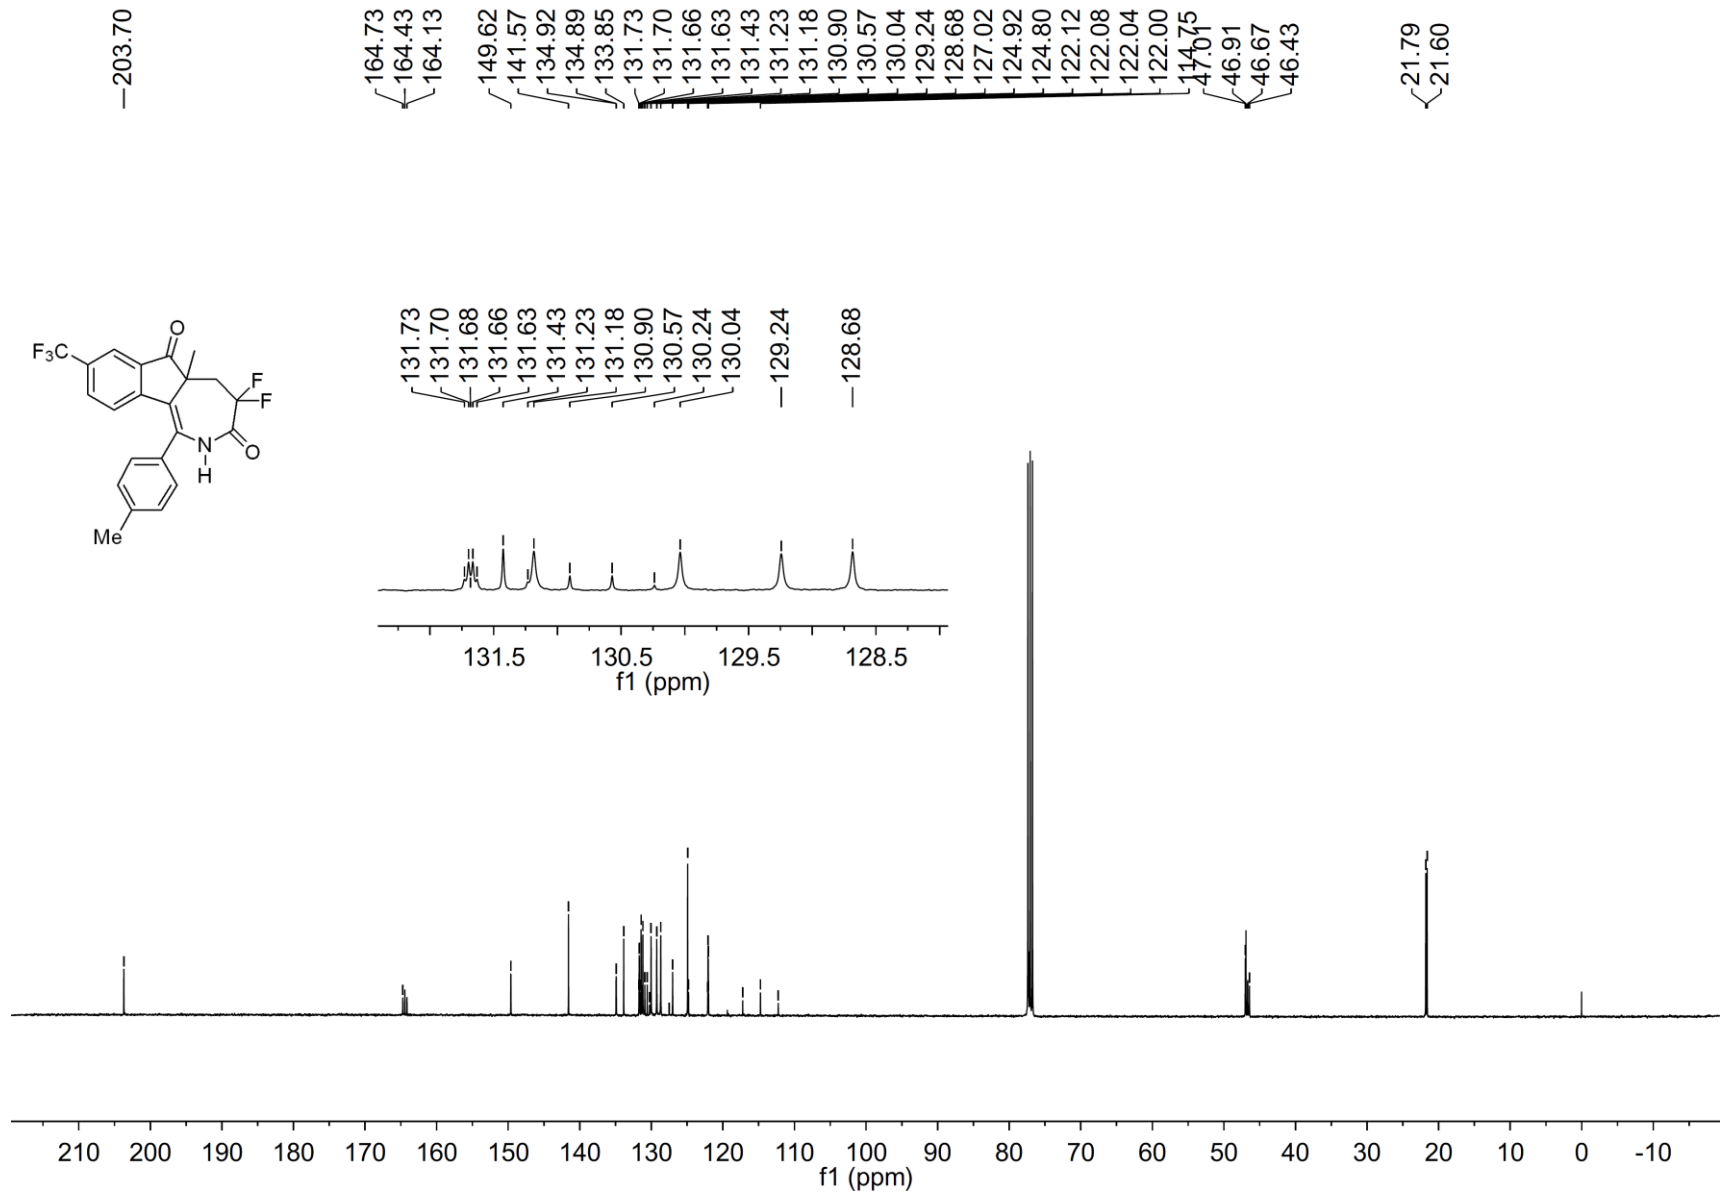

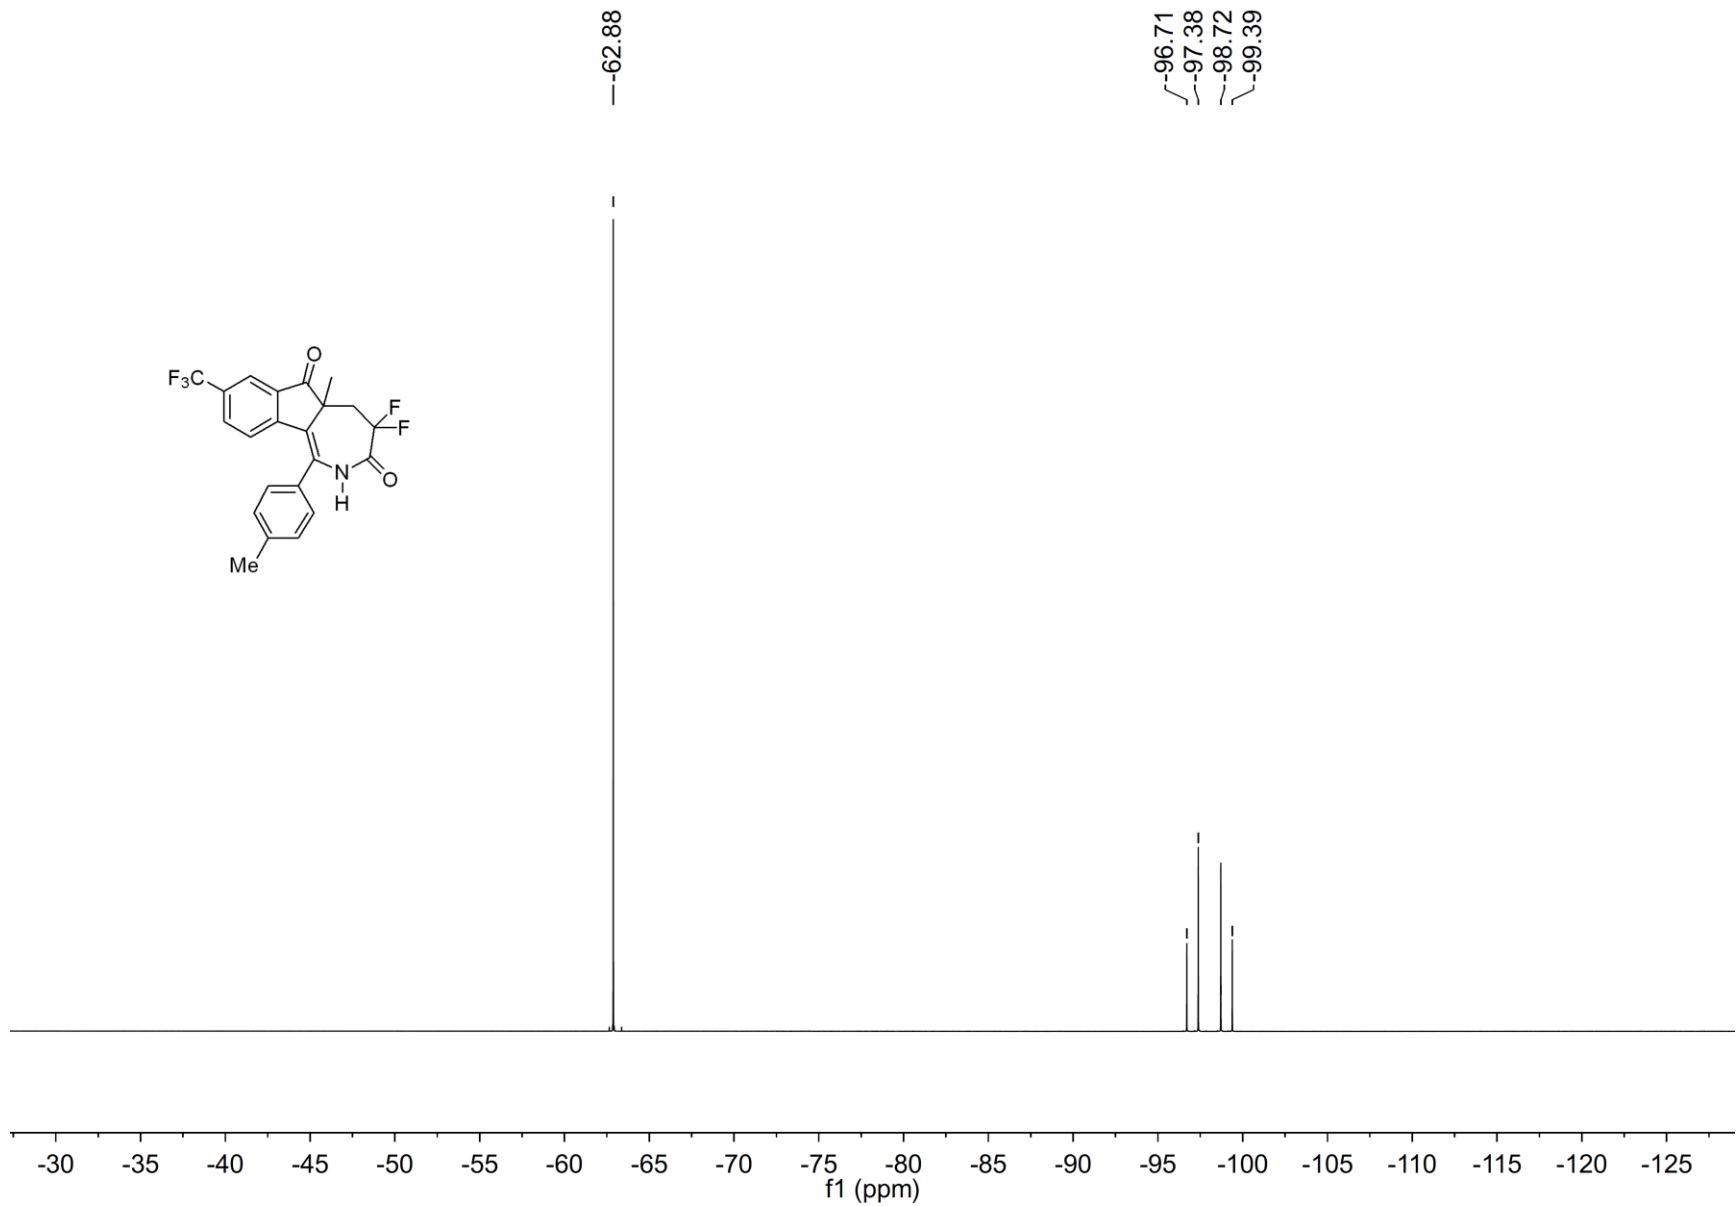

$^{19}\text{F}$  NMR Spectrum of Compound 3z

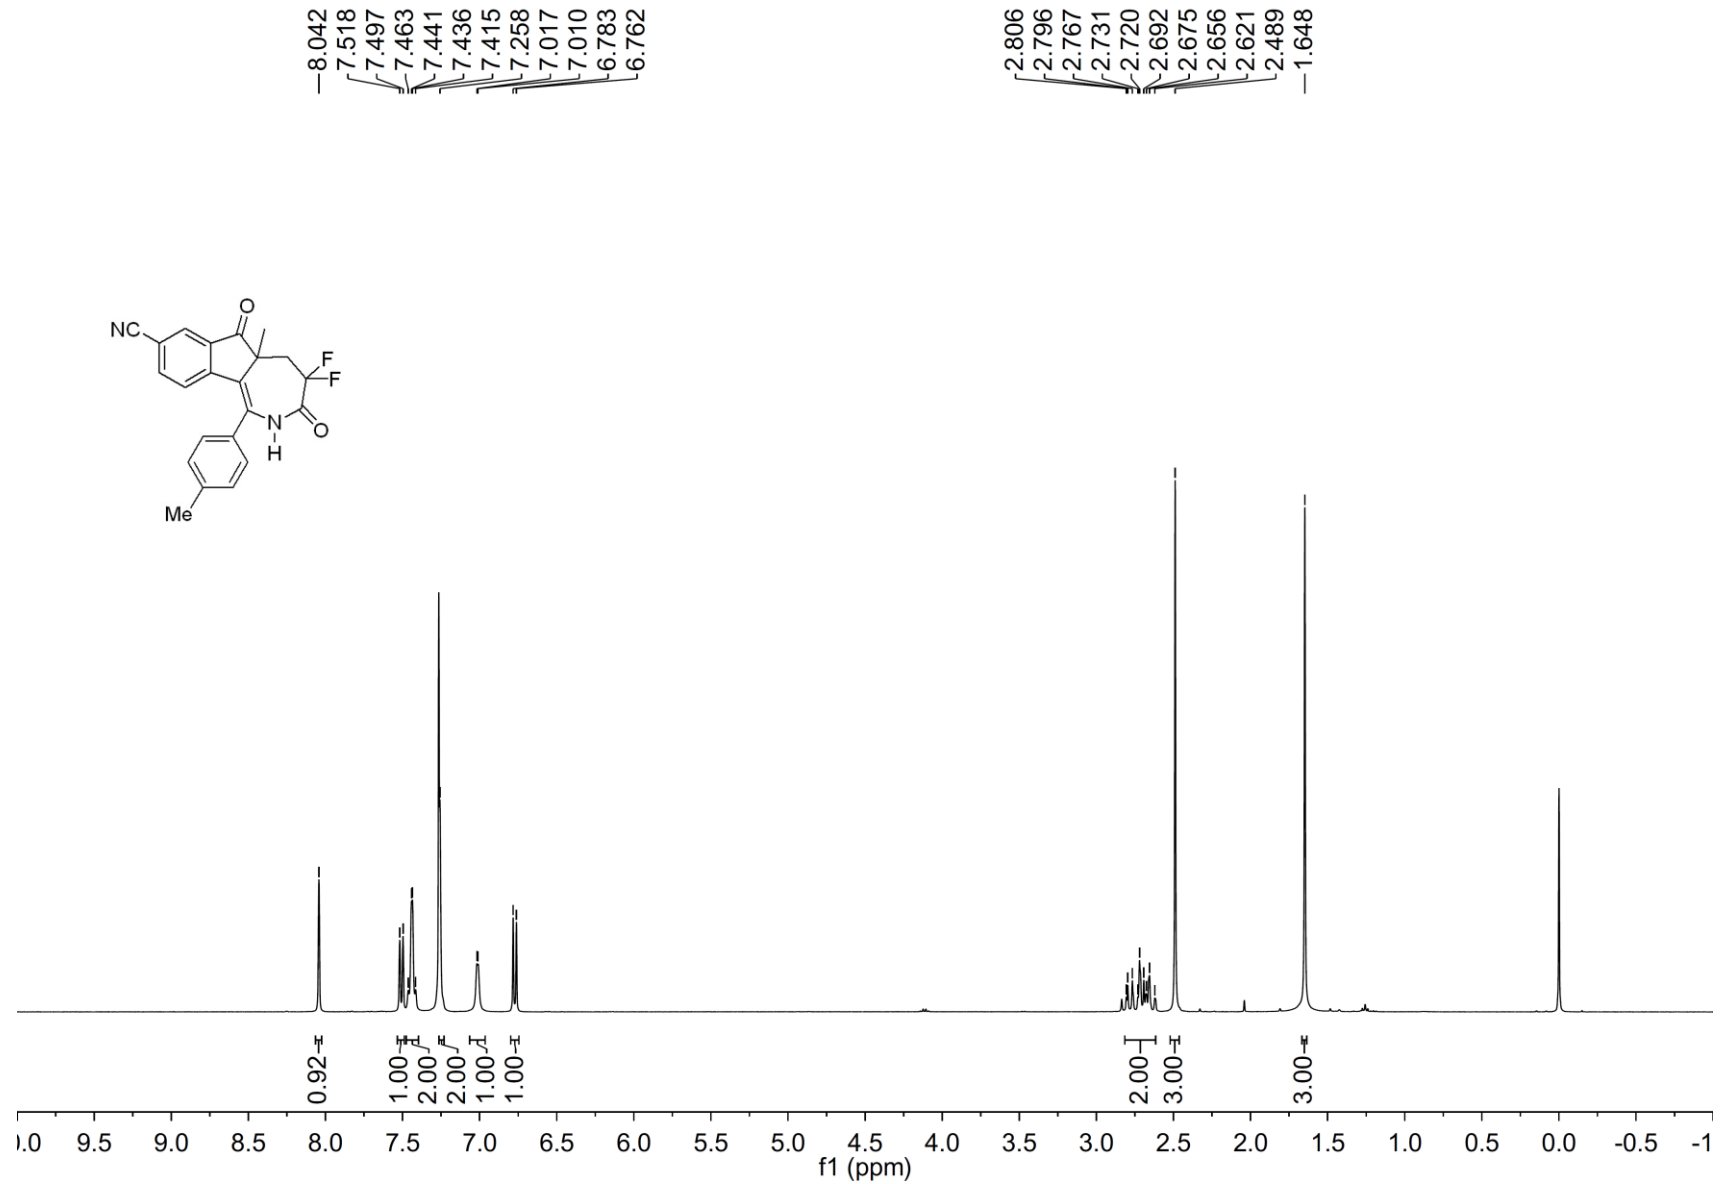

**<sup>1</sup>H NMR Spectrum of Compound 3aa**

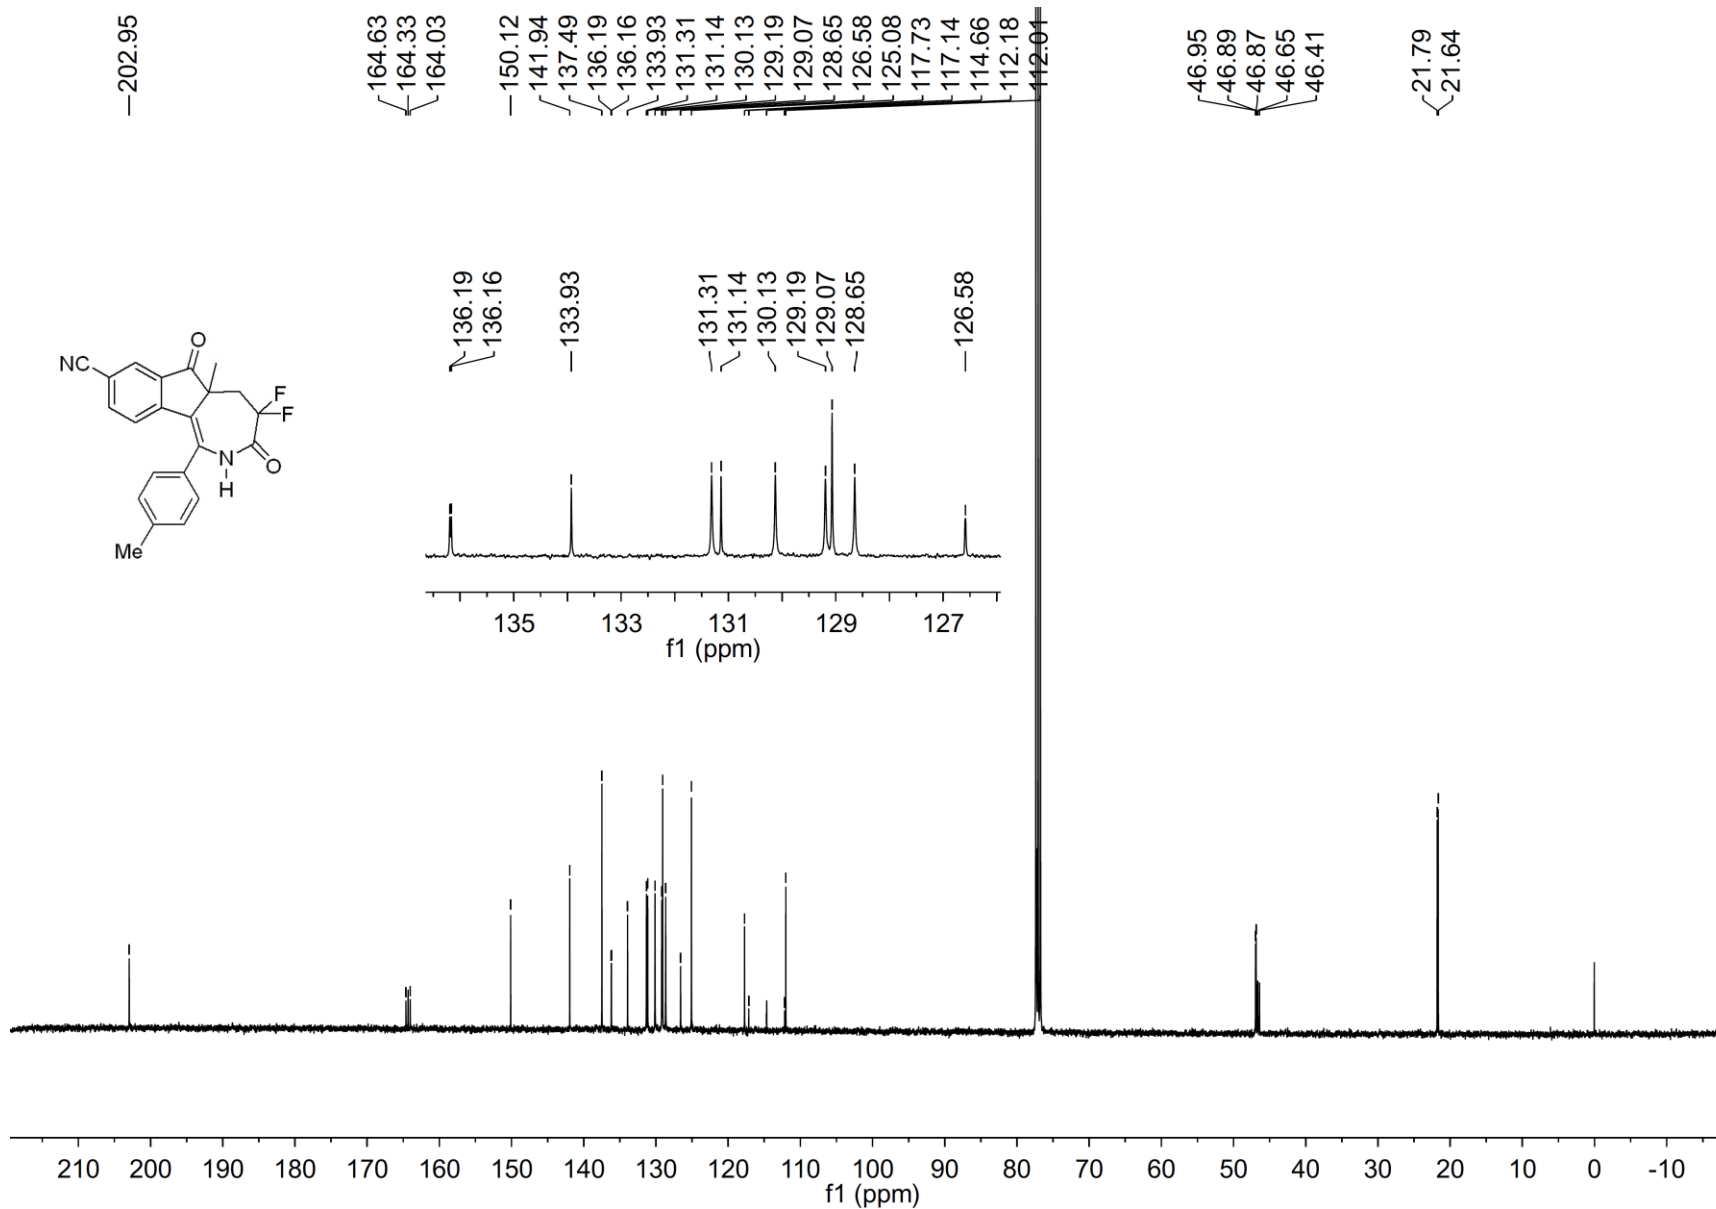

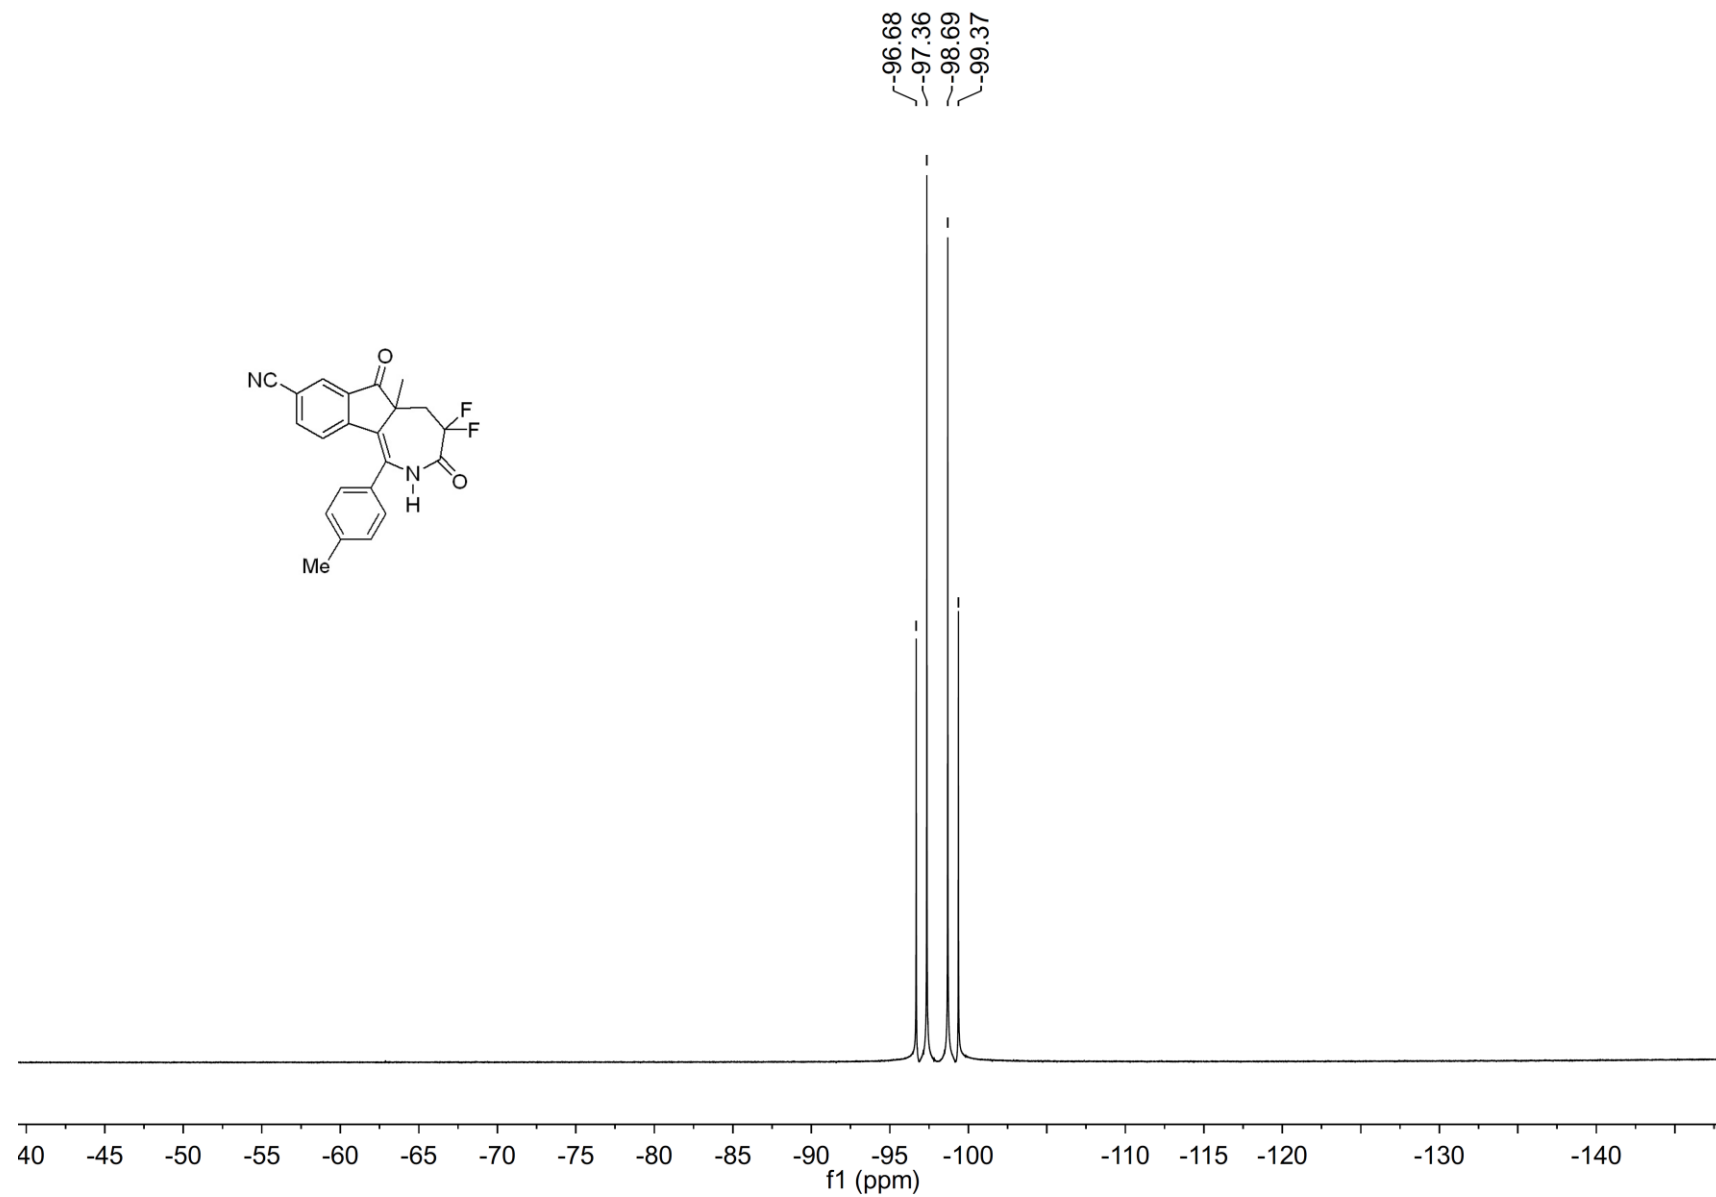

$^{19}\text{F}$  NMR Spectrum of Compound 3aa

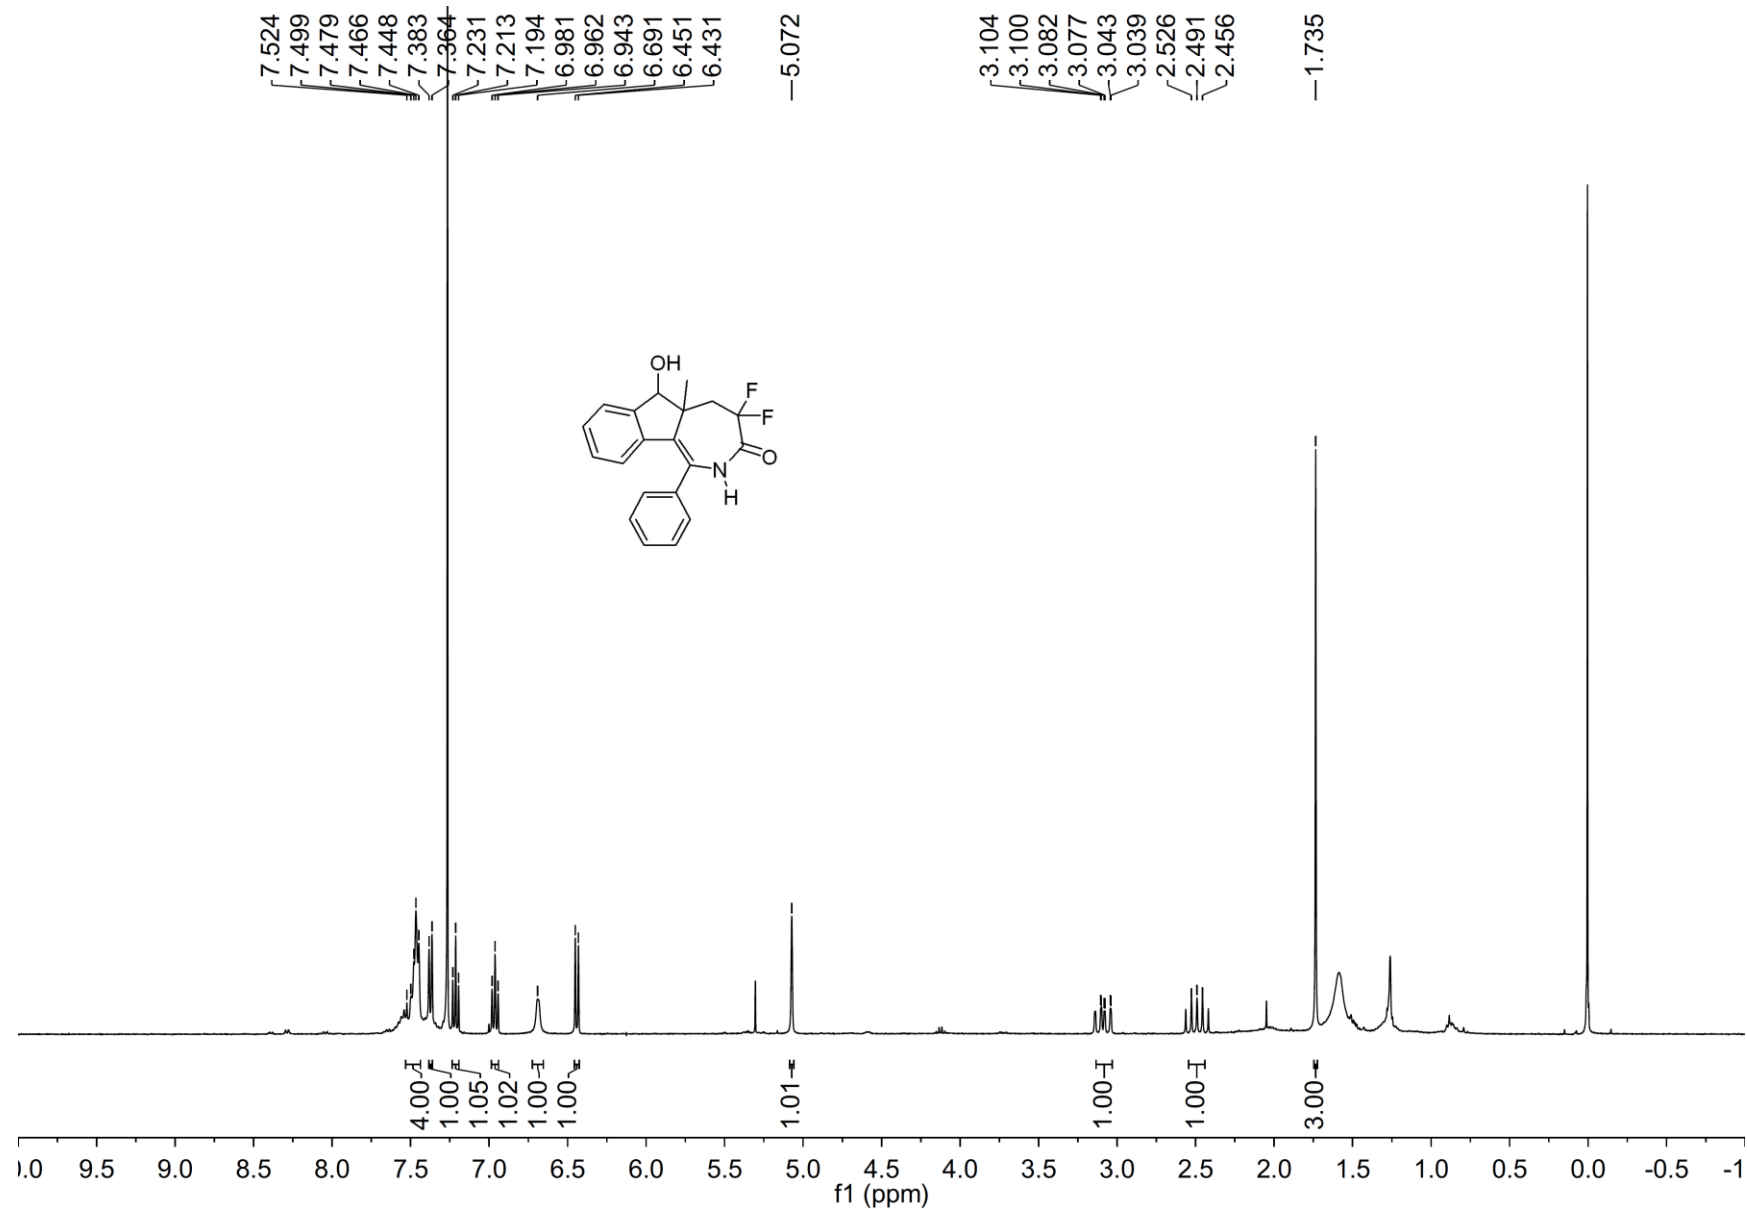

<sup>1</sup>H NMR Spectrum of Compound 5a

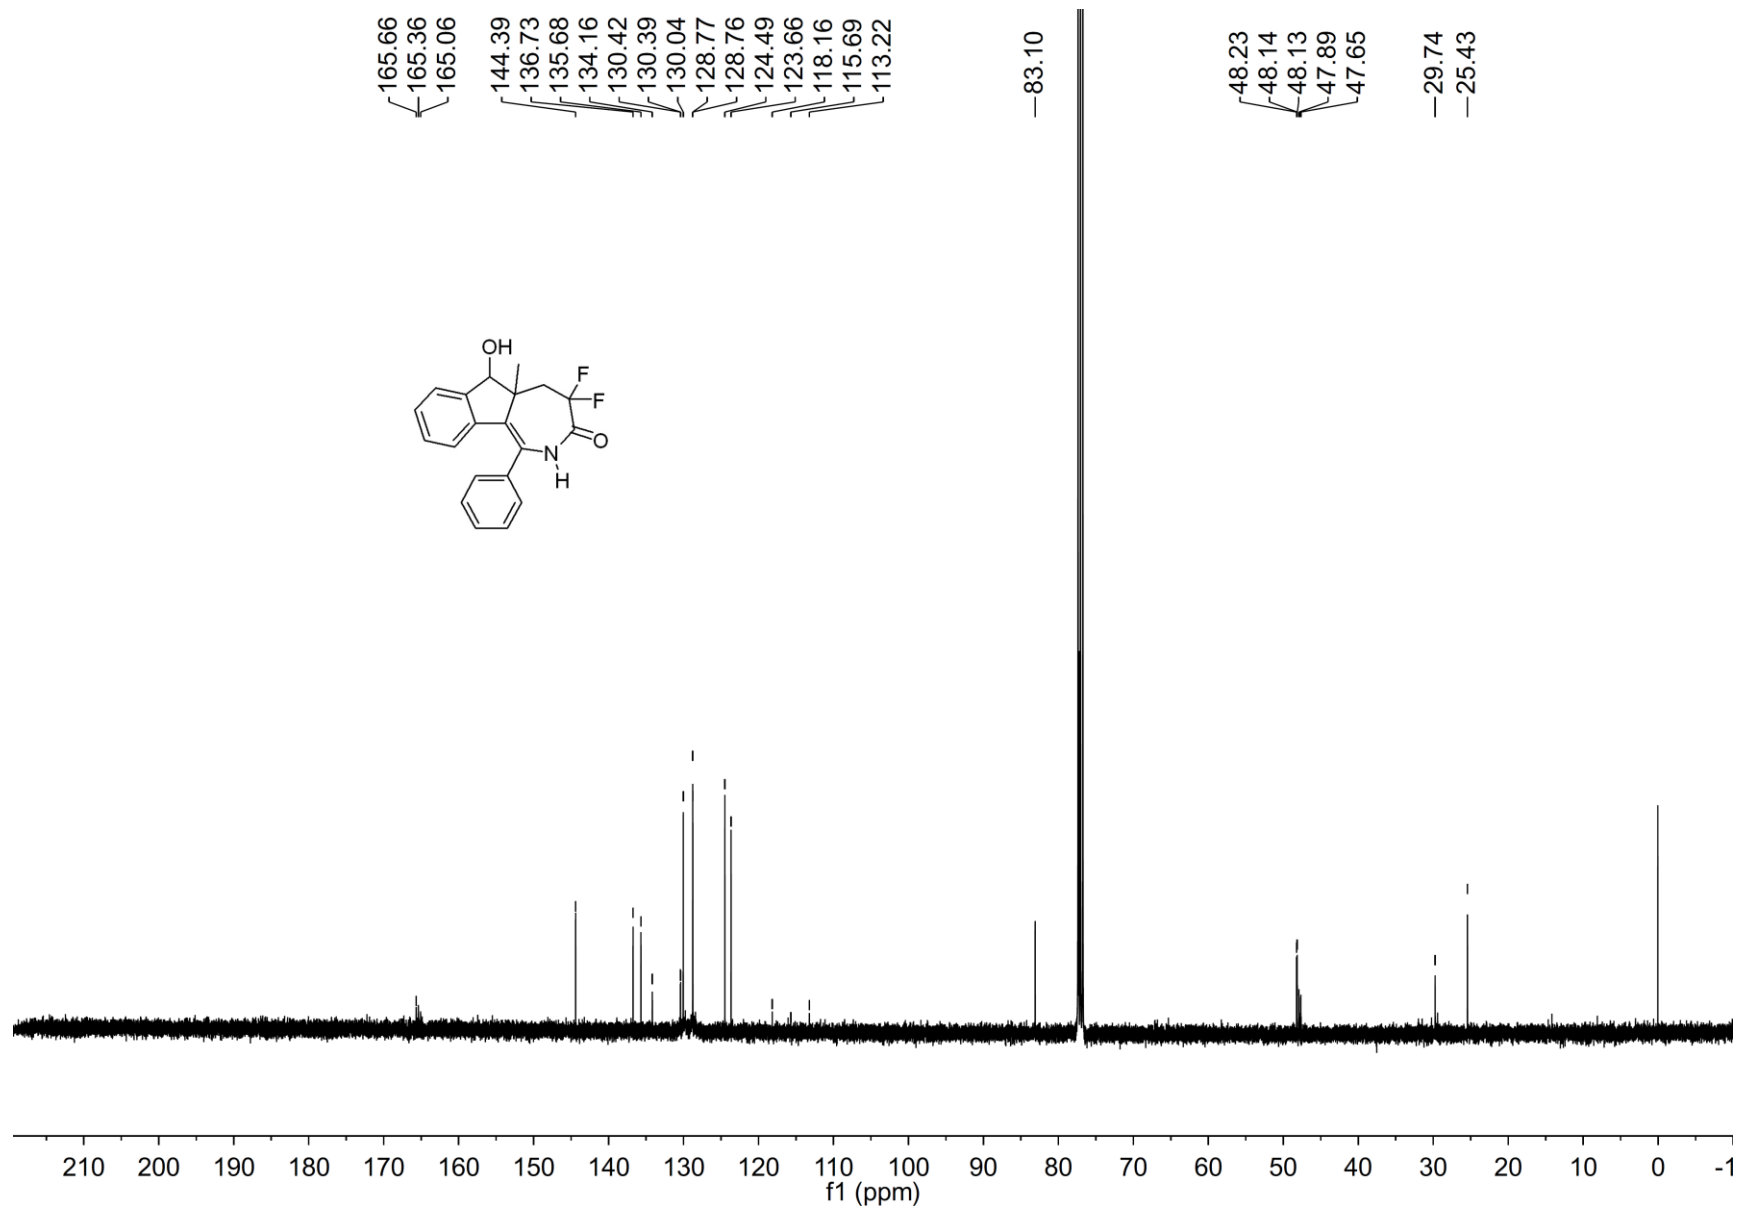

<sup>13</sup>C NMR Spectrum of Compound 5a

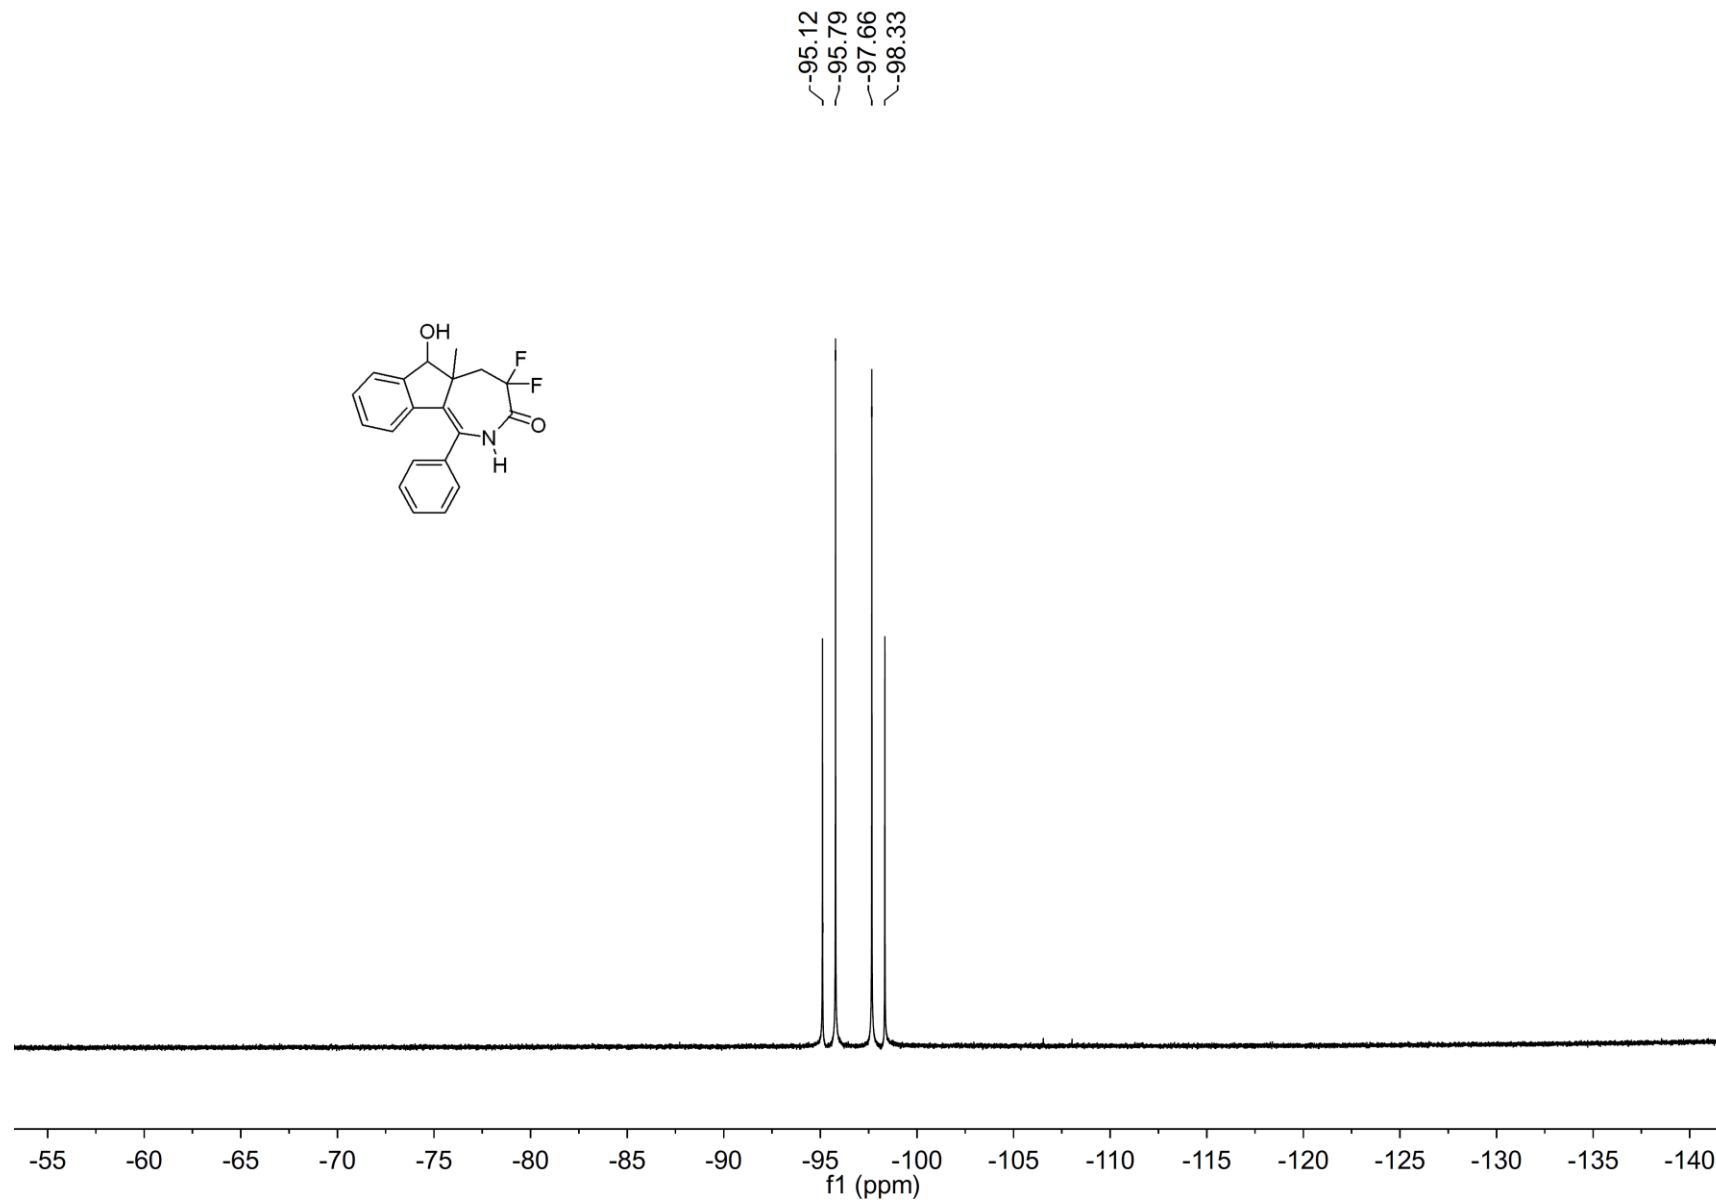

$^{19}\text{F}$  NMR Spectrum of Compound 5a
